# Supplementary material for: Repression of interrupted and intact rDNA by the SUMO pathway in Drosophila melanogaster
Source: bioRxiv preprint, doi:10.1101/2020.07.14.203158, version 1 (2020-07-14)
Supplement: Supplementary File 5 [file 203158_file06.xlsx]

## Sheet: filtered
Supplementary_table_5. Sleuth gene expression analysis output
Name and annotation			sleuth, wald test										sleuth, LRT											values (scaled_reads_per_base)							values(TPM)
target_id	RefSeq_coding	TE(RepBase)	pval.wald	qval.wald	b	se_b	mean_obs.wald	var_obs.wald	tech_var.wald	sigma_sq.wald	smooth_sigma_sq.wald	final_sigma_sq.wald	pval.lrt	qval.lrt	test_stat	rss	degrees_free	mean_obs.lrt	var_obs.lrt	tech_var.lrt	sigma_sq.lrt	smooth_sigma_sq.lrt	final_sigma_sq.lrt	shW.1.srpb	shSmt3.1.srpb	shW.2.srpb	shSmt3.2.srpb	shW.average.srpb	shSmt3.average.srpb	log2FC.srpb	shW.1.tpm	shSmt3.1.tpm	shW.2.tpm	shSmt3.2.tpm	shW.average.tpm	shSmt3.average.tpm	log2FC.tpm
5-HT1A	TRUE	FALSE	NA	NA	NA	NA	NA	NA	NA	NA	NA	NA	TRUE	FALSE	NA	NA	NA	NA	NA	NA	NA	NA	NA	NA	NA	0	2.03041	0	3.7012	0	2.86581	Inf	0	0.0250345	0	0.0455805	0	0.0353075	Inf
5-HT2B	TRUE	FALSE	NA	NA	NA	NA	NA	NA	NA	NA	NA	NA	TRUE	FALSE	NA	NA	NA	NA	NA	NA	NA	NA	NA	NA	NA	0	0.631399	0	0	0	0.3157	Inf	0	0.00983585	0	0	0	0.00491793	Inf
7B2	TRUE	FALSE	NA	NA	NA	NA	NA	NA	NA	NA	NA	NA	TRUE	FALSE	NA	NA	NA	NA	NA	NA	NA	NA	NA	NA	NA	0	0	0	0.932731	0	0.466366	Inf	0	0	0	0.0588061	0	0.029403	Inf
a10	TRUE	FALSE	NA	NA	NA	NA	NA	NA	NA	NA	NA	NA	TRUE	FALSE	NA	NA	NA	NA	NA	NA	NA	NA	NA	NA	NA	0	0	0	0.925301	0	0.46265	Inf	0	0	0	0.149254	0	0.074627	Inf
Acp53C14a	TRUE	FALSE	NA	NA	NA	NA	NA	NA	NA	NA	NA	NA	TRUE	FALSE	NA	NA	NA	NA	NA	NA	NA	NA	NA	NA	NA	0	1.42492	0	0	0	0.712461	Inf	0	0.21548	0	0	0	0.10774	Inf
Acp54A1	TRUE	FALSE	NA	NA	NA	NA	NA	NA	NA	NA	NA	NA	TRUE	FALSE	NA	NA	NA	NA	NA	NA	NA	NA	NA	NA	NA	0	0	0	0.925301	0	0.46265	Inf	0	0	0	0.503469	0	0.251734	Inf
Acp95EF	TRUE	FALSE	NA	NA	NA	NA	NA	NA	NA	NA	NA	NA	TRUE	FALSE	NA	NA	NA	NA	NA	NA	NA	NA	NA	NA	NA	0	1.0152	0	0	0	0.507602	Inf	0	0.990618	0	0	0	0.495309	Inf
ACXB	TRUE	FALSE	NA	NA	NA	NA	NA	NA	NA	NA	NA	NA	TRUE	FALSE	NA	NA	NA	NA	NA	NA	NA	NA	NA	NA	NA	0	1.0152	0	0.925301	0	0.970253	Inf	0	0.017967	0	0.0163563	0	0.0171617	Inf
ACXC	TRUE	FALSE	NA	NA	NA	NA	NA	NA	NA	NA	NA	NA	TRUE	FALSE	NA	NA	NA	NA	NA	NA	NA	NA	NA	NA	NA	0	1.02426	0	0.933557	0	0.978911	Inf	0	0.0182496	0	0.0166136	0	0.0174316	Inf
ACXE	TRUE	FALSE	NA	NA	NA	NA	NA	NA	NA	NA	NA	NA	TRUE	FALSE	NA	NA	NA	NA	NA	NA	NA	NA	NA	NA	NA	0	1.0152	0	1.8506	0	1.4329	Inf	0	0.0185698	0	0.0338102	0	0.02619	Inf
Adgf-B	TRUE	FALSE	NA	NA	NA	NA	NA	NA	NA	NA	NA	NA	TRUE	FALSE	NA	NA	NA	NA	NA	NA	NA	NA	NA	NA	NA	0	1.0152	0	0	0	0.507602	Inf	0	0.0403567	0	0	0	0.0201784	Inf
Ag5r	TRUE	FALSE	NA	NA	NA	NA	NA	NA	NA	NA	NA	NA	TRUE	FALSE	NA	NA	NA	NA	NA	NA	NA	NA	NA	NA	NA	0	2.03041	0	100.891	0	51.4608	Inf	0	0.0967656	0	4.80255	0	2.44966	Inf
Ag5r2	TRUE	FALSE	NA	NA	NA	NA	NA	NA	NA	NA	NA	NA	TRUE	FALSE	NA	NA	NA	NA	NA	NA	NA	NA	NA	NA	NA	0	0	0	2.7759	0	1.38795	Inf	0	0	0	0.2535	0	0.12675	Inf
alpha-Est6	TRUE	FALSE	NA	NA	NA	NA	NA	NA	NA	NA	NA	NA	TRUE	FALSE	NA	NA	NA	NA	NA	NA	NA	NA	NA	NA	NA	0	0	0	0.925301	0	0.46265	Inf	0	0	0	0.033552	0	0.016776	Inf
ALUII_DM|Drosophila_fruit_fly_genus	FALSE	TRUE	NA	NA	NA	NA	NA	NA	NA	NA	NA	NA	FALSE	TRUE	NA	NA	NA	NA	NA	NA	NA	NA	NA	NA	NA	0	0	0	0.925301	0	0.46265	Inf	0	0	0	0.928456	0	0.464228	Inf
Amnionless	TRUE	FALSE	NA	NA	NA	NA	NA	NA	NA	NA	NA	NA	TRUE	FALSE	NA	NA	NA	NA	NA	NA	NA	NA	NA	NA	NA	0	1.08782	0	0	0	0.543909	Inf	0	0.0407107	0	0	0	0.0203554	Inf
Amyrel	TRUE	FALSE	NA	NA	NA	NA	NA	NA	NA	NA	NA	NA	TRUE	FALSE	NA	NA	NA	NA	NA	NA	NA	NA	NA	NA	NA	0	1.0152	0	0	0	0.507602	Inf	0	0.0446914	0	0	0	0.0223457	Inf
Ance-2	TRUE	FALSE	NA	NA	NA	NA	NA	NA	NA	NA	NA	NA	TRUE	FALSE	NA	NA	NA	NA	NA	NA	NA	NA	NA	NA	NA	0	1.0152	0	0	0	0.507602	Inf	0	0.0298237	0	0	0	0.0149118	Inf
Ance-3	TRUE	FALSE	NA	NA	NA	NA	NA	NA	NA	NA	NA	NA	TRUE	FALSE	NA	NA	NA	NA	NA	NA	NA	NA	NA	NA	NA	0	1.0964	0	0	0	0.5482	Inf	0	0.021687	0	0	0	0.0108435	Inf
Aplip1	TRUE	FALSE	NA	NA	NA	NA	NA	NA	NA	NA	NA	NA	TRUE	FALSE	NA	NA	NA	NA	NA	NA	NA	NA	NA	NA	NA	0	1.02007	0	0	0	0.510035	Inf	0	0.0275369	0	0	0	0.0137684	Inf
AQP	TRUE	FALSE	NA	NA	NA	NA	NA	NA	NA	NA	NA	NA	TRUE	FALSE	NA	NA	NA	NA	NA	NA	NA	NA	NA	NA	NA	0	1.01166	0	0	0	0.505829	Inf	0	0.060213	0	0	0	0.0301065	Inf
Arp53D	TRUE	FALSE	NA	NA	NA	NA	NA	NA	NA	NA	NA	NA	TRUE	FALSE	NA	NA	NA	NA	NA	NA	NA	NA	NA	NA	NA	0	2.03041	0	0	0	1.0152	Inf	0	0.102347	0	0	0	0.0511734	Inf
Arr2	TRUE	FALSE	NA	NA	NA	NA	NA	NA	NA	NA	NA	NA	TRUE	FALSE	NA	NA	NA	NA	NA	NA	NA	NA	NA	NA	NA	0	1.0152	0	0	0	0.507602	Inf	0	0.0447577	0	0	0	0.0223788	Inf
ARS406_DM|Drosophila_fruit_fly_genus	FALSE	TRUE	NA	NA	NA	NA	NA	NA	NA	NA	NA	NA	FALSE	TRUE	NA	NA	NA	NA	NA	NA	NA	NA	NA	NA	NA	0	2.03041	0	1.8506	0	1.94051	Inf	0	0.782668	0	0.712505	0	0.747586	Inf
AstC	TRUE	FALSE	NA	NA	NA	NA	NA	NA	NA	NA	NA	NA	TRUE	FALSE	NA	NA	NA	NA	NA	NA	NA	NA	NA	NA	NA	0	0	0	1.85323	0	0.926616	Inf	0	0	0	0.109841	0	0.0549205	Inf
b6	TRUE	FALSE	NA	NA	NA	NA	NA	NA	NA	NA	NA	NA	TRUE	FALSE	NA	NA	NA	NA	NA	NA	NA	NA	NA	NA	NA	0	0	0	0.925301	0	0.46265	Inf	0	0	0	0.0283117	0	0.0141558	Inf
Bace	TRUE	FALSE	NA	NA	NA	NA	NA	NA	NA	NA	NA	NA	TRUE	FALSE	NA	NA	NA	NA	NA	NA	NA	NA	NA	NA	NA	0	0	0	924.254	0	462.127	Inf	0	0	0	49.4927	0	24.7464	Inf
BBS1	TRUE	FALSE	NA	NA	NA	NA	NA	NA	NA	NA	NA	NA	TRUE	FALSE	NA	NA	NA	NA	NA	NA	NA	NA	NA	NA	NA	0	0	0	1.8506	0	0.925301	Inf	0	0	0	0.058743	0	0.0293715	Inf
beat-IIa	TRUE	FALSE	NA	NA	NA	NA	NA	NA	NA	NA	NA	NA	TRUE	FALSE	NA	NA	NA	NA	NA	NA	NA	NA	NA	NA	NA	0	1.04512	0	0	0	0.52256	Inf	0	0.0229404	0	0	0	0.0114702	Inf
beat-IV	TRUE	FALSE	NA	NA	NA	NA	NA	NA	NA	NA	NA	NA	TRUE	FALSE	NA	NA	NA	NA	NA	NA	NA	NA	NA	NA	NA	0	6.6139	0	0	0	3.30695	Inf	0	0.137747	0	0	0	0.0688735	Inf
beat-Vc	TRUE	FALSE	NA	NA	NA	NA	NA	NA	NA	NA	NA	NA	TRUE	FALSE	NA	NA	NA	NA	NA	NA	NA	NA	NA	NA	NA	0	0	0	0.925301	0	0.46265	Inf	0	0	0	0.0270565	0	0.0135282	Inf
betaNACtes3	TRUE	FALSE	NA	NA	NA	NA	NA	NA	NA	NA	NA	NA	TRUE	FALSE	NA	NA	NA	NA	NA	NA	NA	NA	NA	NA	NA	0	0.507602	0	0	0	0.253801	Inf	0	0.0392797	0	0	0	0.0196398	Inf
betaNACtes6	TRUE	FALSE	NA	NA	NA	NA	NA	NA	NA	NA	NA	NA	TRUE	FALSE	NA	NA	NA	NA	NA	NA	NA	NA	NA	NA	NA	0	0.507602	0	0	0	0.253801	Inf	0	0.0392797	0	0	0	0.0196398	Inf
betaTry	TRUE	FALSE	NA	NA	NA	NA	NA	NA	NA	NA	NA	NA	TRUE	FALSE	NA	NA	NA	NA	NA	NA	NA	NA	NA	NA	NA	0	0	0	440.584	0	220.292	Inf	0	0	0	35.1987	0	17.5994	Inf
boss	TRUE	FALSE	NA	NA	NA	NA	NA	NA	NA	NA	NA	NA	TRUE	FALSE	NA	NA	NA	NA	NA	NA	NA	NA	NA	NA	NA	0	0	0	0.925301	0	0.46265	Inf	0	0	0	0.0195183	0	0.00975917	Inf
Brd	TRUE	FALSE	NA	NA	NA	NA	NA	NA	NA	NA	NA	NA	TRUE	FALSE	NA	NA	NA	NA	NA	NA	NA	NA	NA	NA	NA	0	3.04561	0	3.7012	0	3.37341	Inf	0	0.543552	0	0.659766	0	0.601659	Inf
Bro	TRUE	FALSE	NA	NA	NA	NA	NA	NA	NA	NA	NA	NA	TRUE	FALSE	NA	NA	NA	NA	NA	NA	NA	NA	NA	NA	NA	0	1.0152	0	0.925301	0	0.970253	Inf	0	0.110704	0	0.10078	0	0.105742	Inf
brv2	TRUE	FALSE	NA	NA	NA	NA	NA	NA	NA	NA	NA	NA	TRUE	FALSE	NA	NA	NA	NA	NA	NA	NA	NA	NA	NA	NA	0	1.03114	0	0.939828	0	0.985485	Inf	0	0.0287028	0	0.0261297	0	0.0274162	Inf
CadN2	TRUE	FALSE	NA	NA	NA	NA	NA	NA	NA	NA	NA	NA	TRUE	FALSE	NA	NA	NA	NA	NA	NA	NA	NA	NA	NA	NA	0	3.19614	0	3.53473	0	3.36544	Inf	0	0.0257797	0	0.0284767	0	0.0271282	Inf
CanB	TRUE	FALSE	NA	NA	NA	NA	NA	NA	NA	NA	NA	NA	TRUE	FALSE	NA	NA	NA	NA	NA	NA	NA	NA	NA	NA	NA	0	0	0	0.957477	0	0.478738	Inf	0	0	0	0.0578766	0	0.0289383	Inf
CapaR	TRUE	FALSE	NA	NA	NA	NA	NA	NA	NA	NA	NA	NA	TRUE	FALSE	NA	NA	NA	NA	NA	NA	NA	NA	NA	NA	NA	0	3.0501	0	0	0	1.52505	Inf	0	0.111514	0	0	0	0.0557572	Inf
caup	TRUE	FALSE	NA	NA	NA	NA	NA	NA	NA	NA	NA	NA	TRUE	FALSE	NA	NA	NA	NA	NA	NA	NA	NA	NA	NA	NA	0	1.0152	0	0	0	0.507602	Inf	0	0.0146511	0	0	0	0.00732554	Inf
Cby	TRUE	FALSE	NA	NA	NA	NA	NA	NA	NA	NA	NA	NA	TRUE	FALSE	NA	NA	NA	NA	NA	NA	NA	NA	NA	NA	NA	0	6.53734	0	4.53752	0	5.53743	Inf	0	1.1427	0	0.792192	0	0.967446	Inf
Ccp84Aa	TRUE	FALSE	NA	NA	NA	NA	NA	NA	NA	NA	NA	NA	TRUE	FALSE	NA	NA	NA	NA	NA	NA	NA	NA	NA	NA	NA	0	0	0	2.7759	0	1.38795	Inf	0	0	0	0.291122	0	0.145561	Inf
Ccp84Ab	TRUE	FALSE	NA	NA	NA	NA	NA	NA	NA	NA	NA	NA	TRUE	FALSE	NA	NA	NA	NA	NA	NA	NA	NA	NA	NA	NA	0	2.03041	0	0	0	1.0152	Inf	0	0.190027	0	0	0	0.0950137	Inf
CecB	TRUE	FALSE	NA	NA	NA	NA	NA	NA	NA	NA	NA	NA	TRUE	FALSE	NA	NA	NA	NA	NA	NA	NA	NA	NA	NA	NA	0	0	0	0.925301	0	0.46265	Inf	0	0	0	0.243035	0	0.121517	Inf
CecC	TRUE	FALSE	NA	NA	NA	NA	NA	NA	NA	NA	NA	NA	TRUE	FALSE	NA	NA	NA	NA	NA	NA	NA	NA	NA	NA	NA	0	1.0152	0	1.8506	0	1.4329	Inf	0	0.322615	0	0.587388	0	0.455002	Inf
CG10029	TRUE	FALSE	NA	NA	NA	NA	NA	NA	NA	NA	NA	NA	TRUE	FALSE	NA	NA	NA	NA	NA	NA	NA	NA	NA	NA	NA	0	0	0	1.03695	0	0.518474	Inf	0	0	0	0.046507	0	0.0232535	Inf
CG10041	TRUE	FALSE	NA	NA	NA	NA	NA	NA	NA	NA	NA	NA	TRUE	FALSE	NA	NA	NA	NA	NA	NA	NA	NA	NA	NA	NA	0	3.04561	0	3.7012	0	3.37341	Inf	0	0.240373	0	0.291766	0	0.266069	Inf
CG10051	TRUE	FALSE	NA	NA	NA	NA	NA	NA	NA	NA	NA	NA	TRUE	FALSE	NA	NA	NA	NA	NA	NA	NA	NA	NA	NA	NA	0	1.0152	0	0	0	0.507602	Inf	0	0.0234851	0	0	0	0.0117425	Inf
CG10086	TRUE	FALSE	NA	NA	NA	NA	NA	NA	NA	NA	NA	NA	TRUE	FALSE	NA	NA	NA	NA	NA	NA	NA	NA	NA	NA	NA	0	2.03041	0	12.0289	0	7.02966	Inf	0	0.0724724	0	0.428841	0	0.250657	Inf
CG10104	TRUE	FALSE	NA	NA	NA	NA	NA	NA	NA	NA	NA	NA	TRUE	FALSE	NA	NA	NA	NA	NA	NA	NA	NA	NA	NA	NA	0	0	0	0.925301	0	0.46265	Inf	0	0	0	0.0417679	0	0.0208839	Inf
CG10131	TRUE	FALSE	NA	NA	NA	NA	NA	NA	NA	NA	NA	NA	TRUE	FALSE	NA	NA	NA	NA	NA	NA	NA	NA	NA	NA	NA	0	0	0	0.925301	0	0.46265	Inf	0	0	0	0.0639405	0	0.0319703	Inf
CG10168	TRUE	FALSE	NA	NA	NA	NA	NA	NA	NA	NA	NA	NA	TRUE	FALSE	NA	NA	NA	NA	NA	NA	NA	NA	NA	NA	NA	0	0	0	1.8506	0	0.925301	Inf	0	0	0	0.0662941	0	0.0331471	Inf
CG10170	TRUE	FALSE	NA	NA	NA	NA	NA	NA	NA	NA	NA	NA	TRUE	FALSE	NA	NA	NA	NA	NA	NA	NA	NA	NA	NA	NA	0	1.0152	0	9.25301	0	5.13411	Inf	0	0.0385516	0	0.350957	0	0.194754	Inf
CG10185	TRUE	FALSE	NA	NA	NA	NA	NA	NA	NA	NA	NA	NA	TRUE	FALSE	NA	NA	NA	NA	NA	NA	NA	NA	NA	NA	NA	0	3.04561	0	2.7759	0	2.91076	Inf	0	0.034942	0	0.0318096	0	0.0333758	Inf
CG10232	TRUE	FALSE	NA	NA	NA	NA	NA	NA	NA	NA	NA	NA	TRUE	FALSE	NA	NA	NA	NA	NA	NA	NA	NA	NA	NA	NA	0	3.04561	0	0.925301	0	1.98546	Inf	0	0.108709	0	0.0329878	0	0.0708482	Inf
CG10257	TRUE	FALSE	NA	NA	NA	NA	NA	NA	NA	NA	NA	NA	TRUE	FALSE	NA	NA	NA	NA	NA	NA	NA	NA	NA	NA	NA	0	0	0	0.925301	0	0.46265	Inf	0	0	0	0.0466255	0	0.0233127	Inf
CG10300	TRUE	FALSE	NA	NA	NA	NA	NA	NA	NA	NA	NA	NA	TRUE	FALSE	NA	NA	NA	NA	NA	NA	NA	NA	NA	NA	NA	0	0	0	0.925301	0	0.46265	Inf	0	0	0	0.042743	0	0.0213715	Inf
CG10352	TRUE	FALSE	NA	NA	NA	NA	NA	NA	NA	NA	NA	NA	TRUE	FALSE	NA	NA	NA	NA	NA	NA	NA	NA	NA	NA	NA	0	1.0152	0	1.8506	0	1.4329	Inf	0	0.0466977	0	0.0850228	0	0.0658602	Inf
CG10362	TRUE	FALSE	NA	NA	NA	NA	NA	NA	NA	NA	NA	NA	TRUE	FALSE	NA	NA	NA	NA	NA	NA	NA	NA	NA	NA	NA	0	3.04561	0	2.7759	0	2.91076	Inf	0	0.0506009	0	0.0460648	0	0.0483329	Inf
CG10472	TRUE	FALSE	NA	NA	NA	NA	NA	NA	NA	NA	NA	NA	TRUE	FALSE	NA	NA	NA	NA	NA	NA	NA	NA	NA	NA	NA	0	1.0152	0	0.925301	0	0.970253	Inf	0	0.0818638	0	0.0745251	0	0.0781944	Inf
CG10474	TRUE	FALSE	NA	NA	NA	NA	NA	NA	NA	NA	NA	NA	TRUE	FALSE	NA	NA	NA	NA	NA	NA	NA	NA	NA	NA	NA	0	0	0	0.925301	0	0.46265	Inf	0	0	0	0.0511404	0	0.0255702	Inf
CG10477	TRUE	FALSE	NA	NA	NA	NA	NA	NA	NA	NA	NA	NA	TRUE	FALSE	NA	NA	NA	NA	NA	NA	NA	NA	NA	NA	NA	0	0	0	3.7012	0	1.8506	Inf	0	0	0	0.18907	0	0.0945349	Inf
CG10589	TRUE	FALSE	NA	NA	NA	NA	NA	NA	NA	NA	NA	NA	TRUE	FALSE	NA	NA	NA	NA	NA	NA	NA	NA	NA	NA	NA	0	1.0152	0	0	0	0.507602	Inf	0	0.0517439	0	0	0	0.025872	Inf
CG10657	TRUE	FALSE	NA	NA	NA	NA	NA	NA	NA	NA	NA	NA	TRUE	FALSE	NA	NA	NA	NA	NA	NA	NA	NA	NA	NA	NA	0	3.04561	0	1.8506	0	2.44811	Inf	0	0.136604	0	0.0829053	0	0.109755	Inf
CG10659	TRUE	FALSE	NA	NA	NA	NA	NA	NA	NA	NA	NA	NA	TRUE	FALSE	NA	NA	NA	NA	NA	NA	NA	NA	NA	NA	NA	0	0	0	12.0289	0	6.01446	Inf	0	0	0	1.11916	0	0.559581	Inf
CG10694	TRUE	FALSE	NA	NA	NA	NA	NA	NA	NA	NA	NA	NA	TRUE	FALSE	NA	NA	NA	NA	NA	NA	NA	NA	NA	NA	NA	0	2.03041	0	0.925301	0	1.47786	Inf	0	0.156914	0	0.0714239	0	0.114169	Inf
CG10804	TRUE	FALSE	NA	NA	NA	NA	NA	NA	NA	NA	NA	NA	TRUE	FALSE	NA	NA	NA	NA	NA	NA	NA	NA	NA	NA	NA	0	7.36515	0	0.958987	0	4.16207	Inf	0	0.107518	0	0.0139828	0	0.0607506	Inf
CG10841	TRUE	FALSE	NA	NA	NA	NA	NA	NA	NA	NA	NA	NA	TRUE	FALSE	NA	NA	NA	NA	NA	NA	NA	NA	NA	NA	NA	0	3.04704	0	0	0	1.52352	Inf	0	0.0821058	0	0	0	0.0410529	Inf
CG10910	TRUE	FALSE	NA	NA	NA	NA	NA	NA	NA	NA	NA	NA	TRUE	FALSE	NA	NA	NA	NA	NA	NA	NA	NA	NA	NA	NA	0	0	0	30.5349	0	15.2675	Inf	0	0	0	1.01145	0	0.505724	Inf
CG10911	TRUE	FALSE	NA	NA	NA	NA	NA	NA	NA	NA	NA	NA	TRUE	FALSE	NA	NA	NA	NA	NA	NA	NA	NA	NA	NA	NA	0	0	0	110.111	0	55.0554	Inf	0	0	0	6.39536	0	3.19768	Inf
CG10912	TRUE	FALSE	NA	NA	NA	NA	NA	NA	NA	NA	NA	NA	TRUE	FALSE	NA	NA	NA	NA	NA	NA	NA	NA	NA	NA	NA	0	0	0	17.5807	0	8.79036	Inf	0	0	0	1.46776	0	0.733878	Inf
CG10943	TRUE	FALSE	NA	NA	NA	NA	NA	NA	NA	NA	NA	NA	TRUE	FALSE	NA	NA	NA	NA	NA	NA	NA	NA	NA	NA	NA	0	0	0	3.7012	0	1.8506	Inf	0	0	0	0.231019	0	0.11551	Inf
CG11068	TRUE	FALSE	NA	NA	NA	NA	NA	NA	NA	NA	NA	NA	TRUE	FALSE	NA	NA	NA	NA	NA	NA	NA	NA	NA	NA	NA	0	1.0152	0	1.8506	0	1.4329	Inf	0	0.0563337	0	0.102567	0	0.0794505	Inf
CG11085	TRUE	FALSE	NA	NA	NA	NA	NA	NA	NA	NA	NA	NA	TRUE	FALSE	NA	NA	NA	NA	NA	NA	NA	NA	NA	NA	NA	0	0	0	0.925301	0	0.46265	Inf	0	0	0	0.0408362	0	0.0204181	Inf
CG11149	TRUE	FALSE	NA	NA	NA	NA	NA	NA	NA	NA	NA	NA	TRUE	FALSE	NA	NA	NA	NA	NA	NA	NA	NA	NA	NA	NA	0	0	0	2.86413	0	1.43207	Inf	0	0	0	0.096983	0	0.0484915	Inf
CG11227	TRUE	FALSE	NA	NA	NA	NA	NA	NA	NA	NA	NA	NA	TRUE	FALSE	NA	NA	NA	NA	NA	NA	NA	NA	NA	NA	NA	0	1.05275	0	0	0	0.526377	Inf	0	0.0272139	0	0	0	0.013607	Inf
CG11236	TRUE	FALSE	NA	NA	NA	NA	NA	NA	NA	NA	NA	NA	TRUE	FALSE	NA	NA	NA	NA	NA	NA	NA	NA	NA	NA	NA	0	2.0398	0	4.6479	0	3.34385	Inf	0	0.124015	0	0.282245	0	0.20313	Inf
CG1126	TRUE	FALSE	NA	NA	NA	NA	NA	NA	NA	NA	NA	NA	TRUE	FALSE	NA	NA	NA	NA	NA	NA	NA	NA	NA	NA	NA	0	0	0	0.925301	0	0.46265	Inf	0	0	0	0.0533769	0	0.0266884	Inf
CG11318	TRUE	FALSE	NA	NA	NA	NA	NA	NA	NA	NA	NA	NA	TRUE	FALSE	NA	NA	NA	NA	NA	NA	NA	NA	NA	NA	NA	0	0	0	0.925301	0	0.46265	Inf	0	0	0	0.0214131	0	0.0107066	Inf
CG11322	TRUE	FALSE	NA	NA	NA	NA	NA	NA	NA	NA	NA	NA	TRUE	FALSE	NA	NA	NA	NA	NA	NA	NA	NA	NA	NA	NA	0	1.0152	0	0	0	0.507602	Inf	0	0.038527	0	0	0	0.0192635	Inf
CG11356	TRUE	FALSE	NA	NA	NA	NA	NA	NA	NA	NA	NA	NA	TRUE	FALSE	NA	NA	NA	NA	NA	NA	NA	NA	NA	NA	NA	0	1.0152	0	0.925301	0	0.970253	Inf	0	0.104384	0	0.0950261	0	0.0997049	Inf
CG11369	TRUE	FALSE	NA	NA	NA	NA	NA	NA	NA	NA	NA	NA	TRUE	FALSE	NA	NA	NA	NA	NA	NA	NA	NA	NA	NA	NA	0	1.0152	0	0	0	0.507602	Inf	0	0.0264736	0	0	0	0.0132368	Inf
CG11370	TRUE	FALSE	NA	NA	NA	NA	NA	NA	NA	NA	NA	NA	TRUE	FALSE	NA	NA	NA	NA	NA	NA	NA	NA	NA	NA	NA	0	4.08828	0	0	0	2.04414	Inf	0	0.217614	0	0	0	0.108807	Inf
CG11384	TRUE	FALSE	NA	NA	NA	NA	NA	NA	NA	NA	NA	NA	TRUE	FALSE	NA	NA	NA	NA	NA	NA	NA	NA	NA	NA	NA	0	2.03041	0	1.8506	0	1.94051	Inf	0	0.0615646	0	0.0560456	0	0.0588051	Inf
CG11406	TRUE	FALSE	NA	NA	NA	NA	NA	NA	NA	NA	NA	NA	TRUE	FALSE	NA	NA	NA	NA	NA	NA	NA	NA	NA	NA	NA	0	0.656367	0	1.19648	0	0.926425	Inf	0	0.0142598	0	0.0259629	0	0.0201114	Inf
CG11453	TRUE	FALSE	NA	NA	NA	NA	NA	NA	NA	NA	NA	NA	TRUE	FALSE	NA	NA	NA	NA	NA	NA	NA	NA	NA	NA	NA	0	2.03041	0	3.7012	0	2.86581	Inf	0	0.0739379	0	0.134619	0	0.104279	Inf
CG11470	TRUE	FALSE	NA	NA	NA	NA	NA	NA	NA	NA	NA	NA	TRUE	FALSE	NA	NA	NA	NA	NA	NA	NA	NA	NA	NA	NA	0	3.16963	0	0	0	1.58482	Inf	0	0.342806	0	0	0	0.171403	Inf
CG11581	TRUE	FALSE	NA	NA	NA	NA	NA	NA	NA	NA	NA	NA	TRUE	FALSE	NA	NA	NA	NA	NA	NA	NA	NA	NA	NA	NA	0	0.848665	0	0	0	0.424332	Inf	0	0.0451935	0	0	0	0.0225968	Inf
CG11588	TRUE	FALSE	NA	NA	NA	NA	NA	NA	NA	NA	NA	NA	TRUE	FALSE	NA	NA	NA	NA	NA	NA	NA	NA	NA	NA	NA	0	1.08847	0	0	0	0.544234	Inf	0	0.0777494	0	0	0	0.0388747	Inf
CG11600	TRUE	FALSE	NA	NA	NA	NA	NA	NA	NA	NA	NA	NA	TRUE	FALSE	NA	NA	NA	NA	NA	NA	NA	NA	NA	NA	NA	0	0	0	0.925301	0	0.46265	Inf	0	0	0	0.048563	0	0.0242815	Inf
CG11629	TRUE	FALSE	NA	NA	NA	NA	NA	NA	NA	NA	NA	NA	TRUE	FALSE	NA	NA	NA	NA	NA	NA	NA	NA	NA	NA	NA	0	2.03041	0	1.8506	0	1.94051	Inf	0	0.0846784	0	0.0770873	0	0.0808829	Inf
CG11635	TRUE	FALSE	NA	NA	NA	NA	NA	NA	NA	NA	NA	NA	TRUE	FALSE	NA	NA	NA	NA	NA	NA	NA	NA	NA	NA	NA	0	1.0152	0	0	0	0.507602	Inf	0	0.081975	0	0	0	0.0409875	Inf
CG11668	TRUE	FALSE	NA	NA	NA	NA	NA	NA	NA	NA	NA	NA	TRUE	FALSE	NA	NA	NA	NA	NA	NA	NA	NA	NA	NA	NA	0	1.0152	0	0.925301	0	0.970253	Inf	0	0.0524638	0	0.0477607	0	0.0501123	Inf
CG11703	TRUE	FALSE	NA	NA	NA	NA	NA	NA	NA	NA	NA	NA	TRUE	FALSE	NA	NA	NA	NA	NA	NA	NA	NA	NA	NA	NA	0	0	0	0.925301	0	0.46265	Inf	0	0	0	0.0509034	0	0.0254517	Inf
CG11741	TRUE	FALSE	NA	NA	NA	NA	NA	NA	NA	NA	NA	NA	TRUE	FALSE	NA	NA	NA	NA	NA	NA	NA	NA	NA	NA	NA	0	0	0	1.21633	0	0.608167	Inf	0	0	0	0.34952	0	0.17476	Inf
CG11756	TRUE	FALSE	NA	NA	NA	NA	NA	NA	NA	NA	NA	NA	TRUE	FALSE	NA	NA	NA	NA	NA	NA	NA	NA	NA	NA	NA	0	2.03041	0	2.7759	0	2.40316	Inf	0	0.220599	0	0.301235	0	0.260917	Inf
CG11762	TRUE	FALSE	NA	NA	NA	NA	NA	NA	NA	NA	NA	NA	TRUE	FALSE	NA	NA	NA	NA	NA	NA	NA	NA	NA	NA	NA	0	3.04561	0	7.40241	0	5.22401	Inf	0	0.192145	0	0.466453	0	0.329299	Inf
CG11796	TRUE	FALSE	NA	NA	NA	NA	NA	NA	NA	NA	NA	NA	TRUE	FALSE	NA	NA	NA	NA	NA	NA	NA	NA	NA	NA	NA	0	0	0	2.03281	0	1.0164	Inf	0	0	0	0.099682	0	0.049841	Inf
CG11828	TRUE	FALSE	NA	NA	NA	NA	NA	NA	NA	NA	NA	NA	TRUE	FALSE	NA	NA	NA	NA	NA	NA	NA	NA	NA	NA	NA	0	0	0	0.925301	0	0.46265	Inf	0	0	0	0.0404751	0	0.0202376	Inf
CG11854	TRUE	FALSE	NA	NA	NA	NA	NA	NA	NA	NA	NA	NA	TRUE	FALSE	NA	NA	NA	NA	NA	NA	NA	NA	NA	NA	NA	0	1.0152	0	0	0	0.507602	Inf	0	0.0718256	0	0	0	0.0359128	Inf
CG11891	TRUE	FALSE	NA	NA	NA	NA	NA	NA	NA	NA	NA	NA	TRUE	FALSE	NA	NA	NA	NA	NA	NA	NA	NA	NA	NA	NA	0	0	0	14.1269	0	7.06345	Inf	0	0	0	0.434372	0	0.217186	Inf
CG11898	TRUE	FALSE	NA	NA	NA	NA	NA	NA	NA	NA	NA	NA	TRUE	FALSE	NA	NA	NA	NA	NA	NA	NA	NA	NA	NA	NA	0	1.0152	0	0.925301	0	0.970253	Inf	0	0.0141196	0	0.0128539	0	0.0134867	Inf
CG11929	TRUE	FALSE	NA	NA	NA	NA	NA	NA	NA	NA	NA	NA	TRUE	FALSE	NA	NA	NA	NA	NA	NA	NA	NA	NA	NA	NA	0	1.01551	0	0	0	0.507757	Inf	0	0.0212993	0	0	0	0.0106497	Inf
CG12003	TRUE	FALSE	NA	NA	NA	NA	NA	NA	NA	NA	NA	NA	TRUE	FALSE	NA	NA	NA	NA	NA	NA	NA	NA	NA	NA	NA	0	1.0152	0	0	0	0.507602	Inf	0	0.0375207	0	0	0	0.0187604	Inf
CG12011	TRUE	FALSE	NA	NA	NA	NA	NA	NA	NA	NA	NA	NA	TRUE	FALSE	NA	NA	NA	NA	NA	NA	NA	NA	NA	NA	NA	0	0	0	0.925301	0	0.46265	Inf	0	0	0	0.0360162	0	0.0180081	Inf
CG12027	TRUE	FALSE	NA	NA	NA	NA	NA	NA	NA	NA	NA	NA	TRUE	FALSE	NA	NA	NA	NA	NA	NA	NA	NA	NA	NA	NA	0	1.0152	0	0	0	0.507602	Inf	0	0.138381	0	0	0	0.0691903	Inf
CG12133	TRUE	FALSE	NA	NA	NA	NA	NA	NA	NA	NA	NA	NA	TRUE	FALSE	NA	NA	NA	NA	NA	NA	NA	NA	NA	NA	NA	0	0	0	0.925301	0	0.46265	Inf	0	0	0	0.0613686	0	0.0306843	Inf
CG12256	TRUE	FALSE	NA	NA	NA	NA	NA	NA	NA	NA	NA	NA	TRUE	FALSE	NA	NA	NA	NA	NA	NA	NA	NA	NA	NA	NA	0	0	0	0.925301	0	0.46265	Inf	0	0	0	0.0746263	0	0.0373132	Inf
CG12362	TRUE	FALSE	NA	NA	NA	NA	NA	NA	NA	NA	NA	NA	TRUE	FALSE	NA	NA	NA	NA	NA	NA	NA	NA	NA	NA	NA	0	1.03314	0	0	0	0.516571	Inf	0	0.035532	0	0	0	0.017766	Inf
CG12477	TRUE	FALSE	NA	NA	NA	NA	NA	NA	NA	NA	NA	NA	TRUE	FALSE	NA	NA	NA	NA	NA	NA	NA	NA	NA	NA	NA	0	2.03041	0	0	0	1.0152	Inf	0	0.107164	0	0	0	0.0535821	Inf
CG12490	TRUE	FALSE	NA	NA	NA	NA	NA	NA	NA	NA	NA	NA	TRUE	FALSE	NA	NA	NA	NA	NA	NA	NA	NA	NA	NA	NA	0	1.0152	0	0	0	0.507602	Inf	0	0.0416667	0	0	0	0.0208333	Inf
CG12540	TRUE	FALSE	NA	NA	NA	NA	NA	NA	NA	NA	NA	NA	TRUE	FALSE	NA	NA	NA	NA	NA	NA	NA	NA	NA	NA	NA	0	2.03041	0	0	0	1.0152	Inf	0	0.210589	0	0	0	0.105294	Inf
CG12589	TRUE	FALSE	NA	NA	NA	NA	NA	NA	NA	NA	NA	NA	TRUE	FALSE	NA	NA	NA	NA	NA	NA	NA	NA	NA	NA	NA	0	0	0	0.364385	0	0.182193	Inf	0	0	0	0.0680182	0	0.0340091	Inf
CG12605	TRUE	FALSE	NA	NA	NA	NA	NA	NA	NA	NA	NA	NA	TRUE	FALSE	NA	NA	NA	NA	NA	NA	NA	NA	NA	NA	NA	0	2.03041	0	2.7759	0	2.40316	Inf	0	0.0408762	0	0.0558177	0	0.0483469	Inf
CG12645	TRUE	FALSE	NA	NA	NA	NA	NA	NA	NA	NA	NA	NA	TRUE	FALSE	NA	NA	NA	NA	NA	NA	NA	NA	NA	NA	NA	0	1.022	0	0	0	0.511002	Inf	0	0.0673365	0	0	0	0.0336682	Inf
CG12692	TRUE	FALSE	NA	NA	NA	NA	NA	NA	NA	NA	NA	NA	TRUE	FALSE	NA	NA	NA	NA	NA	NA	NA	NA	NA	NA	NA	0	1.02558	0	0	0	0.512791	Inf	0	0.0352414	0	0	0	0.0176207	Inf
CG12725	TRUE	FALSE	NA	NA	NA	NA	NA	NA	NA	NA	NA	NA	TRUE	FALSE	NA	NA	NA	NA	NA	NA	NA	NA	NA	NA	NA	0	2.03041	0	0	0	1.0152	Inf	0	0.146086	0	0	0	0.073043	Inf
CG12826	TRUE	FALSE	NA	NA	NA	NA	NA	NA	NA	NA	NA	NA	TRUE	FALSE	NA	NA	NA	NA	NA	NA	NA	NA	NA	NA	NA	0	0	0	1.8506	0	0.925301	Inf	0	0	0	0.212066	0	0.106033	Inf
CG12910	TRUE	FALSE	NA	NA	NA	NA	NA	NA	NA	NA	NA	NA	TRUE	FALSE	NA	NA	NA	NA	NA	NA	NA	NA	NA	NA	NA	0	3.05122	0	1.2181	0	2.13466	Inf	0	0.120407	0	0.048011	0	0.084209	Inf
CG12914	TRUE	FALSE	NA	NA	NA	NA	NA	NA	NA	NA	NA	NA	TRUE	FALSE	NA	NA	NA	NA	NA	NA	NA	NA	NA	NA	NA	0	1.02791	0	0	0	0.513954	Inf	0	0.0580688	0	0	0	0.0290344	Inf
CG12934	TRUE	FALSE	NA	NA	NA	NA	NA	NA	NA	NA	NA	NA	TRUE	FALSE	NA	NA	NA	NA	NA	NA	NA	NA	NA	NA	NA	0	1.08068	0	2.95493	0	2.0178	Inf	0	0.0915533	0	0.250038	0	0.170796	Inf
CG1299	TRUE	FALSE	NA	NA	NA	NA	NA	NA	NA	NA	NA	NA	TRUE	FALSE	NA	NA	NA	NA	NA	NA	NA	NA	NA	NA	NA	0	2.16599	0	0	0	1.08299	Inf	0	0.0778494	0	0	0	0.0389247	Inf
CG12998	TRUE	FALSE	NA	NA	NA	NA	NA	NA	NA	NA	NA	NA	TRUE	FALSE	NA	NA	NA	NA	NA	NA	NA	NA	NA	NA	NA	0	0	0	1.4955	0	0.747751	Inf	0	0	0	0.132991	0	0.0664956	Inf
CG13073	TRUE	FALSE	NA	NA	NA	NA	NA	NA	NA	NA	NA	NA	TRUE	FALSE	NA	NA	NA	NA	NA	NA	NA	NA	NA	NA	NA	0	1.0152	0	0.925301	0	0.970253	Inf	0	0.0463746	0	0.0422173	0	0.044296	Inf
CG13074	TRUE	FALSE	NA	NA	NA	NA	NA	NA	NA	NA	NA	NA	TRUE	FALSE	NA	NA	NA	NA	NA	NA	NA	NA	NA	NA	NA	0	0	0	1.8506	0	0.925301	Inf	0	0	0	0.0823459	0	0.041173	Inf
CG13075	TRUE	FALSE	NA	NA	NA	NA	NA	NA	NA	NA	NA	NA	TRUE	FALSE	NA	NA	NA	NA	NA	NA	NA	NA	NA	NA	NA	0	1.0152	0	3.7012	0	2.3582	Inf	0	0.0635089	0	0.231263	0	0.147386	Inf
CG13077	TRUE	FALSE	NA	NA	NA	NA	NA	NA	NA	NA	NA	NA	TRUE	FALSE	NA	NA	NA	NA	NA	NA	NA	NA	NA	NA	NA	0	0	0	1.1367	0	0.568349	Inf	0	0	0	0.0845	0	0.04225	Inf
CG13078	TRUE	FALSE	NA	NA	NA	NA	NA	NA	NA	NA	NA	NA	TRUE	FALSE	NA	NA	NA	NA	NA	NA	NA	NA	NA	NA	NA	0	1.0152	0	0	0	0.507602	Inf	0	0.0848574	0	0	0	0.0424287	Inf
CG13086	TRUE	FALSE	NA	NA	NA	NA	NA	NA	NA	NA	NA	NA	TRUE	FALSE	NA	NA	NA	NA	NA	NA	NA	NA	NA	NA	NA	0	0.864266	0	0	0	0.432133	Inf	0	0.12288	0	0	0	0.0614398	Inf
CG1314	TRUE	FALSE	NA	NA	NA	NA	NA	NA	NA	NA	NA	NA	TRUE	FALSE	NA	NA	NA	NA	NA	NA	NA	NA	NA	NA	NA	0	1.0152	0	0	0	0.507602	Inf	0	0.0498623	0	0	0	0.0249312	Inf
CG1315	TRUE	FALSE	NA	NA	NA	NA	NA	NA	NA	NA	NA	NA	TRUE	FALSE	NA	NA	NA	NA	NA	NA	NA	NA	NA	NA	NA	0	3.10477	0	9.43272	0	6.26874	Inf	0	0.149587	0	0.453924	0	0.301755	Inf
CG13168	TRUE	FALSE	NA	NA	NA	NA	NA	NA	NA	NA	NA	NA	TRUE	FALSE	NA	NA	NA	NA	NA	NA	NA	NA	NA	NA	NA	0	0	0	0.9358	0	0.4679	Inf	0	0	0	0.0415467	0	0.0207734	Inf
CG13178	TRUE	FALSE	NA	NA	NA	NA	NA	NA	NA	NA	NA	NA	TRUE	FALSE	NA	NA	NA	NA	NA	NA	NA	NA	NA	NA	NA	0	1.0152	0	3.7012	0	2.3582	Inf	0	0.0611281	0	0.222593	0	0.141861	Inf
CG13183	TRUE	FALSE	NA	NA	NA	NA	NA	NA	NA	NA	NA	NA	TRUE	FALSE	NA	NA	NA	NA	NA	NA	NA	NA	NA	NA	NA	0	1.0152	0	0	0	0.507602	Inf	0	0.0299867	0	0	0	0.0149934	Inf
CG13198	TRUE	FALSE	NA	NA	NA	NA	NA	NA	NA	NA	NA	NA	TRUE	FALSE	NA	NA	NA	NA	NA	NA	NA	NA	NA	NA	NA	0	1.0152	0	1.8506	0	1.4329	Inf	0	0.17539	0	0.319334	0	0.247362	Inf
CG1324	TRUE	FALSE	NA	NA	NA	NA	NA	NA	NA	NA	NA	NA	TRUE	FALSE	NA	NA	NA	NA	NA	NA	NA	NA	NA	NA	NA	0	0	0	1.06531	0	0.532654	Inf	0	0	0	0.0575129	0	0.0287565	Inf
CG13245	TRUE	FALSE	NA	NA	NA	NA	NA	NA	NA	NA	NA	NA	TRUE	FALSE	NA	NA	NA	NA	NA	NA	NA	NA	NA	NA	NA	0	0	0	0.46265	0	0.231325	Inf	0	0	0	0.0450205	0	0.0225103	Inf
CG13250	TRUE	FALSE	NA	NA	NA	NA	NA	NA	NA	NA	NA	NA	TRUE	FALSE	NA	NA	NA	NA	NA	NA	NA	NA	NA	NA	NA	0	0	0	2.11319	0	1.0566	Inf	0	0	0	0.371119	0	0.18556	Inf
CG13251	TRUE	FALSE	NA	NA	NA	NA	NA	NA	NA	NA	NA	NA	TRUE	FALSE	NA	NA	NA	NA	NA	NA	NA	NA	NA	NA	NA	0	1.0152	0	0	0	0.507602	Inf	0	0.018772	0	0	0	0.009386	Inf
CG13287	TRUE	FALSE	NA	NA	NA	NA	NA	NA	NA	NA	NA	NA	TRUE	FALSE	NA	NA	NA	NA	NA	NA	NA	NA	NA	NA	NA	0	1.0152	0	0.925301	0	0.970253	Inf	0	0.0379933	0	0.0345873	0	0.0362903	Inf
CG13324	TRUE	FALSE	NA	NA	NA	NA	NA	NA	NA	NA	NA	NA	TRUE	FALSE	NA	NA	NA	NA	NA	NA	NA	NA	NA	NA	NA	0	0	0	3.7012	0	1.8506	Inf	0	0	0	0.704175	0	0.352087	Inf
CG13325	TRUE	FALSE	NA	NA	NA	NA	NA	NA	NA	NA	NA	NA	TRUE	FALSE	NA	NA	NA	NA	NA	NA	NA	NA	NA	NA	NA	0	0	0	13.8627	0	6.93136	Inf	0	0	0	0.332541	0	0.16627	Inf
CG13334	TRUE	FALSE	NA	NA	NA	NA	NA	NA	NA	NA	NA	NA	TRUE	FALSE	NA	NA	NA	NA	NA	NA	NA	NA	NA	NA	NA	0	0.849012	0	0.773825	0	0.811418	Inf	0	0.0297942	0	0.0271233	0	0.0284587	Inf
CG13361	TRUE	FALSE	NA	NA	NA	NA	NA	NA	NA	NA	NA	NA	TRUE	FALSE	NA	NA	NA	NA	NA	NA	NA	NA	NA	NA	NA	0	0	0	1.8506	0	0.925301	Inf	0	0	0	0.0804169	0	0.0402084	Inf
CG13376	TRUE	FALSE	NA	NA	NA	NA	NA	NA	NA	NA	NA	NA	TRUE	FALSE	NA	NA	NA	NA	NA	NA	NA	NA	NA	NA	NA	0	0	0	0.9253	0	0.46265	Inf	0	0	0	0.0554796	0	0.0277398	Inf
CG13386	TRUE	FALSE	NA	NA	NA	NA	NA	NA	NA	NA	NA	NA	TRUE	FALSE	NA	NA	NA	NA	NA	NA	NA	NA	NA	NA	NA	0	0	0	0.925301	0	0.46265	Inf	0	0	0	0.0699681	0	0.034984	Inf
CG13423	TRUE	FALSE	NA	NA	NA	NA	NA	NA	NA	NA	NA	NA	TRUE	FALSE	NA	NA	NA	NA	NA	NA	NA	NA	NA	NA	NA	0	0	0	0.925301	0	0.46265	Inf	0	0	0	0.0384897	0	0.0192448	Inf
CG13437	TRUE	FALSE	NA	NA	NA	NA	NA	NA	NA	NA	NA	NA	TRUE	FALSE	NA	NA	NA	NA	NA	NA	NA	NA	NA	NA	NA	0	0	0	0.925301	0	0.46265	Inf	0	0	0	0.0942111	0	0.0471056	Inf
CG13449	TRUE	FALSE	NA	NA	NA	NA	NA	NA	NA	NA	NA	NA	TRUE	FALSE	NA	NA	NA	NA	NA	NA	NA	NA	NA	NA	NA	0	1.55322	0	0	0	0.776608	Inf	0	0.0785593	0	0	0	0.0392797	Inf
CG13455	TRUE	FALSE	NA	NA	NA	NA	NA	NA	NA	NA	NA	NA	TRUE	FALSE	NA	NA	NA	NA	NA	NA	NA	NA	NA	NA	NA	0	1.0152	0	0	0	0.507602	Inf	0	0.0496571	0	0	0	0.0248286	Inf
CG13458	TRUE	FALSE	NA	NA	NA	NA	NA	NA	NA	NA	NA	NA	TRUE	FALSE	NA	NA	NA	NA	NA	NA	NA	NA	NA	NA	NA	0	3.04561	0	0.925301	0	1.98546	Inf	0	0.0910004	0	0.0276142	0	0.0593073	Inf
CG13465	TRUE	FALSE	NA	NA	NA	NA	NA	NA	NA	NA	NA	NA	TRUE	FALSE	NA	NA	NA	NA	NA	NA	NA	NA	NA	NA	NA	0	2.03041	0	0.925301	0	1.47786	Inf	0	0.299424	0	0.136291	0	0.217858	Inf
CG13476	TRUE	FALSE	NA	NA	NA	NA	NA	NA	NA	NA	NA	NA	TRUE	FALSE	NA	NA	NA	NA	NA	NA	NA	NA	NA	NA	NA	0	1.0152	0	0	0	0.507602	Inf	0	0.121887	0	0	0	0.0609433	Inf
CG13492	TRUE	FALSE	NA	NA	NA	NA	NA	NA	NA	NA	NA	NA	TRUE	FALSE	NA	NA	NA	NA	NA	NA	NA	NA	NA	NA	NA	0	0	0	82.3518	0	41.1759	Inf	0	0	0	0.54411	0	0.272055	Inf
CG13501	TRUE	FALSE	NA	NA	NA	NA	NA	NA	NA	NA	NA	NA	TRUE	FALSE	NA	NA	NA	NA	NA	NA	NA	NA	NA	NA	NA	0	1.03244	0	0.941012	0	0.986728	Inf	0	0.0435935	0	0.0396855	0	0.0416395	Inf
CG13561	TRUE	FALSE	NA	NA	NA	NA	NA	NA	NA	NA	NA	NA	TRUE	FALSE	NA	NA	NA	NA	NA	NA	NA	NA	NA	NA	NA	0	1.0152	0	0	0	0.507602	Inf	0	0.18173	0	0	0	0.0908648	Inf
CG13577	TRUE	FALSE	NA	NA	NA	NA	NA	NA	NA	NA	NA	NA	TRUE	FALSE	NA	NA	NA	NA	NA	NA	NA	NA	NA	NA	NA	0	0.739883	0	1.47368	0	1.10678	Inf	0	0.0390507	0	0.0776874	0	0.058369	Inf
CG13611	TRUE	FALSE	NA	NA	NA	NA	NA	NA	NA	NA	NA	NA	TRUE	FALSE	NA	NA	NA	NA	NA	NA	NA	NA	NA	NA	NA	0	1.0152	0	0	0	0.507602	Inf	0	0.0447245	0	0	0	0.0223623	Inf
CG13617	TRUE	FALSE	NA	NA	NA	NA	NA	NA	NA	NA	NA	NA	TRUE	FALSE	NA	NA	NA	NA	NA	NA	NA	NA	NA	NA	NA	0	0	0	0.990429	0	0.495215	Inf	0	0	0	0.0258591	0	0.0129295	Inf
CG13643	TRUE	FALSE	NA	NA	NA	NA	NA	NA	NA	NA	NA	NA	TRUE	FALSE	NA	NA	NA	NA	NA	NA	NA	NA	NA	NA	NA	0	9.20172	0	1.83913	0	5.52043	Inf	0	0.18942	0	0.0378138	0	0.113617	Inf
CG13679	TRUE	FALSE	NA	NA	NA	NA	NA	NA	NA	NA	NA	NA	TRUE	FALSE	NA	NA	NA	NA	NA	NA	NA	NA	NA	NA	NA	0	0	0	2.7759	0	1.38795	Inf	0	0	0	0.568197	0	0.284098	Inf
CG13692	TRUE	FALSE	NA	NA	NA	NA	NA	NA	NA	NA	NA	NA	TRUE	FALSE	NA	NA	NA	NA	NA	NA	NA	NA	NA	NA	NA	0	2.03041	0	0.925301	0	1.47786	Inf	0	0.258944	0	0.117865	0	0.188405	Inf
CG13731	TRUE	FALSE	NA	NA	NA	NA	NA	NA	NA	NA	NA	NA	TRUE	FALSE	NA	NA	NA	NA	NA	NA	NA	NA	NA	NA	NA	0	1.0152	0	0	0	0.507602	Inf	0	0.0216948	0	0	0	0.0108474	Inf
CG13829	TRUE	FALSE	NA	NA	NA	NA	NA	NA	NA	NA	NA	NA	TRUE	FALSE	NA	NA	NA	NA	NA	NA	NA	NA	NA	NA	NA	0	1.0152	0	1.8506	0	1.4329	Inf	0	0.0987458	0	0.179787	0	0.139267	Inf
CG13856	TRUE	FALSE	NA	NA	NA	NA	NA	NA	NA	NA	NA	NA	TRUE	FALSE	NA	NA	NA	NA	NA	NA	NA	NA	NA	NA	NA	0	1.0152	0	0	0	0.507602	Inf	0	0.0810935	0	0	0	0.0405468	Inf
CG1387	TRUE	FALSE	NA	NA	NA	NA	NA	NA	NA	NA	NA	NA	TRUE	FALSE	NA	NA	NA	NA	NA	NA	NA	NA	NA	NA	NA	0	2.03041	0	0	0	1.0152	Inf	0	0.0373927	0	0	0	0.0186964	Inf
CG13872	TRUE	FALSE	NA	NA	NA	NA	NA	NA	NA	NA	NA	NA	TRUE	FALSE	NA	NA	NA	NA	NA	NA	NA	NA	NA	NA	NA	0	1.0152	0	0	0	0.507602	Inf	0	0.0333149	0	0	0	0.0166574	Inf
CG13947	TRUE	FALSE	NA	NA	NA	NA	NA	NA	NA	NA	NA	NA	TRUE	FALSE	NA	NA	NA	NA	NA	NA	NA	NA	NA	NA	NA	0	0	0	3.7012	0	1.8506	Inf	0	0	0	0.773602	0	0.386801	Inf
CG13949	TRUE	FALSE	NA	NA	NA	NA	NA	NA	NA	NA	NA	NA	TRUE	FALSE	NA	NA	NA	NA	NA	NA	NA	NA	NA	NA	NA	0	0	0	2.40538	0	1.20269	Inf	0	0	0	0.245751	0	0.122875	Inf
CG13983	TRUE	FALSE	NA	NA	NA	NA	NA	NA	NA	NA	NA	NA	TRUE	FALSE	NA	NA	NA	NA	NA	NA	NA	NA	NA	NA	NA	0	1.0152	0	0	0	0.507602	Inf	0	0.0889877	0	0	0	0.0444938	Inf
CG13984	TRUE	FALSE	NA	NA	NA	NA	NA	NA	NA	NA	NA	NA	TRUE	FALSE	NA	NA	NA	NA	NA	NA	NA	NA	NA	NA	NA	0	0	0	0.925301	0	0.46265	Inf	0	0	0	0.119924	0	0.0599621	Inf
CG1402	TRUE	FALSE	NA	NA	NA	NA	NA	NA	NA	NA	NA	NA	TRUE	FALSE	NA	NA	NA	NA	NA	NA	NA	NA	NA	NA	NA	0	0	0	0.674342	0	0.337171	Inf	0	0	0	0.0149414	0	0.0074707	Inf
CG14024	TRUE	FALSE	NA	NA	NA	NA	NA	NA	NA	NA	NA	NA	TRUE	FALSE	NA	NA	NA	NA	NA	NA	NA	NA	NA	NA	NA	0	1.27488	0	0	0	0.63744	Inf	0	0.0377319	0	0	0	0.018866	Inf
CG14042	TRUE	FALSE	NA	NA	NA	NA	NA	NA	NA	NA	NA	NA	TRUE	FALSE	NA	NA	NA	NA	NA	NA	NA	NA	NA	NA	NA	0	4.8659	0	0	0	2.43295	Inf	0	0.117266	0	0	0	0.0586331	Inf
CG14054	TRUE	FALSE	NA	NA	NA	NA	NA	NA	NA	NA	NA	NA	TRUE	FALSE	NA	NA	NA	NA	NA	NA	NA	NA	NA	NA	NA	0	2.03041	0	2.7759	0	2.40316	Inf	0	0.167361	0	0.228537	0	0.197949	Inf
CG14096	TRUE	FALSE	NA	NA	NA	NA	NA	NA	NA	NA	NA	NA	TRUE	FALSE	NA	NA	NA	NA	NA	NA	NA	NA	NA	NA	NA	0	1.0152	0	0	0	0.507602	Inf	0	0.232952	0	0	0	0.116476	Inf
CG14120	TRUE	FALSE	NA	NA	NA	NA	NA	NA	NA	NA	NA	NA	TRUE	FALSE	NA	NA	NA	NA	NA	NA	NA	NA	NA	NA	NA	0	0	0	4.6265	0	2.31325	Inf	0	0	0	0.0685358	0	0.0342679	Inf
CG14128	TRUE	FALSE	NA	NA	NA	NA	NA	NA	NA	NA	NA	NA	TRUE	FALSE	NA	NA	NA	NA	NA	NA	NA	NA	NA	NA	NA	0	2.02862	0	0.954778	0	1.4917	Inf	0	0.0708969	0	0.0333281	0	0.0521125	Inf
CG14143	TRUE	FALSE	NA	NA	NA	NA	NA	NA	NA	NA	NA	NA	TRUE	FALSE	NA	NA	NA	NA	NA	NA	NA	NA	NA	NA	NA	0	1.0152	0	0	0	0.507602	Inf	0	0.204523	0	0	0	0.102262	Inf
CG14153	TRUE	FALSE	NA	NA	NA	NA	NA	NA	NA	NA	NA	NA	TRUE	FALSE	NA	NA	NA	NA	NA	NA	NA	NA	NA	NA	NA	0	1.0152	0	1.8506	0	1.4329	Inf	0	0.0733093	0	0.133475	0	0.103392	Inf
CG14154	TRUE	FALSE	NA	NA	NA	NA	NA	NA	NA	NA	NA	NA	TRUE	FALSE	NA	NA	NA	NA	NA	NA	NA	NA	NA	NA	NA	0	0	0	0.966467	0	0.483233	Inf	0	0	0	0.0729415	0	0.0364708	Inf
CG14160	TRUE	FALSE	NA	NA	NA	NA	NA	NA	NA	NA	NA	NA	TRUE	FALSE	NA	NA	NA	NA	NA	NA	NA	NA	NA	NA	NA	0	0	0	4.6265	0	2.31325	Inf	0	0	0	0.143556	0	0.0717782	Inf
CG14195	TRUE	FALSE	NA	NA	NA	NA	NA	NA	NA	NA	NA	NA	TRUE	FALSE	NA	NA	NA	NA	NA	NA	NA	NA	NA	NA	NA	0	1.16638	0	0	0	0.583189	Inf	0	0.0313582	0	0	0	0.0156791	Inf
CG14205	TRUE	FALSE	NA	NA	NA	NA	NA	NA	NA	NA	NA	NA	TRUE	FALSE	NA	NA	NA	NA	NA	NA	NA	NA	NA	NA	NA	0	1.0152	0	0	0	0.507602	Inf	0	0.0282063	0	0	0	0.0141031	Inf
CG1421	TRUE	FALSE	NA	NA	NA	NA	NA	NA	NA	NA	NA	NA	TRUE	FALSE	NA	NA	NA	NA	NA	NA	NA	NA	NA	NA	NA	0	0	0	0.925301	0	0.46265	Inf	0	0	0	0.100228	0	0.0501142	Inf
CG14282	TRUE	FALSE	NA	NA	NA	NA	NA	NA	NA	NA	NA	NA	TRUE	FALSE	NA	NA	NA	NA	NA	NA	NA	NA	NA	NA	NA	0	1.0152	0	1.8506	0	1.4329	Inf	0	0.0765654	0	0.139403	0	0.107984	Inf
CG14312	TRUE	FALSE	NA	NA	NA	NA	NA	NA	NA	NA	NA	NA	TRUE	FALSE	NA	NA	NA	NA	NA	NA	NA	NA	NA	NA	NA	0	1.0152	0	0	0	0.507602	Inf	0	0.204523	0	0	0	0.102262	Inf
CG14313	TRUE	FALSE	NA	NA	NA	NA	NA	NA	NA	NA	NA	NA	TRUE	FALSE	NA	NA	NA	NA	NA	NA	NA	NA	NA	NA	NA	0	0	0	0.925301	0	0.46265	Inf	0	0	0	0.121248	0	0.0606239	Inf
CG14321	TRUE	FALSE	NA	NA	NA	NA	NA	NA	NA	NA	NA	NA	TRUE	FALSE	NA	NA	NA	NA	NA	NA	NA	NA	NA	NA	NA	0	1.0152	0	3.7012	0	2.3582	Inf	0	0.119948	0	0.436781	0	0.278364	Inf
CG14329	TRUE	FALSE	NA	NA	NA	NA	NA	NA	NA	NA	NA	NA	TRUE	FALSE	NA	NA	NA	NA	NA	NA	NA	NA	NA	NA	NA	0	0	0	0.925301	0	0.46265	Inf	0	0	0	0.0607576	0	0.0303788	Inf
CG14421	TRUE	FALSE	NA	NA	NA	NA	NA	NA	NA	NA	NA	NA	TRUE	FALSE	NA	NA	NA	NA	NA	NA	NA	NA	NA	NA	NA	0	0	0	1.8506	0	0.925301	Inf	0	0	0	0.16874	0	0.0843702	Inf
CG14445	TRUE	FALSE	NA	NA	NA	NA	NA	NA	NA	NA	NA	NA	TRUE	FALSE	NA	NA	NA	NA	NA	NA	NA	NA	NA	NA	NA	0	4.33174	0	0.987034	0	2.65939	Inf	0	0.178898	0	0.0407152	0	0.109807	Inf
CG14457	TRUE	FALSE	NA	NA	NA	NA	NA	NA	NA	NA	NA	NA	TRUE	FALSE	NA	NA	NA	NA	NA	NA	NA	NA	NA	NA	NA	0	0	0	1.85549	0	0.927743	Inf	0	0	0	0.100218	0	0.050109	Inf
CG14491	TRUE	FALSE	NA	NA	NA	NA	NA	NA	NA	NA	NA	NA	TRUE	FALSE	NA	NA	NA	NA	NA	NA	NA	NA	NA	NA	NA	0	0	0	0.925301	0	0.46265	Inf	0	0	0	0.181873	0	0.0909365	Inf
CG14499	TRUE	FALSE	NA	NA	NA	NA	NA	NA	NA	NA	NA	NA	TRUE	FALSE	NA	NA	NA	NA	NA	NA	NA	NA	NA	NA	NA	0	0	0	2.7759	0	1.38795	Inf	0	0	0	0.446548	0	0.223274	Inf
CG14500	TRUE	FALSE	NA	NA	NA	NA	NA	NA	NA	NA	NA	NA	TRUE	FALSE	NA	NA	NA	NA	NA	NA	NA	NA	NA	NA	NA	0	0	0	37.012	0	18.506	Inf	0	0	0	4.59625	0	2.29813	Inf
CG14527	TRUE	FALSE	NA	NA	NA	NA	NA	NA	NA	NA	NA	NA	TRUE	FALSE	NA	NA	NA	NA	NA	NA	NA	NA	NA	NA	NA	0	1.0785	0	1.005	0	1.04175	Inf	0	0.0327852	0	0.0305144	0	0.0316498	Inf
CG14537	TRUE	FALSE	NA	NA	NA	NA	NA	NA	NA	NA	NA	NA	TRUE	FALSE	NA	NA	NA	NA	NA	NA	NA	NA	NA	NA	NA	0	2.03041	0	0	0	1.0152	Inf	0	0.197169	0	0	0	0.0985845	Inf
CG14551	TRUE	FALSE	NA	NA	NA	NA	NA	NA	NA	NA	NA	NA	TRUE	FALSE	NA	NA	NA	NA	NA	NA	NA	NA	NA	NA	NA	0	0	0	1.70008	0	0.850038	Inf	0	0	0	0.119144	0	0.0595719	Inf
CG14579	TRUE	FALSE	NA	NA	NA	NA	NA	NA	NA	NA	NA	NA	TRUE	FALSE	NA	NA	NA	NA	NA	NA	NA	NA	NA	NA	NA	0	0	0	0.925301	0	0.46265	Inf	0	0	0	0.0573927	0	0.0286964	Inf
CG14598	TRUE	FALSE	NA	NA	NA	NA	NA	NA	NA	NA	NA	NA	TRUE	FALSE	NA	NA	NA	NA	NA	NA	NA	NA	NA	NA	NA	0	1.0152	0	0	0	0.507602	Inf	0	0.0585193	0	0	0	0.0292597	Inf
CG14610	TRUE	FALSE	NA	NA	NA	NA	NA	NA	NA	NA	NA	NA	TRUE	FALSE	NA	NA	NA	NA	NA	NA	NA	NA	NA	NA	NA	0	0	0	1.8506	0	0.925301	Inf	0	0	0	0.349845	0	0.174922	Inf
CG14645	TRUE	FALSE	NA	NA	NA	NA	NA	NA	NA	NA	NA	NA	TRUE	FALSE	NA	NA	NA	NA	NA	NA	NA	NA	NA	NA	NA	0	1.0152	0	0	0	0.507602	Inf	0	0.287305	0	0	0	0.143652	Inf
CG14742	TRUE	FALSE	NA	NA	NA	NA	NA	NA	NA	NA	NA	NA	TRUE	FALSE	NA	NA	NA	NA	NA	NA	NA	NA	NA	NA	NA	0	2.03041	0	0	0	1.0152	Inf	0	0.292174	0	0	0	0.146087	Inf
CG14744	TRUE	FALSE	NA	NA	NA	NA	NA	NA	NA	NA	NA	NA	TRUE	FALSE	NA	NA	NA	NA	NA	NA	NA	NA	NA	NA	NA	0	1.026	0	0	0	0.512998	Inf	0	0.0246661	0	0	0	0.012333	Inf
CG14763	TRUE	FALSE	NA	NA	NA	NA	NA	NA	NA	NA	NA	NA	TRUE	FALSE	NA	NA	NA	NA	NA	NA	NA	NA	NA	NA	NA	0	0	0	1.28521	0	0.642604	Inf	0	0	0	0.155375	0	0.0776874	Inf
CG14780	TRUE	FALSE	NA	NA	NA	NA	NA	NA	NA	NA	NA	NA	TRUE	FALSE	NA	NA	NA	NA	NA	NA	NA	NA	NA	NA	NA	0	2.03041	0	3.7012	0	2.86581	Inf	0	0.136656	0	0.24881	0	0.192733	Inf
CG14810	TRUE	FALSE	NA	NA	NA	NA	NA	NA	NA	NA	NA	NA	TRUE	FALSE	NA	NA	NA	NA	NA	NA	NA	NA	NA	NA	NA	0	0	0	0.927975	0	0.463988	Inf	0	0	0	0.106033	0	0.0530163	Inf
CG14838	TRUE	FALSE	NA	NA	NA	NA	NA	NA	NA	NA	NA	NA	TRUE	FALSE	NA	NA	NA	NA	NA	NA	NA	NA	NA	NA	NA	0	0	0	0.925301	0	0.46265	Inf	0	0	0	0.0165785	0	0.00828925	Inf
CG14841	TRUE	FALSE	NA	NA	NA	NA	NA	NA	NA	NA	NA	NA	TRUE	FALSE	NA	NA	NA	NA	NA	NA	NA	NA	NA	NA	NA	0	1.0152	0	0	0	0.507602	Inf	0	0.0797009	0	0	0	0.0398504	Inf
CG14852	TRUE	FALSE	NA	NA	NA	NA	NA	NA	NA	NA	NA	NA	TRUE	FALSE	NA	NA	NA	NA	NA	NA	NA	NA	NA	NA	NA	0	1.0152	0	0	0	0.507602	Inf	0	0.1555	0	0	0	0.0777501	Inf
CG14853	TRUE	FALSE	NA	NA	NA	NA	NA	NA	NA	NA	NA	NA	TRUE	FALSE	NA	NA	NA	NA	NA	NA	NA	NA	NA	NA	NA	0	0	0	1.00442	0	0.502208	Inf	0	0	0	0.0340302	0	0.0170151	Inf
CG14861	TRUE	FALSE	NA	NA	NA	NA	NA	NA	NA	NA	NA	NA	TRUE	FALSE	NA	NA	NA	NA	NA	NA	NA	NA	NA	NA	NA	0	0	0	0.925301	0	0.46265	Inf	0	0	0	0.0515242	0	0.0257621	Inf
CG14870	TRUE	FALSE	NA	NA	NA	NA	NA	NA	NA	NA	NA	NA	TRUE	FALSE	NA	NA	NA	NA	NA	NA	NA	NA	NA	NA	NA	0	0	0	1.8506	0	0.925301	Inf	0	0	0	0.16107	0	0.0805352	Inf
CG14963	TRUE	FALSE	NA	NA	NA	NA	NA	NA	NA	NA	NA	NA	TRUE	FALSE	NA	NA	NA	NA	NA	NA	NA	NA	NA	NA	NA	0	11.1673	0	2.7759	0	6.97158	Inf	0	0.905415	0	0.224795	0	0.565105	Inf
CG15005	TRUE	FALSE	NA	NA	NA	NA	NA	NA	NA	NA	NA	NA	TRUE	FALSE	NA	NA	NA	NA	NA	NA	NA	NA	NA	NA	NA	0	1.0152	0	0	0	0.507602	Inf	0	0.0246359	0	0	0	0.0123179	Inf
CG1504	TRUE	FALSE	NA	NA	NA	NA	NA	NA	NA	NA	NA	NA	TRUE	FALSE	NA	NA	NA	NA	NA	NA	NA	NA	NA	NA	NA	0	0.799323	0	0	0	0.399662	Inf	0	0.014875	0	0	0	0.00743752	Inf
CG15040	TRUE	FALSE	NA	NA	NA	NA	NA	NA	NA	NA	NA	NA	TRUE	FALSE	NA	NA	NA	NA	NA	NA	NA	NA	NA	NA	NA	0	3.04561	0	0.925301	0	1.98546	Inf	0	0.0304764	0	0.00924811	0	0.0198623	Inf
CG15043	TRUE	FALSE	NA	NA	NA	NA	NA	NA	NA	NA	NA	NA	TRUE	FALSE	NA	NA	NA	NA	NA	NA	NA	NA	NA	NA	NA	0	0	0	31.3781	0	15.689	Inf	0	0	0	3.10688	0	1.55344	Inf
CG15065	TRUE	FALSE	NA	NA	NA	NA	NA	NA	NA	NA	NA	NA	TRUE	FALSE	NA	NA	NA	NA	NA	NA	NA	NA	NA	NA	NA	0	0	0	0.925301	0	0.46265	Inf	0	0	0	1.14659	0	0.573296	Inf
CG15068	TRUE	FALSE	NA	NA	NA	NA	NA	NA	NA	NA	NA	NA	TRUE	FALSE	NA	NA	NA	NA	NA	NA	NA	NA	NA	NA	NA	0	1.0152	0	0.925301	0	0.970253	Inf	0	1.51423	0	1.37848	0	1.44636	Inf
CG15115	TRUE	FALSE	NA	NA	NA	NA	NA	NA	NA	NA	NA	NA	TRUE	FALSE	NA	NA	NA	NA	NA	NA	NA	NA	NA	NA	NA	0	0	0	0.925301	0	0.46265	Inf	0	0	0	0.0950261	0	0.0475131	Inf
CG15116	TRUE	FALSE	NA	NA	NA	NA	NA	NA	NA	NA	NA	NA	TRUE	FALSE	NA	NA	NA	NA	NA	NA	NA	NA	NA	NA	NA	0	2.03041	0	0	0	1.0152	Inf	0	0.273004	0	0	0	0.136502	Inf
CG15128	TRUE	FALSE	NA	NA	NA	NA	NA	NA	NA	NA	NA	NA	TRUE	FALSE	NA	NA	NA	NA	NA	NA	NA	NA	NA	NA	NA	0	0	0	0.925301	0	0.46265	Inf	0	0	0	0.0303116	0	0.0151558	Inf
CG15143	TRUE	FALSE	NA	NA	NA	NA	NA	NA	NA	NA	NA	NA	TRUE	FALSE	NA	NA	NA	NA	NA	NA	NA	NA	NA	NA	NA	0	2.03041	0	0	0	1.0152	Inf	0	0.0364111	0	0	0	0.0182055	Inf
CG15145	TRUE	FALSE	NA	NA	NA	NA	NA	NA	NA	NA	NA	NA	TRUE	FALSE	NA	NA	NA	NA	NA	NA	NA	NA	NA	NA	NA	0	1.0152	0	0	0	0.507602	Inf	0	0.0233127	0	0	0	0.0116563	Inf
CG15147	TRUE	FALSE	NA	NA	NA	NA	NA	NA	NA	NA	NA	NA	TRUE	FALSE	NA	NA	NA	NA	NA	NA	NA	NA	NA	NA	NA	0	1.0152	0	0	0	0.507602	Inf	0	0.138064	0	0	0	0.069032	Inf
CG15169	TRUE	FALSE	NA	NA	NA	NA	NA	NA	NA	NA	NA	NA	TRUE	FALSE	NA	NA	NA	NA	NA	NA	NA	NA	NA	NA	NA	0	1.0152	0	0	0	0.507602	Inf	0	0.0506578	0	0	0	0.0253289	Inf
CG15170	TRUE	FALSE	NA	NA	NA	NA	NA	NA	NA	NA	NA	NA	TRUE	FALSE	NA	NA	NA	NA	NA	NA	NA	NA	NA	NA	NA	0	1.01605	0	1.85212	0	1.43409	Inf	0	0.0397914	0	0.072448	0	0.0561197	Inf
CG15196	TRUE	FALSE	NA	NA	NA	NA	NA	NA	NA	NA	NA	NA	TRUE	FALSE	NA	NA	NA	NA	NA	NA	NA	NA	NA	NA	NA	0	2.03703	0	3.71327	0	2.87515	Inf	0	0.0875029	0	0.159317	0	0.12341	Inf
CG15213	TRUE	FALSE	NA	NA	NA	NA	NA	NA	NA	NA	NA	NA	TRUE	FALSE	NA	NA	NA	NA	NA	NA	NA	NA	NA	NA	NA	0	2.03041	0	0.925301	0	1.47786	Inf	0	0.722242	0	0.328748	0	0.525495	Inf
CG15233	TRUE	FALSE	NA	NA	NA	NA	NA	NA	NA	NA	NA	NA	TRUE	FALSE	NA	NA	NA	NA	NA	NA	NA	NA	NA	NA	NA	0	3.04561	0	2.7759	0	2.91076	Inf	0	0.290531	0	0.264487	0	0.277509	Inf
CG15254	TRUE	FALSE	NA	NA	NA	NA	NA	NA	NA	NA	NA	NA	TRUE	FALSE	NA	NA	NA	NA	NA	NA	NA	NA	NA	NA	NA	0	1.05007	0	0	0	0.525036	Inf	0	0.0963797	0	0	0	0.0481898	Inf
CG15255	TRUE	FALSE	NA	NA	NA	NA	NA	NA	NA	NA	NA	NA	TRUE	FALSE	NA	NA	NA	NA	NA	NA	NA	NA	NA	NA	NA	0	0	0	17.5596	0	8.77982	Inf	0	0	0	0.974587	0	0.487293	Inf
CG15269	TRUE	FALSE	NA	NA	NA	NA	NA	NA	NA	NA	NA	NA	TRUE	FALSE	NA	NA	NA	NA	NA	NA	NA	NA	NA	NA	NA	0	0	0	0.925301	0	0.46265	Inf	0	0	0	0.028562	0	0.014281	Inf
CG15306	TRUE	FALSE	NA	NA	NA	NA	NA	NA	NA	NA	NA	NA	TRUE	FALSE	NA	NA	NA	NA	NA	NA	NA	NA	NA	NA	NA	0	1.01614	0	0.926147	0	0.971145	Inf	0	0.0428747	0	0.0390309	0	0.0409528	Inf
CG15337	TRUE	FALSE	NA	NA	NA	NA	NA	NA	NA	NA	NA	NA	TRUE	FALSE	NA	NA	NA	NA	NA	NA	NA	NA	NA	NA	NA	0	0	0	0.925301	0	0.46265	Inf	0	0	0	0.044618	0	0.022309	Inf
CG15373	TRUE	FALSE	NA	NA	NA	NA	NA	NA	NA	NA	NA	NA	TRUE	FALSE	NA	NA	NA	NA	NA	NA	NA	NA	NA	NA	NA	0	1.02864	0	0	0	0.51432	Inf	0	0.0183551	0	0	0	0.00917755	Inf
CG15398	TRUE	FALSE	NA	NA	NA	NA	NA	NA	NA	NA	NA	NA	TRUE	FALSE	NA	NA	NA	NA	NA	NA	NA	NA	NA	NA	NA	0	1.0152	0	0.925301	0	0.970253	Inf	0	0.0758913	0	0.069088	0	0.0724896	Inf
CG15399	TRUE	FALSE	NA	NA	NA	NA	NA	NA	NA	NA	NA	NA	TRUE	FALSE	NA	NA	NA	NA	NA	NA	NA	NA	NA	NA	NA	0	0	0	0.925301	0	0.46265	Inf	0	0	0	0.0878801	0	0.04394	Inf
CG15414	TRUE	FALSE	NA	NA	NA	NA	NA	NA	NA	NA	NA	NA	TRUE	FALSE	NA	NA	NA	NA	NA	NA	NA	NA	NA	NA	NA	0	0	0	0.925301	0	0.46265	Inf	0	0	0	0.0456565	0	0.0228283	Inf
CG15423	TRUE	FALSE	NA	NA	NA	NA	NA	NA	NA	NA	NA	NA	TRUE	FALSE	NA	NA	NA	NA	NA	NA	NA	NA	NA	NA	NA	0	1.0152	0	12.0289	0	6.52206	Inf	0	0.164398	0	1.94559	0	1.05499	Inf
CG15434	TRUE	FALSE	NA	NA	NA	NA	NA	NA	NA	NA	NA	NA	TRUE	FALSE	NA	NA	NA	NA	NA	NA	NA	NA	NA	NA	NA	0	1.0152	0	0	0	0.507602	Inf	0	0.231167	0	0	0	0.115583	Inf
CG15446	TRUE	FALSE	NA	NA	NA	NA	NA	NA	NA	NA	NA	NA	TRUE	FALSE	NA	NA	NA	NA	NA	NA	NA	NA	NA	NA	NA	0	2.10554	0	0	0	1.05277	Inf	0	0.117495	0	0	0	0.0587473	Inf
CG15449	TRUE	FALSE	NA	NA	NA	NA	NA	NA	NA	NA	NA	NA	TRUE	FALSE	NA	NA	NA	NA	NA	NA	NA	NA	NA	NA	NA	0	3.04561	0	3.7012	0	3.37341	Inf	0	0.31979	0	0.388163	0	0.353977	Inf
CG15479	TRUE	FALSE	NA	NA	NA	NA	NA	NA	NA	NA	NA	NA	TRUE	FALSE	NA	NA	NA	NA	NA	NA	NA	NA	NA	NA	NA	0	3.04561	0	4.6265	0	3.83606	Inf	0	0.272592	0	0.413592	0	0.343092	Inf
CG15498	TRUE	FALSE	NA	NA	NA	NA	NA	NA	NA	NA	NA	NA	TRUE	FALSE	NA	NA	NA	NA	NA	NA	NA	NA	NA	NA	NA	0	0	0	0.925301	0	0.46265	Inf	0	0	0	0.0584307	0	0.0292154	Inf
CG15530	TRUE	FALSE	NA	NA	NA	NA	NA	NA	NA	NA	NA	NA	TRUE	FALSE	NA	NA	NA	NA	NA	NA	NA	NA	NA	NA	NA	0	1.0152	0	0	0	0.507602	Inf	0	0.0325422	0	0	0	0.0162711	Inf
CG15543	TRUE	FALSE	NA	NA	NA	NA	NA	NA	NA	NA	NA	NA	TRUE	FALSE	NA	NA	NA	NA	NA	NA	NA	NA	NA	NA	NA	0	1.35422	0	0	0	0.677108	Inf	0	0.0720831	0	0	0	0.0360415	Inf
CG15545	TRUE	FALSE	NA	NA	NA	NA	NA	NA	NA	NA	NA	NA	TRUE	FALSE	NA	NA	NA	NA	NA	NA	NA	NA	NA	NA	NA	0	1.0152	0	0	0	0.507602	Inf	0	0.056492	0	0	0	0.028246	Inf
CG15556	TRUE	FALSE	NA	NA	NA	NA	NA	NA	NA	NA	NA	NA	TRUE	FALSE	NA	NA	NA	NA	NA	NA	NA	NA	NA	NA	NA	0	4.13605	0	0.942444	0	2.53925	Inf	0	0.11178	0	0.0254399	0	0.0686099	Inf
CG15563	TRUE	FALSE	NA	NA	NA	NA	NA	NA	NA	NA	NA	NA	TRUE	FALSE	NA	NA	NA	NA	NA	NA	NA	NA	NA	NA	NA	0	1.0152	0	2.7759	0	1.89555	Inf	0	0.133187	0	0.363743	0	0.248465	Inf
CG15578	TRUE	FALSE	NA	NA	NA	NA	NA	NA	NA	NA	NA	NA	TRUE	FALSE	NA	NA	NA	NA	NA	NA	NA	NA	NA	NA	NA	0	0	0	0.925301	0	0.46265	Inf	0	0	0	0.254285	0	0.127143	Inf
CG15580	TRUE	FALSE	NA	NA	NA	NA	NA	NA	NA	NA	NA	NA	TRUE	FALSE	NA	NA	NA	NA	NA	NA	NA	NA	NA	NA	NA	0	1.0152	0	0	0	0.507602	Inf	0	0.0277522	0	0	0	0.0138761	Inf
CG15614	TRUE	FALSE	NA	NA	NA	NA	NA	NA	NA	NA	NA	NA	TRUE	FALSE	NA	NA	NA	NA	NA	NA	NA	NA	NA	NA	NA	0	1.0152	0	0.925301	0	0.970253	Inf	0	0.0455346	0	0.0414526	0	0.0434936	Inf
CG15617	TRUE	FALSE	NA	NA	NA	NA	NA	NA	NA	NA	NA	NA	TRUE	FALSE	NA	NA	NA	NA	NA	NA	NA	NA	NA	NA	NA	0	1.0152	0	0.925301	0	0.970253	Inf	0	0.0548985	0	0.0499771	0	0.0524378	Inf
CG15638	TRUE	FALSE	NA	NA	NA	NA	NA	NA	NA	NA	NA	NA	TRUE	FALSE	NA	NA	NA	NA	NA	NA	NA	NA	NA	NA	NA	0	1.0152	0	0	0	0.507602	Inf	0	0.20877	0	0	0	0.104385	Inf
CG15651	TRUE	FALSE	NA	NA	NA	NA	NA	NA	NA	NA	NA	NA	TRUE	FALSE	NA	NA	NA	NA	NA	NA	NA	NA	NA	NA	NA	0	1.0152	0	1.8506	0	1.4329	Inf	0	0.0256956	0	0.0467842	0	0.0362399	Inf
CG15696	TRUE	FALSE	NA	NA	NA	NA	NA	NA	NA	NA	NA	NA	TRUE	FALSE	NA	NA	NA	NA	NA	NA	NA	NA	NA	NA	NA	0	1.0152	0	0	0	0.507602	Inf	0	0.125174	0	0	0	0.062587	Inf
CG15708	TRUE	FALSE	NA	NA	NA	NA	NA	NA	NA	NA	NA	NA	TRUE	FALSE	NA	NA	NA	NA	NA	NA	NA	NA	NA	NA	NA	0	2.03041	0	0	0	1.0152	Inf	0	0.162187	0	0	0	0.0810935	Inf
CG15710	TRUE	FALSE	NA	NA	NA	NA	NA	NA	NA	NA	NA	NA	TRUE	FALSE	NA	NA	NA	NA	NA	NA	NA	NA	NA	NA	NA	0	0	0	0.925301	0	0.46265	Inf	0	0	0	0.0768182	0	0.0384091	Inf
CG15719	TRUE	FALSE	NA	NA	NA	NA	NA	NA	NA	NA	NA	NA	TRUE	FALSE	NA	NA	NA	NA	NA	NA	NA	NA	NA	NA	NA	0	1.0446	0	0	0	0.522302	Inf	0	0.116475	0	0	0	0.0582373	Inf
CG15725	TRUE	FALSE	NA	NA	NA	NA	NA	NA	NA	NA	NA	NA	TRUE	FALSE	NA	NA	NA	NA	NA	NA	NA	NA	NA	NA	NA	0	1.0152	0	0.925301	0	0.970253	Inf	0	0.0227329	0	0.020695	0	0.021714	Inf
CG15728	TRUE	FALSE	NA	NA	NA	NA	NA	NA	NA	NA	NA	NA	TRUE	FALSE	NA	NA	NA	NA	NA	NA	NA	NA	NA	NA	NA	0	1.07454	0	0	0	0.537271	Inf	0	0.0641163	0	0	0	0.0320582	Inf
CG15767	TRUE	FALSE	NA	NA	NA	NA	NA	NA	NA	NA	NA	NA	TRUE	FALSE	NA	NA	NA	NA	NA	NA	NA	NA	NA	NA	NA	0	0	0	0.925301	0	0.46265	Inf	0	0	0	0.0445095	0	0.0222548	Inf
CG15880	TRUE	FALSE	NA	NA	NA	NA	NA	NA	NA	NA	NA	NA	TRUE	FALSE	NA	NA	NA	NA	NA	NA	NA	NA	NA	NA	NA	0	1.0152	0	0	0	0.507602	Inf	0	0.0865619	0	0	0	0.0432809	Inf
CG15919	TRUE	FALSE	NA	NA	NA	NA	NA	NA	NA	NA	NA	NA	TRUE	FALSE	NA	NA	NA	NA	NA	NA	NA	NA	NA	NA	NA	0	0	0	0.925301	0	0.46265	Inf	0	0	0	0.221475	0	0.110738	Inf
CG15923	TRUE	FALSE	NA	NA	NA	NA	NA	NA	NA	NA	NA	NA	TRUE	FALSE	NA	NA	NA	NA	NA	NA	NA	NA	NA	NA	NA	0	2.03041	0	0	0	1.0152	Inf	0	0.0292879	0	0	0	0.014644	Inf
CG16732	TRUE	FALSE	NA	NA	NA	NA	NA	NA	NA	NA	NA	NA	TRUE	FALSE	NA	NA	NA	NA	NA	NA	NA	NA	NA	NA	NA	0	0	0	6.49588	0	3.24794	Inf	0	0	0	0.248046	0	0.124023	Inf
CG16739	TRUE	FALSE	NA	NA	NA	NA	NA	NA	NA	NA	NA	NA	TRUE	FALSE	NA	NA	NA	NA	NA	NA	NA	NA	NA	NA	NA	0	2.03041	0	0	0	1.0152	Inf	0	0.243282	0	0	0	0.121641	Inf
CG16762	TRUE	FALSE	NA	NA	NA	NA	NA	NA	NA	NA	NA	NA	TRUE	FALSE	NA	NA	NA	NA	NA	NA	NA	NA	NA	NA	NA	0	2.03041	0	0.925301	0	1.47786	Inf	0	0.1759	0	0.0800656	0	0.127983	Inf
CG16775	TRUE	FALSE	NA	NA	NA	NA	NA	NA	NA	NA	NA	NA	TRUE	FALSE	NA	NA	NA	NA	NA	NA	NA	NA	NA	NA	NA	0	0	0	0.925301	0	0.46265	Inf	0	0	0	0.110071	0	0.0550353	Inf
CG1678	TRUE	FALSE	NA	NA	NA	NA	NA	NA	NA	NA	NA	NA	TRUE	FALSE	NA	NA	NA	NA	NA	NA	NA	NA	NA	NA	NA	0	0	0	221.605	0	110.803	Inf	0	0	0	61.4681	0	30.734	Inf
CG16781	TRUE	FALSE	NA	NA	NA	NA	NA	NA	NA	NA	NA	NA	TRUE	FALSE	NA	NA	NA	NA	NA	NA	NA	NA	NA	NA	NA	0	1.01869	0	0	0	0.509345	Inf	0	0.0460559	0	0	0	0.023028	Inf
CG16799	TRUE	FALSE	NA	NA	NA	NA	NA	NA	NA	NA	NA	NA	TRUE	FALSE	NA	NA	NA	NA	NA	NA	NA	NA	NA	NA	NA	0	1.5009	0	8.57816	0	5.03953	Inf	0	0.110805	0	0.632535	0	0.37167	Inf
CG16815	TRUE	FALSE	NA	NA	NA	NA	NA	NA	NA	NA	NA	NA	TRUE	FALSE	NA	NA	NA	NA	NA	NA	NA	NA	NA	NA	NA	0	0	0	1.8506	0	0.925301	Inf	0	0	0	0.211658	0	0.105829	Inf
CG16826	TRUE	FALSE	NA	NA	NA	NA	NA	NA	NA	NA	NA	NA	TRUE	FALSE	NA	NA	NA	NA	NA	NA	NA	NA	NA	NA	NA	0	0	0	799.339	0	399.67	Inf	0	0	0	46.586	0	23.293	Inf
CG16854	TRUE	FALSE	NA	NA	NA	NA	NA	NA	NA	NA	NA	NA	TRUE	FALSE	NA	NA	NA	NA	NA	NA	NA	NA	NA	NA	NA	0	1.20635	0	0	0	0.603176	Inf	0	0.0280489	0	0	0	0.0140245	Inf
CG16885	TRUE	FALSE	NA	NA	NA	NA	NA	NA	NA	NA	NA	NA	TRUE	FALSE	NA	NA	NA	NA	NA	NA	NA	NA	NA	NA	NA	0	0	0	1.8506	0	0.925301	Inf	0	0	0	0.0968691	0	0.0484346	Inf
CG16886	TRUE	FALSE	NA	NA	NA	NA	NA	NA	NA	NA	NA	NA	TRUE	FALSE	NA	NA	NA	NA	NA	NA	NA	NA	NA	NA	NA	0	0	0	0.948575	0	0.474287	Inf	0	0	0	0.0258226	0	0.0129113	Inf
CG16984	TRUE	FALSE	NA	NA	NA	NA	NA	NA	NA	NA	NA	NA	TRUE	FALSE	NA	NA	NA	NA	NA	NA	NA	NA	NA	NA	NA	0	2.03041	0	0.925301	0	1.47786	Inf	0	0.125303	0	0.0570352	0	0.0911692	Inf
CG1701	TRUE	FALSE	NA	NA	NA	NA	NA	NA	NA	NA	NA	NA	TRUE	FALSE	NA	NA	NA	NA	NA	NA	NA	NA	NA	NA	NA	0	0	0	1.83423	0	0.917116	Inf	0	0	0	0.216244	0	0.108122	Inf
CG17010	TRUE	FALSE	NA	NA	NA	NA	NA	NA	NA	NA	NA	NA	TRUE	FALSE	NA	NA	NA	NA	NA	NA	NA	NA	NA	NA	NA	0	0	0	0.925301	0	0.46265	Inf	0	0	0	0.0452428	0	0.0226214	Inf
CG17028	TRUE	FALSE	NA	NA	NA	NA	NA	NA	NA	NA	NA	NA	TRUE	FALSE	NA	NA	NA	NA	NA	NA	NA	NA	NA	NA	NA	0	3.5876	0	1.08996	0	2.33878	Inf	0	0.260808	0	0.0791426	0	0.169975	Inf
CG17109	TRUE	FALSE	NA	NA	NA	NA	NA	NA	NA	NA	NA	NA	TRUE	FALSE	NA	NA	NA	NA	NA	NA	NA	NA	NA	NA	NA	0	2.08509	0	7.60175	0	4.84342	Inf	0	0.108319	0	0.394433	0	0.251376	Inf
CG17110	TRUE	FALSE	NA	NA	NA	NA	NA	NA	NA	NA	NA	NA	TRUE	FALSE	NA	NA	NA	NA	NA	NA	NA	NA	NA	NA	NA	0	4.06082	0	7.24691	0	5.65386	Inf	0	0.163284	0	0.291047	0	0.227165	Inf
CG17122	TRUE	FALSE	NA	NA	NA	NA	NA	NA	NA	NA	NA	NA	TRUE	FALSE	NA	NA	NA	NA	NA	NA	NA	NA	NA	NA	NA	0	1.0152	0	3.7012	0	2.3582	Inf	0	0.0345156	0	0.125686	0	0.0801007	Inf
CG17139	TRUE	FALSE	NA	NA	NA	NA	NA	NA	NA	NA	NA	NA	TRUE	FALSE	NA	NA	NA	NA	NA	NA	NA	NA	NA	NA	NA	0	0.983449	0	0.896357	0	0.939903	Inf	0	0.0265784	0	0.0241958	0	0.0253871	Inf
CG17140	TRUE	FALSE	NA	NA	NA	NA	NA	NA	NA	NA	NA	NA	TRUE	FALSE	NA	NA	NA	NA	NA	NA	NA	NA	NA	NA	NA	0	2.38372	0	0.753795	0	1.56876	Inf	0	0.0868303	0	0.0274253	0	0.0571278	Inf
CG17150	TRUE	FALSE	NA	NA	NA	NA	NA	NA	NA	NA	NA	NA	TRUE	FALSE	NA	NA	NA	NA	NA	NA	NA	NA	NA	NA	NA	0	0	0	0.512186	0	0.256093	Inf	0	0	0	0.00403619	0	0.0020181	Inf
CG17192	TRUE	FALSE	NA	NA	NA	NA	NA	NA	NA	NA	NA	NA	TRUE	FALSE	NA	NA	NA	NA	NA	NA	NA	NA	NA	NA	NA	0	0	0	36.0867	0	18.0434	Inf	0	0	0	2.51122	0	1.25561	Inf
CG17237	TRUE	FALSE	NA	NA	NA	NA	NA	NA	NA	NA	NA	NA	TRUE	FALSE	NA	NA	NA	NA	NA	NA	NA	NA	NA	NA	NA	0	1.0152	0	0	0	0.507602	Inf	0	0.0843827	0	0	0	0.0421913	Inf
CG17239	TRUE	FALSE	NA	NA	NA	NA	NA	NA	NA	NA	NA	NA	TRUE	FALSE	NA	NA	NA	NA	NA	NA	NA	NA	NA	NA	NA	0	1.07032	0	0	0	0.535161	Inf	0	0.105663	0	0	0	0.0528317	Inf
CG17290	TRUE	FALSE	NA	NA	NA	NA	NA	NA	NA	NA	NA	NA	TRUE	FALSE	NA	NA	NA	NA	NA	NA	NA	NA	NA	NA	NA	0	0	0	0.512337	0	0.256168	Inf	0	0	0	0.0244762	0	0.0122381	Inf
CG17350	TRUE	FALSE	NA	NA	NA	NA	NA	NA	NA	NA	NA	NA	TRUE	FALSE	NA	NA	NA	NA	NA	NA	NA	NA	NA	NA	NA	0	0	0	0.925301	0	0.46265	Inf	0	0	0	0.0599616	0	0.0299808	Inf
CG17378	TRUE	FALSE	NA	NA	NA	NA	NA	NA	NA	NA	NA	NA	TRUE	FALSE	NA	NA	NA	NA	NA	NA	NA	NA	NA	NA	NA	0	2.3848	0	0	0	1.1924	Inf	0	0.0695084	0	0	0	0.0347542	Inf
CG17572	TRUE	FALSE	NA	NA	NA	NA	NA	NA	NA	NA	NA	NA	TRUE	FALSE	NA	NA	NA	NA	NA	NA	NA	NA	NA	NA	NA	0	0	0	0.925301	0	0.46265	Inf	0	0	0	0.0479693	0	0.0239846	Inf
CG17625	TRUE	FALSE	NA	NA	NA	NA	NA	NA	NA	NA	NA	NA	TRUE	FALSE	NA	NA	NA	NA	NA	NA	NA	NA	NA	NA	NA	0	1.0152	0	2.7759	0	1.89555	Inf	0	0.167595	0	0.457712	0	0.312654	Inf
CG17633	TRUE	FALSE	NA	NA	NA	NA	NA	NA	NA	NA	NA	NA	TRUE	FALSE	NA	NA	NA	NA	NA	NA	NA	NA	NA	NA	NA	0	0	0	10.1783	0	5.08915	Inf	0	0	0	0.524911	0	0.262456	Inf
CG17856	TRUE	FALSE	NA	NA	NA	NA	NA	NA	NA	NA	NA	NA	TRUE	FALSE	NA	NA	NA	NA	NA	NA	NA	NA	NA	NA	NA	0	1.0152	0	0	0	0.507602	Inf	0	0.198468	0	0	0	0.0992341	Inf
CG17929	TRUE	FALSE	NA	NA	NA	NA	NA	NA	NA	NA	NA	NA	TRUE	FALSE	NA	NA	NA	NA	NA	NA	NA	NA	NA	NA	NA	0	0	0	0.925301	0	0.46265	Inf	0	0	0	0.0373384	0	0.0186692	Inf
CG17999	TRUE	FALSE	NA	NA	NA	NA	NA	NA	NA	NA	NA	NA	TRUE	FALSE	NA	NA	NA	NA	NA	NA	NA	NA	NA	NA	NA	0	0	0	0.925301	0	0.46265	Inf	0	0	0	0.0368128	0	0.0184064	Inf
CG18063	TRUE	FALSE	NA	NA	NA	NA	NA	NA	NA	NA	NA	NA	TRUE	FALSE	NA	NA	NA	NA	NA	NA	NA	NA	NA	NA	NA	0	1.01894	0	0	0	0.509468	Inf	0	0.0560177	0	0	0	0.0280088	Inf
CG18095	TRUE	FALSE	NA	NA	NA	NA	NA	NA	NA	NA	NA	NA	TRUE	FALSE	NA	NA	NA	NA	NA	NA	NA	NA	NA	NA	NA	0	6.75476	0	1.8506	0	4.30268	Inf	0	0.244926	0	0.0670222	0	0.155974	Inf
CG18132	TRUE	FALSE	NA	NA	NA	NA	NA	NA	NA	NA	NA	NA	TRUE	FALSE	NA	NA	NA	NA	NA	NA	NA	NA	NA	NA	NA	0	0	0	1.8506	0	0.925301	Inf	0	0	0	0.226496	0	0.113248	Inf
CG18136	TRUE	FALSE	NA	NA	NA	NA	NA	NA	NA	NA	NA	NA	TRUE	FALSE	NA	NA	NA	NA	NA	NA	NA	NA	NA	NA	NA	0	1.0152	0	0	0	0.507602	Inf	0	0.0364112	0	0	0	0.0182056	Inf
CG18173	TRUE	FALSE	NA	NA	NA	NA	NA	NA	NA	NA	NA	NA	TRUE	FALSE	NA	NA	NA	NA	NA	NA	NA	NA	NA	NA	NA	0	0	0	1.71927	0	0.859637	Inf	0	0	0	0.0548972	0	0.0274486	Inf
CG18179	TRUE	FALSE	NA	NA	NA	NA	NA	NA	NA	NA	NA	NA	TRUE	FALSE	NA	NA	NA	NA	NA	NA	NA	NA	NA	NA	NA	0	0	0	6.47711	0	3.23855	Inf	0	0	0	0.572988	0	0.286494	Inf
CG18368	TRUE	FALSE	NA	NA	NA	NA	NA	NA	NA	NA	NA	NA	TRUE	FALSE	NA	NA	NA	NA	NA	NA	NA	NA	NA	NA	NA	0	2.03041	0	0	0	1.0152	Inf	0	0.0329689	0	0	0	0.0164845	Inf
CG18404	TRUE	FALSE	NA	NA	NA	NA	NA	NA	NA	NA	NA	NA	TRUE	FALSE	NA	NA	NA	NA	NA	NA	NA	NA	NA	NA	NA	0	0	0	15.7301	0	7.86506	Inf	0	0	0	2.28856	0	1.14428	Inf
CG18420	TRUE	FALSE	NA	NA	NA	NA	NA	NA	NA	NA	NA	NA	TRUE	FALSE	NA	NA	NA	NA	NA	NA	NA	NA	NA	NA	NA	0	0	0	0.925301	0	0.46265	Inf	0	0	0	0.0331271	0	0.0165635	Inf
CG18467	TRUE	FALSE	NA	NA	NA	NA	NA	NA	NA	NA	NA	NA	TRUE	FALSE	NA	NA	NA	NA	NA	NA	NA	NA	NA	NA	NA	0	2.03041	0	0	0	1.0152	Inf	0	0.0955398	0	0	0	0.0477699	Inf
CG18478	TRUE	FALSE	NA	NA	NA	NA	NA	NA	NA	NA	NA	NA	TRUE	FALSE	NA	NA	NA	NA	NA	NA	NA	NA	NA	NA	NA	0	0	0	0.925301	0	0.46265	Inf	0	0	0	0.0731358	0	0.0365679	Inf
CG18493	TRUE	FALSE	NA	NA	NA	NA	NA	NA	NA	NA	NA	NA	TRUE	FALSE	NA	NA	NA	NA	NA	NA	NA	NA	NA	NA	NA	0	0	0	3.7012	0	1.8506	Inf	0	0	0	0.160716	0	0.0803581	Inf
CG1850	TRUE	FALSE	NA	NA	NA	NA	NA	NA	NA	NA	NA	NA	TRUE	FALSE	NA	NA	NA	NA	NA	NA	NA	NA	NA	NA	NA	0	2.03041	0	1.8506	0	1.94051	Inf	0	0.0547489	0	0.0498409	0	0.0522949	Inf
CG18538	TRUE	FALSE	NA	NA	NA	NA	NA	NA	NA	NA	NA	NA	TRUE	FALSE	NA	NA	NA	NA	NA	NA	NA	NA	NA	NA	NA	0	1.0152	0	0.925301	0	0.970253	Inf	0	0.172383	0	0.15693	0	0.164657	Inf
CG18563	TRUE	FALSE	NA	NA	NA	NA	NA	NA	NA	NA	NA	NA	TRUE	FALSE	NA	NA	NA	NA	NA	NA	NA	NA	NA	NA	NA	0	2.03041	0	4.6265	0	3.32846	Inf	0	0.114702	0	0.26105	0	0.187876	Inf
CG18577	TRUE	FALSE	NA	NA	NA	NA	NA	NA	NA	NA	NA	NA	TRUE	FALSE	NA	NA	NA	NA	NA	NA	NA	NA	NA	NA	NA	0	0	0	2.7759	0	1.38795	Inf	0	0	0	0.270123	0	0.135062	Inf
CG18599	TRUE	FALSE	NA	NA	NA	NA	NA	NA	NA	NA	NA	NA	TRUE	FALSE	NA	NA	NA	NA	NA	NA	NA	NA	NA	NA	NA	0	0	0	1.8506	0	0.925301	Inf	0	0	0	0.0666562	0	0.0333281	Inf
CG18606	TRUE	FALSE	NA	NA	NA	NA	NA	NA	NA	NA	NA	NA	TRUE	FALSE	NA	NA	NA	NA	NA	NA	NA	NA	NA	NA	NA	0	1.0152	0	0	0	0.507602	Inf	0	0.0741198	0	0	0	0.0370599	Inf
CG18641	TRUE	FALSE	NA	NA	NA	NA	NA	NA	NA	NA	NA	NA	TRUE	FALSE	NA	NA	NA	NA	NA	NA	NA	NA	NA	NA	NA	0	1.0152	0	0	0	0.507602	Inf	0	0.0379216	0	0	0	0.0189608	Inf
CG18675	TRUE	FALSE	NA	NA	NA	NA	NA	NA	NA	NA	NA	NA	TRUE	FALSE	NA	NA	NA	NA	NA	NA	NA	NA	NA	NA	NA	0	3.63343	0	2.84963	0	3.24153	Inf	0	0.153253	0	0.12005	0	0.136652	Inf
CG18746	TRUE	FALSE	NA	NA	NA	NA	NA	NA	NA	NA	NA	NA	TRUE	FALSE	NA	NA	NA	NA	NA	NA	NA	NA	NA	NA	NA	0	0	0	0.925301	0	0.46265	Inf	0	0	0	0.0426434	0	0.0213217	Inf
CG18747	TRUE	FALSE	NA	NA	NA	NA	NA	NA	NA	NA	NA	NA	TRUE	FALSE	NA	NA	NA	NA	NA	NA	NA	NA	NA	NA	NA	0	0	0	2.7759	0	1.38795	Inf	0	0	0	0.13629	0	0.0681449	Inf
CG18748	TRUE	FALSE	NA	NA	NA	NA	NA	NA	NA	NA	NA	NA	TRUE	FALSE	NA	NA	NA	NA	NA	NA	NA	NA	NA	NA	NA	0	0	0	0.985127	0	0.492563	Inf	0	0	0	0.047349	0	0.0236745	Inf
CG18765	TRUE	FALSE	NA	NA	NA	NA	NA	NA	NA	NA	NA	NA	TRUE	FALSE	NA	NA	NA	NA	NA	NA	NA	NA	NA	NA	NA	0	1.0152	0	0	0	0.507602	Inf	0	0.0579016	0	0	0	0.0289508	Inf
CG1946	TRUE	FALSE	NA	NA	NA	NA	NA	NA	NA	NA	NA	NA	TRUE	FALSE	NA	NA	NA	NA	NA	NA	NA	NA	NA	NA	NA	0	2.03041	0	4.6265	0	3.32846	Inf	0	0.121886	0	0.277398	0	0.199642	Inf
CG1979	TRUE	FALSE	NA	NA	NA	NA	NA	NA	NA	NA	NA	NA	TRUE	FALSE	NA	NA	NA	NA	NA	NA	NA	NA	NA	NA	NA	0	1.0152	0	1.8506	0	1.4329	Inf	0	0.0187022	0	0.0340512	0	0.0263767	Inf
CG2014	TRUE	FALSE	NA	NA	NA	NA	NA	NA	NA	NA	NA	NA	TRUE	FALSE	NA	NA	NA	NA	NA	NA	NA	NA	NA	NA	NA	0	1.05259	0	0	0	0.526293	Inf	0	0.116926	0	0	0	0.058463	Inf
CG2127	TRUE	FALSE	NA	NA	NA	NA	NA	NA	NA	NA	NA	NA	TRUE	FALSE	NA	NA	NA	NA	NA	NA	NA	NA	NA	NA	NA	0	0	0	0.942959	0	0.47148	Inf	0	0	0	0.0381157	0	0.0190579	Inf
CG2256	TRUE	FALSE	NA	NA	NA	NA	NA	NA	NA	NA	NA	NA	TRUE	FALSE	NA	NA	NA	NA	NA	NA	NA	NA	NA	NA	NA	0	4.06082	0	3.7012	0	3.88101	Inf	0	0.25484	0	0.231995	0	0.243418	Inf
CG2444	TRUE	FALSE	NA	NA	NA	NA	NA	NA	NA	NA	NA	NA	TRUE	FALSE	NA	NA	NA	NA	NA	NA	NA	NA	NA	NA	NA	0	0	0	6.0756	0	3.0378	Inf	0	0	0	0.625573	0	0.312786	Inf
CG2528	TRUE	FALSE	NA	NA	NA	NA	NA	NA	NA	NA	NA	NA	TRUE	FALSE	NA	NA	NA	NA	NA	NA	NA	NA	NA	NA	NA	0	1.0152	0	7.40241	0	4.20881	Inf	0	0.0281536	0	0.205038	0	0.116596	Inf
CG2577	TRUE	FALSE	NA	NA	NA	NA	NA	NA	NA	NA	NA	NA	TRUE	FALSE	NA	NA	NA	NA	NA	NA	NA	NA	NA	NA	NA	0	1.0152	0	0	0	0.507602	Inf	0	0.0532981	0	0	0	0.026649	Inf
CG2839	TRUE	FALSE	NA	NA	NA	NA	NA	NA	NA	NA	NA	NA	TRUE	FALSE	NA	NA	NA	NA	NA	NA	NA	NA	NA	NA	NA	0	1.0152	0	0.925301	0	0.970253	Inf	0	0.0256737	0	0.0233722	0	0.024523	Inf
CG2983	TRUE	FALSE	NA	NA	NA	NA	NA	NA	NA	NA	NA	NA	TRUE	FALSE	NA	NA	NA	NA	NA	NA	NA	NA	NA	NA	NA	0	0	0	0.925301	0	0.46265	Inf	0	0	0	0.0495711	0	0.0247856	Inf
CG30025	TRUE	FALSE	NA	NA	NA	NA	NA	NA	NA	NA	NA	NA	TRUE	FALSE	NA	NA	NA	NA	NA	NA	NA	NA	NA	NA	NA	0	0	0	200.4	0	100.2	Inf	0	0	0	19.469	0	9.73451	Inf
CG30031	TRUE	FALSE	NA	NA	NA	NA	NA	NA	NA	NA	NA	NA	TRUE	FALSE	NA	NA	NA	NA	NA	NA	NA	NA	NA	NA	NA	0	0	0	13.9185	0	6.95926	Inf	0	0	0	1.34999	0	0.674993	Inf
CG30037	TRUE	FALSE	NA	NA	NA	NA	NA	NA	NA	NA	NA	NA	TRUE	FALSE	NA	NA	NA	NA	NA	NA	NA	NA	NA	NA	NA	0	1.0152	0	0	0	0.507602	Inf	0	0.0507857	0	0	0	0.0253928	Inf
CG30053	TRUE	FALSE	NA	NA	NA	NA	NA	NA	NA	NA	NA	NA	TRUE	FALSE	NA	NA	NA	NA	NA	NA	NA	NA	NA	NA	NA	0	1.0152	0	0	0	0.507602	Inf	0	0.0678667	0	0	0	0.0339334	Inf
CG30080	TRUE	FALSE	NA	NA	NA	NA	NA	NA	NA	NA	NA	NA	TRUE	FALSE	NA	NA	NA	NA	NA	NA	NA	NA	NA	NA	NA	0	0.400285	0	0	0	0.200142	Inf	0	0.0116384	0	0	0	0.00581918	Inf
CG30087	TRUE	FALSE	NA	NA	NA	NA	NA	NA	NA	NA	NA	NA	TRUE	FALSE	NA	NA	NA	NA	NA	NA	NA	NA	NA	NA	NA	0	1.0152	0	0	0	0.507602	Inf	0	0.0950137	0	0	0	0.0475068	Inf
CG30095	TRUE	FALSE	NA	NA	NA	NA	NA	NA	NA	NA	NA	NA	TRUE	FALSE	NA	NA	NA	NA	NA	NA	NA	NA	NA	NA	NA	0	0	0	0.925301	0	0.46265	Inf	0	0	0	0.123151	0	0.0615754	Inf
CG30098	TRUE	FALSE	NA	NA	NA	NA	NA	NA	NA	NA	NA	NA	TRUE	FALSE	NA	NA	NA	NA	NA	NA	NA	NA	NA	NA	NA	0	0	0	0.925301	0	0.46265	Inf	0	0	0	0.0900411	0	0.0450205	Inf
CG30161	TRUE	FALSE	NA	NA	NA	NA	NA	NA	NA	NA	NA	NA	TRUE	FALSE	NA	NA	NA	NA	NA	NA	NA	NA	NA	NA	NA	0	1.0152	0	1.8506	0	1.4329	Inf	0	0.0932514	0	0.169784	0	0.131518	Inf
CG30172	TRUE	FALSE	NA	NA	NA	NA	NA	NA	NA	NA	NA	NA	TRUE	FALSE	NA	NA	NA	NA	NA	NA	NA	NA	NA	NA	NA	0	1.7263	0	0.655349	0	1.19083	Inf	0	0.260063	0	0.0986088	0	0.179336	Inf
CG30272	TRUE	FALSE	NA	NA	NA	NA	NA	NA	NA	NA	NA	NA	TRUE	FALSE	NA	NA	NA	NA	NA	NA	NA	NA	NA	NA	NA	0	0	0	4.6265	0	2.31325	Inf	0	0	0	0.183082	0	0.0915412	Inf
CG30284	TRUE	FALSE	NA	NA	NA	NA	NA	NA	NA	NA	NA	NA	TRUE	FALSE	NA	NA	NA	NA	NA	NA	NA	NA	NA	NA	NA	0	1.0709	0	0	0	0.535452	Inf	0	0.0682506	0	0	0	0.0341253	Inf
CG30355	TRUE	FALSE	NA	NA	NA	NA	NA	NA	NA	NA	NA	NA	TRUE	FALSE	NA	NA	NA	NA	NA	NA	NA	NA	NA	NA	NA	0	0	0	0.925301	0	0.46265	Inf	0	0	0	0.099502	0	0.049751	Inf
CG30411	TRUE	FALSE	NA	NA	NA	NA	NA	NA	NA	NA	NA	NA	TRUE	FALSE	NA	NA	NA	NA	NA	NA	NA	NA	NA	NA	NA	0	2.03041	0	1.8506	0	1.94051	Inf	0	0.116249	0	0.105828	0	0.111039	Inf
CG30431	TRUE	FALSE	NA	NA	NA	NA	NA	NA	NA	NA	NA	NA	TRUE	FALSE	NA	NA	NA	NA	NA	NA	NA	NA	NA	NA	NA	0	0	0	1.8506	0	0.925301	Inf	0	0	0	0.0665754	0	0.0332877	Inf
CG30432	TRUE	FALSE	NA	NA	NA	NA	NA	NA	NA	NA	NA	NA	TRUE	FALSE	NA	NA	NA	NA	NA	NA	NA	NA	NA	NA	NA	0	1.0152	0	0	0	0.507602	Inf	0	0.0885956	0	0	0	0.0442978	Inf
CG30471	TRUE	FALSE	NA	NA	NA	NA	NA	NA	NA	NA	NA	NA	TRUE	FALSE	NA	NA	NA	NA	NA	NA	NA	NA	NA	NA	NA	0	3.04561	0	2.7759	0	2.91076	Inf	0	0.080948	0	0.0736914	0	0.0773197	Inf
CG30479	TRUE	FALSE	NA	NA	NA	NA	NA	NA	NA	NA	NA	NA	TRUE	FALSE	NA	NA	NA	NA	NA	NA	NA	NA	NA	NA	NA	0	0	0	5.54206	0	2.77103	Inf	0	0	0	0.179765	0	0.0898824	Inf
CG30485	TRUE	FALSE	NA	NA	NA	NA	NA	NA	NA	NA	NA	NA	TRUE	FALSE	NA	NA	NA	NA	NA	NA	NA	NA	NA	NA	NA	0	0	0	1.8506	0	0.925301	Inf	0	0	0	0.0378399	0	0.0189199	Inf
CG3062	TRUE	FALSE	NA	NA	NA	NA	NA	NA	NA	NA	NA	NA	TRUE	FALSE	NA	NA	NA	NA	NA	NA	NA	NA	NA	NA	NA	0	0	0	0.925301	0	0.46265	Inf	0	0	0	0.0739232	0	0.0369616	Inf
CG31016	TRUE	FALSE	NA	NA	NA	NA	NA	NA	NA	NA	NA	NA	TRUE	FALSE	NA	NA	NA	NA	NA	NA	NA	NA	NA	NA	NA	0	1.82581	0	1.66413	0	1.74497	Inf	0	0.0420735	0	0.0383018	0	0.0401876	Inf
CG31030	TRUE	FALSE	NA	NA	NA	NA	NA	NA	NA	NA	NA	NA	TRUE	FALSE	NA	NA	NA	NA	NA	NA	NA	NA	NA	NA	NA	0	2.06981	0	0	0	1.03491	Inf	0	0.0851564	0	0	0	0.0425782	Inf
CG31055	TRUE	FALSE	NA	NA	NA	NA	NA	NA	NA	NA	NA	NA	TRUE	FALSE	NA	NA	NA	NA	NA	NA	NA	NA	NA	NA	NA	0	0	0	0.929368	0	0.464684	Inf	0	0	0	0.0303277	0	0.0151639	Inf
CG31089	TRUE	FALSE	NA	NA	NA	NA	NA	NA	NA	NA	NA	NA	TRUE	FALSE	NA	NA	NA	NA	NA	NA	NA	NA	NA	NA	NA	0	0	0	0.925301	0	0.46265	Inf	0	0	0	0.0454299	0	0.022715	Inf
CG31097	TRUE	FALSE	NA	NA	NA	NA	NA	NA	NA	NA	NA	NA	TRUE	FALSE	NA	NA	NA	NA	NA	NA	NA	NA	NA	NA	NA	0	1.0152	0	0.925301	0	0.970253	Inf	0	0.0472092	0	0.0429771	0	0.0450932	Inf
CG31104	TRUE	FALSE	NA	NA	NA	NA	NA	NA	NA	NA	NA	NA	TRUE	FALSE	NA	NA	NA	NA	NA	NA	NA	NA	NA	NA	NA	0	0	0	19.4313	0	9.71566	Inf	0	0	0	0.974996	0	0.487498	Inf
CG31115	TRUE	FALSE	NA	NA	NA	NA	NA	NA	NA	NA	NA	NA	TRUE	FALSE	NA	NA	NA	NA	NA	NA	NA	NA	NA	NA	NA	0	0	0	0.925301	0	0.46265	Inf	0	0	0	0.0702365	0	0.0351182	Inf
CG31131	TRUE	FALSE	NA	NA	NA	NA	NA	NA	NA	NA	NA	NA	TRUE	FALSE	NA	NA	NA	NA	NA	NA	NA	NA	NA	NA	NA	0	0	0	1.38795	0	0.693976	Inf	0	0	0	0.0800653	0	0.0400327	Inf
CG31139	TRUE	FALSE	NA	NA	NA	NA	NA	NA	NA	NA	NA	NA	TRUE	FALSE	NA	NA	NA	NA	NA	NA	NA	NA	NA	NA	NA	0	0	0	0.926927	0	0.463463	Inf	0	0	0	0.0495241	0	0.0247621	Inf
CG31141	TRUE	FALSE	NA	NA	NA	NA	NA	NA	NA	NA	NA	NA	TRUE	FALSE	NA	NA	NA	NA	NA	NA	NA	NA	NA	NA	NA	0	1.0152	0	0	0	0.507602	Inf	0	0.0791779	0	0	0	0.039589	Inf
CG3117	TRUE	FALSE	NA	NA	NA	NA	NA	NA	NA	NA	NA	NA	TRUE	FALSE	NA	NA	NA	NA	NA	NA	NA	NA	NA	NA	NA	0	0	0	0.925301	0	0.46265	Inf	0	0	0	0.0539537	0	0.0269768	Inf
CG31220	TRUE	FALSE	NA	NA	NA	NA	NA	NA	NA	NA	NA	NA	TRUE	FALSE	NA	NA	NA	NA	NA	NA	NA	NA	NA	NA	NA	0	1.0152	0	0.925301	0	0.970253	Inf	0	0.0493727	0	0.0449466	0	0.0471596	Inf
CG31233	TRUE	FALSE	NA	NA	NA	NA	NA	NA	NA	NA	NA	NA	TRUE	FALSE	NA	NA	NA	NA	NA	NA	NA	NA	NA	NA	NA	0	0	0	24.0578	0	12.0289	Inf	0	0	0	0.520044	0	0.260022	Inf
CG31253	TRUE	FALSE	NA	NA	NA	NA	NA	NA	NA	NA	NA	NA	TRUE	FALSE	NA	NA	NA	NA	NA	NA	NA	NA	NA	NA	NA	0	0	0	1.38795	0	0.693976	Inf	0	0	0	0.0800653	0	0.0400327	Inf
CG31267	TRUE	FALSE	NA	NA	NA	NA	NA	NA	NA	NA	NA	NA	TRUE	FALSE	NA	NA	NA	NA	NA	NA	NA	NA	NA	NA	NA	0	1.0152	0	0	0	0.507602	Inf	0	0.0835645	0	0	0	0.0417823	Inf
CG31286	TRUE	FALSE	NA	NA	NA	NA	NA	NA	NA	NA	NA	NA	TRUE	FALSE	NA	NA	NA	NA	NA	NA	NA	NA	NA	NA	NA	0	1.0152	0	0	0	0.507602	Inf	0	0.0369011	0	0	0	0.0184506	Inf
CG31321	TRUE	FALSE	NA	NA	NA	NA	NA	NA	NA	NA	NA	NA	TRUE	FALSE	NA	NA	NA	NA	NA	NA	NA	NA	NA	NA	NA	0	2.03041	0	4.6265	0	3.32846	Inf	0	0.0603634	0	0.13738	0	0.0988719	Inf
CG31337	TRUE	FALSE	NA	NA	NA	NA	NA	NA	NA	NA	NA	NA	TRUE	FALSE	NA	NA	NA	NA	NA	NA	NA	NA	NA	NA	NA	0	1.0152	0	0	0	0.507602	Inf	0	0.092821	0	0	0	0.0464105	Inf
CG31343	TRUE	FALSE	NA	NA	NA	NA	NA	NA	NA	NA	NA	NA	TRUE	FALSE	NA	NA	NA	NA	NA	NA	NA	NA	NA	NA	NA	0	0	0	0.925301	0	0.46265	Inf	0	0	0	0.019581	0	0.00979048	Inf
CG31371	TRUE	FALSE	NA	NA	NA	NA	NA	NA	NA	NA	NA	NA	TRUE	FALSE	NA	NA	NA	NA	NA	NA	NA	NA	NA	NA	NA	0	2.06218	0	0	0	1.03109	Inf	0	0.0803373	0	0	0	0.0401687	Inf
CG31406	TRUE	FALSE	NA	NA	NA	NA	NA	NA	NA	NA	NA	NA	TRUE	FALSE	NA	NA	NA	NA	NA	NA	NA	NA	NA	NA	NA	0	1.56224	0	2.64252	0	2.10238	Inf	0	0.148788	0	0.251374	0	0.200081	Inf
CG31415	TRUE	FALSE	NA	NA	NA	NA	NA	NA	NA	NA	NA	NA	TRUE	FALSE	NA	NA	NA	NA	NA	NA	NA	NA	NA	NA	NA	0	1.0152	0	0.925301	0	0.970253	Inf	0	0.115804	0	0.105423	0	0.110613	Inf
CG31446	TRUE	FALSE	NA	NA	NA	NA	NA	NA	NA	NA	NA	NA	TRUE	FALSE	NA	NA	NA	NA	NA	NA	NA	NA	NA	NA	NA	0	0	0	4.67829	0	2.33915	Inf	0	0	0	0.409888	0	0.204944	Inf
CG31463	TRUE	FALSE	NA	NA	NA	NA	NA	NA	NA	NA	NA	NA	TRUE	FALSE	NA	NA	NA	NA	NA	NA	NA	NA	NA	NA	NA	0	1.0152	0	0	0	0.507602	Inf	0	0.056072	0	0	0	0.028036	Inf
CG31477	TRUE	FALSE	NA	NA	NA	NA	NA	NA	NA	NA	NA	NA	TRUE	FALSE	NA	NA	NA	NA	NA	NA	NA	NA	NA	NA	NA	0	20.4305	0	13.966	0	17.1982	Inf	0	4.29046	0	2.92939	0	3.60992	Inf
CG31516	TRUE	FALSE	NA	NA	NA	NA	NA	NA	NA	NA	NA	NA	TRUE	FALSE	NA	NA	NA	NA	NA	NA	NA	NA	NA	NA	NA	0	2.03041	0	0	0	1.0152	Inf	0	0.082142	0	0	0	0.041071	Inf
CG31526	TRUE	FALSE	NA	NA	NA	NA	NA	NA	NA	NA	NA	NA	TRUE	FALSE	NA	NA	NA	NA	NA	NA	NA	NA	NA	NA	NA	0	0	0	0.938488	0	0.469244	Inf	0	0	0	0.130464	0	0.065232	Inf
CG31636	TRUE	FALSE	NA	NA	NA	NA	NA	NA	NA	NA	NA	NA	TRUE	FALSE	NA	NA	NA	NA	NA	NA	NA	NA	NA	NA	NA	0	0	0	1.04065	0	0.520324	Inf	0	0	0	0.0501596	0	0.0250798	Inf
CG31646	TRUE	FALSE	NA	NA	NA	NA	NA	NA	NA	NA	NA	NA	TRUE	FALSE	NA	NA	NA	NA	NA	NA	NA	NA	NA	NA	NA	0	1.0152	0	0	0	0.507602	Inf	0	0.0224956	0	0	0	0.0112478	Inf
CG31664	TRUE	FALSE	NA	NA	NA	NA	NA	NA	NA	NA	NA	NA	TRUE	FALSE	NA	NA	NA	NA	NA	NA	NA	NA	NA	NA	NA	0	1.045	0	0.952454	0	0.998725	Inf	0	0.0340481	0	0.0309959	0	0.032522	Inf
CG31728	TRUE	FALSE	NA	NA	NA	NA	NA	NA	NA	NA	NA	NA	TRUE	FALSE	NA	NA	NA	NA	NA	NA	NA	NA	NA	NA	NA	0	3.04561	0	0	0	1.52281	Inf	0	0.0731903	0	0	0	0.0365952	Inf
CG31750	TRUE	FALSE	NA	NA	NA	NA	NA	NA	NA	NA	NA	NA	TRUE	FALSE	NA	NA	NA	NA	NA	NA	NA	NA	NA	NA	NA	0	2.03041	0	0.925301	0	1.47786	Inf	0	0.116699	0	0.0531188	0	0.084909	Inf
CG31760	TRUE	FALSE	NA	NA	NA	NA	NA	NA	NA	NA	NA	NA	TRUE	FALSE	NA	NA	NA	NA	NA	NA	NA	NA	NA	NA	NA	0	1.02053	0	1.8603	0	1.44041	Inf	0	0.0143992	0	0.0262167	0	0.020308	Inf
CG31773	TRUE	FALSE	NA	NA	NA	NA	NA	NA	NA	NA	NA	NA	TRUE	FALSE	NA	NA	NA	NA	NA	NA	NA	NA	NA	NA	NA	0	0	0	0.925301	0	0.46265	Inf	0	0	0	0.0239427	0	0.0119714	Inf
CG31784	TRUE	FALSE	NA	NA	NA	NA	NA	NA	NA	NA	NA	NA	TRUE	FALSE	NA	NA	NA	NA	NA	NA	NA	NA	NA	NA	NA	0	0	0	2.7759	0	1.38795	Inf	0	0	0	0.0728122	0	0.0364061	Inf
CG31785	TRUE	FALSE	NA	NA	NA	NA	NA	NA	NA	NA	NA	NA	TRUE	FALSE	NA	NA	NA	NA	NA	NA	NA	NA	NA	NA	NA	0	3.04561	0	5.55181	0	4.29871	Inf	0	0.140528	0	0.255861	0	0.198194	Inf
CG31805	TRUE	FALSE	NA	NA	NA	NA	NA	NA	NA	NA	NA	NA	TRUE	FALSE	NA	NA	NA	NA	NA	NA	NA	NA	NA	NA	NA	0	3.05172	0	0.927147	0	1.98944	Inf	0	0.0974022	0	0.0295565	0	0.0634794	Inf
CG31819	TRUE	FALSE	NA	NA	NA	NA	NA	NA	NA	NA	NA	NA	TRUE	FALSE	NA	NA	NA	NA	NA	NA	NA	NA	NA	NA	NA	0	0	0	0.925301	0	0.46265	Inf	0	0	0	0.0368375	0	0.0184188	Inf
CG31827	TRUE	FALSE	NA	NA	NA	NA	NA	NA	NA	NA	NA	NA	TRUE	FALSE	NA	NA	NA	NA	NA	NA	NA	NA	NA	NA	NA	0	0	0	0.925301	0	0.46265	Inf	0	0	0	0.0731358	0	0.0365679	Inf
CG31848	TRUE	FALSE	NA	NA	NA	NA	NA	NA	NA	NA	NA	NA	TRUE	FALSE	NA	NA	NA	NA	NA	NA	NA	NA	NA	NA	NA	0	1.0152	0	0	0	0.507602	Inf	0	0.0977856	0	0	0	0.0488928	Inf
CG31924	TRUE	FALSE	NA	NA	NA	NA	NA	NA	NA	NA	NA	NA	TRUE	FALSE	NA	NA	NA	NA	NA	NA	NA	NA	NA	NA	NA	0	1.0152	0	0	0	0.507602	Inf	0	0.0973124	0	0	0	0.0486562	Inf
CG31988	TRUE	FALSE	NA	NA	NA	NA	NA	NA	NA	NA	NA	NA	TRUE	FALSE	NA	NA	NA	NA	NA	NA	NA	NA	NA	NA	NA	0	0	0	2.00387	0	1.00194	Inf	0	0	0	0.134785	0	0.0673925	Inf
CG3199	TRUE	FALSE	NA	NA	NA	NA	NA	NA	NA	NA	NA	NA	TRUE	FALSE	NA	NA	NA	NA	NA	NA	NA	NA	NA	NA	NA	0	0	0	0.925301	0	0.46265	Inf	0	0	0	0.0830938	0	0.0415469	Inf
CG32024	TRUE	FALSE	NA	NA	NA	NA	NA	NA	NA	NA	NA	NA	TRUE	FALSE	NA	NA	NA	NA	NA	NA	NA	NA	NA	NA	NA	0	1.0152	0	1.8506	0	1.4329	Inf	0	0.110908	0	0.201931	0	0.156419	Inf
CG32052	TRUE	FALSE	NA	NA	NA	NA	NA	NA	NA	NA	NA	NA	TRUE	FALSE	NA	NA	NA	NA	NA	NA	NA	NA	NA	NA	NA	0	0	0	0.925301	0	0.46265	Inf	0	0	0	0.0253928	0	0.0126964	Inf
CG32053	TRUE	FALSE	NA	NA	NA	NA	NA	NA	NA	NA	NA	NA	TRUE	FALSE	NA	NA	NA	NA	NA	NA	NA	NA	NA	NA	NA	0	0	0	0.925301	0	0.46265	Inf	0	0	0	0.0387066	0	0.0193533	Inf
CG32054	TRUE	FALSE	NA	NA	NA	NA	NA	NA	NA	NA	NA	NA	TRUE	FALSE	NA	NA	NA	NA	NA	NA	NA	NA	NA	NA	NA	0	0	0	6.47711	0	3.23855	Inf	0	0	0	0.243955	0	0.121977	Inf
CG32119	TRUE	FALSE	NA	NA	NA	NA	NA	NA	NA	NA	NA	NA	TRUE	FALSE	NA	NA	NA	NA	NA	NA	NA	NA	NA	NA	NA	0	0	0	0.925301	0	0.46265	Inf	0	0	0	0.034631	0	0.0173155	Inf
CG3213	TRUE	FALSE	NA	NA	NA	NA	NA	NA	NA	NA	NA	NA	TRUE	FALSE	NA	NA	NA	NA	NA	NA	NA	NA	NA	NA	NA	0	2.03041	0	0.925301	0	1.47786	Inf	0	0.0553516	0	0.0251948	0	0.0402732	Inf
CG3216	TRUE	FALSE	NA	NA	NA	NA	NA	NA	NA	NA	NA	NA	TRUE	FALSE	NA	NA	NA	NA	NA	NA	NA	NA	NA	NA	NA	0	1.04722	0	1.90896	0	1.47809	Inf	0	0.0195127	0	0.0355269	0	0.0275198	Inf
CG32182	TRUE	FALSE	NA	NA	NA	NA	NA	NA	NA	NA	NA	NA	TRUE	FALSE	NA	NA	NA	NA	NA	NA	NA	NA	NA	NA	NA	0	0	0	0.925301	0	0.46265	Inf	0	0	0	0.0441873	0	0.0220936	Inf
CG32189	TRUE	FALSE	NA	NA	NA	NA	NA	NA	NA	NA	NA	NA	TRUE	FALSE	NA	NA	NA	NA	NA	NA	NA	NA	NA	NA	NA	0	0	0	0.925301	0	0.46265	Inf	0	0	0	0.237774	0	0.118887	Inf
CG32198	TRUE	FALSE	NA	NA	NA	NA	NA	NA	NA	NA	NA	NA	TRUE	FALSE	NA	NA	NA	NA	NA	NA	NA	NA	NA	NA	NA	0	0	0	0.925301	0	0.46265	Inf	0	0	0	0.202678	0	0.101339	Inf
CG32213	TRUE	FALSE	NA	NA	NA	NA	NA	NA	NA	NA	NA	NA	TRUE	FALSE	NA	NA	NA	NA	NA	NA	NA	NA	NA	NA	NA	0	1.02658	0	0	0	0.513288	Inf	0	0.19938	0	0	0	0.0996898	Inf
CG32219	TRUE	FALSE	NA	NA	NA	NA	NA	NA	NA	NA	NA	NA	TRUE	FALSE	NA	NA	NA	NA	NA	NA	NA	NA	NA	NA	NA	0	0	0	0.925301	0	0.46265	Inf	0	0	0	0.0688282	0	0.0344141	Inf
CG32263	TRUE	FALSE	NA	NA	NA	NA	NA	NA	NA	NA	NA	NA	TRUE	FALSE	NA	NA	NA	NA	NA	NA	NA	NA	NA	NA	NA	0	1.0152	0	0.925301	0	0.970253	Inf	0	0.0998902	0	0.0909355	0	0.0954129	Inf
CG32269	TRUE	FALSE	NA	NA	NA	NA	NA	NA	NA	NA	NA	NA	TRUE	FALSE	NA	NA	NA	NA	NA	NA	NA	NA	NA	NA	NA	0	1.44433	0	0	0	0.722163	Inf	0	0.0605758	0	0	0	0.0302879	Inf
CG32301	TRUE	FALSE	NA	NA	NA	NA	NA	NA	NA	NA	NA	NA	TRUE	FALSE	NA	NA	NA	NA	NA	NA	NA	NA	NA	NA	NA	0	0	0	1.85954	0	0.929769	Inf	0	0	0	0.0332469	0	0.0166234	Inf
CG32305	TRUE	FALSE	NA	NA	NA	NA	NA	NA	NA	NA	NA	NA	TRUE	FALSE	NA	NA	NA	NA	NA	NA	NA	NA	NA	NA	NA	0	1.0152	0	0	0	0.507602	Inf	0	0.018305	0	0	0	0.00915249	Inf
CG32437	TRUE	FALSE	NA	NA	NA	NA	NA	NA	NA	NA	NA	NA	TRUE	FALSE	NA	NA	NA	NA	NA	NA	NA	NA	NA	NA	NA	0	1.0152	0	0	0	0.507602	Inf	0	0.0303793	0	0	0	0.0151896	Inf
CG32445	TRUE	FALSE	NA	NA	NA	NA	NA	NA	NA	NA	NA	NA	TRUE	FALSE	NA	NA	NA	NA	NA	NA	NA	NA	NA	NA	NA	0	1.0152	0	0	0	0.507602	Inf	0	0.0523273	0	0	0	0.0261637	Inf
CG32459	TRUE	FALSE	NA	NA	NA	NA	NA	NA	NA	NA	NA	NA	TRUE	FALSE	NA	NA	NA	NA	NA	NA	NA	NA	NA	NA	NA	0	1.0152	0	0.925301	0	0.970253	Inf	0	0.0512603	0	0.0466651	0	0.0489627	Inf
CG32462	TRUE	FALSE	NA	NA	NA	NA	NA	NA	NA	NA	NA	NA	TRUE	FALSE	NA	NA	NA	NA	NA	NA	NA	NA	NA	NA	NA	0	0	0	0.925301	0	0.46265	Inf	0	0	0	0.05261	0	0.026305	Inf
CG32488	TRUE	FALSE	NA	NA	NA	NA	NA	NA	NA	NA	NA	NA	TRUE	FALSE	NA	NA	NA	NA	NA	NA	NA	NA	NA	NA	NA	0	0	0	1.03808	0	0.519038	Inf	0	0	0	0.065309	0	0.0326545	Inf
CG32507	TRUE	FALSE	NA	NA	NA	NA	NA	NA	NA	NA	NA	NA	TRUE	FALSE	NA	NA	NA	NA	NA	NA	NA	NA	NA	NA	NA	0	1.0152	0	0	0	0.507602	Inf	0	0.0747628	0	0	0	0.0373814	Inf
CG32532	TRUE	FALSE	NA	NA	NA	NA	NA	NA	NA	NA	NA	NA	TRUE	FALSE	NA	NA	NA	NA	NA	NA	NA	NA	NA	NA	NA	0	1.08036	0	1.96441	0	1.52239	Inf	0	0.0148315	0	0.0269357	0	0.0208836	Inf
CG32591	TRUE	FALSE	NA	NA	NA	NA	NA	NA	NA	NA	NA	NA	TRUE	FALSE	NA	NA	NA	NA	NA	NA	NA	NA	NA	NA	NA	0	0.934988	0	1.01214	0	0.973562	Inf	0	0.039076	0	0.0422498	0	0.0406629	Inf
CG32633	TRUE	FALSE	NA	NA	NA	NA	NA	NA	NA	NA	NA	NA	TRUE	FALSE	NA	NA	NA	NA	NA	NA	NA	NA	NA	NA	NA	0	0	0	6.10859	0	3.05429	Inf	0	0	0	0.36278	0	0.18139	Inf
CG32668	TRUE	FALSE	NA	NA	NA	NA	NA	NA	NA	NA	NA	NA	TRUE	FALSE	NA	NA	NA	NA	NA	NA	NA	NA	NA	NA	NA	0	0	0	0.925301	0	0.46265	Inf	0	0	0	0.0221738	0	0.0110869	Inf
CG32695	TRUE	FALSE	NA	NA	NA	NA	NA	NA	NA	NA	NA	NA	TRUE	FALSE	NA	NA	NA	NA	NA	NA	NA	NA	NA	NA	NA	0	3.04561	0	0.925301	0	1.98546	Inf	0	0.578284	0	0.175481	0	0.376883	Inf
CG32726	TRUE	FALSE	NA	NA	NA	NA	NA	NA	NA	NA	NA	NA	TRUE	FALSE	NA	NA	NA	NA	NA	NA	NA	NA	NA	NA	NA	0	0.741353	0	2.93464	0	1.838	Inf	0	0.232952	0	0.921039	0	0.576996	Inf
CG32750	TRUE	FALSE	NA	NA	NA	NA	NA	NA	NA	NA	NA	NA	TRUE	FALSE	NA	NA	NA	NA	NA	NA	NA	NA	NA	NA	NA	0	3.04561	0	1.8506	0	2.44811	Inf	0	0.125173	0	0.0759678	0	0.10057	Inf
CG32793	TRUE	FALSE	NA	NA	NA	NA	NA	NA	NA	NA	NA	NA	TRUE	FALSE	NA	NA	NA	NA	NA	NA	NA	NA	NA	NA	NA	0	2.03041	0	2.7759	0	2.40316	Inf	0	0.0484994	0	0.0662274	0	0.0573634	Inf
CG32819	TRUE	FALSE	NA	NA	NA	NA	NA	NA	NA	NA	NA	NA	TRUE	FALSE	NA	NA	NA	NA	NA	NA	NA	NA	NA	NA	NA	0	1.26104	0	2.06115	0	1.66109	Inf	0	0.0391655	0	0.0639388	0	0.0515522	Inf
CG32820	TRUE	FALSE	NA	NA	NA	NA	NA	NA	NA	NA	NA	NA	TRUE	FALSE	NA	NA	NA	NA	NA	NA	NA	NA	NA	NA	NA	0	1.33584	0	4.48895	0	2.91239	Inf	0	0.0391655	0	0.131454	0	0.08531	Inf
CG32945	TRUE	FALSE	NA	NA	NA	NA	NA	NA	NA	NA	NA	NA	TRUE	FALSE	NA	NA	NA	NA	NA	NA	NA	NA	NA	NA	NA	0	0	0	0.925301	0	0.46265	Inf	0	0	0	0.108334	0	0.0541668	Inf
CG32984	TRUE	FALSE	NA	NA	NA	NA	NA	NA	NA	NA	NA	NA	TRUE	FALSE	NA	NA	NA	NA	NA	NA	NA	NA	NA	NA	NA	0	0	0	0.925301	0	0.46265	Inf	0	0	0	0.0316386	0	0.0158193	Inf
CG33109	TRUE	FALSE	NA	NA	NA	NA	NA	NA	NA	NA	NA	NA	TRUE	FALSE	NA	NA	NA	NA	NA	NA	NA	NA	NA	NA	NA	0	0	0	46.265	0	23.1325	Inf	0	0	0	3.32475	0	1.66238	Inf
CG33281	TRUE	FALSE	NA	NA	NA	NA	NA	NA	NA	NA	NA	NA	TRUE	FALSE	NA	NA	NA	NA	NA	NA	NA	NA	NA	NA	NA	0	3.04561	0	1.8506	0	2.44811	Inf	0	0.129749	0	0.0787451	0	0.104247	Inf
CG33290	TRUE	FALSE	NA	NA	NA	NA	NA	NA	NA	NA	NA	NA	TRUE	FALSE	NA	NA	NA	NA	NA	NA	NA	NA	NA	NA	NA	0	1.0152	0	1.8506	0	1.4329	Inf	0	0.132602	0	0.24143	0	0.187016	Inf
CG33296	TRUE	FALSE	NA	NA	NA	NA	NA	NA	NA	NA	NA	NA	TRUE	FALSE	NA	NA	NA	NA	NA	NA	NA	NA	NA	NA	NA	0	0	0	0.944865	0	0.472433	Inf	0	0	0	0.0327127	0	0.0163564	Inf
CG3330	TRUE	FALSE	NA	NA	NA	NA	NA	NA	NA	NA	NA	NA	TRUE	FALSE	NA	NA	NA	NA	NA	NA	NA	NA	NA	NA	NA	0	1.0152	0	0	0	0.507602	Inf	0	0.0608814	0	0	0	0.0304407	Inf
CG33306	TRUE	FALSE	NA	NA	NA	NA	NA	NA	NA	NA	NA	NA	TRUE	FALSE	NA	NA	NA	NA	NA	NA	NA	NA	NA	NA	NA	0	1.0152	0	0	0	0.507602	Inf	0	0.100389	0	0	0	0.0501944	Inf
CG33309	TRUE	FALSE	NA	NA	NA	NA	NA	NA	NA	NA	NA	NA	TRUE	FALSE	NA	NA	NA	NA	NA	NA	NA	NA	NA	NA	NA	0	1.0152	0	0	0	0.507602	Inf	0	0.0381856	0	0	0	0.0190928	Inf
CG3332	TRUE	FALSE	NA	NA	NA	NA	NA	NA	NA	NA	NA	NA	TRUE	FALSE	NA	NA	NA	NA	NA	NA	NA	NA	NA	NA	NA	0	0.924608	0	8.42722	0	4.67591	Inf	0	0.0245802	0	0.223766	0	0.124173	Inf
CG33325	TRUE	FALSE	NA	NA	NA	NA	NA	NA	NA	NA	NA	NA	TRUE	FALSE	NA	NA	NA	NA	NA	NA	NA	NA	NA	NA	NA	0	1.0152	0	0	0	0.507602	Inf	0	0.0787645	0	0	0	0.0393822	Inf
CG33346	TRUE	FALSE	NA	NA	NA	NA	NA	NA	NA	NA	NA	NA	TRUE	FALSE	NA	NA	NA	NA	NA	NA	NA	NA	NA	NA	NA	0	0	0	13.8795	0	6.93976	Inf	0	0	0	0.918476	0	0.459238	Inf
CG33458	TRUE	FALSE	NA	NA	NA	NA	NA	NA	NA	NA	NA	NA	TRUE	FALSE	NA	NA	NA	NA	NA	NA	NA	NA	NA	NA	NA	0	0	0	0.925301	0	0.46265	Inf	0	0	0	0.078802	0	0.039401	Inf
CG33460	TRUE	FALSE	NA	NA	NA	NA	NA	NA	NA	NA	NA	NA	TRUE	FALSE	NA	NA	NA	NA	NA	NA	NA	NA	NA	NA	NA	0	3.04561	0	0.925301	0	1.98546	Inf	0	0.242304	0	0.0735274	0	0.157915	Inf
CG33461	TRUE	FALSE	NA	NA	NA	NA	NA	NA	NA	NA	NA	NA	TRUE	FALSE	NA	NA	NA	NA	NA	NA	NA	NA	NA	NA	NA	0	0	0	0.925301	0	0.46265	Inf	0	0	0	0.082594	0	0.041297	Inf
CG33509	TRUE	FALSE	NA	NA	NA	NA	NA	NA	NA	NA	NA	NA	TRUE	FALSE	NA	NA	NA	NA	NA	NA	NA	NA	NA	NA	NA	0	1.0152	0	2.7759	0	1.89555	Inf	0	0.0500277	0	0.136629	0	0.0933282	Inf
CG33510	TRUE	FALSE	NA	NA	NA	NA	NA	NA	NA	NA	NA	NA	TRUE	FALSE	NA	NA	NA	NA	NA	NA	NA	NA	NA	NA	NA	0	2.03041	0	1.8506	0	1.94051	Inf	0	0.0882712	0	0.0803581	0	0.0843146	Inf
CG3355	TRUE	FALSE	NA	NA	NA	NA	NA	NA	NA	NA	NA	NA	TRUE	FALSE	NA	NA	NA	NA	NA	NA	NA	NA	NA	NA	NA	0	0	0	1.08158	0	0.540791	Inf	0	0	0	0.0612317	0	0.0306159	Inf
CG33640	TRUE	FALSE	NA	NA	NA	NA	NA	NA	NA	NA	NA	NA	TRUE	FALSE	NA	NA	NA	NA	NA	NA	NA	NA	NA	NA	NA	0	1.0152	0	0	0	0.507602	Inf	0	0.178504	0	0	0	0.0892518	Inf
CG33643	TRUE	FALSE	NA	NA	NA	NA	NA	NA	NA	NA	NA	NA	TRUE	FALSE	NA	NA	NA	NA	NA	NA	NA	NA	NA	NA	NA	0	0	0	0.925301	0	0.46265	Inf	0	0	0	0.162502	0	0.0812508	Inf
CG33644	TRUE	FALSE	NA	NA	NA	NA	NA	NA	NA	NA	NA	NA	TRUE	FALSE	NA	NA	NA	NA	NA	NA	NA	NA	NA	NA	NA	0	1.0152	0	0	0	0.507602	Inf	0	0.21703	0	0	0	0.108515	Inf
CG33658	TRUE	FALSE	NA	NA	NA	NA	NA	NA	NA	NA	NA	NA	TRUE	FALSE	NA	NA	NA	NA	NA	NA	NA	NA	NA	NA	NA	0	0	0	1.8506	0	0.925301	Inf	0	0	0	0.316573	0	0.158287	Inf
CG33696	TRUE	FALSE	NA	NA	NA	NA	NA	NA	NA	NA	NA	NA	TRUE	FALSE	NA	NA	NA	NA	NA	NA	NA	NA	NA	NA	NA	0	2.03041	0	1.8506	0	1.94051	Inf	0	0.0481702	0	0.043852	0	0.0460111	Inf
CG33757	TRUE	FALSE	NA	NA	NA	NA	NA	NA	NA	NA	NA	NA	TRUE	FALSE	NA	NA	NA	NA	NA	NA	NA	NA	NA	NA	NA	0	0	0	0.925301	0	0.46265	Inf	0	0	0	0.162502	0	0.0812508	Inf
CG33768	TRUE	FALSE	NA	NA	NA	NA	NA	NA	NA	NA	NA	NA	TRUE	FALSE	NA	NA	NA	NA	NA	NA	NA	NA	NA	NA	NA	0	0	0	0.925301	0	0.46265	Inf	0	0	0	0.180084	0	0.090042	Inf
CG33775	TRUE	FALSE	NA	NA	NA	NA	NA	NA	NA	NA	NA	NA	TRUE	FALSE	NA	NA	NA	NA	NA	NA	NA	NA	NA	NA	NA	0	1.0152	0	0	0	0.507602	Inf	0	0.172383	0	0	0	0.0861917	Inf
CG33919	TRUE	FALSE	NA	NA	NA	NA	NA	NA	NA	NA	NA	NA	TRUE	FALSE	NA	NA	NA	NA	NA	NA	NA	NA	NA	NA	NA	0	2.03041	0	1.8506	0	1.94051	Inf	0	0.320075	0	0.291382	0	0.305728	Inf
CG33965	TRUE	FALSE	NA	NA	NA	NA	NA	NA	NA	NA	NA	NA	TRUE	FALSE	NA	NA	NA	NA	NA	NA	NA	NA	NA	NA	NA	0	0	0	2.7759	0	1.38795	Inf	0	0	0	0.199244	0	0.099622	Inf
CG33985	TRUE	FALSE	NA	NA	NA	NA	NA	NA	NA	NA	NA	NA	TRUE	FALSE	NA	NA	NA	NA	NA	NA	NA	NA	NA	NA	NA	0	1.0152	0	0	0	0.507602	Inf	0	0.0912763	0	0	0	0.0456382	Inf
CG33993	TRUE	FALSE	NA	NA	NA	NA	NA	NA	NA	NA	NA	NA	TRUE	FALSE	NA	NA	NA	NA	NA	NA	NA	NA	NA	NA	NA	0	0.764741	0	0	0	0.38237	Inf	0	0.027362	0	0	0	0.013681	Inf
CG34005	TRUE	FALSE	NA	NA	NA	NA	NA	NA	NA	NA	NA	NA	TRUE	FALSE	NA	NA	NA	NA	NA	NA	NA	NA	NA	NA	NA	0	0	0	1.98066	0	0.990329	Inf	0	0	0	0.253112	0	0.126556	Inf
CG34011	TRUE	FALSE	NA	NA	NA	NA	NA	NA	NA	NA	NA	NA	TRUE	FALSE	NA	NA	NA	NA	NA	NA	NA	NA	NA	NA	NA	0	1.0152	0	0	0	0.507602	Inf	0	0.0677144	0	0	0	0.0338572	Inf
CG34012	TRUE	FALSE	NA	NA	NA	NA	NA	NA	NA	NA	NA	NA	TRUE	FALSE	NA	NA	NA	NA	NA	NA	NA	NA	NA	NA	NA	0	6.09123	0	0	0	3.04561	Inf	0	1.02842	0	0	0	0.514212	Inf
CG34021	TRUE	FALSE	NA	NA	NA	NA	NA	NA	NA	NA	NA	NA	TRUE	FALSE	NA	NA	NA	NA	NA	NA	NA	NA	NA	NA	NA	0	3.04561	0	0.925301	0	1.98546	Inf	0	0.32264	0	0.0979057	0	0.210273	Inf
CG34026	TRUE	FALSE	NA	NA	NA	NA	NA	NA	NA	NA	NA	NA	TRUE	FALSE	NA	NA	NA	NA	NA	NA	NA	NA	NA	NA	NA	0	0	0	34.6423	0	17.3211	Inf	0	0	0	5.29987	0	2.64993	Inf
CG34027	TRUE	FALSE	NA	NA	NA	NA	NA	NA	NA	NA	NA	NA	TRUE	FALSE	NA	NA	NA	NA	NA	NA	NA	NA	NA	NA	NA	0	1.0152	0	0.925301	0	0.970253	Inf	0	0.0138347	0	0.0125945	0	0.0132146	Inf
CG34040	TRUE	FALSE	NA	NA	NA	NA	NA	NA	NA	NA	NA	NA	TRUE	FALSE	NA	NA	NA	NA	NA	NA	NA	NA	NA	NA	NA	0	0	0	3.7012	0	1.8506	Inf	0	0	0	0.281306	0	0.140653	Inf
CG34050	TRUE	FALSE	NA	NA	NA	NA	NA	NA	NA	NA	NA	NA	TRUE	FALSE	NA	NA	NA	NA	NA	NA	NA	NA	NA	NA	NA	0	1.0152	0	0	0	0.507602	Inf	0	0.1551	0	0	0	0.0775502	Inf
CG34113	TRUE	FALSE	NA	NA	NA	NA	NA	NA	NA	NA	NA	NA	TRUE	FALSE	NA	NA	NA	NA	NA	NA	NA	NA	NA	NA	NA	0	3.49732	0	2.12507	0	2.81119	Inf	0	0.0282723	0	0.0171586	0	0.0227154	Inf
CG34127	TRUE	FALSE	NA	NA	NA	NA	NA	NA	NA	NA	NA	NA	TRUE	FALSE	NA	NA	NA	NA	NA	NA	NA	NA	NA	NA	NA	0	1.10943	0	1.01118	0	1.06031	Inf	0	0.0110886	0	0.0100946	0	0.0105916	Inf
CG34169	TRUE	FALSE	NA	NA	NA	NA	NA	NA	NA	NA	NA	NA	TRUE	FALSE	NA	NA	NA	NA	NA	NA	NA	NA	NA	NA	NA	0	1.0152	0	0.925301	0	0.970253	Inf	0	0.141629	0	0.128933	0	0.135281	Inf
CG34173	TRUE	FALSE	NA	NA	NA	NA	NA	NA	NA	NA	NA	NA	TRUE	FALSE	NA	NA	NA	NA	NA	NA	NA	NA	NA	NA	NA	0	2.03041	0	0	0	1.0152	Inf	0	0.558651	0	0	0	0.279326	Inf
CG34176	TRUE	FALSE	NA	NA	NA	NA	NA	NA	NA	NA	NA	NA	TRUE	FALSE	NA	NA	NA	NA	NA	NA	NA	NA	NA	NA	NA	0	0	0	2.7759	0	1.38795	Inf	0	0	0	0.815712	0	0.407856	Inf
CG34178	TRUE	FALSE	NA	NA	NA	NA	NA	NA	NA	NA	NA	NA	TRUE	FALSE	NA	NA	NA	NA	NA	NA	NA	NA	NA	NA	NA	0	0	0	2.15696	0	1.07848	Inf	0	0	0	0.18746	0	0.0937298	Inf
CG34199	TRUE	FALSE	NA	NA	NA	NA	NA	NA	NA	NA	NA	NA	TRUE	FALSE	NA	NA	NA	NA	NA	NA	NA	NA	NA	NA	NA	0	1.0152	0	0	0	0.507602	Inf	0	0.121887	0	0	0	0.0609433	Inf
CG34205	TRUE	FALSE	NA	NA	NA	NA	NA	NA	NA	NA	NA	NA	TRUE	FALSE	NA	NA	NA	NA	NA	NA	NA	NA	NA	NA	NA	0	2.03041	0	0.925301	0	1.47786	Inf	0	0.158564	0	0.0721747	0	0.115369	Inf
CG34208	TRUE	FALSE	NA	NA	NA	NA	NA	NA	NA	NA	NA	NA	TRUE	FALSE	NA	NA	NA	NA	NA	NA	NA	NA	NA	NA	NA	0	0	0	0.925301	0	0.46265	Inf	0	0	0	0.303411	0	0.151706	Inf
CG34212	TRUE	FALSE	NA	NA	NA	NA	NA	NA	NA	NA	NA	NA	TRUE	FALSE	NA	NA	NA	NA	NA	NA	NA	NA	NA	NA	NA	0	0	0	13.5993	0	6.79965	Inf	0	0	0	6.69427	0	3.34713	Inf
CG34232	TRUE	FALSE	NA	NA	NA	NA	NA	NA	NA	NA	NA	NA	TRUE	FALSE	NA	NA	NA	NA	NA	NA	NA	NA	NA	NA	NA	0	8.1378	0	9.53632	0	8.83706	Inf	0	0.839636	0	0.982757	0	0.911196	Inf
CG34236	TRUE	FALSE	NA	NA	NA	NA	NA	NA	NA	NA	NA	NA	TRUE	FALSE	NA	NA	NA	NA	NA	NA	NA	NA	NA	NA	NA	0	1.35475	0	0.739867	0	1.04731	Inf	0	0.134975	0	0.0736259	0	0.104301	Inf
CG34244	TRUE	FALSE	NA	NA	NA	NA	NA	NA	NA	NA	NA	NA	TRUE	FALSE	NA	NA	NA	NA	NA	NA	NA	NA	NA	NA	NA	0	3.30763	0	0	0	1.65382	Inf	0	0.432505	0	0	0	0.216253	Inf
CG34273	TRUE	FALSE	NA	NA	NA	NA	NA	NA	NA	NA	NA	NA	TRUE	FALSE	NA	NA	NA	NA	NA	NA	NA	NA	NA	NA	NA	0	0	0	0.925301	0	0.46265	Inf	0	0	0	0.222372	0	0.111186	Inf
CG34276	TRUE	FALSE	NA	NA	NA	NA	NA	NA	NA	NA	NA	NA	TRUE	FALSE	NA	NA	NA	NA	NA	NA	NA	NA	NA	NA	NA	0	0.583741	0	0.532046	0	0.557894	Inf	0	0.0372428	0	0.0339041	0	0.0355735	Inf
CG34283	TRUE	FALSE	NA	NA	NA	NA	NA	NA	NA	NA	NA	NA	TRUE	FALSE	NA	NA	NA	NA	NA	NA	NA	NA	NA	NA	NA	0	0	0	0.925301	0	0.46265	Inf	0	0	0	0.149254	0	0.074627	Inf
CG34284	TRUE	FALSE	NA	NA	NA	NA	NA	NA	NA	NA	NA	NA	TRUE	FALSE	NA	NA	NA	NA	NA	NA	NA	NA	NA	NA	NA	0	4.06082	0	4.6265	0	4.34366	Inf	0	0.751829	0	0.855539	0	0.803684	Inf
CG34286	TRUE	FALSE	NA	NA	NA	NA	NA	NA	NA	NA	NA	NA	TRUE	FALSE	NA	NA	NA	NA	NA	NA	NA	NA	NA	NA	NA	0	0	0	2.32912	0	1.16456	Inf	0	0	0	0.342215	0	0.171108	Inf
CG34290	TRUE	FALSE	NA	NA	NA	NA	NA	NA	NA	NA	NA	NA	TRUE	FALSE	NA	NA	NA	NA	NA	NA	NA	NA	NA	NA	NA	0	0	0	1.8506	0	0.925301	Inf	0	0	0	0.149863	0	0.0749317	Inf
CG34291	TRUE	FALSE	NA	NA	NA	NA	NA	NA	NA	NA	NA	NA	TRUE	FALSE	NA	NA	NA	NA	NA	NA	NA	NA	NA	NA	NA	0	1.0152	0	0.925301	0	0.970253	Inf	0	0.78568	0	0.715247	0	0.750463	Inf
CG34301	TRUE	FALSE	NA	NA	NA	NA	NA	NA	NA	NA	NA	NA	TRUE	FALSE	NA	NA	NA	NA	NA	NA	NA	NA	NA	NA	NA	0	0	0	0.925301	0	0.46265	Inf	0	0	0	0.499302	0	0.249651	Inf
CG34302	TRUE	FALSE	NA	NA	NA	NA	NA	NA	NA	NA	NA	NA	TRUE	FALSE	NA	NA	NA	NA	NA	NA	NA	NA	NA	NA	NA	0	1.0152	0	0	0	0.507602	Inf	0	0.0963797	0	0	0	0.0481898	Inf
CG34330	TRUE	FALSE	NA	NA	NA	NA	NA	NA	NA	NA	NA	NA	TRUE	FALSE	NA	NA	NA	NA	NA	NA	NA	NA	NA	NA	NA	0	0	0	16.2358	0	8.11792	Inf	0	0	0	2.09739	0	1.04869	Inf
CG34353	TRUE	FALSE	NA	NA	NA	NA	NA	NA	NA	NA	NA	NA	TRUE	FALSE	NA	NA	NA	NA	NA	NA	NA	NA	NA	NA	NA	0	1.0152	0	2.7352	0	1.8752	Inf	0	0.0125563	0	0.0337894	0	0.0231728	Inf
CG34362	TRUE	FALSE	NA	NA	NA	NA	NA	NA	NA	NA	NA	NA	TRUE	FALSE	NA	NA	NA	NA	NA	NA	NA	NA	NA	NA	NA	0	0	0	0.322764	0	0.161382	Inf	0	0	0	0.00757266	0	0.00378633	Inf
CG34367	TRUE	FALSE	NA	NA	NA	NA	NA	NA	NA	NA	NA	NA	TRUE	FALSE	NA	NA	NA	NA	NA	NA	NA	NA	NA	NA	NA	0	5.42735	0	2.7759	0	4.10163	Inf	0	0.359985	0	0.1839	0	0.271943	Inf
CG34370	TRUE	FALSE	NA	NA	NA	NA	NA	NA	NA	NA	NA	NA	TRUE	FALSE	NA	NA	NA	NA	NA	NA	NA	NA	NA	NA	NA	0	3.07648	0	0	0	1.53824	Inf	0	0.0442001	0	0	0	0.0221001	Inf
CG34411	TRUE	FALSE	NA	NA	NA	NA	NA	NA	NA	NA	NA	NA	TRUE	FALSE	NA	NA	NA	NA	NA	NA	NA	NA	NA	NA	NA	0	0	0	0.943488	0	0.471744	Inf	0	0	0	0.0205633	0	0.0102817	Inf
CG34426	TRUE	FALSE	NA	NA	NA	NA	NA	NA	NA	NA	NA	NA	TRUE	FALSE	NA	NA	NA	NA	NA	NA	NA	NA	NA	NA	NA	0	2.03041	0	2.7759	0	2.40316	Inf	0	0.146619	0	0.200212	0	0.173415	Inf
CG34427	TRUE	FALSE	NA	NA	NA	NA	NA	NA	NA	NA	NA	NA	TRUE	FALSE	NA	NA	NA	NA	NA	NA	NA	NA	NA	NA	NA	0	1.0152	0	0	0	0.507602	Inf	0	0.0905911	0	0	0	0.0452955	Inf
CG34430	TRUE	FALSE	NA	NA	NA	NA	NA	NA	NA	NA	NA	NA	TRUE	FALSE	NA	NA	NA	NA	NA	NA	NA	NA	NA	NA	NA	0	2.03041	0	0.925301	0	1.47786	Inf	0	0.202462	0	0.0921562	0	0.147309	Inf
CG34433	TRUE	FALSE	NA	NA	NA	NA	NA	NA	NA	NA	NA	NA	TRUE	FALSE	NA	NA	NA	NA	NA	NA	NA	NA	NA	NA	NA	0	1.06549	0	0	0	0.532743	Inf	0	0.0948643	0	0	0	0.0474321	Inf
CG34448	TRUE	FALSE	NA	NA	NA	NA	NA	NA	NA	NA	NA	NA	TRUE	FALSE	NA	NA	NA	NA	NA	NA	NA	NA	NA	NA	NA	0	1.0152	0	0	0	0.507602	Inf	0	0.070731	0	0	0	0.0353655	Inf
CG34451	TRUE	FALSE	NA	NA	NA	NA	NA	NA	NA	NA	NA	NA	TRUE	FALSE	NA	NA	NA	NA	NA	NA	NA	NA	NA	NA	NA	0	0	0	0.925301	0	0.46265	Inf	0	0	0	0.056449	0	0.0282245	Inf
CG34456	TRUE	FALSE	NA	NA	NA	NA	NA	NA	NA	NA	NA	NA	TRUE	FALSE	NA	NA	NA	NA	NA	NA	NA	NA	NA	NA	NA	0	0	0	1.8506	0	0.925301	Inf	0	0	0	0.25666	0	0.12833	Inf
CG3492	TRUE	FALSE	NA	NA	NA	NA	NA	NA	NA	NA	NA	NA	TRUE	FALSE	NA	NA	NA	NA	NA	NA	NA	NA	NA	NA	NA	0	0	0	0.925301	0	0.46265	Inf	0	0	0	0.0417361	0	0.0208681	Inf
CG3565	TRUE	FALSE	NA	NA	NA	NA	NA	NA	NA	NA	NA	NA	TRUE	FALSE	NA	NA	NA	NA	NA	NA	NA	NA	NA	NA	NA	0	0	0	0.925301	0	0.46265	Inf	0	0	0	0.0784643	0	0.0392321	Inf
CG3588	TRUE	FALSE	NA	NA	NA	NA	NA	NA	NA	NA	NA	NA	TRUE	FALSE	NA	NA	NA	NA	NA	NA	NA	NA	NA	NA	NA	0	3.61739	0	2.31105	0	2.96422	Inf	0	0.0946216	0	0.0603788	0	0.0775002	Inf
CG3592	TRUE	FALSE	NA	NA	NA	NA	NA	NA	NA	NA	NA	NA	TRUE	FALSE	NA	NA	NA	NA	NA	NA	NA	NA	NA	NA	NA	0	1.0152	0	0	0	0.507602	Inf	0	0.0941243	0	0	0	0.0470621	Inf
CG3598	TRUE	FALSE	NA	NA	NA	NA	NA	NA	NA	NA	NA	NA	TRUE	FALSE	NA	NA	NA	NA	NA	NA	NA	NA	NA	NA	NA	0	1.0152	0	0	0	0.507602	Inf	0	0.071148	0	0	0	0.035574	Inf
CG3635	TRUE	FALSE	NA	NA	NA	NA	NA	NA	NA	NA	NA	NA	TRUE	FALSE	NA	NA	NA	NA	NA	NA	NA	NA	NA	NA	NA	0	1.05205	0	5.75332	0	3.40269	Inf	0	0.054749	0	0.299046	0	0.176898	Inf
CG3640	TRUE	FALSE	NA	NA	NA	NA	NA	NA	NA	NA	NA	NA	TRUE	FALSE	NA	NA	NA	NA	NA	NA	NA	NA	NA	NA	NA	0	0	0	0.925301	0	0.46265	Inf	0	0	0	0.069088	0	0.034544	Inf
CG3706	TRUE	FALSE	NA	NA	NA	NA	NA	NA	NA	NA	NA	NA	TRUE	FALSE	NA	NA	NA	NA	NA	NA	NA	NA	NA	NA	NA	0	4.06082	0	0	0	2.03041	Inf	0	0.179297	0	0	0	0.0896484	Inf
CG3822	TRUE	FALSE	NA	NA	NA	NA	NA	NA	NA	NA	NA	NA	TRUE	FALSE	NA	NA	NA	NA	NA	NA	NA	NA	NA	NA	NA	0	1.0152	0	0	0	0.507602	Inf	0	0.0177034	0	0	0	0.0088517	Inf
CG3841	TRUE	FALSE	NA	NA	NA	NA	NA	NA	NA	NA	NA	NA	TRUE	FALSE	NA	NA	NA	NA	NA	NA	NA	NA	NA	NA	NA	0	0	0	17.182	0	8.59101	Inf	0	0	0	0.563482	0	0.281741	Inf
CG3906	TRUE	FALSE	NA	NA	NA	NA	NA	NA	NA	NA	NA	NA	TRUE	FALSE	NA	NA	NA	NA	NA	NA	NA	NA	NA	NA	NA	0	1.0152	0	0.925301	0	0.970253	Inf	0	0.092821	0	0.0845	0	0.0886605	Inf
CG3927	TRUE	FALSE	NA	NA	NA	NA	NA	NA	NA	NA	NA	NA	TRUE	FALSE	NA	NA	NA	NA	NA	NA	NA	NA	NA	NA	NA	0	1.31081	0	0	0	0.655403	Inf	0	0.0887256	0	0	0	0.0443628	Inf
CG40188	TRUE	FALSE	NA	NA	NA	NA	NA	NA	NA	NA	NA	NA	TRUE	FALSE	NA	NA	NA	NA	NA	NA	NA	NA	NA	NA	NA	0	0	0	3.7012	0	1.8506	Inf	0	0	0	0.143688	0	0.071844	Inf
CG40198	TRUE	FALSE	NA	NA	NA	NA	NA	NA	NA	NA	NA	NA	TRUE	FALSE	NA	NA	NA	NA	NA	NA	NA	NA	NA	NA	NA	0	0	0	1.80927	0	0.904635	Inf	0	0	0	0.116862	0	0.0584311	Inf
CG40204	TRUE	FALSE	NA	NA	NA	NA	NA	NA	NA	NA	NA	NA	TRUE	FALSE	NA	NA	NA	NA	NA	NA	NA	NA	NA	NA	NA	0	1.0152	0	0	0	0.507602	Inf	0	0.306255	0	0	0	0.153128	Inf
CG4073	TRUE	FALSE	NA	NA	NA	NA	NA	NA	NA	NA	NA	NA	TRUE	FALSE	NA	NA	NA	NA	NA	NA	NA	NA	NA	NA	NA	0	1.0152	0	0	0	0.507602	Inf	0	0.0666668	0	0	0	0.0333334	Inf
CG41343	TRUE	FALSE	NA	NA	NA	NA	NA	NA	NA	NA	NA	NA	TRUE	FALSE	NA	NA	NA	NA	NA	NA	NA	NA	NA	NA	NA	0	2.03041	0	0	0	1.0152	Inf	0	0.396936	0	0	0	0.198468	Inf
CG41434	TRUE	FALSE	NA	NA	NA	NA	NA	NA	NA	NA	NA	NA	TRUE	FALSE	NA	NA	NA	NA	NA	NA	NA	NA	NA	NA	NA	0	4.99674	0	4.73931	0	4.86802	Inf	0	0.220866	0	0.209237	0	0.215052	Inf
CG42313	TRUE	FALSE	NA	NA	NA	NA	NA	NA	NA	NA	NA	NA	TRUE	FALSE	NA	NA	NA	NA	NA	NA	NA	NA	NA	NA	NA	0	1.02371	0	0.93305	0	0.978379	Inf	0	0.0120305	0	0.0109521	0	0.0114913	Inf
CG42337	TRUE	FALSE	NA	NA	NA	NA	NA	NA	NA	NA	NA	NA	TRUE	FALSE	NA	NA	NA	NA	NA	NA	NA	NA	NA	NA	NA	0	2.5733	0	3.39994	0	2.98662	Inf	0	0.0487738	0	0.0643648	0	0.0565693	Inf
CG42449	TRUE	FALSE	NA	NA	NA	NA	NA	NA	NA	NA	NA	NA	TRUE	FALSE	NA	NA	NA	NA	NA	NA	NA	NA	NA	NA	NA	0	0	0	0.959988	0	0.479994	Inf	0	0	0	0.0579988	0	0.0289994	Inf
CG42531	TRUE	FALSE	NA	NA	NA	NA	NA	NA	NA	NA	NA	NA	TRUE	FALSE	NA	NA	NA	NA	NA	NA	NA	NA	NA	NA	NA	0	0	0	0.881458	0	0.440729	Inf	0	0	0	0.136971	0	0.0684855	Inf
CG42535	TRUE	FALSE	NA	NA	NA	NA	NA	NA	NA	NA	NA	NA	TRUE	FALSE	NA	NA	NA	NA	NA	NA	NA	NA	NA	NA	NA	0	1.0152	0	0	0	0.507602	Inf	0	0.127019	0	0	0	0.0635094	Inf
CG4259	TRUE	FALSE	NA	NA	NA	NA	NA	NA	NA	NA	NA	NA	TRUE	FALSE	NA	NA	NA	NA	NA	NA	NA	NA	NA	NA	NA	0	1.61438	0	7.35707	0	4.48573	Inf	0	0.0788674	0	0.358987	0	0.218927	Inf
CG42597	TRUE	FALSE	NA	NA	NA	NA	NA	NA	NA	NA	NA	NA	TRUE	FALSE	NA	NA	NA	NA	NA	NA	NA	NA	NA	NA	NA	0	1.0152	0	0	0	0.507602	Inf	0	0.126486	0	0	0	0.0632431	Inf
CG42662	TRUE	FALSE	NA	NA	NA	NA	NA	NA	NA	NA	NA	NA	TRUE	FALSE	NA	NA	NA	NA	NA	NA	NA	NA	NA	NA	NA	0	0.234707	0	0	0	0.117353	Inf	0	0.0116384	0	0	0	0.00581918	Inf
CG42688	TRUE	FALSE	NA	NA	NA	NA	NA	NA	NA	NA	NA	NA	TRUE	FALSE	NA	NA	NA	NA	NA	NA	NA	NA	NA	NA	NA	0	2.03735	0	0.618976	0	1.32816	Inf	0	0.308876	0	0.0937288	0	0.201302	Inf
CG42697	TRUE	FALSE	NA	NA	NA	NA	NA	NA	NA	NA	NA	NA	TRUE	FALSE	NA	NA	NA	NA	NA	NA	NA	NA	NA	NA	NA	0	2.03041	0	4.6265	0	3.32846	Inf	0	0.194939	0	0.44366	0	0.319299	Inf
CG42704	TRUE	FALSE	NA	NA	NA	NA	NA	NA	NA	NA	NA	NA	TRUE	FALSE	NA	NA	NA	NA	NA	NA	NA	NA	NA	NA	NA	0	1.0152	0	0	0	0.507602	Inf	0	0.199783	0	0	0	0.0998913	Inf
CG42714	TRUE	FALSE	NA	NA	NA	NA	NA	NA	NA	NA	NA	NA	TRUE	FALSE	NA	NA	NA	NA	NA	NA	NA	NA	NA	NA	NA	0	0	0	1.8506	0	0.925301	Inf	0	0	0	0.43592	0	0.21796	Inf
CG42728	TRUE	FALSE	NA	NA	NA	NA	NA	NA	NA	NA	NA	NA	TRUE	FALSE	NA	NA	NA	NA	NA	NA	NA	NA	NA	NA	NA	0	0	0	0.925301	0	0.46265	Inf	0	0	0	0.145305	0	0.0726527	Inf
CG42766	TRUE	FALSE	NA	NA	NA	NA	NA	NA	NA	NA	NA	NA	TRUE	FALSE	NA	NA	NA	NA	NA	NA	NA	NA	NA	NA	NA	0	0	0	1.04015	0	0.520076	Inf	0	0	0	0.128631	0	0.0643154	Inf
CG42781	TRUE	FALSE	NA	NA	NA	NA	NA	NA	NA	NA	NA	NA	TRUE	FALSE	NA	NA	NA	NA	NA	NA	NA	NA	NA	NA	NA	0	1.0152	0	0	0	0.507602	Inf	0	1.18982	0	0	0	0.594911	Inf
CG42795	TRUE	FALSE	NA	NA	NA	NA	NA	NA	NA	NA	NA	NA	TRUE	FALSE	NA	NA	NA	NA	NA	NA	NA	NA	NA	NA	NA	0	2.24945	0	3.07536	0	2.66241	Inf	0	0.0137386	0	0.0187605	0	0.0162496	Inf
CG42798	TRUE	FALSE	NA	NA	NA	NA	NA	NA	NA	NA	NA	NA	TRUE	FALSE	NA	NA	NA	NA	NA	NA	NA	NA	NA	NA	NA	0	1.06074	0	0	0	0.530369	Inf	0	0.200446	0	0	0	0.100223	Inf
CG42819	TRUE	FALSE	NA	NA	NA	NA	NA	NA	NA	NA	NA	NA	TRUE	FALSE	NA	NA	NA	NA	NA	NA	NA	NA	NA	NA	NA	0	2.03041	0	0.925301	0	1.47786	Inf	0	0.297946	0	0.135618	0	0.216782	Inf
CG42823	TRUE	FALSE	NA	NA	NA	NA	NA	NA	NA	NA	NA	NA	TRUE	FALSE	NA	NA	NA	NA	NA	NA	NA	NA	NA	NA	NA	0	1.0152	0	0.925301	0	0.970253	Inf	0	0.195257	0	0.177753	0	0.186505	Inf
CG42825	TRUE	FALSE	NA	NA	NA	NA	NA	NA	NA	NA	NA	NA	TRUE	FALSE	NA	NA	NA	NA	NA	NA	NA	NA	NA	NA	NA	0	0	0	12.9542	0	6.47711	Inf	0	0	0	0.495136	0	0.247568	Inf
CG42826	TRUE	FALSE	NA	NA	NA	NA	NA	NA	NA	NA	NA	NA	TRUE	FALSE	NA	NA	NA	NA	NA	NA	NA	NA	NA	NA	NA	0	1.0152	0	0	0	0.507602	Inf	0	0.0493323	0	0	0	0.0246661	Inf
CG42827	TRUE	FALSE	NA	NA	NA	NA	NA	NA	NA	NA	NA	NA	TRUE	FALSE	NA	NA	NA	NA	NA	NA	NA	NA	NA	NA	NA	0	2.62786	0	0.753899	0	1.69088	Inf	0	0.533934	0	0.152996	0	0.343465	Inf
CG42833	TRUE	FALSE	NA	NA	NA	NA	NA	NA	NA	NA	NA	NA	TRUE	FALSE	NA	NA	NA	NA	NA	NA	NA	NA	NA	NA	NA	0	2.03041	0	0.925301	0	1.47786	Inf	0	0.615634	0	0.280222	0	0.447928	Inf
CG43055	TRUE	FALSE	NA	NA	NA	NA	NA	NA	NA	NA	NA	NA	TRUE	FALSE	NA	NA	NA	NA	NA	NA	NA	NA	NA	NA	NA	0	0	0	13.8795	0	6.93976	Inf	0	0	0	2.03931	0	1.01965	Inf
CG43069	TRUE	FALSE	NA	NA	NA	NA	NA	NA	NA	NA	NA	NA	TRUE	FALSE	NA	NA	NA	NA	NA	NA	NA	NA	NA	NA	NA	0	1.0152	0	0	0	0.507602	Inf	0	0.278039	0	0	0	0.139019	Inf
CG43074	TRUE	FALSE	NA	NA	NA	NA	NA	NA	NA	NA	NA	NA	TRUE	FALSE	NA	NA	NA	NA	NA	NA	NA	NA	NA	NA	NA	0	4.06082	0	0.925301	0	2.49306	Inf	0	0.504886	0	0.114906	0	0.309896	Inf
CG43112	TRUE	FALSE	NA	NA	NA	NA	NA	NA	NA	NA	NA	NA	TRUE	FALSE	NA	NA	NA	NA	NA	NA	NA	NA	NA	NA	NA	0	0	0	6.47711	0	3.23855	Inf	0	0	0	2.71943	0	1.35972	Inf
CG43132	TRUE	FALSE	NA	NA	NA	NA	NA	NA	NA	NA	NA	NA	TRUE	FALSE	NA	NA	NA	NA	NA	NA	NA	NA	NA	NA	NA	0	1.0152	0	2.7759	0	1.89555	Inf	0	0.26347	0	0.719553	0	0.491511	Inf
CG43133	TRUE	FALSE	NA	NA	NA	NA	NA	NA	NA	NA	NA	NA	TRUE	FALSE	NA	NA	NA	NA	NA	NA	NA	NA	NA	NA	NA	0	2.03041	0	0	0	1.0152	Inf	0	0.352832	0	0	0	0.176416	Inf
CG43150	TRUE	FALSE	NA	NA	NA	NA	NA	NA	NA	NA	NA	NA	TRUE	FALSE	NA	NA	NA	NA	NA	NA	NA	NA	NA	NA	NA	0	1.0152	0	1.8506	0	1.4329	Inf	0	0.217814	0	0.396576	0	0.307195	Inf
CG43164	TRUE	FALSE	NA	NA	NA	NA	NA	NA	NA	NA	NA	NA	TRUE	FALSE	NA	NA	NA	NA	NA	NA	NA	NA	NA	NA	NA	0	3.86309	0	1.12264	0	2.49287	Inf	0	0.107331	0	0.0311541	0	0.0692428	Inf
CG43167	TRUE	FALSE	NA	NA	NA	NA	NA	NA	NA	NA	NA	NA	TRUE	FALSE	NA	NA	NA	NA	NA	NA	NA	NA	NA	NA	NA	0	1.0152	0	0	0	0.507602	Inf	0	0.15712	0	0	0	0.07856	Inf
CG43175	TRUE	FALSE	NA	NA	NA	NA	NA	NA	NA	NA	NA	NA	TRUE	FALSE	NA	NA	NA	NA	NA	NA	NA	NA	NA	NA	NA	0	0	0	1.21399	0	0.606993	Inf	0	0	0	0.226967	0	0.113483	Inf
CG43185	TRUE	FALSE	NA	NA	NA	NA	NA	NA	NA	NA	NA	NA	TRUE	FALSE	NA	NA	NA	NA	NA	NA	NA	NA	NA	NA	NA	0	1.04011	0	0.947997	0	0.994052	Inf	0	0.227677	0	0.207267	0	0.217472	Inf
CG43191	TRUE	FALSE	NA	NA	NA	NA	NA	NA	NA	NA	NA	NA	TRUE	FALSE	NA	NA	NA	NA	NA	NA	NA	NA	NA	NA	NA	0	0	0	1.8506	0	0.925301	Inf	0	0	0	0.134455	0	0.0672276	Inf
CG43198	TRUE	FALSE	NA	NA	NA	NA	NA	NA	NA	NA	NA	NA	TRUE	FALSE	NA	NA	NA	NA	NA	NA	NA	NA	NA	NA	NA	0	2.03041	0	2.7759	0	2.40316	Inf	0	0.363459	0	0.496315	0	0.429887	Inf
CG43200	TRUE	FALSE	NA	NA	NA	NA	NA	NA	NA	NA	NA	NA	TRUE	FALSE	NA	NA	NA	NA	NA	NA	NA	NA	NA	NA	NA	0	0	0	0.925301	0	0.46265	Inf	0	0	0	0.190714	0	0.0953571	Inf
CG43207	TRUE	FALSE	NA	NA	NA	NA	NA	NA	NA	NA	NA	NA	TRUE	FALSE	NA	NA	NA	NA	NA	NA	NA	NA	NA	NA	NA	0	0	0	1.8506	0	0.925301	Inf	0	0	0	0.429108	0	0.214554	Inf
CG43219	TRUE	FALSE	NA	NA	NA	NA	NA	NA	NA	NA	NA	NA	TRUE	FALSE	NA	NA	NA	NA	NA	NA	NA	NA	NA	NA	NA	0	1.0152	0	0	0	0.507602	Inf	0	0.129472	0	0	0	0.0647359	Inf
CG43222	TRUE	FALSE	NA	NA	NA	NA	NA	NA	NA	NA	NA	NA	TRUE	FALSE	NA	NA	NA	NA	NA	NA	NA	NA	NA	NA	NA	0	0.717234	0	0	0	0.358617	Inf	0	0.213952	0	0	0	0.106976	Inf
CG43245	TRUE	FALSE	NA	NA	NA	NA	NA	NA	NA	NA	NA	NA	TRUE	FALSE	NA	NA	NA	NA	NA	NA	NA	NA	NA	NA	NA	0	1.05736	0	0	0	0.528681	Inf	0	0.0677144	0	0	0	0.0338572	Inf
CG43246	TRUE	FALSE	NA	NA	NA	NA	NA	NA	NA	NA	NA	NA	TRUE	FALSE	NA	NA	NA	NA	NA	NA	NA	NA	NA	NA	NA	0	0	0	0.925301	0	0.46265	Inf	0	0	0	0.141196	0	0.0705982	Inf
CG4329	TRUE	FALSE	NA	NA	NA	NA	NA	NA	NA	NA	NA	NA	TRUE	FALSE	NA	NA	NA	NA	NA	NA	NA	NA	NA	NA	NA	0	0	0	0.925301	0	0.46265	Inf	0	0	0	0.0153335	0	0.00766675	Inf
CG43330	TRUE	FALSE	NA	NA	NA	NA	NA	NA	NA	NA	NA	NA	TRUE	FALSE	NA	NA	NA	NA	NA	NA	NA	NA	NA	NA	NA	0	0	0	0.925301	0	0.46265	Inf	0	0	0	0.154285	0	0.0771425	Inf
CG43347	TRUE	FALSE	NA	NA	NA	NA	NA	NA	NA	NA	NA	NA	TRUE	FALSE	NA	NA	NA	NA	NA	NA	NA	NA	NA	NA	NA	0	2.03423	0	0.927032	0	1.48063	Inf	0	0.0144247	0	0.00656572	0	0.0104952	Inf
CG43349	TRUE	FALSE	NA	NA	NA	NA	NA	NA	NA	NA	NA	NA	TRUE	FALSE	NA	NA	NA	NA	NA	NA	NA	NA	NA	NA	NA	0	0	0	4.56843	0	2.28421	Inf	0	0	0	1.241	0	0.620501	Inf
CG43397	TRUE	FALSE	NA	NA	NA	NA	NA	NA	NA	NA	NA	NA	TRUE	FALSE	NA	NA	NA	NA	NA	NA	NA	NA	NA	NA	NA	0	1.12517	0	0.421459	0	0.773317	Inf	0	0.0865619	0	0.032385	0	0.0594734	Inf
CG43406	TRUE	FALSE	NA	NA	NA	NA	NA	NA	NA	NA	NA	NA	TRUE	FALSE	NA	NA	NA	NA	NA	NA	NA	NA	NA	NA	NA	0	1.21935	0	0	0	0.609677	Inf	0	0.218603	0	0	0	0.109302	Inf
CG4341	TRUE	FALSE	NA	NA	NA	NA	NA	NA	NA	NA	NA	NA	TRUE	FALSE	NA	NA	NA	NA	NA	NA	NA	NA	NA	NA	NA	0	1.0658	0	0	0	0.532898	Inf	0	0.0167499	0	0	0	0.00837495	Inf
CG43679	TRUE	FALSE	NA	NA	NA	NA	NA	NA	NA	NA	NA	NA	TRUE	FALSE	NA	NA	NA	NA	NA	NA	NA	NA	NA	NA	NA	0	0	0	6.47881	0	3.2394	Inf	0	0	0	1.56004	0	0.780019	Inf
CG43680	TRUE	FALSE	NA	NA	NA	NA	NA	NA	NA	NA	NA	NA	TRUE	FALSE	NA	NA	NA	NA	NA	NA	NA	NA	NA	NA	NA	0	0	0	13.8795	0	6.93976	Inf	0	0	0	5.30972	0	2.65486	Inf
CG43709	TRUE	FALSE	NA	NA	NA	NA	NA	NA	NA	NA	NA	NA	TRUE	FALSE	NA	NA	NA	NA	NA	NA	NA	NA	NA	NA	NA	0	0	0	0.925301	0	0.46265	Inf	0	0	0	0.132032	0	0.066016	Inf
CG43711	TRUE	FALSE	NA	NA	NA	NA	NA	NA	NA	NA	NA	NA	TRUE	FALSE	NA	NA	NA	NA	NA	NA	NA	NA	NA	NA	NA	0	1.0152	0	0	0	0.507602	Inf	0	0.0580129	0	0	0	0.0290065	Inf
CG4372	TRUE	FALSE	NA	NA	NA	NA	NA	NA	NA	NA	NA	NA	TRUE	FALSE	NA	NA	NA	NA	NA	NA	NA	NA	NA	NA	NA	0	1.0152	0	0	0	0.507602	Inf	0	0.0606366	0	0	0	0.0303183	Inf
CG43732	TRUE	FALSE	NA	NA	NA	NA	NA	NA	NA	NA	NA	NA	TRUE	FALSE	NA	NA	NA	NA	NA	NA	NA	NA	NA	NA	NA	0	0.507602	0	1.34795	0	0.927774	Inf	0	0.00568323	0	0.0150739	0	0.0103786	Inf
CG4374	TRUE	FALSE	NA	NA	NA	NA	NA	NA	NA	NA	NA	NA	TRUE	FALSE	NA	NA	NA	NA	NA	NA	NA	NA	NA	NA	NA	0	2.21428	0	0	0	1.10714	Inf	0	0.0282723	0	0	0	0.0141362	Inf
CG43755	TRUE	FALSE	NA	NA	NA	NA	NA	NA	NA	NA	NA	NA	TRUE	FALSE	NA	NA	NA	NA	NA	NA	NA	NA	NA	NA	NA	0	1.73355	0	0	0	0.866777	Inf	0	0.0565448	0	0	0	0.0282724	Inf
CG43760	TRUE	FALSE	NA	NA	NA	NA	NA	NA	NA	NA	NA	NA	TRUE	FALSE	NA	NA	NA	NA	NA	NA	NA	NA	NA	NA	NA	0	2.03041	0	0	0	1.0152	Inf	0	0.56919	0	0	0	0.284595	Inf
CG4377	TRUE	FALSE	NA	NA	NA	NA	NA	NA	NA	NA	NA	NA	TRUE	FALSE	NA	NA	NA	NA	NA	NA	NA	NA	NA	NA	NA	0	0	0	19.4313	0	9.71566	Inf	0	0	0	1.95828	0	0.97914	Inf
CG43773	TRUE	FALSE	NA	NA	NA	NA	NA	NA	NA	NA	NA	NA	TRUE	FALSE	NA	NA	NA	NA	NA	NA	NA	NA	NA	NA	NA	0	0	0	1.8506	0	0.925301	Inf	0	0	0	1.10618	0	0.553088	Inf
CG43774	TRUE	FALSE	NA	NA	NA	NA	NA	NA	NA	NA	NA	NA	TRUE	FALSE	NA	NA	NA	NA	NA	NA	NA	NA	NA	NA	NA	0	0	0	8.32771	0	4.16385	Inf	0	0	0	2.06834	0	1.03417	Inf
CG43784	TRUE	FALSE	NA	NA	NA	NA	NA	NA	NA	NA	NA	NA	TRUE	FALSE	NA	NA	NA	NA	NA	NA	NA	NA	NA	NA	NA	0	3.9784e-05	0	4.80646e-05	0	4.39243e-05	Inf	0	5.34927e-06	0	6.45494e-06	0	5.9021e-06	Inf
CG43816	TRUE	FALSE	NA	NA	NA	NA	NA	NA	NA	NA	NA	NA	TRUE	FALSE	NA	NA	NA	NA	NA	NA	NA	NA	NA	NA	NA	0	0	0	0.559732	0	0.279866	Inf	0	0	0	0.0450205	0	0.0225103	Inf
CG43829	TRUE	FALSE	NA	NA	NA	NA	NA	NA	NA	NA	NA	NA	TRUE	FALSE	NA	NA	NA	NA	NA	NA	NA	NA	NA	NA	NA	0	0	0	0.925301	0	0.46265	Inf	0	0	0	0.224187	0	0.112094	Inf
CG43896	TRUE	FALSE	NA	NA	NA	NA	NA	NA	NA	NA	NA	NA	TRUE	FALSE	NA	NA	NA	NA	NA	NA	NA	NA	NA	NA	NA	0	0.992585	0	0	0	0.496292	Inf	0	0.00940061	0	0	0	0.00470031	Inf
CG43902	TRUE	FALSE	NA	NA	NA	NA	NA	NA	NA	NA	NA	NA	TRUE	FALSE	NA	NA	NA	NA	NA	NA	NA	NA	NA	NA	NA	0	2.03041	0	3.7012	0	2.86581	Inf	0	0.0192819	0	0.0351068	0	0.0271943	Inf
CG43982	TRUE	FALSE	NA	NA	NA	NA	NA	NA	NA	NA	NA	NA	TRUE	FALSE	NA	NA	NA	NA	NA	NA	NA	NA	NA	NA	NA	0	0	0	0.925301	0	0.46265	Inf	0	0	0	0.109413	0	0.0547064	Inf
CG4409	TRUE	FALSE	NA	NA	NA	NA	NA	NA	NA	NA	NA	NA	TRUE	FALSE	NA	NA	NA	NA	NA	NA	NA	NA	NA	NA	NA	0	0	0	2.7759	0	1.38795	Inf	0	0	0	0.222669	0	0.111334	Inf
CG44140	TRUE	FALSE	NA	NA	NA	NA	NA	NA	NA	NA	NA	NA	TRUE	FALSE	NA	NA	NA	NA	NA	NA	NA	NA	NA	NA	NA	0	0	0	0.46265	0	0.231325	Inf	0	0	0	0.116864	0	0.0584318	Inf
CG44141	TRUE	FALSE	NA	NA	NA	NA	NA	NA	NA	NA	NA	NA	TRUE	FALSE	NA	NA	NA	NA	NA	NA	NA	NA	NA	NA	NA	0	0	0	0.46265	0	0.231325	Inf	0	0	0	0.116864	0	0.0584318	Inf
CG44142	TRUE	FALSE	NA	NA	NA	NA	NA	NA	NA	NA	NA	NA	TRUE	FALSE	NA	NA	NA	NA	NA	NA	NA	NA	NA	NA	NA	0	0	0	6.47711	0	3.23855	Inf	0	0	0	2.83678	0	1.41839	Inf
CG44329	TRUE	FALSE	NA	NA	NA	NA	NA	NA	NA	NA	NA	NA	TRUE	FALSE	NA	NA	NA	NA	NA	NA	NA	NA	NA	NA	NA	0	3.04561	0	7.40241	0	5.22401	Inf	0	0.457076	0	1.1096	0	0.78334	Inf
CG44341	TRUE	FALSE	NA	NA	NA	NA	NA	NA	NA	NA	NA	NA	TRUE	FALSE	NA	NA	NA	NA	NA	NA	NA	NA	NA	NA	NA	0	1.0152	0	0.925301	0	0.970253	Inf	0	0.0807679	0	0.0735274	0	0.0771476	Inf
CG4438	TRUE	FALSE	NA	NA	NA	NA	NA	NA	NA	NA	NA	NA	TRUE	FALSE	NA	NA	NA	NA	NA	NA	NA	NA	NA	NA	NA	0	0	0	1.00216	0	0.501081	Inf	0	0	0	0.0885888	0	0.0442944	Inf
CG44438	TRUE	FALSE	NA	NA	NA	NA	NA	NA	NA	NA	NA	NA	TRUE	FALSE	NA	NA	NA	NA	NA	NA	NA	NA	NA	NA	NA	0	1.0152	0	0.925301	0	0.970253	Inf	0	0.0688739	0	0.0626996	0	0.0657868	Inf
CG4459	TRUE	FALSE	NA	NA	NA	NA	NA	NA	NA	NA	NA	NA	TRUE	FALSE	NA	NA	NA	NA	NA	NA	NA	NA	NA	NA	NA	0	3.04561	0	2.7759	0	2.91076	Inf	0	0.097155	0	0.0884455	0	0.0928003	Inf
CG4461	TRUE	FALSE	NA	NA	NA	NA	NA	NA	NA	NA	NA	NA	TRUE	FALSE	NA	NA	NA	NA	NA	NA	NA	NA	NA	NA	NA	0	0	0	0.925301	0	0.46265	Inf	0	0	0	0.082594	0	0.041297	Inf
CG45066	TRUE	FALSE	NA	NA	NA	NA	NA	NA	NA	NA	NA	NA	TRUE	FALSE	NA	NA	NA	NA	NA	NA	NA	NA	NA	NA	NA	0	1.0152	0	0	0	0.507602	Inf	0	0.0708972	0	0	0	0.0354486	Inf
CG45080	TRUE	FALSE	NA	NA	NA	NA	NA	NA	NA	NA	NA	NA	TRUE	FALSE	NA	NA	NA	NA	NA	NA	NA	NA	NA	NA	NA	0	0	0	61.0699	0	30.5349	Inf	0	0	0	41.7818	0	20.8909	Inf
CG45105	TRUE	FALSE	NA	NA	NA	NA	NA	NA	NA	NA	NA	NA	TRUE	FALSE	NA	NA	NA	NA	NA	NA	NA	NA	NA	NA	NA	0	1.13149	0	1.03129	0	1.08139	Inf	0	0.0196333	0	0.0178733	0	0.0187533	Inf
CG45154	TRUE	FALSE	NA	NA	NA	NA	NA	NA	NA	NA	NA	NA	TRUE	FALSE	NA	NA	NA	NA	NA	NA	NA	NA	NA	NA	NA	0	0	0	0.925301	0	0.46265	Inf	0	0	0	0.134621	0	0.0673105	Inf
CG4546	TRUE	FALSE	NA	NA	NA	NA	NA	NA	NA	NA	NA	NA	TRUE	FALSE	NA	NA	NA	NA	NA	NA	NA	NA	NA	NA	NA	0	4.06082	0	5.55181	0	4.80631	Inf	0	0.153325	0	0.20937	0	0.181347	Inf
CG45488	TRUE	FALSE	NA	NA	NA	NA	NA	NA	NA	NA	NA	NA	TRUE	FALSE	NA	NA	NA	NA	NA	NA	NA	NA	NA	NA	NA	0	3.9784e-05	0	4.80646e-05	0	4.39243e-05	Inf	0	5.34927e-06	0	6.45494e-06	0	5.9021e-06	Inf
CG45492	TRUE	FALSE	NA	NA	NA	NA	NA	NA	NA	NA	NA	NA	TRUE	FALSE	NA	NA	NA	NA	NA	NA	NA	NA	NA	NA	NA	0	3.04546	0	2.77571	0	2.91058	Inf	0	0.413225	0	0.376175	0	0.3947	Inf
CG45493	TRUE	FALSE	NA	NA	NA	NA	NA	NA	NA	NA	NA	NA	TRUE	FALSE	NA	NA	NA	NA	NA	NA	NA	NA	NA	NA	NA	0	3.9784e-05	0	4.80646e-05	0	4.39243e-05	Inf	0	5.34927e-06	0	6.45494e-06	0	5.9021e-06	Inf
CG45494	TRUE	FALSE	NA	NA	NA	NA	NA	NA	NA	NA	NA	NA	TRUE	FALSE	NA	NA	NA	NA	NA	NA	NA	NA	NA	NA	NA	0	3.9784e-05	0	4.80646e-05	0	4.39243e-05	Inf	0	5.34927e-06	0	6.45494e-06	0	5.9021e-06	Inf
CG45603	TRUE	FALSE	NA	NA	NA	NA	NA	NA	NA	NA	NA	NA	TRUE	FALSE	NA	NA	NA	NA	NA	NA	NA	NA	NA	NA	NA	0	1.0152	0	0	0	0.507602	Inf	0	0.187374	0	0	0	0.0936868	Inf
CG4563	TRUE	FALSE	NA	NA	NA	NA	NA	NA	NA	NA	NA	NA	TRUE	FALSE	NA	NA	NA	NA	NA	NA	NA	NA	NA	NA	NA	0	0	0	1.8506	0	0.925301	Inf	0	0	0	0.0701017	0	0.0350509	Inf
CG4597	TRUE	FALSE	NA	NA	NA	NA	NA	NA	NA	NA	NA	NA	TRUE	FALSE	NA	NA	NA	NA	NA	NA	NA	NA	NA	NA	NA	0	1.0152	0	0	0	0.507602	Inf	0	0.163951	0	0	0	0.0819757	Inf
CG4653	TRUE	FALSE	NA	NA	NA	NA	NA	NA	NA	NA	NA	NA	TRUE	FALSE	NA	NA	NA	NA	NA	NA	NA	NA	NA	NA	NA	0	0	0	12.9542	0	6.47711	Inf	0	0	0	1.10481	0	0.552407	Inf
CG4660	TRUE	FALSE	NA	NA	NA	NA	NA	NA	NA	NA	NA	NA	TRUE	FALSE	NA	NA	NA	NA	NA	NA	NA	NA	NA	NA	NA	0	1.0152	0	0	0	0.507602	Inf	0	0.056072	0	0	0	0.028036	Inf
CG4706	TRUE	FALSE	NA	NA	NA	NA	NA	NA	NA	NA	NA	NA	TRUE	FALSE	NA	NA	NA	NA	NA	NA	NA	NA	NA	NA	NA	0	1.0152	0	0	0	0.507602	Inf	0	0.0254893	0	0	0	0.0127447	Inf
CG4725	TRUE	FALSE	NA	NA	NA	NA	NA	NA	NA	NA	NA	NA	TRUE	FALSE	NA	NA	NA	NA	NA	NA	NA	NA	NA	NA	NA	0	1.0152	0	0	0	0.507602	Inf	0	0.0291747	0	0	0	0.0145873	Inf
CG4734	TRUE	FALSE	NA	NA	NA	NA	NA	NA	NA	NA	NA	NA	TRUE	FALSE	NA	NA	NA	NA	NA	NA	NA	NA	NA	NA	NA	0	0	0	11.1036	0	5.55181	Inf	0	0	0	0.811698	0	0.405849	Inf
CG4955	TRUE	FALSE	NA	NA	NA	NA	NA	NA	NA	NA	NA	NA	TRUE	FALSE	NA	NA	NA	NA	NA	NA	NA	NA	NA	NA	NA	0	0	0	0.925301	0	0.46265	Inf	0	0	0	0.0335111	0	0.0167556	Inf
CG4983	TRUE	FALSE	NA	NA	NA	NA	NA	NA	NA	NA	NA	NA	TRUE	FALSE	NA	NA	NA	NA	NA	NA	NA	NA	NA	NA	NA	0	1.16601	0	0	0	0.583003	Inf	0	0.0533452	0	0	0	0.0266726	Inf
CG5011	TRUE	FALSE	NA	NA	NA	NA	NA	NA	NA	NA	NA	NA	TRUE	FALSE	NA	NA	NA	NA	NA	NA	NA	NA	NA	NA	NA	0	0	0	6.76914	0	3.38457	Inf	0	0	0	1.35064	0	0.675318	Inf
CG5024	TRUE	FALSE	NA	NA	NA	NA	NA	NA	NA	NA	NA	NA	TRUE	FALSE	NA	NA	NA	NA	NA	NA	NA	NA	NA	NA	NA	0	0	0	0.963856	0	0.481928	Inf	0	0	0	0.123706	0	0.0618528	Inf
CG5071	TRUE	FALSE	NA	NA	NA	NA	NA	NA	NA	NA	NA	NA	TRUE	FALSE	NA	NA	NA	NA	NA	NA	NA	NA	NA	NA	NA	0	0	0	0.926493	0	0.463247	Inf	0	0	0	0.0274565	0	0.0137283	Inf
CG5084	TRUE	FALSE	NA	NA	NA	NA	NA	NA	NA	NA	NA	NA	TRUE	FALSE	NA	NA	NA	NA	NA	NA	NA	NA	NA	NA	NA	0	0	0	1.25496	0	0.627482	Inf	0	0	0	0.0956883	0	0.0478442	Inf
CG5103	TRUE	FALSE	NA	NA	NA	NA	NA	NA	NA	NA	NA	NA	TRUE	FALSE	NA	NA	NA	NA	NA	NA	NA	NA	NA	NA	NA	0	1.0152	0	0	0	0.507602	Inf	0	0.0321777	0	0	0	0.0160889	Inf
CG5107	TRUE	FALSE	NA	NA	NA	NA	NA	NA	NA	NA	NA	NA	TRUE	FALSE	NA	NA	NA	NA	NA	NA	NA	NA	NA	NA	NA	0	0	0	127.692	0	63.8458	Inf	0	0	0	15.7255	0	7.86274	Inf
CG5139	TRUE	FALSE	NA	NA	NA	NA	NA	NA	NA	NA	NA	NA	TRUE	FALSE	NA	NA	NA	NA	NA	NA	NA	NA	NA	NA	NA	0	1.0152	0	0	0	0.507602	Inf	0	0.100056	0	0	0	0.050028	Inf
CG5157	TRUE	FALSE	NA	NA	NA	NA	NA	NA	NA	NA	NA	NA	TRUE	FALSE	NA	NA	NA	NA	NA	NA	NA	NA	NA	NA	NA	0	2.03041	0	0.925301	0	1.47786	Inf	0	0.101061	0	0.0460007	0	0.0735308	Inf
CG5204	TRUE	FALSE	NA	NA	NA	NA	NA	NA	NA	NA	NA	NA	TRUE	FALSE	NA	NA	NA	NA	NA	NA	NA	NA	NA	NA	NA	0	0	0	0.925301	0	0.46265	Inf	0	0	0	0.0253694	0	0.0126847	Inf
CG5246	TRUE	FALSE	NA	NA	NA	NA	NA	NA	NA	NA	NA	NA	TRUE	FALSE	NA	NA	NA	NA	NA	NA	NA	NA	NA	NA	NA	0	0	0	9.25301	0	4.6265	Inf	0	0	0	0.61992	0	0.30996	Inf
CG5250	TRUE	FALSE	NA	NA	NA	NA	NA	NA	NA	NA	NA	NA	TRUE	FALSE	NA	NA	NA	NA	NA	NA	NA	NA	NA	NA	NA	0	1.0152	0	0	0	0.507602	Inf	0	0.0700738	0	0	0	0.0350369	Inf
CG5388	TRUE	FALSE	NA	NA	NA	NA	NA	NA	NA	NA	NA	NA	TRUE	FALSE	NA	NA	NA	NA	NA	NA	NA	NA	NA	NA	NA	0	0	0	0.685544	0	0.342772	Inf	0	0	0	0.048822	0	0.024411	Inf
CG5404	TRUE	FALSE	NA	NA	NA	NA	NA	NA	NA	NA	NA	NA	TRUE	FALSE	NA	NA	NA	NA	NA	NA	NA	NA	NA	NA	NA	0	0	0	0.925301	0	0.46265	Inf	0	0	0	0.0214298	0	0.0107149	Inf
CG5418	TRUE	FALSE	NA	NA	NA	NA	NA	NA	NA	NA	NA	NA	TRUE	FALSE	NA	NA	NA	NA	NA	NA	NA	NA	NA	NA	NA	0	3.04561	0	4.6265	0	3.83606	Inf	0	0.181545	0	0.275451	0	0.228498	Inf
CG5506	TRUE	FALSE	NA	NA	NA	NA	NA	NA	NA	NA	NA	NA	TRUE	FALSE	NA	NA	NA	NA	NA	NA	NA	NA	NA	NA	NA	0	0	0	48.1156	0	24.0578	Inf	0	0	0	6.18206	0	3.09103	Inf
CG5565	TRUE	FALSE	NA	NA	NA	NA	NA	NA	NA	NA	NA	NA	TRUE	FALSE	NA	NA	NA	NA	NA	NA	NA	NA	NA	NA	NA	0	2.03041	0	0.925301	0	1.47786	Inf	0	0.162405	0	0.0739232	0	0.118164	Inf
CG5653	TRUE	FALSE	NA	NA	NA	NA	NA	NA	NA	NA	NA	NA	TRUE	FALSE	NA	NA	NA	NA	NA	NA	NA	NA	NA	NA	NA	0	0	0	0.925301	0	0.46265	Inf	0	0	0	0.0434531	0	0.0217266	Inf
CG5681	TRUE	FALSE	NA	NA	NA	NA	NA	NA	NA	NA	NA	NA	TRUE	FALSE	NA	NA	NA	NA	NA	NA	NA	NA	NA	NA	NA	0	0	0	6.47711	0	3.23855	Inf	0	0	0	0.195263	0	0.0976314	Inf
CG5767	TRUE	FALSE	NA	NA	NA	NA	NA	NA	NA	NA	NA	NA	TRUE	FALSE	NA	NA	NA	NA	NA	NA	NA	NA	NA	NA	NA	0	0	0	26.8337	0	13.4169	Inf	0	0	0	2.43179	0	1.2159	Inf
CG5770	TRUE	FALSE	NA	NA	NA	NA	NA	NA	NA	NA	NA	NA	TRUE	FALSE	NA	NA	NA	NA	NA	NA	NA	NA	NA	NA	NA	0	0	0	3.7012	0	1.8506	Inf	0	0	0	0.309001	0	0.154501	Inf
CG5778	TRUE	FALSE	NA	NA	NA	NA	NA	NA	NA	NA	NA	NA	TRUE	FALSE	NA	NA	NA	NA	NA	NA	NA	NA	NA	NA	NA	0	0.673843	0	3.7012	0	2.18752	Inf	0	0.131733	0	0.722706	0	0.42722	Inf
CG5804	TRUE	FALSE	NA	NA	NA	NA	NA	NA	NA	NA	NA	NA	TRUE	FALSE	NA	NA	NA	NA	NA	NA	NA	NA	NA	NA	NA	0	0	0	4.6265	0	2.31325	Inf	0	0	0	1.98356	0	0.991778	Inf
CG5860	TRUE	FALSE	NA	NA	NA	NA	NA	NA	NA	NA	NA	NA	TRUE	FALSE	NA	NA	NA	NA	NA	NA	NA	NA	NA	NA	NA	0	0	0	0.925301	0	0.46265	Inf	0	0	0	0.05369	0	0.026845	Inf
CG5928	TRUE	FALSE	NA	NA	NA	NA	NA	NA	NA	NA	NA	NA	TRUE	FALSE	NA	NA	NA	NA	NA	NA	NA	NA	NA	NA	NA	0	0	0	1.01219	0	0.506096	Inf	0	0	0	0.0904861	0	0.0452431	Inf
CG5968	TRUE	FALSE	NA	NA	NA	NA	NA	NA	NA	NA	NA	NA	TRUE	FALSE	NA	NA	NA	NA	NA	NA	NA	NA	NA	NA	NA	0	1.2039	0	0	0	0.601949	Inf	0	0.157943	0	0	0	0.0789713	Inf
CG6034	TRUE	FALSE	NA	NA	NA	NA	NA	NA	NA	NA	NA	NA	TRUE	FALSE	NA	NA	NA	NA	NA	NA	NA	NA	NA	NA	NA	0	1.0152	0	0.925301	0	0.970253	Inf	0	0.0405194	0	0.036887	0	0.0387032	Inf
CG6083	TRUE	FALSE	NA	NA	NA	NA	NA	NA	NA	NA	NA	NA	TRUE	FALSE	NA	NA	NA	NA	NA	NA	NA	NA	NA	NA	NA	0	1.0152	0	0	0	0.507602	Inf	0	0.0544034	0	0	0	0.0272017	Inf
CG6154	TRUE	FALSE	NA	NA	NA	NA	NA	NA	NA	NA	NA	NA	TRUE	FALSE	NA	NA	NA	NA	NA	NA	NA	NA	NA	NA	NA	0	1.89184	0	3.44861	0	2.67022	Inf	0	0.0447577	0	0.0814907	0	0.0631242	Inf
CG6216	TRUE	FALSE	NA	NA	NA	NA	NA	NA	NA	NA	NA	NA	TRUE	FALSE	NA	NA	NA	NA	NA	NA	NA	NA	NA	NA	NA	0	1.0152	0	1.8506	0	1.4329	Inf	0	0.0690315	0	0.125686	0	0.0973589	Inf
CG6271	TRUE	FALSE	NA	NA	NA	NA	NA	NA	NA	NA	NA	NA	TRUE	FALSE	NA	NA	NA	NA	NA	NA	NA	NA	NA	NA	NA	0	0	0	3.21465	0	1.60733	Inf	0	0	0	0.218578	0	0.109289	Inf
CG6277	TRUE	FALSE	NA	NA	NA	NA	NA	NA	NA	NA	NA	NA	TRUE	FALSE	NA	NA	NA	NA	NA	NA	NA	NA	NA	NA	NA	0	0	0	44.901	0	22.4505	Inf	0	0	0	3.00821	0	1.50411	Inf
CG6283	TRUE	FALSE	NA	NA	NA	NA	NA	NA	NA	NA	NA	NA	TRUE	FALSE	NA	NA	NA	NA	NA	NA	NA	NA	NA	NA	NA	0	1.0152	0	10.1783	0	5.59676	Inf	0	0.0682506	0	0.683454	0	0.375853	Inf
CG6295	TRUE	FALSE	NA	NA	NA	NA	NA	NA	NA	NA	NA	NA	TRUE	FALSE	NA	NA	NA	NA	NA	NA	NA	NA	NA	NA	NA	0	0	0	206.342	0	103.171	Inf	0	0	0	13.7312	0	6.86561	Inf
CG6296	TRUE	FALSE	NA	NA	NA	NA	NA	NA	NA	NA	NA	NA	TRUE	FALSE	NA	NA	NA	NA	NA	NA	NA	NA	NA	NA	NA	0	1.0152	0	10.1783	0	5.59676	Inf	0	0.0312932	0	0.313367	0	0.17233	Inf
CG6304	TRUE	FALSE	NA	NA	NA	NA	NA	NA	NA	NA	NA	NA	TRUE	FALSE	NA	NA	NA	NA	NA	NA	NA	NA	NA	NA	NA	0	1.06532	0	0	0	0.532658	Inf	0	0.045466	0	0	0	0.022733	Inf
CG6333	TRUE	FALSE	NA	NA	NA	NA	NA	NA	NA	NA	NA	NA	TRUE	FALSE	NA	NA	NA	NA	NA	NA	NA	NA	NA	NA	NA	0	1.69181	0	1.54199	0	1.6169	Inf	0	0.0727787	0	0.0662544	0	0.0695166	Inf
CG6347	TRUE	FALSE	NA	NA	NA	NA	NA	NA	NA	NA	NA	NA	TRUE	FALSE	NA	NA	NA	NA	NA	NA	NA	NA	NA	NA	NA	0	0	0	0.925301	0	0.46265	Inf	0	0	0	0.0493484	0	0.0246742	Inf
CG6434	TRUE	FALSE	NA	NA	NA	NA	NA	NA	NA	NA	NA	NA	TRUE	FALSE	NA	NA	NA	NA	NA	NA	NA	NA	NA	NA	NA	0	0	0	1.40829	0	0.704143	Inf	0	0	0	0.181728	0	0.090864	Inf
CG6462	TRUE	FALSE	NA	NA	NA	NA	NA	NA	NA	NA	NA	NA	TRUE	FALSE	NA	NA	NA	NA	NA	NA	NA	NA	NA	NA	NA	0	0	0	0.925301	0	0.46265	Inf	0	0	0	0.0624856	0	0.0312428	Inf
CG6527	TRUE	FALSE	NA	NA	NA	NA	NA	NA	NA	NA	NA	NA	TRUE	FALSE	NA	NA	NA	NA	NA	NA	NA	NA	NA	NA	NA	0	0.701719	0	0	0	0.35086	Inf	0	0.0351183	0	0	0	0.0175592	Inf
CG6553	TRUE	FALSE	NA	NA	NA	NA	NA	NA	NA	NA	NA	NA	TRUE	FALSE	NA	NA	NA	NA	NA	NA	NA	NA	NA	NA	NA	0	3.04561	0	0	0	1.52281	Inf	0	0.191332	0	0	0	0.0956662	Inf
CG6592	TRUE	FALSE	NA	NA	NA	NA	NA	NA	NA	NA	NA	NA	TRUE	FALSE	NA	NA	NA	NA	NA	NA	NA	NA	NA	NA	NA	0	0	0	0.925301	0	0.46265	Inf	0	0	0	0.0390645	0	0.0195323	Inf
CG6614	TRUE	FALSE	NA	NA	NA	NA	NA	NA	NA	NA	NA	NA	TRUE	FALSE	NA	NA	NA	NA	NA	NA	NA	NA	NA	NA	NA	0	1.18517	0	1.08021	0	1.13269	Inf	0	0.0194247	0	0.0176834	0	0.0185541	Inf
CG6628	TRUE	FALSE	NA	NA	NA	NA	NA	NA	NA	NA	NA	NA	TRUE	FALSE	NA	NA	NA	NA	NA	NA	NA	NA	NA	NA	NA	0	0	0	0.925301	0	0.46265	Inf	0	0	0	0.0612317	0	0.0306159	Inf
CG6652	TRUE	FALSE	NA	NA	NA	NA	NA	NA	NA	NA	NA	NA	TRUE	FALSE	NA	NA	NA	NA	NA	NA	NA	NA	NA	NA	NA	0	1.0152	0	7.40241	0	4.20881	Inf	0	0.0295028	0	0.214864	0	0.122183	Inf
CG6661	TRUE	FALSE	NA	NA	NA	NA	NA	NA	NA	NA	NA	NA	TRUE	FALSE	NA	NA	NA	NA	NA	NA	NA	NA	NA	NA	NA	0	0	0	1.8506	0	0.925301	Inf	0	0	0	0.0618173	0	0.0309087	Inf
CG6738	TRUE	FALSE	NA	NA	NA	NA	NA	NA	NA	NA	NA	NA	TRUE	FALSE	NA	NA	NA	NA	NA	NA	NA	NA	NA	NA	NA	0	1.0152	0	0	0	0.507602	Inf	0	0.0552504	0	0	0	0.0276252	Inf
CG6788	TRUE	FALSE	NA	NA	NA	NA	NA	NA	NA	NA	NA	NA	TRUE	FALSE	NA	NA	NA	NA	NA	NA	NA	NA	NA	NA	NA	0	2.03041	0	2.7759	0	2.40316	Inf	0	0.126884	0	0.173265	0	0.150074	Inf
CG6800	TRUE	FALSE	NA	NA	NA	NA	NA	NA	NA	NA	NA	NA	TRUE	FALSE	NA	NA	NA	NA	NA	NA	NA	NA	NA	NA	NA	0	1.0152	0	0	0	0.507602	Inf	0	0.0849769	0	0	0	0.0424885	Inf
CG6839	TRUE	FALSE	NA	NA	NA	NA	NA	NA	NA	NA	NA	NA	TRUE	FALSE	NA	NA	NA	NA	NA	NA	NA	NA	NA	NA	NA	0	0	0	4.6265	0	2.31325	Inf	0	0	0	0.243893	0	0.121947	Inf
CG6938	TRUE	FALSE	NA	NA	NA	NA	NA	NA	NA	NA	NA	NA	TRUE	FALSE	NA	NA	NA	NA	NA	NA	NA	NA	NA	NA	NA	0	0	0	0.925301	0	0.46265	Inf	0	0	0	0.0135717	0	0.00678584	Inf
CG6996	TRUE	FALSE	NA	NA	NA	NA	NA	NA	NA	NA	NA	NA	TRUE	FALSE	NA	NA	NA	NA	NA	NA	NA	NA	NA	NA	NA	0	0.874671	0	0	0	0.437336	Inf	0	0.037037	0	0	0	0.0185185	Inf
CG7017	TRUE	FALSE	NA	NA	NA	NA	NA	NA	NA	NA	NA	NA	TRUE	FALSE	NA	NA	NA	NA	NA	NA	NA	NA	NA	NA	NA	0	0	0	0.980895	0	0.490448	Inf	0	0	0	0.0452056	0	0.0226028	Inf
CG7025	TRUE	FALSE	NA	NA	NA	NA	NA	NA	NA	NA	NA	NA	TRUE	FALSE	NA	NA	NA	NA	NA	NA	NA	NA	NA	NA	NA	0	1.0152	0	0	0	0.507602	Inf	0	0.0524182	0	0	0	0.0262091	Inf
CG7164	TRUE	FALSE	NA	NA	NA	NA	NA	NA	NA	NA	NA	NA	TRUE	FALSE	NA	NA	NA	NA	NA	NA	NA	NA	NA	NA	NA	0	2.2882	0	0	0	1.1441	Inf	0	0.145909	0	0	0	0.0729547	Inf
CG7191	TRUE	FALSE	NA	NA	NA	NA	NA	NA	NA	NA	NA	NA	TRUE	FALSE	NA	NA	NA	NA	NA	NA	NA	NA	NA	NA	NA	0	1.02378	0	0	0	0.511892	Inf	0	0.0424883	0	0	0	0.0212441	Inf
CG7201	TRUE	FALSE	NA	NA	NA	NA	NA	NA	NA	NA	NA	NA	TRUE	FALSE	NA	NA	NA	NA	NA	NA	NA	NA	NA	NA	NA	0	0	0	3.73863	0	1.86931	Inf	0	0	0	0.153207	0	0.0766035	Inf
CG7202	TRUE	FALSE	NA	NA	NA	NA	NA	NA	NA	NA	NA	NA	TRUE	FALSE	NA	NA	NA	NA	NA	NA	NA	NA	NA	NA	NA	0	1.0152	0	1.8506	0	1.4329	Inf	0	0.0766627	0	0.139581	0	0.108122	Inf
CG7203	TRUE	FALSE	NA	NA	NA	NA	NA	NA	NA	NA	NA	NA	TRUE	FALSE	NA	NA	NA	NA	NA	NA	NA	NA	NA	NA	NA	0	1.04884	0	0	0	0.524421	Inf	0	0.121152	0	0	0	0.0605762	Inf
CG7229	TRUE	FALSE	NA	NA	NA	NA	NA	NA	NA	NA	NA	NA	TRUE	FALSE	NA	NA	NA	NA	NA	NA	NA	NA	NA	NA	NA	0	0	0	0.925301	0	0.46265	Inf	0	0	0	0.02575	0	0.012875	Inf
CG7298	TRUE	FALSE	NA	NA	NA	NA	NA	NA	NA	NA	NA	NA	TRUE	FALSE	NA	NA	NA	NA	NA	NA	NA	NA	NA	NA	NA	0	0	0	15.7301	0	7.86506	Inf	0	0	0	0.830713	0	0.415357	Inf
CG7300	TRUE	FALSE	NA	NA	NA	NA	NA	NA	NA	NA	NA	NA	TRUE	FALSE	NA	NA	NA	NA	NA	NA	NA	NA	NA	NA	NA	0	1.05545	0	0	0	0.527726	Inf	0	0.0228882	0	0	0	0.0114441	Inf
CG7309	TRUE	FALSE	NA	NA	NA	NA	NA	NA	NA	NA	NA	NA	TRUE	FALSE	NA	NA	NA	NA	NA	NA	NA	NA	NA	NA	NA	0	1.0152	0	0	0	0.507602	Inf	0	0.0318549	0	0	0	0.0159275	Inf
CG7311	TRUE	FALSE	NA	NA	NA	NA	NA	NA	NA	NA	NA	NA	TRUE	FALSE	NA	NA	NA	NA	NA	NA	NA	NA	NA	NA	NA	0	0	0	0.930159	0	0.46508	Inf	0	0	0	0.026217	0	0.0131085	Inf
CG7335	TRUE	FALSE	NA	NA	NA	NA	NA	NA	NA	NA	NA	NA	TRUE	FALSE	NA	NA	NA	NA	NA	NA	NA	NA	NA	NA	NA	0	1.0152	0	0	0	0.507602	Inf	0	0.0581247	0	0	0	0.0290624	Inf
CG7349	TRUE	FALSE	NA	NA	NA	NA	NA	NA	NA	NA	NA	NA	TRUE	FALSE	NA	NA	NA	NA	NA	NA	NA	NA	NA	NA	NA	0	0	0	0.94201	0	0.471005	Inf	0	0	0	0.0325191	0	0.0162595	Inf
CG7366	TRUE	FALSE	NA	NA	NA	NA	NA	NA	NA	NA	NA	NA	TRUE	FALSE	NA	NA	NA	NA	NA	NA	NA	NA	NA	NA	NA	0	1.0152	0	0	0	0.507602	Inf	0	0.0528777	0	0	0	0.0264388	Inf
CG7542	TRUE	FALSE	NA	NA	NA	NA	NA	NA	NA	NA	NA	NA	TRUE	FALSE	NA	NA	NA	NA	NA	NA	NA	NA	NA	NA	NA	0	0	0	170.561	0	85.2804	Inf	0	0	0	12.735	0	6.36749	Inf
CG7634	TRUE	FALSE	NA	NA	NA	NA	NA	NA	NA	NA	NA	NA	TRUE	FALSE	NA	NA	NA	NA	NA	NA	NA	NA	NA	NA	NA	0	0	0	0.925301	0	0.46265	Inf	0	0	0	0.0324422	0	0.0162211	Inf
CG7714	TRUE	FALSE	NA	NA	NA	NA	NA	NA	NA	NA	NA	NA	TRUE	FALSE	NA	NA	NA	NA	NA	NA	NA	NA	NA	NA	NA	0	0	0	0.925301	0	0.46265	Inf	0	0	0	0.0728448	0	0.0364224	Inf
CG7798	TRUE	FALSE	NA	NA	NA	NA	NA	NA	NA	NA	NA	NA	TRUE	FALSE	NA	NA	NA	NA	NA	NA	NA	NA	NA	NA	NA	0	0	0	0.925301	0	0.46265	Inf	0	0	0	0.173267	0	0.0866334	Inf
CG7856	TRUE	FALSE	NA	NA	NA	NA	NA	NA	NA	NA	NA	NA	TRUE	FALSE	NA	NA	NA	NA	NA	NA	NA	NA	NA	NA	NA	0	3.04561	0	0.925301	0	1.98546	Inf	0	0.0903643	0	0.0274212	0	0.0588928	Inf
CG8093	TRUE	FALSE	NA	NA	NA	NA	NA	NA	NA	NA	NA	NA	TRUE	FALSE	NA	NA	NA	NA	NA	NA	NA	NA	NA	NA	NA	0	0	0	3.04616	0	1.52308	Inf	0	0	0	0.145176	0	0.0725878	Inf
CG8213	TRUE	FALSE	NA	NA	NA	NA	NA	NA	NA	NA	NA	NA	TRUE	FALSE	NA	NA	NA	NA	NA	NA	NA	NA	NA	NA	NA	0	2.12153	0	0.966825	0	1.54418	Inf	0	0.0202053	0	0.00919701	0	0.0147012	Inf
CG8407	TRUE	FALSE	NA	NA	NA	NA	NA	NA	NA	NA	NA	NA	TRUE	FALSE	NA	NA	NA	NA	NA	NA	NA	NA	NA	NA	NA	0	1.80779	0	1.05525	0	1.43152	Inf	0	0.228105	0	0.132991	0	0.180548	Inf
CG8501	TRUE	FALSE	NA	NA	NA	NA	NA	NA	NA	NA	NA	NA	TRUE	FALSE	NA	NA	NA	NA	NA	NA	NA	NA	NA	NA	NA	0	1.54406	0	0	0	0.772032	Inf	0	0.140312	0	0	0	0.0701558	Inf
CG8519	TRUE	FALSE	NA	NA	NA	NA	NA	NA	NA	NA	NA	NA	TRUE	FALSE	NA	NA	NA	NA	NA	NA	NA	NA	NA	NA	NA	0	0.742091	0	0	0	0.371046	Inf	0	0.0546498	0	0	0	0.0273249	Inf
CG8560	TRUE	FALSE	NA	NA	NA	NA	NA	NA	NA	NA	NA	NA	TRUE	FALSE	NA	NA	NA	NA	NA	NA	NA	NA	NA	NA	NA	0	0	0	1.01987	0	0.509935	Inf	0	0	0	0.0483919	0	0.0241959	Inf
CG8562	TRUE	FALSE	NA	NA	NA	NA	NA	NA	NA	NA	NA	NA	TRUE	FALSE	NA	NA	NA	NA	NA	NA	NA	NA	NA	NA	NA	0	0	0	0.925301	0	0.46265	Inf	0	0	0	0.0427763	0	0.0213881	Inf
CG8564	TRUE	FALSE	NA	NA	NA	NA	NA	NA	NA	NA	NA	NA	TRUE	FALSE	NA	NA	NA	NA	NA	NA	NA	NA	NA	NA	NA	0	3.24579	0	1.97224	0	2.60901	Inf	0	0.12457	0	0.0756018	0	0.100086	Inf
CG8565	TRUE	FALSE	NA	NA	NA	NA	NA	NA	NA	NA	NA	NA	TRUE	FALSE	NA	NA	NA	NA	NA	NA	NA	NA	NA	NA	NA	0	1.0152	0	0.925301	0	0.970253	Inf	0	0.024656	0	0.0224457	0	0.0235508	Inf
CG8641	TRUE	FALSE	NA	NA	NA	NA	NA	NA	NA	NA	NA	NA	TRUE	FALSE	NA	NA	NA	NA	NA	NA	NA	NA	NA	NA	NA	0	1.25236	0	0	0	0.626181	Inf	0	0.0288814	0	0	0	0.0144407	Inf
CG8701	TRUE	FALSE	NA	NA	NA	NA	NA	NA	NA	NA	NA	NA	TRUE	FALSE	NA	NA	NA	NA	NA	NA	NA	NA	NA	NA	NA	0	1.0152	0	0	0	0.507602	Inf	0	0.0692692	0	0	0	0.0346346	Inf
CG8757	TRUE	FALSE	NA	NA	NA	NA	NA	NA	NA	NA	NA	NA	TRUE	FALSE	NA	NA	NA	NA	NA	NA	NA	NA	NA	NA	NA	0	1.0152	0	0	0	0.507602	Inf	0	0.0359341	0	0	0	0.017967	Inf
CG8774	TRUE	FALSE	NA	NA	NA	NA	NA	NA	NA	NA	NA	NA	TRUE	FALSE	NA	NA	NA	NA	NA	NA	NA	NA	NA	NA	NA	0	0	0	0.945867	0	0.472933	Inf	0	0	0	0.0198499	0	0.00992494	Inf
CG8834	TRUE	FALSE	NA	NA	NA	NA	NA	NA	NA	NA	NA	NA	TRUE	FALSE	NA	NA	NA	NA	NA	NA	NA	NA	NA	NA	NA	0	0	0	76.7793	0	38.3896	Inf	0	0	0	2.92618	0	1.46309	Inf
CG8850	TRUE	FALSE	NA	NA	NA	NA	NA	NA	NA	NA	NA	NA	TRUE	FALSE	NA	NA	NA	NA	NA	NA	NA	NA	NA	NA	NA	0	0.97235	0	0	0	0.486175	Inf	0	0.0292738	0	0	0	0.0146369	Inf
CG8851	TRUE	FALSE	NA	NA	NA	NA	NA	NA	NA	NA	NA	NA	TRUE	FALSE	NA	NA	NA	NA	NA	NA	NA	NA	NA	NA	NA	0	2.08665	0	0	0	1.04332	Inf	0	0.0581245	0	0	0	0.0290623	Inf
CG8910	TRUE	FALSE	NA	NA	NA	NA	NA	NA	NA	NA	NA	NA	TRUE	FALSE	NA	NA	NA	NA	NA	NA	NA	NA	NA	NA	NA	0	0	0	0.925301	0	0.46265	Inf	0	0	0	0.0171265	0	0.00856324	Inf
CG8916	TRUE	FALSE	NA	NA	NA	NA	NA	NA	NA	NA	NA	NA	TRUE	FALSE	NA	NA	NA	NA	NA	NA	NA	NA	NA	NA	NA	0	0	0	0.969894	0	0.484947	Inf	0	0	0	0.0330872	0	0.0165436	Inf
CG8927	TRUE	FALSE	NA	NA	NA	NA	NA	NA	NA	NA	NA	NA	TRUE	FALSE	NA	NA	NA	NA	NA	NA	NA	NA	NA	NA	NA	0	0	0	0.949345	0	0.474672	Inf	0	0	0	0.0460392	0	0.0230196	Inf
CG8952	TRUE	FALSE	NA	NA	NA	NA	NA	NA	NA	NA	NA	NA	TRUE	FALSE	NA	NA	NA	NA	NA	NA	NA	NA	NA	NA	NA	0	2.03041	0	25.9084	0	13.9694	Inf	0	0.171646	0	2.18762	0	1.17964	Inf
CG9084	TRUE	FALSE	NA	NA	NA	NA	NA	NA	NA	NA	NA	NA	TRUE	FALSE	NA	NA	NA	NA	NA	NA	NA	NA	NA	NA	NA	0	1.02962	0	3.75375	0	2.39169	Inf	0	0.0817507	0	0.297687	0	0.189719	Inf
CG9109	TRUE	FALSE	NA	NA	NA	NA	NA	NA	NA	NA	NA	NA	TRUE	FALSE	NA	NA	NA	NA	NA	NA	NA	NA	NA	NA	NA	0	6.13663	0	3.72879	0	4.93271	Inf	0	0.224845	0	0.136459	0	0.180652	Inf
CG9134	TRUE	FALSE	NA	NA	NA	NA	NA	NA	NA	NA	NA	NA	TRUE	FALSE	NA	NA	NA	NA	NA	NA	NA	NA	NA	NA	NA	0	0.552366	0	0	0	0.276183	Inf	0	0.0311157	0	0	0	0.0155578	Inf
CG9173	TRUE	FALSE	NA	NA	NA	NA	NA	NA	NA	NA	NA	NA	TRUE	FALSE	NA	NA	NA	NA	NA	NA	NA	NA	NA	NA	NA	0	3.04561	0	1.8506	0	2.44811	Inf	0	0.0872709	0	0.052965	0	0.0701179	Inf
CG9287	TRUE	FALSE	NA	NA	NA	NA	NA	NA	NA	NA	NA	NA	TRUE	FALSE	NA	NA	NA	NA	NA	NA	NA	NA	NA	NA	NA	0	0	0	1.8506	0	0.925301	Inf	0	0	0	0.0617131	0	0.0308566	Inf
CG9313	TRUE	FALSE	NA	NA	NA	NA	NA	NA	NA	NA	NA	NA	TRUE	FALSE	NA	NA	NA	NA	NA	NA	NA	NA	NA	NA	NA	0	0	0	4.19486	0	2.09743	Inf	0	0	0	0.101509	0	0.0507545	Inf
CG9316	TRUE	FALSE	NA	NA	NA	NA	NA	NA	NA	NA	NA	NA	TRUE	FALSE	NA	NA	NA	NA	NA	NA	NA	NA	NA	NA	NA	0	0	0	0.925301	0	0.46265	Inf	0	0	0	0.0278664	0	0.0139332	Inf
CG9389	TRUE	FALSE	NA	NA	NA	NA	NA	NA	NA	NA	NA	NA	TRUE	FALSE	NA	NA	NA	NA	NA	NA	NA	NA	NA	NA	NA	0	0	0	0.925301	0	0.46265	Inf	0	0	0	0.0297856	0	0.0148928	Inf
CG9395	TRUE	FALSE	NA	NA	NA	NA	NA	NA	NA	NA	NA	NA	TRUE	FALSE	NA	NA	NA	NA	NA	NA	NA	NA	NA	NA	NA	0	1.05541	0	0	0	0.527706	Inf	0	0.0163107	0	0	0	0.00815534	Inf
CG9447	TRUE	FALSE	NA	NA	NA	NA	NA	NA	NA	NA	NA	NA	TRUE	FALSE	NA	NA	NA	NA	NA	NA	NA	NA	NA	NA	NA	0	0	0	0.925301	0	0.46265	Inf	0	0	0	0.0274761	0	0.013738	Inf
CG9452	TRUE	FALSE	NA	NA	NA	NA	NA	NA	NA	NA	NA	NA	TRUE	FALSE	NA	NA	NA	NA	NA	NA	NA	NA	NA	NA	NA	0	0	0	3.7012	0	1.8506	Inf	0	0	0	0.151204	0	0.0756018	Inf
CG9463	TRUE	FALSE	NA	NA	NA	NA	NA	NA	NA	NA	NA	NA	TRUE	FALSE	NA	NA	NA	NA	NA	NA	NA	NA	NA	NA	NA	0	0	0	43.2072	0	21.6036	Inf	0	0	0	0.867926	0	0.433963	Inf
CG9466	TRUE	FALSE	NA	NA	NA	NA	NA	NA	NA	NA	NA	NA	TRUE	FALSE	NA	NA	NA	NA	NA	NA	NA	NA	NA	NA	NA	0	0	0	23.3578	0	11.6789	Inf	0	0	0	0.483182	0	0.241591	Inf
CG9468	TRUE	FALSE	NA	NA	NA	NA	NA	NA	NA	NA	NA	NA	TRUE	FALSE	NA	NA	NA	NA	NA	NA	NA	NA	NA	NA	NA	0	1.0152	0	98.8258	0	49.9205	Inf	0	0.020376	0	1.98114	0	1.00076	Inf
CG9568	TRUE	FALSE	NA	NA	NA	NA	NA	NA	NA	NA	NA	NA	TRUE	FALSE	NA	NA	NA	NA	NA	NA	NA	NA	NA	NA	NA	0	0	0	1.8506	0	0.925301	Inf	0	0	0	0.246855	0	0.123428	Inf
CG9616	TRUE	FALSE	NA	NA	NA	NA	NA	NA	NA	NA	NA	NA	TRUE	FALSE	NA	NA	NA	NA	NA	NA	NA	NA	NA	NA	NA	0	0	0	0.925301	0	0.46265	Inf	0	0	0	0.156483	0	0.0782414	Inf
CG9624	TRUE	FALSE	NA	NA	NA	NA	NA	NA	NA	NA	NA	NA	TRUE	FALSE	NA	NA	NA	NA	NA	NA	NA	NA	NA	NA	NA	0	1.0152	0	0.925301	0	0.970253	Inf	0	0.0709806	0	0.0646175	0	0.0677991	Inf
CG9642	TRUE	FALSE	NA	NA	NA	NA	NA	NA	NA	NA	NA	NA	TRUE	FALSE	NA	NA	NA	NA	NA	NA	NA	NA	NA	NA	NA	0	1.0152	0	0	0	0.507602	Inf	0	0.0379216	0	0	0	0.0189608	Inf
CG9672	TRUE	FALSE	NA	NA	NA	NA	NA	NA	NA	NA	NA	NA	TRUE	FALSE	NA	NA	NA	NA	NA	NA	NA	NA	NA	NA	NA	0	0	0	13.8795	0	6.93976	Inf	0	0	0	1.34182	0	0.670909	Inf
CG9673	TRUE	FALSE	NA	NA	NA	NA	NA	NA	NA	NA	NA	NA	TRUE	FALSE	NA	NA	NA	NA	NA	NA	NA	NA	NA	NA	NA	0	0	0	7.86774	0	3.93387	Inf	0	0	0	0.634971	0	0.317486	Inf
CG9692	TRUE	FALSE	NA	NA	NA	NA	NA	NA	NA	NA	NA	NA	TRUE	FALSE	NA	NA	NA	NA	NA	NA	NA	NA	NA	NA	NA	0	2.03372	0	0.926803	0	1.48026	Inf	0	0.101395	0	0.0461526	0	0.073774	Inf
CG9702	TRUE	FALSE	NA	NA	NA	NA	NA	NA	NA	NA	NA	NA	TRUE	FALSE	NA	NA	NA	NA	NA	NA	NA	NA	NA	NA	NA	0	7.1513	0	5.84437	0	6.49783	Inf	0	0.22228	0	0.181441	0	0.20186	Inf
CG9782	TRUE	FALSE	NA	NA	NA	NA	NA	NA	NA	NA	NA	NA	TRUE	FALSE	NA	NA	NA	NA	NA	NA	NA	NA	NA	NA	NA	0	1.0152	0	0.925301	0	0.970253	Inf	0	0.0499862	0	0.0455052	0	0.0477457	Inf
CG9825	TRUE	FALSE	NA	NA	NA	NA	NA	NA	NA	NA	NA	NA	TRUE	FALSE	NA	NA	NA	NA	NA	NA	NA	NA	NA	NA	NA	0	1.0152	0	3.7012	0	2.3582	Inf	0	0.0448909	0	0.163467	0	0.104179	Inf
CG9899	TRUE	FALSE	NA	NA	NA	NA	NA	NA	NA	NA	NA	NA	TRUE	FALSE	NA	NA	NA	NA	NA	NA	NA	NA	NA	NA	NA	0	2.03041	0	1.8506	0	1.94051	Inf	0	0.0432651	0	0.0393866	0	0.0413259	Inf
CG9975	TRUE	FALSE	NA	NA	NA	NA	NA	NA	NA	NA	NA	NA	TRUE	FALSE	NA	NA	NA	NA	NA	NA	NA	NA	NA	NA	NA	0	1.37574	0	1.46632	0	1.42103	Inf	0	0.0338761	0	0.0360634	0	0.0349697	Inf
CG9981	TRUE	FALSE	NA	NA	NA	NA	NA	NA	NA	NA	NA	NA	TRUE	FALSE	NA	NA	NA	NA	NA	NA	NA	NA	NA	NA	NA	0	1.14276	0	2.77442	0	1.95859	Inf	0	0.0181781	0	0.0440807	0	0.0311294	Inf
Cha	TRUE	FALSE	NA	NA	NA	NA	NA	NA	NA	NA	NA	NA	TRUE	FALSE	NA	NA	NA	NA	NA	NA	NA	NA	NA	NA	NA	0	1.71429	0	2.34371	0	2.029	Inf	0	0.0316543	0	0.043225	0	0.0374397	Inf
CheA29a	TRUE	FALSE	NA	NA	NA	NA	NA	NA	NA	NA	NA	NA	TRUE	FALSE	NA	NA	NA	NA	NA	NA	NA	NA	NA	NA	NA	0	1.0152	0	0	0	0.507602	Inf	0	0.123889	0	0	0	0.0619444	Inf
CheA87a	TRUE	FALSE	NA	NA	NA	NA	NA	NA	NA	NA	NA	NA	TRUE	FALSE	NA	NA	NA	NA	NA	NA	NA	NA	NA	NA	NA	0	1.0152	0	0	0	0.507602	Inf	0	0.135887	0	0	0	0.0679436	Inf
Cht4	TRUE	FALSE	NA	NA	NA	NA	NA	NA	NA	NA	NA	NA	TRUE	FALSE	NA	NA	NA	NA	NA	NA	NA	NA	NA	NA	NA	0	0	0	1.8506	0	0.925301	Inf	0	0	0	0.0862241	0	0.0431121	Inf
Cht5	TRUE	FALSE	NA	NA	NA	NA	NA	NA	NA	NA	NA	NA	TRUE	FALSE	NA	NA	NA	NA	NA	NA	NA	NA	NA	NA	NA	0	0	0	0.925301	0	0.46265	Inf	0	0	0	0.028562	0	0.014281	Inf
Cht9	TRUE	FALSE	NA	NA	NA	NA	NA	NA	NA	NA	NA	NA	TRUE	FALSE	NA	NA	NA	NA	NA	NA	NA	NA	NA	NA	NA	0	0	0	6.47711	0	3.23855	Inf	0	0	0	0.399661	0	0.199831	Inf
comr	TRUE	FALSE	NA	NA	NA	NA	NA	NA	NA	NA	NA	NA	TRUE	FALSE	NA	NA	NA	NA	NA	NA	NA	NA	NA	NA	NA	0	1.0152	0	0.925301	0	0.970253	Inf	0	0.0336869	0	0.030667	0	0.032177	Inf
Cpn	TRUE	FALSE	NA	NA	NA	NA	NA	NA	NA	NA	NA	NA	TRUE	FALSE	NA	NA	NA	NA	NA	NA	NA	NA	NA	NA	NA	0	0	0	0.9371	0	0.46855	Inf	0	0	0	0.0212228	0	0.0106114	Inf
Cpr23B	TRUE	FALSE	NA	NA	NA	NA	NA	NA	NA	NA	NA	NA	TRUE	FALSE	NA	NA	NA	NA	NA	NA	NA	NA	NA	NA	NA	0	0	0	0.925301	0	0.46265	Inf	0	0	0	0.0633505	0	0.0316753	Inf
Cpr30F	TRUE	FALSE	NA	NA	NA	NA	NA	NA	NA	NA	NA	NA	TRUE	FALSE	NA	NA	NA	NA	NA	NA	NA	NA	NA	NA	NA	0	0	0	0.925301	0	0.46265	Inf	0	0	0	0.0874603	0	0.0437301	Inf
Cpr47Ee	TRUE	FALSE	NA	NA	NA	NA	NA	NA	NA	NA	NA	NA	TRUE	FALSE	NA	NA	NA	NA	NA	NA	NA	NA	NA	NA	NA	0	2.0361	0	3.7012	0	2.86865	Inf	0	0.101942	0	0.185088	0	0.143515	Inf
Cpr56F	TRUE	FALSE	NA	NA	NA	NA	NA	NA	NA	NA	NA	NA	TRUE	FALSE	NA	NA	NA	NA	NA	NA	NA	NA	NA	NA	NA	0	0	0	0.925301	0	0.46265	Inf	0	0	0	0.0518159	0	0.0259079	Inf
Cpr62Bb	TRUE	FALSE	NA	NA	NA	NA	NA	NA	NA	NA	NA	NA	TRUE	FALSE	NA	NA	NA	NA	NA	NA	NA	NA	NA	NA	NA	0	1.04689	0	0	0	0.523443	Inf	0	0.0855796	0	0	0	0.0427898	Inf
Cpr65Au	TRUE	FALSE	NA	NA	NA	NA	NA	NA	NA	NA	NA	NA	TRUE	FALSE	NA	NA	NA	NA	NA	NA	NA	NA	NA	NA	NA	0	1.16109	0	0	0	0.580547	Inf	0	0.237538	0	0	0	0.118769	Inf
Cpr66Cb	TRUE	FALSE	NA	NA	NA	NA	NA	NA	NA	NA	NA	NA	TRUE	FALSE	NA	NA	NA	NA	NA	NA	NA	NA	NA	NA	NA	0	1.0152	0	0.925301	0	0.970253	Inf	0	0.0752289	0	0.0684849	0	0.0718569	Inf
Cpr67Fb	TRUE	FALSE	NA	NA	NA	NA	NA	NA	NA	NA	NA	NA	TRUE	FALSE	NA	NA	NA	NA	NA	NA	NA	NA	NA	NA	NA	0	0	0	0.925301	0	0.46265	Inf	0	0	0	0.212891	0	0.106445	Inf
Cpr76Bb	TRUE	FALSE	NA	NA	NA	NA	NA	NA	NA	NA	NA	NA	TRUE	FALSE	NA	NA	NA	NA	NA	NA	NA	NA	NA	NA	NA	0	1.0152	0	0.925301	0	0.970253	Inf	0	0.105479	0	0.0960229	0	0.100751	Inf
CR30121	FALSE	FALSE	NA	NA	NA	NA	NA	NA	NA	NA	NA	NA	FALSE	FALSE	NA	NA	NA	NA	NA	NA	NA	NA	NA	NA	NA	0	2.03041	0	1.8506	0	1.94051	Inf	0	0.0574602	0	0.0523092	0	0.0548847	Inf
CR32111	FALSE	FALSE	NA	NA	NA	NA	NA	NA	NA	NA	NA	NA	FALSE	FALSE	NA	NA	NA	NA	NA	NA	NA	NA	NA	NA	NA	0	2.05793	0	0	0	1.02896	Inf	0	0.0367438	0	0	0	0.0183719	Inf
CR32160	FALSE	FALSE	NA	NA	NA	NA	NA	NA	NA	NA	NA	NA	FALSE	FALSE	NA	NA	NA	NA	NA	NA	NA	NA	NA	NA	NA	0	1.0152	0	0	0	0.507602	Inf	0	0.0311157	0	0	0	0.0155578	Inf
CR32657	FALSE	FALSE	NA	NA	NA	NA	NA	NA	NA	NA	NA	NA	FALSE	FALSE	NA	NA	NA	NA	NA	NA	NA	NA	NA	NA	NA	0	2.03041	0	0	0	1.0152	Inf	0	0.782668	0	0	0	0.391334	Inf
CR32660	FALSE	FALSE	NA	NA	NA	NA	NA	NA	NA	NA	NA	NA	FALSE	FALSE	NA	NA	NA	NA	NA	NA	NA	NA	NA	NA	NA	0	0	0	1.12011	0	0.560056	Inf	0	0	0	0.344202	0	0.172101	Inf
CR32730	FALSE	FALSE	NA	NA	NA	NA	NA	NA	NA	NA	NA	NA	FALSE	FALSE	NA	NA	NA	NA	NA	NA	NA	NA	NA	NA	NA	0	1.0152	0	4.6265	0	2.82085	Inf	0	0.0360629	0	0.16415	0	0.100107	Inf
CR32835	FALSE	FALSE	NA	NA	NA	NA	NA	NA	NA	NA	NA	NA	FALSE	FALSE	NA	NA	NA	NA	NA	NA	NA	NA	NA	NA	NA	0	0	0	1.25488	0	0.627442	Inf	0	0	0	0.091848	0	0.045924	Inf
CR40502	FALSE	FALSE	NA	NA	NA	NA	NA	NA	NA	NA	NA	NA	FALSE	FALSE	NA	NA	NA	NA	NA	NA	NA	NA	NA	NA	NA	0	0	0	1.06357	0	0.531787	Inf	0	0	0	0.256642	0	0.128321	Inf
CR41352	FALSE	FALSE	NA	NA	NA	NA	NA	NA	NA	NA	NA	NA	FALSE	FALSE	NA	NA	NA	NA	NA	NA	NA	NA	NA	NA	NA	0	0	0	0.925301	0	0.46265	Inf	0	0	0	0.278801	0	0.139401	Inf
CR41443	FALSE	FALSE	NA	NA	NA	NA	NA	NA	NA	NA	NA	NA	FALSE	FALSE	NA	NA	NA	NA	NA	NA	NA	NA	NA	NA	NA	0	1.02266	0	0	0	0.511331	Inf	0	0.0554025	0	0	0	0.0277013	Inf
CR41550	FALSE	FALSE	NA	NA	NA	NA	NA	NA	NA	NA	NA	NA	FALSE	FALSE	NA	NA	NA	NA	NA	NA	NA	NA	NA	NA	NA	0	1.34573	0	1.16255	0	1.25414	Inf	0	0.0962415	0	0.0830418	0	0.0896417	Inf
CR41591	FALSE	FALSE	NA	NA	NA	NA	NA	NA	NA	NA	NA	NA	FALSE	FALSE	NA	NA	NA	NA	NA	NA	NA	NA	NA	NA	NA	0	1.0152	0	0	0	0.507602	Inf	0	0.0346146	0	0	0	0.0173073	Inf
CR41601	FALSE	FALSE	NA	NA	NA	NA	NA	NA	NA	NA	NA	NA	FALSE	FALSE	NA	NA	NA	NA	NA	NA	NA	NA	NA	NA	NA	0	1.0152	0	0	0	0.507602	Inf	0	0.145383	0	0	0	0.0726916	Inf
CR42742	FALSE	FALSE	NA	NA	NA	NA	NA	NA	NA	NA	NA	NA	FALSE	FALSE	NA	NA	NA	NA	NA	NA	NA	NA	NA	NA	NA	0	0	0	0.925301	0	0.46265	Inf	0	0	0	0.0600272	0	0.0300136	Inf
CR42746	FALSE	FALSE	NA	NA	NA	NA	NA	NA	NA	NA	NA	NA	FALSE	FALSE	NA	NA	NA	NA	NA	NA	NA	NA	NA	NA	NA	0	0	0	1.8506	0	0.925301	Inf	0	0	0	0.174921	0	0.0874603	Inf
CR42765	FALSE	FALSE	NA	NA	NA	NA	NA	NA	NA	NA	NA	NA	FALSE	FALSE	NA	NA	NA	NA	NA	NA	NA	NA	NA	NA	NA	0	1.0152	0	0	0	0.507602	Inf	0	0.1551	0	0	0	0.0775502	Inf
CR42860	FALSE	FALSE	NA	NA	NA	NA	NA	NA	NA	NA	NA	NA	FALSE	FALSE	NA	NA	NA	NA	NA	NA	NA	NA	NA	NA	NA	0	2.29499	0	0	0	1.1475	Inf	0	0.121887	0	0	0	0.0609433	Inf
CR42868	FALSE	FALSE	NA	NA	NA	NA	NA	NA	NA	NA	NA	NA	FALSE	FALSE	NA	NA	NA	NA	NA	NA	NA	NA	NA	NA	NA	0	1.0152	0	0	0	0.507602	Inf	0	0.435777	0	0	0	0.217888	Inf
CR43260	FALSE	FALSE	NA	NA	NA	NA	NA	NA	NA	NA	NA	NA	FALSE	FALSE	NA	NA	NA	NA	NA	NA	NA	NA	NA	NA	NA	0	1.0152	0	0	0	0.507602	Inf	0	0.195891	0	0	0	0.0979453	Inf
CR43279	FALSE	FALSE	NA	NA	NA	NA	NA	NA	NA	NA	NA	NA	FALSE	FALSE	NA	NA	NA	NA	NA	NA	NA	NA	NA	NA	NA	0	0	0	2.05157e-05	0	1.02579e-05	Inf	0	0	0	2.14779e-06	0	1.0739e-06	Inf
CR43282	FALSE	FALSE	NA	NA	NA	NA	NA	NA	NA	NA	NA	NA	FALSE	FALSE	NA	NA	NA	NA	NA	NA	NA	NA	NA	NA	NA	0	0	0	0.947446	0	0.473723	Inf	0	0	0	0.0710543	0	0.0355271	Inf
CR43289	FALSE	FALSE	NA	NA	NA	NA	NA	NA	NA	NA	NA	NA	FALSE	FALSE	NA	NA	NA	NA	NA	NA	NA	NA	NA	NA	NA	0	0	0	0.925301	0	0.46265	Inf	0	0	0	0.520694	0	0.260347	Inf
CR43297	FALSE	FALSE	NA	NA	NA	NA	NA	NA	NA	NA	NA	NA	FALSE	FALSE	NA	NA	NA	NA	NA	NA	NA	NA	NA	NA	NA	0	0	0	0.925301	0	0.46265	Inf	0	0	0	0.0850233	0	0.0425116	Inf
CR43304	FALSE	FALSE	NA	NA	NA	NA	NA	NA	NA	NA	NA	NA	FALSE	FALSE	NA	NA	NA	NA	NA	NA	NA	NA	NA	NA	NA	0	0	0	0.925301	0	0.46265	Inf	0	0	0	0.203429	0	0.101714	Inf
CR43363	FALSE	FALSE	NA	NA	NA	NA	NA	NA	NA	NA	NA	NA	FALSE	FALSE	NA	NA	NA	NA	NA	NA	NA	NA	NA	NA	NA	0	1.0152	0	0	0	0.507602	Inf	0	0.193379	0	0	0	0.0966896	Inf
CR43418	FALSE	FALSE	NA	NA	NA	NA	NA	NA	NA	NA	NA	NA	FALSE	FALSE	NA	NA	NA	NA	NA	NA	NA	NA	NA	NA	NA	0	1.0152	0	2.7759	0	1.89555	Inf	0	0.119473	0	0.326288	0	0.222881	Inf
CR43419	FALSE	FALSE	NA	NA	NA	NA	NA	NA	NA	NA	NA	NA	FALSE	FALSE	NA	NA	NA	NA	NA	NA	NA	NA	NA	NA	NA	0	0	0	1.8506	0	0.925301	Inf	0	0	0	0.101337	0	0.0506686	Inf
CR43467	FALSE	FALSE	NA	NA	NA	NA	NA	NA	NA	NA	NA	NA	FALSE	FALSE	NA	NA	NA	NA	NA	NA	NA	NA	NA	NA	NA	0	0	0	0.673975	0	0.336988	Inf	0	0	0	0.0210117	0	0.0105059	Inf
CR43470	FALSE	FALSE	NA	NA	NA	NA	NA	NA	NA	NA	NA	NA	FALSE	FALSE	NA	NA	NA	NA	NA	NA	NA	NA	NA	NA	NA	0	5.16862	0	4.54508	0	4.85685	Inf	0	0.196525	0	0.172611	0	0.184568	Inf
CR43475	FALSE	FALSE	NA	NA	NA	NA	NA	NA	NA	NA	NA	NA	FALSE	FALSE	NA	NA	NA	NA	NA	NA	NA	NA	NA	NA	NA	0	0	0	0.925301	0	0.46265	Inf	0	0	0	0.180676	0	0.0903382	Inf
CR43478	FALSE	FALSE	NA	NA	NA	NA	NA	NA	NA	NA	NA	NA	FALSE	FALSE	NA	NA	NA	NA	NA	NA	NA	NA	NA	NA	NA	0	1.0152	0	0	0	0.507602	Inf	0	0.0508285	0	0	0	0.0254142	Inf
CR43636	FALSE	FALSE	NA	NA	NA	NA	NA	NA	NA	NA	NA	NA	FALSE	FALSE	NA	NA	NA	NA	NA	NA	NA	NA	NA	NA	NA	0	4.06082	0	0.925301	0	2.49306	Inf	0	0.401555	0	0.0913895	0	0.246472	Inf
CR43643	FALSE	FALSE	NA	NA	NA	NA	NA	NA	NA	NA	NA	NA	FALSE	FALSE	NA	NA	NA	NA	NA	NA	NA	NA	NA	NA	NA	0	0	0	1.8506	0	0.925301	Inf	0	0	0	0.101337	0	0.0506686	Inf
CR43682	FALSE	FALSE	NA	NA	NA	NA	NA	NA	NA	NA	NA	NA	FALSE	FALSE	NA	NA	NA	NA	NA	NA	NA	NA	NA	NA	NA	0	1.0152	0	0	0	0.507602	Inf	0	0.132311	0	0	0	0.0661556	Inf
CR43700	FALSE	FALSE	NA	NA	NA	NA	NA	NA	NA	NA	NA	NA	FALSE	FALSE	NA	NA	NA	NA	NA	NA	NA	NA	NA	NA	NA	0	1.0152	0	0	0	0.507602	Inf	0	0.11761	0	0	0	0.0588049	Inf
CR43762	FALSE	FALSE	NA	NA	NA	NA	NA	NA	NA	NA	NA	NA	FALSE	FALSE	NA	NA	NA	NA	NA	NA	NA	NA	NA	NA	NA	0	3.04561	0	3.7012	0	3.37341	Inf	0	0.213444	0	0.25908	0	0.236262	Inf
CR43765	FALSE	FALSE	NA	NA	NA	NA	NA	NA	NA	NA	NA	NA	FALSE	FALSE	NA	NA	NA	NA	NA	NA	NA	NA	NA	NA	NA	0	2.03041	0	0	0	1.0152	Inf	0	0.621975	0	0	0	0.310988	Inf
CR43769	FALSE	FALSE	NA	NA	NA	NA	NA	NA	NA	NA	NA	NA	FALSE	FALSE	NA	NA	NA	NA	NA	NA	NA	NA	NA	NA	NA	0	1.0152	0	0	0	0.507602	Inf	0	0.229409	0	0	0	0.114704	Inf
CR43802	FALSE	FALSE	NA	NA	NA	NA	NA	NA	NA	NA	NA	NA	FALSE	FALSE	NA	NA	NA	NA	NA	NA	NA	NA	NA	NA	NA	0	0	0	1.05436	0	0.527179	Inf	0	0	0	0.144541	0	0.0722703	Inf
CR43803	FALSE	FALSE	NA	NA	NA	NA	NA	NA	NA	NA	NA	NA	FALSE	FALSE	NA	NA	NA	NA	NA	NA	NA	NA	NA	NA	NA	0	1.0152	0	0	0	0.507602	Inf	0	0.0971557	0	0	0	0.0485779	Inf
CR43807	FALSE	FALSE	NA	NA	NA	NA	NA	NA	NA	NA	NA	NA	FALSE	FALSE	NA	NA	NA	NA	NA	NA	NA	NA	NA	NA	NA	0	1.0152	0	0	0	0.507602	Inf	0	0.0892509	0	0	0	0.0446255	Inf
CR43819	FALSE	FALSE	NA	NA	NA	NA	NA	NA	NA	NA	NA	NA	FALSE	FALSE	NA	NA	NA	NA	NA	NA	NA	NA	NA	NA	NA	0	1.48161	0	0	0	0.740805	Inf	0	0.222637	0	0	0	0.111318	Inf
CR43825	FALSE	FALSE	NA	NA	NA	NA	NA	NA	NA	NA	NA	NA	FALSE	FALSE	NA	NA	NA	NA	NA	NA	NA	NA	NA	NA	NA	0	0	0	0.925301	0	0.46265	Inf	0	0	0	0.177179	0	0.0885897	Inf
CR43835	FALSE	FALSE	NA	NA	NA	NA	NA	NA	NA	NA	NA	NA	FALSE	FALSE	NA	NA	NA	NA	NA	NA	NA	NA	NA	NA	NA	0	0	0	0.92528	0	0.46264	Inf	0	0	0	0.0980784	0	0.0490392	Inf
CR43853	FALSE	FALSE	NA	NA	NA	NA	NA	NA	NA	NA	NA	NA	FALSE	FALSE	NA	NA	NA	NA	NA	NA	NA	NA	NA	NA	NA	0	0	0	0.925301	0	0.46265	Inf	0	0	0	0.0697017	0	0.0348508	Inf
CR43864	FALSE	FALSE	NA	NA	NA	NA	NA	NA	NA	NA	NA	NA	FALSE	FALSE	NA	NA	NA	NA	NA	NA	NA	NA	NA	NA	NA	0	0	0	1.85956	0	0.92978	Inf	0	0	0	0.0759678	0	0.0379839	Inf
CR43870	FALSE	FALSE	NA	NA	NA	NA	NA	NA	NA	NA	NA	NA	FALSE	FALSE	NA	NA	NA	NA	NA	NA	NA	NA	NA	NA	NA	0	1.0152	0	0	0	0.507602	Inf	0	0.148973	0	0	0	0.0744865	Inf
CR43890	FALSE	FALSE	NA	NA	NA	NA	NA	NA	NA	NA	NA	NA	FALSE	FALSE	NA	NA	NA	NA	NA	NA	NA	NA	NA	NA	NA	0	1.0152	0	0.925301	0	0.970253	Inf	0	0.602269	0	0.548278	0	0.575274	Inf
CR43905	FALSE	FALSE	NA	NA	NA	NA	NA	NA	NA	NA	NA	NA	FALSE	FALSE	NA	NA	NA	NA	NA	NA	NA	NA	NA	NA	NA	0	2.03041	0	0	0	1.0152	Inf	0	0.150458	0	0	0	0.0752289	Inf
CR43916	FALSE	FALSE	NA	NA	NA	NA	NA	NA	NA	NA	NA	NA	FALSE	FALSE	NA	NA	NA	NA	NA	NA	NA	NA	NA	NA	NA	0	0	0	0.925301	0	0.46265	Inf	0	0	0	0.300102	0	0.150051	Inf
CR43918	FALSE	FALSE	NA	NA	NA	NA	NA	NA	NA	NA	NA	NA	FALSE	FALSE	NA	NA	NA	NA	NA	NA	NA	NA	NA	NA	NA	0	1.0152	0	0	0	0.507602	Inf	0	0.64649	0	0	0	0.323245	Inf
CR43928	FALSE	FALSE	NA	NA	NA	NA	NA	NA	NA	NA	NA	NA	FALSE	FALSE	NA	NA	NA	NA	NA	NA	NA	NA	NA	NA	NA	0	0	0	0.699746	0	0.349873	Inf	0	0	0	0.052711	0	0.0263555	Inf
CR43953	FALSE	FALSE	NA	NA	NA	NA	NA	NA	NA	NA	NA	NA	FALSE	FALSE	NA	NA	NA	NA	NA	NA	NA	NA	NA	NA	NA	0	1.0152	0	0	0	0.507602	Inf	0	0.128644	0	0	0	0.0643218	Inf
CR43978	FALSE	FALSE	NA	NA	NA	NA	NA	NA	NA	NA	NA	NA	FALSE	FALSE	NA	NA	NA	NA	NA	NA	NA	NA	NA	NA	NA	0	1.0152	0	0.925301	0	0.970253	Inf	0	0.0801243	0	0.0729415	0	0.0765329	Inf
CR43981	FALSE	FALSE	NA	NA	NA	NA	NA	NA	NA	NA	NA	NA	FALSE	FALSE	NA	NA	NA	NA	NA	NA	NA	NA	NA	NA	NA	0	2.03041	0	0	0	1.0152	Inf	0	0.35078	0	0	0	0.17539	Inf
CR44050	FALSE	FALSE	NA	NA	NA	NA	NA	NA	NA	NA	NA	NA	FALSE	FALSE	NA	NA	NA	NA	NA	NA	NA	NA	NA	NA	NA	0	1.0152	0	0	0	0.507602	Inf	0	0.0631103	0	0	0	0.0315552	Inf
CR44058	FALSE	FALSE	NA	NA	NA	NA	NA	NA	NA	NA	NA	NA	FALSE	FALSE	NA	NA	NA	NA	NA	NA	NA	NA	NA	NA	NA	0	0	0	1.44146	0	0.720728	Inf	0	0	0	0.117613	0	0.0588065	Inf
CR44066	FALSE	FALSE	NA	NA	NA	NA	NA	NA	NA	NA	NA	NA	FALSE	FALSE	NA	NA	NA	NA	NA	NA	NA	NA	NA	NA	NA	0	0	0	0.925301	0	0.46265	Inf	0	0	0	0.0689146	0	0.0344573	Inf
CR44082	FALSE	FALSE	NA	NA	NA	NA	NA	NA	NA	NA	NA	NA	FALSE	FALSE	NA	NA	NA	NA	NA	NA	NA	NA	NA	NA	NA	0	1.0152	0	0	0	0.507602	Inf	0	0.297209	0	0	0	0.148604	Inf
CR44100	FALSE	FALSE	NA	NA	NA	NA	NA	NA	NA	NA	NA	NA	FALSE	FALSE	NA	NA	NA	NA	NA	NA	NA	NA	NA	NA	NA	0	0	0	0.925301	0	0.46265	Inf	0	0	0	0.411137	0	0.205569	Inf
CR44107	FALSE	FALSE	NA	NA	NA	NA	NA	NA	NA	NA	NA	NA	FALSE	FALSE	NA	NA	NA	NA	NA	NA	NA	NA	NA	NA	NA	0	1.0152	0	0	0	0.507602	Inf	0	0.333289	0	0	0	0.166645	Inf
CR44109	FALSE	FALSE	NA	NA	NA	NA	NA	NA	NA	NA	NA	NA	FALSE	FALSE	NA	NA	NA	NA	NA	NA	NA	NA	NA	NA	NA	0	0	0	0.925301	0	0.46265	Inf	0	0	0	0.0583686	0	0.0291843	Inf
CR44110	FALSE	FALSE	NA	NA	NA	NA	NA	NA	NA	NA	NA	NA	FALSE	FALSE	NA	NA	NA	NA	NA	NA	NA	NA	NA	NA	NA	0	1.0152	0	0	0	0.507602	Inf	0	0.142634	0	0	0	0.0713168	Inf
CR44113	FALSE	FALSE	NA	NA	NA	NA	NA	NA	NA	NA	NA	NA	FALSE	FALSE	NA	NA	NA	NA	NA	NA	NA	NA	NA	NA	NA	0	1.0152	0	0	0	0.507602	Inf	0	0.426746	0	0	0	0.213373	Inf
CR44149	FALSE	FALSE	NA	NA	NA	NA	NA	NA	NA	NA	NA	NA	FALSE	FALSE	NA	NA	NA	NA	NA	NA	NA	NA	NA	NA	NA	0	2.03041	0	0	0	1.0152	Inf	0	0.279324	0	0	0	0.139662	Inf
CR44150	FALSE	FALSE	NA	NA	NA	NA	NA	NA	NA	NA	NA	NA	FALSE	FALSE	NA	NA	NA	NA	NA	NA	NA	NA	NA	NA	NA	0	3.04561	0	1.8506	0	2.44811	Inf	0	0.161752	0	0.0981676	0	0.12996	Inf
CR44165	FALSE	FALSE	NA	NA	NA	NA	NA	NA	NA	NA	NA	NA	FALSE	FALSE	NA	NA	NA	NA	NA	NA	NA	NA	NA	NA	NA	0	1.0152	0	0	0	0.507602	Inf	0	0.0585762	0	0	0	0.0292881	Inf
CR44172	FALSE	FALSE	NA	NA	NA	NA	NA	NA	NA	NA	NA	NA	FALSE	FALSE	NA	NA	NA	NA	NA	NA	NA	NA	NA	NA	NA	0	1.0152	0	0	0	0.507602	Inf	0	0.120187	0	0	0	0.0600935	Inf
CR44192	FALSE	FALSE	NA	NA	NA	NA	NA	NA	NA	NA	NA	NA	FALSE	FALSE	NA	NA	NA	NA	NA	NA	NA	NA	NA	NA	NA	0	1.10158	0	2.00805	0	1.55482	Inf	0	0.074394	0	0.13545	0	0.104922	Inf
CR44217	FALSE	FALSE	NA	NA	NA	NA	NA	NA	NA	NA	NA	NA	FALSE	FALSE	NA	NA	NA	NA	NA	NA	NA	NA	NA	NA	NA	0	0	0	0.925301	0	0.46265	Inf	0	0	0	0.160601	0	0.0803005	Inf
CR44218	FALSE	FALSE	NA	NA	NA	NA	NA	NA	NA	NA	NA	NA	FALSE	FALSE	NA	NA	NA	NA	NA	NA	NA	NA	NA	NA	NA	0	1.0152	0	0	0	0.507602	Inf	0	0.0855796	0	0	0	0.0427898	Inf
CR44237	FALSE	FALSE	NA	NA	NA	NA	NA	NA	NA	NA	NA	NA	FALSE	FALSE	NA	NA	NA	NA	NA	NA	NA	NA	NA	NA	NA	0	1.0152	0	0.925301	0	0.970253	Inf	0	0.0562812	0	0.0512358	0	0.0537585	Inf
CR44269	FALSE	FALSE	NA	NA	NA	NA	NA	NA	NA	NA	NA	NA	FALSE	FALSE	NA	NA	NA	NA	NA	NA	NA	NA	NA	NA	NA	0	5.42933	0	1.73753	0	3.58343	Inf	0	0.428506	0	0.13697	0	0.282738	Inf
CR44275	FALSE	FALSE	NA	NA	NA	NA	NA	NA	NA	NA	NA	NA	FALSE	FALSE	NA	NA	NA	NA	NA	NA	NA	NA	NA	NA	NA	0	1.0152	0	0	0	0.507602	Inf	0	0.046339	0	0	0	0.0231695	Inf
CR44283	FALSE	FALSE	NA	NA	NA	NA	NA	NA	NA	NA	NA	NA	FALSE	FALSE	NA	NA	NA	NA	NA	NA	NA	NA	NA	NA	NA	0	1.0152	0	3.7012	0	2.3582	Inf	0	0.190931	0	0.695261	0	0.443096	Inf
CR44284	FALSE	FALSE	NA	NA	NA	NA	NA	NA	NA	NA	NA	NA	FALSE	FALSE	NA	NA	NA	NA	NA	NA	NA	NA	NA	NA	NA	0	0	0	0.925301	0	0.46265	Inf	0	0	0	0.0608923	0	0.0304462	Inf
CR44316	FALSE	FALSE	NA	NA	NA	NA	NA	NA	NA	NA	NA	NA	FALSE	FALSE	NA	NA	NA	NA	NA	NA	NA	NA	NA	NA	NA	0	0	0	0.925301	0	0.46265	Inf	0	0	0	0.75029	0	0.375145	Inf
CR44338	FALSE	FALSE	NA	NA	NA	NA	NA	NA	NA	NA	NA	NA	FALSE	FALSE	NA	NA	NA	NA	NA	NA	NA	NA	NA	NA	NA	0	1.0152	0	0	0	0.507602	Inf	0	0.0922533	0	0	0	0.0461267	Inf
CR44344	FALSE	FALSE	NA	NA	NA	NA	NA	NA	NA	NA	NA	NA	FALSE	FALSE	NA	NA	NA	NA	NA	NA	NA	NA	NA	NA	NA	0	1.0152	0	0	0	0.507602	Inf	0	0.0440389	0	0	0	0.0220195	Inf
CR44348	FALSE	FALSE	NA	NA	NA	NA	NA	NA	NA	NA	NA	NA	FALSE	FALSE	NA	NA	NA	NA	NA	NA	NA	NA	NA	NA	NA	0	0	0	0.925301	0	0.46265	Inf	0	0	0	0.159204	0	0.0796022	Inf
CR44350	FALSE	FALSE	NA	NA	NA	NA	NA	NA	NA	NA	NA	NA	FALSE	FALSE	NA	NA	NA	NA	NA	NA	NA	NA	NA	NA	NA	0	1.0152	0	0	0	0.507602	Inf	0	0.0178712	0	0	0	0.0089356	Inf
CR44351	FALSE	FALSE	NA	NA	NA	NA	NA	NA	NA	NA	NA	NA	FALSE	FALSE	NA	NA	NA	NA	NA	NA	NA	NA	NA	NA	NA	0	3.04561	0	0	0	1.52281	Inf	0	0.138697	0	0	0	0.0693487	Inf
CR44365	FALSE	FALSE	NA	NA	NA	NA	NA	NA	NA	NA	NA	NA	FALSE	FALSE	NA	NA	NA	NA	NA	NA	NA	NA	NA	NA	NA	0	0	0	0.925301	0	0.46265	Inf	0	0	0	0.0225656	0	0.0112828	Inf
CR44396	FALSE	FALSE	NA	NA	NA	NA	NA	NA	NA	NA	NA	NA	FALSE	FALSE	NA	NA	NA	NA	NA	NA	NA	NA	NA	NA	NA	0	0	0	0.925301	0	0.46265	Inf	0	0	0	0.0975579	0	0.048779	Inf
CR44419	FALSE	FALSE	NA	NA	NA	NA	NA	NA	NA	NA	NA	NA	FALSE	FALSE	NA	NA	NA	NA	NA	NA	NA	NA	NA	NA	NA	0	1.0152	0	0	0	0.507602	Inf	0	0.150085	0	0	0	0.0750423	Inf
CR44421	FALSE	FALSE	NA	NA	NA	NA	NA	NA	NA	NA	NA	NA	FALSE	FALSE	NA	NA	NA	NA	NA	NA	NA	NA	NA	NA	NA	0	0	0	0.925301	0	0.46265	Inf	0	0	0	0.182477	0	0.0912386	Inf
CR44469	FALSE	FALSE	NA	NA	NA	NA	NA	NA	NA	NA	NA	NA	FALSE	FALSE	NA	NA	NA	NA	NA	NA	NA	NA	NA	NA	NA	0	1.0152	0	0	0	0.507602	Inf	0	0.676486	0	0	0	0.338243	Inf
CR44493	FALSE	FALSE	NA	NA	NA	NA	NA	NA	NA	NA	NA	NA	FALSE	FALSE	NA	NA	NA	NA	NA	NA	NA	NA	NA	NA	NA	0	1.0152	0	0	0	0.507602	Inf	0	0.396416	0	0	0	0.198208	Inf
CR44494	FALSE	FALSE	NA	NA	NA	NA	NA	NA	NA	NA	NA	NA	FALSE	FALSE	NA	NA	NA	NA	NA	NA	NA	NA	NA	NA	NA	0	2.03041	0	2.7759	0	2.40316	Inf	0	0.145557	0	0.198763	0	0.17216	Inf
CR44498	FALSE	FALSE	NA	NA	NA	NA	NA	NA	NA	NA	NA	NA	FALSE	FALSE	NA	NA	NA	NA	NA	NA	NA	NA	NA	NA	NA	0	1.0152	0	0	0	0.507602	Inf	0	0.0317043	0	0	0	0.0158521	Inf
CR44502	FALSE	FALSE	NA	NA	NA	NA	NA	NA	NA	NA	NA	NA	FALSE	FALSE	NA	NA	NA	NA	NA	NA	NA	NA	NA	NA	NA	0	4.06082	0	0	0	2.03041	Inf	0	0.63177	0	0	0	0.315885	Inf
CR44535	FALSE	FALSE	NA	NA	NA	NA	NA	NA	NA	NA	NA	NA	FALSE	FALSE	NA	NA	NA	NA	NA	NA	NA	NA	NA	NA	NA	0	0.619601	0	1.12946	0	0.874531	Inf	0	0.032951	0	0.0599942	0	0.0464726	Inf
CR44543	FALSE	FALSE	NA	NA	NA	NA	NA	NA	NA	NA	NA	NA	FALSE	FALSE	NA	NA	NA	NA	NA	NA	NA	NA	NA	NA	NA	0	1.0152	0	0	0	0.507602	Inf	0	0.354781	0	0	0	0.17739	Inf
CR44547	FALSE	FALSE	NA	NA	NA	NA	NA	NA	NA	NA	NA	NA	FALSE	FALSE	NA	NA	NA	NA	NA	NA	NA	NA	NA	NA	NA	0	0	0	1.8506	0	0.925301	Inf	0	0	0	0.267277	0	0.133638	Inf
CR44556	FALSE	FALSE	NA	NA	NA	NA	NA	NA	NA	NA	NA	NA	FALSE	FALSE	NA	NA	NA	NA	NA	NA	NA	NA	NA	NA	NA	0	1.0152	0	0	0	0.507602	Inf	0	0.130311	0	0	0	0.0651554	Inf
CR44570	FALSE	FALSE	NA	NA	NA	NA	NA	NA	NA	NA	NA	NA	FALSE	FALSE	NA	NA	NA	NA	NA	NA	NA	NA	NA	NA	NA	0	1.0152	0	0	0	0.507602	Inf	0	0.298679	0	0	0	0.14934	Inf
CR44572	FALSE	FALSE	NA	NA	NA	NA	NA	NA	NA	NA	NA	NA	FALSE	FALSE	NA	NA	NA	NA	NA	NA	NA	NA	NA	NA	NA	0	1.0152	0	0	0	0.507602	Inf	0	0.060213	0	0	0	0.0301065	Inf
CR44573	FALSE	FALSE	NA	NA	NA	NA	NA	NA	NA	NA	NA	NA	FALSE	FALSE	NA	NA	NA	NA	NA	NA	NA	NA	NA	NA	NA	0	1.0152	0	0	0	0.507602	Inf	0	0.0401687	0	0	0	0.0200843	Inf
CR44587	FALSE	FALSE	NA	NA	NA	NA	NA	NA	NA	NA	NA	NA	FALSE	FALSE	NA	NA	NA	NA	NA	NA	NA	NA	NA	NA	NA	0	1.0152	0	0	0	0.507602	Inf	0	0.0690315	0	0	0	0.0345157	Inf
CR44588	FALSE	FALSE	NA	NA	NA	NA	NA	NA	NA	NA	NA	NA	FALSE	FALSE	NA	NA	NA	NA	NA	NA	NA	NA	NA	NA	NA	0	0	0	0.925301	0	0.46265	Inf	0	0	0	0.317399	0	0.1587	Inf
CR44609	FALSE	FALSE	NA	NA	NA	NA	NA	NA	NA	NA	NA	NA	FALSE	FALSE	NA	NA	NA	NA	NA	NA	NA	NA	NA	NA	NA	0	0	0	0.925301	0	0.46265	Inf	0	0	0	0.0520121	0	0.0260061	Inf
CR44628	FALSE	FALSE	NA	NA	NA	NA	NA	NA	NA	NA	NA	NA	FALSE	FALSE	NA	NA	NA	NA	NA	NA	NA	NA	NA	NA	NA	0	0	0	0.925301	0	0.46265	Inf	0	0	0	0.156038	0	0.0780192	Inf
CR44630	FALSE	FALSE	NA	NA	NA	NA	NA	NA	NA	NA	NA	NA	FALSE	FALSE	NA	NA	NA	NA	NA	NA	NA	NA	NA	NA	NA	0	1.0152	0	0	0	0.507602	Inf	0	0.150085	0	0	0	0.0750423	Inf
CR44640	FALSE	FALSE	NA	NA	NA	NA	NA	NA	NA	NA	NA	NA	FALSE	FALSE	NA	NA	NA	NA	NA	NA	NA	NA	NA	NA	NA	0	1.0152	0	0.925301	0	0.970253	Inf	0	0.100222	0	0.0912377	0	0.0957299	Inf
CR44642	FALSE	FALSE	NA	NA	NA	NA	NA	NA	NA	NA	NA	NA	FALSE	FALSE	NA	NA	NA	NA	NA	NA	NA	NA	NA	NA	NA	0	1.0152	0	0	0	0.507602	Inf	0	0.120187	0	0	0	0.0600935	Inf
CR44651	FALSE	FALSE	NA	NA	NA	NA	NA	NA	NA	NA	NA	NA	FALSE	FALSE	NA	NA	NA	NA	NA	NA	NA	NA	NA	NA	NA	0	0	0	1.8506	0	0.925301	Inf	0	0	0	0.121515	0	0.0607576	Inf
CR44659	FALSE	FALSE	NA	NA	NA	NA	NA	NA	NA	NA	NA	NA	FALSE	FALSE	NA	NA	NA	NA	NA	NA	NA	NA	NA	NA	NA	0	1.0152	0	0.925301	0	0.970253	Inf	0	0.199783	0	0.181873	0	0.190828	Inf
CR44661	FALSE	FALSE	NA	NA	NA	NA	NA	NA	NA	NA	NA	NA	FALSE	FALSE	NA	NA	NA	NA	NA	NA	NA	NA	NA	NA	NA	0	2.03041	0	0.925301	0	1.47786	Inf	0	0.445273	0	0.202678	0	0.323976	Inf
CR44712	FALSE	FALSE	NA	NA	NA	NA	NA	NA	NA	NA	NA	NA	FALSE	FALSE	NA	NA	NA	NA	NA	NA	NA	NA	NA	NA	NA	0	0	0	3.7012	0	1.8506	Inf	0	0	0	1.02665	0	0.513323	Inf
CR44720	FALSE	FALSE	NA	NA	NA	NA	NA	NA	NA	NA	NA	NA	FALSE	FALSE	NA	NA	NA	NA	NA	NA	NA	NA	NA	NA	NA	0	1.0152	0	0	0	0.507602	Inf	0	0.149342	0	0	0	0.0746708	Inf
CR44748	FALSE	FALSE	NA	NA	NA	NA	NA	NA	NA	NA	NA	NA	FALSE	FALSE	NA	NA	NA	NA	NA	NA	NA	NA	NA	NA	NA	0	0	0	0.925301	0	0.46265	Inf	0	0	0	0.109195	0	0.0545976	Inf
CR44751	FALSE	FALSE	NA	NA	NA	NA	NA	NA	NA	NA	NA	NA	FALSE	FALSE	NA	NA	NA	NA	NA	NA	NA	NA	NA	NA	NA	0	0.544813	0	0	0	0.272407	Inf	0	0.132022	0	0	0	0.0660108	Inf
CR44755	FALSE	FALSE	NA	NA	NA	NA	NA	NA	NA	NA	NA	NA	FALSE	FALSE	NA	NA	NA	NA	NA	NA	NA	NA	NA	NA	NA	0	1.0152	0	0	0	0.507602	Inf	0	0.199783	0	0	0	0.0998913	Inf
CR44763	FALSE	FALSE	NA	NA	NA	NA	NA	NA	NA	NA	NA	NA	FALSE	FALSE	NA	NA	NA	NA	NA	NA	NA	NA	NA	NA	NA	0	1.0152	0	0	0	0.507602	Inf	0	0.100222	0	0	0	0.0501111	Inf
CR44778	FALSE	FALSE	NA	NA	NA	NA	NA	NA	NA	NA	NA	NA	FALSE	FALSE	NA	NA	NA	NA	NA	NA	NA	NA	NA	NA	NA	0	0	0	0.925301	0	0.46265	Inf	0	0	0	0.0755502	0	0.0377751	Inf
CR44785	FALSE	FALSE	NA	NA	NA	NA	NA	NA	NA	NA	NA	NA	FALSE	FALSE	NA	NA	NA	NA	NA	NA	NA	NA	NA	NA	NA	0	1.0152	0	0.925301	0	0.970253	Inf	0	0.135278	0	0.123151	0	0.129214	Inf
CR44797	FALSE	FALSE	NA	NA	NA	NA	NA	NA	NA	NA	NA	NA	FALSE	FALSE	NA	NA	NA	NA	NA	NA	NA	NA	NA	NA	NA	0	0	0	1.8506	0	0.925301	Inf	0	0	0	0.305141	0	0.152571	Inf
CR44811	FALSE	FALSE	NA	NA	NA	NA	NA	NA	NA	NA	NA	NA	FALSE	FALSE	NA	NA	NA	NA	NA	NA	NA	NA	NA	NA	NA	0	2.03041	0	0	0	1.0152	Inf	0	0.117039	0	0	0	0.0585193	Inf
CR44832	FALSE	FALSE	NA	NA	NA	NA	NA	NA	NA	NA	NA	NA	FALSE	FALSE	NA	NA	NA	NA	NA	NA	NA	NA	NA	NA	NA	0	0	0	0.925301	0	0.46265	Inf	0	0	0	0.142294	0	0.0711469	Inf
CR44847	FALSE	FALSE	NA	NA	NA	NA	NA	NA	NA	NA	NA	NA	FALSE	FALSE	NA	NA	NA	NA	NA	NA	NA	NA	NA	NA	NA	0	1.0152	0	0	0	0.507602	Inf	0	0.11784	0	0	0	0.0589198	Inf
CR44849	FALSE	FALSE	NA	NA	NA	NA	NA	NA	NA	NA	NA	NA	FALSE	FALSE	NA	NA	NA	NA	NA	NA	NA	NA	NA	NA	NA	0	0	0	0.925301	0	0.46265	Inf	0	0	0	0.0750341	0	0.0375171	Inf
CR44854	FALSE	FALSE	NA	NA	NA	NA	NA	NA	NA	NA	NA	NA	FALSE	FALSE	NA	NA	NA	NA	NA	NA	NA	NA	NA	NA	NA	0	1.0152	0	0	0	0.507602	Inf	0	0.17539	0	0	0	0.087695	Inf
CR44898	FALSE	FALSE	NA	NA	NA	NA	NA	NA	NA	NA	NA	NA	FALSE	FALSE	NA	NA	NA	NA	NA	NA	NA	NA	NA	NA	NA	0	0.907601	0	1.36279	0	1.1352	Inf	0	0.0516158	0	0.0774103	0	0.0645131	Inf
CR44900	FALSE	FALSE	NA	NA	NA	NA	NA	NA	NA	NA	NA	NA	FALSE	FALSE	NA	NA	NA	NA	NA	NA	NA	NA	NA	NA	NA	0	1.0152	0	0	0	0.507602	Inf	0	0.12091	0	0	0	0.0604548	Inf
CR44904	FALSE	FALSE	NA	NA	NA	NA	NA	NA	NA	NA	NA	NA	FALSE	FALSE	NA	NA	NA	NA	NA	NA	NA	NA	NA	NA	NA	0	1.0152	0	0	0	0.507602	Inf	0	0.381533	0	0	0	0.190766	Inf
CR44912	FALSE	FALSE	NA	NA	NA	NA	NA	NA	NA	NA	NA	NA	FALSE	FALSE	NA	NA	NA	NA	NA	NA	NA	NA	NA	NA	NA	0	1.0152	0	1.8506	0	1.4329	Inf	0	0.0953139	0	0.173539	0	0.134426	Inf
CR44916	FALSE	FALSE	NA	NA	NA	NA	NA	NA	NA	NA	NA	NA	FALSE	FALSE	NA	NA	NA	NA	NA	NA	NA	NA	NA	NA	NA	0	0	0	2.32522	0	1.16261	Inf	0	0	0	0.387708	0	0.193854	Inf
CR44917	FALSE	FALSE	NA	NA	NA	NA	NA	NA	NA	NA	NA	NA	FALSE	FALSE	NA	NA	NA	NA	NA	NA	NA	NA	NA	NA	NA	0	3.04561	0	3.87645	0	3.46103	Inf	0	0.27466	0	0.349169	0	0.311915	Inf
CR44918	FALSE	FALSE	NA	NA	NA	NA	NA	NA	NA	NA	NA	NA	FALSE	FALSE	NA	NA	NA	NA	NA	NA	NA	NA	NA	NA	NA	0	0	0	6.47711	0	3.23855	Inf	0	0	0	0.356986	0	0.178493	Inf
CR44919	FALSE	FALSE	NA	NA	NA	NA	NA	NA	NA	NA	NA	NA	FALSE	FALSE	NA	NA	NA	NA	NA	NA	NA	NA	NA	NA	NA	0	0	0	0.925301	0	0.46265	Inf	0	0	0	0.0607576	0	0.0303788	Inf
CR44922	FALSE	FALSE	NA	NA	NA	NA	NA	NA	NA	NA	NA	NA	FALSE	FALSE	NA	NA	NA	NA	NA	NA	NA	NA	NA	NA	NA	0	0	0	1.8506	0	0.925301	Inf	0	0	0	0.0473897	0	0.0236948	Inf
CR44936	FALSE	FALSE	NA	NA	NA	NA	NA	NA	NA	NA	NA	NA	FALSE	FALSE	NA	NA	NA	NA	NA	NA	NA	NA	NA	NA	NA	0	0	0	0.925301	0	0.46265	Inf	0	0	0	0.0466255	0	0.0233127	Inf
CR44940	FALSE	FALSE	NA	NA	NA	NA	NA	NA	NA	NA	NA	NA	FALSE	FALSE	NA	NA	NA	NA	NA	NA	NA	NA	NA	NA	NA	0	1.0152	0	0	0	0.507602	Inf	0	0.08744	0	0	0	0.04372	Inf
CR44951	FALSE	FALSE	NA	NA	NA	NA	NA	NA	NA	NA	NA	NA	FALSE	FALSE	NA	NA	NA	NA	NA	NA	NA	NA	NA	NA	NA	0	0	0	0.925301	0	0.46265	Inf	0	0	0	0.0483919	0	0.0241959	Inf
CR44961	FALSE	FALSE	NA	NA	NA	NA	NA	NA	NA	NA	NA	NA	FALSE	FALSE	NA	NA	NA	NA	NA	NA	NA	NA	NA	NA	NA	0	1.0152	0	0.925301	0	0.970253	Inf	0	0.0236694	0	0.0215475	0	0.0226084	Inf
CR44968	FALSE	FALSE	NA	NA	NA	NA	NA	NA	NA	NA	NA	NA	FALSE	FALSE	NA	NA	NA	NA	NA	NA	NA	NA	NA	NA	NA	0	0	0	0.946395	0	0.473197	Inf	0	0	0	0.166947	0	0.0834735	Inf
CR44970	FALSE	FALSE	NA	NA	NA	NA	NA	NA	NA	NA	NA	NA	FALSE	FALSE	NA	NA	NA	NA	NA	NA	NA	NA	NA	NA	NA	0	0.826117	0	0	0	0.413059	Inf	0	0.262324	0	0	0	0.131162	Inf
CR44988	FALSE	FALSE	NA	NA	NA	NA	NA	NA	NA	NA	NA	NA	FALSE	FALSE	NA	NA	NA	NA	NA	NA	NA	NA	NA	NA	NA	0	1.0152	0	0.925301	0	0.970253	Inf	0	0.172383	0	0.15693	0	0.164657	Inf
CR45020	FALSE	FALSE	NA	NA	NA	NA	NA	NA	NA	NA	NA	NA	FALSE	FALSE	NA	NA	NA	NA	NA	NA	NA	NA	NA	NA	NA	0	0	0	0.925301	0	0.46265	Inf	0	0	0	0.273256	0	0.136628	Inf
CR45028	FALSE	FALSE	NA	NA	NA	NA	NA	NA	NA	NA	NA	NA	FALSE	FALSE	NA	NA	NA	NA	NA	NA	NA	NA	NA	NA	NA	0	1.0152	0	0	0	0.507602	Inf	0	0.0847382	0	0	0	0.0423691	Inf
CR45039	FALSE	FALSE	NA	NA	NA	NA	NA	NA	NA	NA	NA	NA	FALSE	FALSE	NA	NA	NA	NA	NA	NA	NA	NA	NA	NA	NA	0	0	0	1.8506	0	0.925301	Inf	0	0	0	0.294506	0	0.147253	Inf
CR45042	FALSE	FALSE	NA	NA	NA	NA	NA	NA	NA	NA	NA	NA	FALSE	FALSE	NA	NA	NA	NA	NA	NA	NA	NA	NA	NA	NA	0	0	0	0.925301	0	0.46265	Inf	0	0	0	0.117865	0	0.0589327	Inf
CR45115	FALSE	FALSE	NA	NA	NA	NA	NA	NA	NA	NA	NA	NA	FALSE	FALSE	NA	NA	NA	NA	NA	NA	NA	NA	NA	NA	NA	0	1.05014	0	0	0	0.525071	Inf	0	0.0814218	0	0	0	0.0407109	Inf
CR45119	FALSE	FALSE	NA	NA	NA	NA	NA	NA	NA	NA	NA	NA	FALSE	FALSE	NA	NA	NA	NA	NA	NA	NA	NA	NA	NA	NA	0	1.0152	0	0	0	0.507602	Inf	0	0.270558	0	0	0	0.135279	Inf
CR45121	FALSE	FALSE	NA	NA	NA	NA	NA	NA	NA	NA	NA	NA	FALSE	FALSE	NA	NA	NA	NA	NA	NA	NA	NA	NA	NA	NA	0	0	0	0.925301	0	0.46265	Inf	0	0	0	0.154285	0	0.0771425	Inf
CR45127	FALSE	FALSE	NA	NA	NA	NA	NA	NA	NA	NA	NA	NA	FALSE	FALSE	NA	NA	NA	NA	NA	NA	NA	NA	NA	NA	NA	0	1.0152	0	0.925301	0	0.970253	Inf	0	0.0616907	0	0.0561604	0	0.0589255	Inf
CR45163	FALSE	FALSE	NA	NA	NA	NA	NA	NA	NA	NA	NA	NA	FALSE	FALSE	NA	NA	NA	NA	NA	NA	NA	NA	NA	NA	NA	0	1.0152	0	0	0	0.507602	Inf	0	0.252446	0	0	0	0.126223	Inf
CR45179	FALSE	FALSE	NA	NA	NA	NA	NA	NA	NA	NA	NA	NA	FALSE	FALSE	NA	NA	NA	NA	NA	NA	NA	NA	NA	NA	NA	0	0	0	1.431	0	0.7155	Inf	0	0	0	0.182477	0	0.0912386	Inf
CR45185	FALSE	FALSE	NA	NA	NA	NA	NA	NA	NA	NA	NA	NA	FALSE	FALSE	NA	NA	NA	NA	NA	NA	NA	NA	NA	NA	NA	0	0	0	4.98419	0	2.49209	Inf	0	0	0	0.0996815	0	0.0498407	Inf
CR45192	FALSE	FALSE	NA	NA	NA	NA	NA	NA	NA	NA	NA	NA	FALSE	FALSE	NA	NA	NA	NA	NA	NA	NA	NA	NA	NA	NA	0	0	0	0.954832	0	0.477416	Inf	0	0	0	0.129847	0	0.0649235	Inf
CR45198	FALSE	FALSE	NA	NA	NA	NA	NA	NA	NA	NA	NA	NA	FALSE	FALSE	NA	NA	NA	NA	NA	NA	NA	NA	NA	NA	NA	0	0	0	0.925301	0	0.46265	Inf	0	0	0	0.338827	0	0.169413	Inf
CR45199	FALSE	FALSE	NA	NA	NA	NA	NA	NA	NA	NA	NA	NA	FALSE	FALSE	NA	NA	NA	NA	NA	NA	NA	NA	NA	NA	NA	0	0	0	0.925301	0	0.46265	Inf	0	0	0	0.121516	0	0.060758	Inf
CR45205	FALSE	FALSE	NA	NA	NA	NA	NA	NA	NA	NA	NA	NA	FALSE	FALSE	NA	NA	NA	NA	NA	NA	NA	NA	NA	NA	NA	0	0	0	0.925301	0	0.46265	Inf	0	0	0	0.0527616	0	0.0263808	Inf
CR45211	FALSE	FALSE	NA	NA	NA	NA	NA	NA	NA	NA	NA	NA	FALSE	FALSE	NA	NA	NA	NA	NA	NA	NA	NA	NA	NA	NA	0	2.03041	0	0.925301	0	1.47786	Inf	0	1.66427	0	0.757536	0	1.2109	Inf
CR45239	FALSE	FALSE	NA	NA	NA	NA	NA	NA	NA	NA	NA	NA	FALSE	FALSE	NA	NA	NA	NA	NA	NA	NA	NA	NA	NA	NA	0	0	0	0.925301	0	0.46265	Inf	0	0	0	0.139405	0	0.0697023	Inf
CR45241	FALSE	FALSE	NA	NA	NA	NA	NA	NA	NA	NA	NA	NA	FALSE	FALSE	NA	NA	NA	NA	NA	NA	NA	NA	NA	NA	NA	0	1.0152	0	1.8506	0	1.4329	Inf	0	0.320901	0	0.584268	0	0.452585	Inf
CR45252	FALSE	FALSE	NA	NA	NA	NA	NA	NA	NA	NA	NA	NA	FALSE	FALSE	NA	NA	NA	NA	NA	NA	NA	NA	NA	NA	NA	0	0	0	0.925301	0	0.46265	Inf	0	0	0	0.176044	0	0.0880218	Inf
CR45259	FALSE	FALSE	NA	NA	NA	NA	NA	NA	NA	NA	NA	NA	FALSE	FALSE	NA	NA	NA	NA	NA	NA	NA	NA	NA	NA	NA	0	0	0	0.925301	0	0.46265	Inf	0	0	0	0.204185	0	0.102093	Inf
CR45279	FALSE	FALSE	NA	NA	NA	NA	NA	NA	NA	NA	NA	NA	FALSE	FALSE	NA	NA	NA	NA	NA	NA	NA	NA	NA	NA	NA	0	0	0	0.925301	0	0.46265	Inf	0	0	0	0.126556	0	0.063278	Inf
CR45290	FALSE	FALSE	NA	NA	NA	NA	NA	NA	NA	NA	NA	NA	FALSE	FALSE	NA	NA	NA	NA	NA	NA	NA	NA	NA	NA	NA	0	1.0152	0	0.925301	0	0.970253	Inf	0	0.151213	0	0.137658	0	0.144435	Inf
CR45306	FALSE	FALSE	NA	NA	NA	NA	NA	NA	NA	NA	NA	NA	FALSE	FALSE	NA	NA	NA	NA	NA	NA	NA	NA	NA	NA	NA	0	1.0152	0	0	0	0.507602	Inf	0	0.172383	0	0	0	0.0861917	Inf
CR45327	FALSE	FALSE	NA	NA	NA	NA	NA	NA	NA	NA	NA	NA	FALSE	FALSE	NA	NA	NA	NA	NA	NA	NA	NA	NA	NA	NA	0	1.0152	0	0	0	0.507602	Inf	0	0.110501	0	0	0	0.0552507	Inf
CR45331	FALSE	FALSE	NA	NA	NA	NA	NA	NA	NA	NA	NA	NA	FALSE	FALSE	NA	NA	NA	NA	NA	NA	NA	NA	NA	NA	NA	0	2.03041	0	0	0	1.0152	Inf	0	0.360204	0	0	0	0.180102	Inf
CR45332	FALSE	FALSE	NA	NA	NA	NA	NA	NA	NA	NA	NA	NA	FALSE	FALSE	NA	NA	NA	NA	NA	NA	NA	NA	NA	NA	NA	0	0	0	0.925301	0	0.46265	Inf	0	0	0	0.0800656	0	0.0400328	Inf
CR45334	FALSE	FALSE	NA	NA	NA	NA	NA	NA	NA	NA	NA	NA	FALSE	FALSE	NA	NA	NA	NA	NA	NA	NA	NA	NA	NA	NA	0	0	0	3.7012	0	1.8506	Inf	0	0	0	0.187457	0	0.0937283	Inf
CR45346	FALSE	FALSE	NA	NA	NA	NA	NA	NA	NA	NA	NA	NA	FALSE	FALSE	NA	NA	NA	NA	NA	NA	NA	NA	NA	NA	NA	0	1.0152	0	0.925301	0	0.970253	Inf	0	0.135278	0	0.123151	0	0.129214	Inf
CR45382	FALSE	FALSE	NA	NA	NA	NA	NA	NA	NA	NA	NA	NA	FALSE	FALSE	NA	NA	NA	NA	NA	NA	NA	NA	NA	NA	NA	0	1.0152	0	0	0	0.507602	Inf	0	0.214713	0	0	0	0.107357	Inf
CR45392	FALSE	FALSE	NA	NA	NA	NA	NA	NA	NA	NA	NA	NA	FALSE	FALSE	NA	NA	NA	NA	NA	NA	NA	NA	NA	NA	NA	0	0	0	0.925301	0	0.46265	Inf	0	0	0	0.169523	0	0.0847617	Inf
CR45393	FALSE	FALSE	NA	NA	NA	NA	NA	NA	NA	NA	NA	NA	FALSE	FALSE	NA	NA	NA	NA	NA	NA	NA	NA	NA	NA	NA	0	1.0152	0	0	0	0.507602	Inf	0	0.194627	0	0	0	0.0973134	Inf
CR45401	FALSE	FALSE	NA	NA	NA	NA	NA	NA	NA	NA	NA	NA	FALSE	FALSE	NA	NA	NA	NA	NA	NA	NA	NA	NA	NA	NA	0	1.0152	0	0.925301	0	0.970253	Inf	0	0.283259	0	0.257866	0	0.270563	Inf
CR45404	FALSE	FALSE	NA	NA	NA	NA	NA	NA	NA	NA	NA	NA	FALSE	FALSE	NA	NA	NA	NA	NA	NA	NA	NA	NA	NA	NA	0	1.0152	0	0.925301	0	0.970253	Inf	0	0.240377	0	0.218828	0	0.229603	Inf
CR45406	FALSE	FALSE	NA	NA	NA	NA	NA	NA	NA	NA	NA	NA	FALSE	FALSE	NA	NA	NA	NA	NA	NA	NA	NA	NA	NA	NA	0	1.0152	0	0.925301	0	0.970253	Inf	0	0.126486	0	0.115147	0	0.120817	Inf
CR45417	FALSE	FALSE	NA	NA	NA	NA	NA	NA	NA	NA	NA	NA	FALSE	FALSE	NA	NA	NA	NA	NA	NA	NA	NA	NA	NA	NA	0	1.0152	0	0	0	0.507602	Inf	0	0.199783	0	0	0	0.0998913	Inf
CR45463	FALSE	FALSE	NA	NA	NA	NA	NA	NA	NA	NA	NA	NA	FALSE	FALSE	NA	NA	NA	NA	NA	NA	NA	NA	NA	NA	NA	0	2.03041	0	0	0	1.0152	Inf	0	1.52721	0	0	0	0.763607	Inf
CR45483	FALSE	FALSE	NA	NA	NA	NA	NA	NA	NA	NA	NA	NA	FALSE	FALSE	NA	NA	NA	NA	NA	NA	NA	NA	NA	NA	NA	0	1.0152	0	0	0	0.507602	Inf	0	0.113409	0	0	0	0.0567047	Inf
CR45500	FALSE	FALSE	NA	NA	NA	NA	NA	NA	NA	NA	NA	NA	FALSE	FALSE	NA	NA	NA	NA	NA	NA	NA	NA	NA	NA	NA	0	1.0152	0	0.925301	0	0.970253	Inf	0	0.0960727	0	0.0874603	0	0.0917665	Inf
CR45504	FALSE	FALSE	NA	NA	NA	NA	NA	NA	NA	NA	NA	NA	FALSE	FALSE	NA	NA	NA	NA	NA	NA	NA	NA	NA	NA	NA	0	0	0	0.925301	0	0.46265	Inf	0	0	0	0.0472675	0	0.0236337	Inf
CR45507	FALSE	FALSE	NA	NA	NA	NA	NA	NA	NA	NA	NA	NA	FALSE	FALSE	NA	NA	NA	NA	NA	NA	NA	NA	NA	NA	NA	0	0	0	1.8506	0	0.925301	Inf	0	0	0	0.39946	0	0.19973	Inf
CR45509	FALSE	FALSE	NA	NA	NA	NA	NA	NA	NA	NA	NA	NA	FALSE	FALSE	NA	NA	NA	NA	NA	NA	NA	NA	NA	NA	NA	0	0	0	0.925301	0	0.46265	Inf	0	0	0	0.548278	0	0.274139	Inf
CR45520	FALSE	FALSE	NA	NA	NA	NA	NA	NA	NA	NA	NA	NA	FALSE	FALSE	NA	NA	NA	NA	NA	NA	NA	NA	NA	NA	NA	0	0	0	0.925301	0	0.46265	Inf	0	0	0	0.0239532	0	0.0119766	Inf
CR45523	FALSE	FALSE	NA	NA	NA	NA	NA	NA	NA	NA	NA	NA	FALSE	FALSE	NA	NA	NA	NA	NA	NA	NA	NA	NA	NA	NA	0	1.0152	0	0.925301	0	0.970253	Inf	0	0.113409	0	0.103243	0	0.108326	Inf
CR45533	FALSE	FALSE	NA	NA	NA	NA	NA	NA	NA	NA	NA	NA	FALSE	FALSE	NA	NA	NA	NA	NA	NA	NA	NA	NA	NA	NA	0	0	0	0.925301	0	0.46265	Inf	0	0	0	0.0121139	0	0.00605697	Inf
CR45534	FALSE	FALSE	NA	NA	NA	NA	NA	NA	NA	NA	NA	NA	FALSE	FALSE	NA	NA	NA	NA	NA	NA	NA	NA	NA	NA	NA	0	0	0	0.925301	0	0.46265	Inf	0	0	0	0.0937288	0	0.0468644	Inf
CR45553	FALSE	FALSE	NA	NA	NA	NA	NA	NA	NA	NA	NA	NA	FALSE	FALSE	NA	NA	NA	NA	NA	NA	NA	NA	NA	NA	NA	0	0	0	0.996582	0	0.498291	Inf	0	0	0	0.0532217	0	0.0266109	Inf
CR45570	FALSE	FALSE	NA	NA	NA	NA	NA	NA	NA	NA	NA	NA	FALSE	FALSE	NA	NA	NA	NA	NA	NA	NA	NA	NA	NA	NA	0	1.0152	0	1.8506	0	1.4329	Inf	0	0.166669	0	0.303456	0	0.235062	Inf
CR45572	FALSE	FALSE	NA	NA	NA	NA	NA	NA	NA	NA	NA	NA	FALSE	FALSE	NA	NA	NA	NA	NA	NA	NA	NA	NA	NA	NA	0	1.0152	0	0	0	0.507602	Inf	0	0.0430338	0	0	0	0.0215169	Inf
CR45591	FALSE	FALSE	NA	NA	NA	NA	NA	NA	NA	NA	NA	NA	FALSE	FALSE	NA	NA	NA	NA	NA	NA	NA	NA	NA	NA	NA	0	0	0	1.8506	0	0.925301	Inf	0	0	0	0.745919	0	0.372959	Inf
CR45592	FALSE	FALSE	NA	NA	NA	NA	NA	NA	NA	NA	NA	NA	FALSE	FALSE	NA	NA	NA	NA	NA	NA	NA	NA	NA	NA	NA	0	0	0	0.639845	0	0.319922	Inf	0	0	0	0.38246	0	0.19123	Inf
CR45593	FALSE	FALSE	NA	NA	NA	NA	NA	NA	NA	NA	NA	NA	FALSE	FALSE	NA	NA	NA	NA	NA	NA	NA	NA	NA	NA	NA	0	0.768669	0	0	0	0.384335	Inf	0	0.0664466	0	0	0	0.0332233	Inf
CR45597	FALSE	FALSE	NA	NA	NA	NA	NA	NA	NA	NA	NA	NA	FALSE	FALSE	NA	NA	NA	NA	NA	NA	NA	NA	NA	NA	NA	0	1.0152	0	1.8506	0	1.4329	Inf	0	0.324347	0	0.590541	0	0.457444	Inf
CR45621	FALSE	FALSE	NA	NA	NA	NA	NA	NA	NA	NA	NA	NA	FALSE	FALSE	NA	NA	NA	NA	NA	NA	NA	NA	NA	NA	NA	0	0.477596	0	0	0	0.238798	Inf	0	0.0367662	0	0	0	0.0183831	Inf
CR45622	FALSE	FALSE	NA	NA	NA	NA	NA	NA	NA	NA	NA	NA	FALSE	FALSE	NA	NA	NA	NA	NA	NA	NA	NA	NA	NA	NA	0	0	0	0.925301	0	0.46265	Inf	0	0	0	0.0708709	0	0.0354354	Inf
CR45629	FALSE	FALSE	NA	NA	NA	NA	NA	NA	NA	NA	NA	NA	FALSE	FALSE	NA	NA	NA	NA	NA	NA	NA	NA	NA	NA	NA	0	1.35516	0	0	0	0.67758	Inf	0	0.276763	0	0	0	0.138382	Inf
CR45632	FALSE	FALSE	NA	NA	NA	NA	NA	NA	NA	NA	NA	NA	FALSE	FALSE	NA	NA	NA	NA	NA	NA	NA	NA	NA	NA	NA	0	2.03041	0	0	0	1.0152	Inf	0	0.615634	0	0	0	0.307817	Inf
CR45635	FALSE	FALSE	NA	NA	NA	NA	NA	NA	NA	NA	NA	NA	FALSE	FALSE	NA	NA	NA	NA	NA	NA	NA	NA	NA	NA	NA	0	1.0152	0	0.925301	0	0.970253	Inf	0	0.150085	0	0.13663	0	0.143357	Inf
CR45645	FALSE	FALSE	NA	NA	NA	NA	NA	NA	NA	NA	NA	NA	FALSE	FALSE	NA	NA	NA	NA	NA	NA	NA	NA	NA	NA	NA	0	0	0	0.925301	0	0.46265	Inf	0	0	0	0.108763	0	0.0543814	Inf
CR45674	FALSE	FALSE	NA	NA	NA	NA	NA	NA	NA	NA	NA	NA	FALSE	FALSE	NA	NA	NA	NA	NA	NA	NA	NA	NA	NA	NA	0	1.0152	0	0	0	0.507602	Inf	0	0.26347	0	0	0	0.131735	Inf
CR45680	FALSE	FALSE	NA	NA	NA	NA	NA	NA	NA	NA	NA	NA	FALSE	FALSE	NA	NA	NA	NA	NA	NA	NA	NA	NA	NA	NA	0	1.0152	0	0	0	0.507602	Inf	0	0.0987458	0	0	0	0.0493729	Inf
CR45708	FALSE	FALSE	NA	NA	NA	NA	NA	NA	NA	NA	NA	NA	FALSE	FALSE	NA	NA	NA	NA	NA	NA	NA	NA	NA	NA	NA	0	0	0	1.8506	0	0.925301	Inf	0	0	0	0.57211	0	0.286055	Inf
CR45712	FALSE	FALSE	NA	NA	NA	NA	NA	NA	NA	NA	NA	NA	FALSE	FALSE	NA	NA	NA	NA	NA	NA	NA	NA	NA	NA	NA	0	0	0	1.8506	0	0.925301	Inf	0	0	0	0.176324	0	0.0881622	Inf
CR45713	FALSE	FALSE	NA	NA	NA	NA	NA	NA	NA	NA	NA	NA	FALSE	FALSE	NA	NA	NA	NA	NA	NA	NA	NA	NA	NA	NA	0	0	0	0.925301	0	0.46265	Inf	0	0	0	0.0502974	0	0.0251487	Inf
CR45744	FALSE	FALSE	NA	NA	NA	NA	NA	NA	NA	NA	NA	NA	FALSE	FALSE	NA	NA	NA	NA	NA	NA	NA	NA	NA	NA	NA	0	1.0152	0	0	0	0.507602	Inf	0	0.288679	0	0	0	0.14434	Inf
CR45752	FALSE	FALSE	NA	NA	NA	NA	NA	NA	NA	NA	NA	NA	FALSE	FALSE	NA	NA	NA	NA	NA	NA	NA	NA	NA	NA	NA	0	1.0152	0	0	0	0.507602	Inf	0	0.162188	0	0	0	0.0810942	Inf
CR45758	FALSE	FALSE	NA	NA	NA	NA	NA	NA	NA	NA	NA	NA	FALSE	FALSE	NA	NA	NA	NA	NA	NA	NA	NA	NA	NA	NA	0	1.0152	0	1.8506	0	1.4329	Inf	0	0.111729	0	0.203426	0	0.157578	Inf
Crz	TRUE	FALSE	NA	NA	NA	NA	NA	NA	NA	NA	NA	NA	TRUE	FALSE	NA	NA	NA	NA	NA	NA	NA	NA	NA	NA	NA	0	0	0	1.8506	0	0.925301	Inf	0	0	0	0.24143	0	0.120715	Inf
CS-2	TRUE	FALSE	NA	NA	NA	NA	NA	NA	NA	NA	NA	NA	TRUE	FALSE	NA	NA	NA	NA	NA	NA	NA	NA	NA	NA	NA	0	3.04605	0	14.8069	0	8.92645	Inf	0	0.0420158	0	0.203995	0	0.123006	Inf
Cyp28c1	TRUE	FALSE	NA	NA	NA	NA	NA	NA	NA	NA	NA	NA	TRUE	FALSE	NA	NA	NA	NA	NA	NA	NA	NA	NA	NA	NA	0	3.18385	0	1.9346	0	2.55922	Inf	0	0.134673	0	0.0817333	0	0.108203	Inf
Cyp304a1	TRUE	FALSE	NA	NA	NA	NA	NA	NA	NA	NA	NA	NA	TRUE	FALSE	NA	NA	NA	NA	NA	NA	NA	NA	NA	NA	NA	0	6.09123	0	3.7012	0	4.89622	Inf	0	0.238629	0	0.144825	0	0.191727	Inf
Cyp308a1	TRUE	FALSE	NA	NA	NA	NA	NA	NA	NA	NA	NA	NA	TRUE	FALSE	NA	NA	NA	NA	NA	NA	NA	NA	NA	NA	NA	0	0	0	0.925301	0	0.46265	Inf	0	0	0	0.0393162	0	0.0196581	Inf
Cyp4ac3	TRUE	FALSE	NA	NA	NA	NA	NA	NA	NA	NA	NA	NA	TRUE	FALSE	NA	NA	NA	NA	NA	NA	NA	NA	NA	NA	NA	0	1.0152	0	3.7012	0	2.3582	Inf	0	0.0428808	0	0.156147	0	0.099514	Inf
Cyp6a21	TRUE	FALSE	NA	NA	NA	NA	NA	NA	NA	NA	NA	NA	TRUE	FALSE	NA	NA	NA	NA	NA	NA	NA	NA	NA	NA	NA	0	1.34296	0	2.34602	0	1.84449	Inf	0	0.0557344	0	0.0972463	0	0.0764904	Inf
Cyp6t3	TRUE	FALSE	NA	NA	NA	NA	NA	NA	NA	NA	NA	NA	TRUE	FALSE	NA	NA	NA	NA	NA	NA	NA	NA	NA	NA	NA	0	1.0152	0	1.8506	0	1.4329	Inf	0	0.0403567	0	0.0734779	0	0.0569173	Inf
cyr	TRUE	FALSE	NA	NA	NA	NA	NA	NA	NA	NA	NA	NA	TRUE	FALSE	NA	NA	NA	NA	NA	NA	NA	NA	NA	NA	NA	0	1.04968	0	5.79235	0	3.42102	Inf	0	0.0276885	0	0.152608	0	0.0901483	Inf
decay	TRUE	FALSE	NA	NA	NA	NA	NA	NA	NA	NA	NA	NA	TRUE	FALSE	NA	NA	NA	NA	NA	NA	NA	NA	NA	NA	NA	0	0	0	9.25301	0	4.6265	Inf	0	0	0	0.602246	0	0.301123	Inf
deltaTry	TRUE	FALSE	NA	NA	NA	NA	NA	NA	NA	NA	NA	NA	TRUE	FALSE	NA	NA	NA	NA	NA	NA	NA	NA	NA	NA	NA	0	0	0	101.547	0	50.7736	Inf	0	0	0	9.8654	0	4.9327	Inf
Dfd	TRUE	FALSE	NA	NA	NA	NA	NA	NA	NA	NA	NA	NA	TRUE	FALSE	NA	NA	NA	NA	NA	NA	NA	NA	NA	NA	NA	0	1.0152	0	0.925301	0	0.970253	Inf	0	0.0237532	0	0.0216239	0	0.0226886	Inf
Dh31-R	TRUE	FALSE	NA	NA	NA	NA	NA	NA	NA	NA	NA	NA	TRUE	FALSE	NA	NA	NA	NA	NA	NA	NA	NA	NA	NA	NA	0	4.0608	0	8.32765	0	6.19422	Inf	0	0.0786096	0	0.161016	0	0.119813	Inf
Dh44	TRUE	FALSE	NA	NA	NA	NA	NA	NA	NA	NA	NA	NA	TRUE	FALSE	NA	NA	NA	NA	NA	NA	NA	NA	NA	NA	NA	0	0	0	3.87437	0	1.93718	Inf	0	0	0	0.13584	0	0.0679202	Inf
Dhc16F	TRUE	FALSE	NA	NA	NA	NA	NA	NA	NA	NA	NA	NA	TRUE	FALSE	NA	NA	NA	NA	NA	NA	NA	NA	NA	NA	NA	0	0	0	1.8506	0	0.925301	Inf	0	0	0	0.00897239	0	0.0044862	Inf
Dhc93AB	TRUE	FALSE	NA	NA	NA	NA	NA	NA	NA	NA	NA	NA	TRUE	FALSE	NA	NA	NA	NA	NA	NA	NA	NA	NA	NA	NA	0	1.01617	0	0	0	0.508085	Inf	0	0.00437739	0	0	0	0.00218869	Inf
Diedel2	TRUE	FALSE	NA	NA	NA	NA	NA	NA	NA	NA	NA	NA	TRUE	FALSE	NA	NA	NA	NA	NA	NA	NA	NA	NA	NA	NA	0	0	0	2.7759	0	1.38795	Inf	0	0	0	0.92038	0	0.46019	Inf
Diedel3	TRUE	FALSE	NA	NA	NA	NA	NA	NA	NA	NA	NA	NA	TRUE	FALSE	NA	NA	NA	NA	NA	NA	NA	NA	NA	NA	NA	0	0	0	153.775	0	76.8874	Inf	0	0	0	6.39432	0	3.19716	Inf
dimm	TRUE	FALSE	NA	NA	NA	NA	NA	NA	NA	NA	NA	NA	TRUE	FALSE	NA	NA	NA	NA	NA	NA	NA	NA	NA	NA	NA	0	0.706507	0	0	0	0.353254	Inf	0	0.0195064	0	0	0	0.00975318	Inf
dmrt93B	TRUE	FALSE	NA	NA	NA	NA	NA	NA	NA	NA	NA	NA	TRUE	FALSE	NA	NA	NA	NA	NA	NA	NA	NA	NA	NA	NA	0	2.03041	0	0.925301	0	1.47786	Inf	0	0.1549	0	0.070507	0	0.112704	Inf
DMSAT6|Drosophila_fruit_fly_genus	FALSE	TRUE	NA	NA	NA	NA	NA	NA	NA	NA	NA	NA	FALSE	TRUE	NA	NA	NA	NA	NA	NA	NA	NA	NA	NA	NA	0	0	0	1.8506	0	0.925301	Inf	0	0	0	0.405356	0	0.202678	Inf
Doc1	TRUE	FALSE	NA	NA	NA	NA	NA	NA	NA	NA	NA	NA	TRUE	FALSE	NA	NA	NA	NA	NA	NA	NA	NA	NA	NA	NA	0	10.9847	0	4.00477	0	7.49473	Inf	0	0.52924	0	0.192719	0	0.360979	Inf
Doc3	TRUE	FALSE	NA	NA	NA	NA	NA	NA	NA	NA	NA	NA	TRUE	FALSE	NA	NA	NA	NA	NA	NA	NA	NA	NA	NA	NA	0	2.03041	0	0.925301	0	1.47786	Inf	0	0.0819746	0	0.037313	0	0.0596438	Inf
dpr10	TRUE	FALSE	NA	NA	NA	NA	NA	NA	NA	NA	NA	NA	TRUE	FALSE	NA	NA	NA	NA	NA	NA	NA	NA	NA	NA	NA	0	2.09535	0	0	0	1.04767	Inf	0	0.038787	0	0	0	0.0193935	Inf
dpr11	TRUE	FALSE	NA	NA	NA	NA	NA	NA	NA	NA	NA	NA	TRUE	FALSE	NA	NA	NA	NA	NA	NA	NA	NA	NA	NA	NA	0	2.37656	0	1.08305	0	1.7298	Inf	0	0.0363453	0	0.0165436	0	0.0264444	Inf
dpr15	TRUE	FALSE	NA	NA	NA	NA	NA	NA	NA	NA	NA	NA	TRUE	FALSE	NA	NA	NA	NA	NA	NA	NA	NA	NA	NA	NA	0	2.03535	0	0	0	1.01767	Inf	0	0.0368443	0	0	0	0.0184221	Inf
dpr16	TRUE	FALSE	NA	NA	NA	NA	NA	NA	NA	NA	NA	NA	TRUE	FALSE	NA	NA	NA	NA	NA	NA	NA	NA	NA	NA	NA	0	1.51469	0	0	0	0.757344	Inf	0	0.0344762	0	0	0	0.0172381	Inf
dpr3	TRUE	FALSE	NA	NA	NA	NA	NA	NA	NA	NA	NA	NA	TRUE	FALSE	NA	NA	NA	NA	NA	NA	NA	NA	NA	NA	NA	0	0	0	1.02368	0	0.511838	Inf	0	0	0	0.0217092	0	0.0108546	Inf
Drep-3	TRUE	FALSE	NA	NA	NA	NA	NA	NA	NA	NA	NA	NA	TRUE	FALSE	NA	NA	NA	NA	NA	NA	NA	NA	NA	NA	NA	0	2.21044	0	0	0	1.10522	Inf	0	0.0887908	0	0	0	0.0443954	Inf
drm	TRUE	FALSE	NA	NA	NA	NA	NA	NA	NA	NA	NA	NA	TRUE	FALSE	NA	NA	NA	NA	NA	NA	NA	NA	NA	NA	NA	0	1.35213	0	3.69716	0	2.52464	Inf	0	0.0377083	0	0.102984	0	0.0703461	Inf
Drsl3	TRUE	FALSE	NA	NA	NA	NA	NA	NA	NA	NA	NA	NA	TRUE	FALSE	NA	NA	NA	NA	NA	NA	NA	NA	NA	NA	NA	0	1.0152	0	0	0	0.507602	Inf	0	0.374486	0	0	0	0.187243	Inf
Drsl5	TRUE	FALSE	NA	NA	NA	NA	NA	NA	NA	NA	NA	NA	TRUE	FALSE	NA	NA	NA	NA	NA	NA	NA	NA	NA	NA	NA	0	1.0152	0	0	0	0.507602	Inf	0	0.365472	0	0	0	0.182736	Inf
Dsk	TRUE	FALSE	NA	NA	NA	NA	NA	NA	NA	NA	NA	NA	TRUE	FALSE	NA	NA	NA	NA	NA	NA	NA	NA	NA	NA	NA	0	2.03041	0	0.925301	0	1.47786	Inf	0	0.32613	0	0.148447	0	0.237289	Inf
E(spl)m5-HLH	TRUE	FALSE	NA	NA	NA	NA	NA	NA	NA	NA	NA	NA	TRUE	FALSE	NA	NA	NA	NA	NA	NA	NA	NA	NA	NA	NA	0	0	0	0.925301	0	0.46265	Inf	0	0	0	0.0804173	0	0.0402086	Inf
E(spl)m6-BFM	TRUE	FALSE	NA	NA	NA	NA	NA	NA	NA	NA	NA	NA	TRUE	FALSE	NA	NA	NA	NA	NA	NA	NA	NA	NA	NA	NA	0	1.0152	0	1.8506	0	1.4329	Inf	0	0.0643214	0	0.117111	0	0.090716	Inf
E(spl)m8-HLH	TRUE	FALSE	NA	NA	NA	NA	NA	NA	NA	NA	NA	NA	TRUE	FALSE	NA	NA	NA	NA	NA	NA	NA	NA	NA	NA	NA	0	1.0152	0	0	0	0.507602	Inf	0	0.105849	0	0	0	0.0529243	Inf
E(spl)mdelta-HLH	TRUE	FALSE	NA	NA	NA	NA	NA	NA	NA	NA	NA	NA	TRUE	FALSE	NA	NA	NA	NA	NA	NA	NA	NA	NA	NA	NA	0	1.0152	0	0.925301	0	0.970253	Inf	0	0.0741198	0	0.0674753	0	0.0707976	Inf
Edg78E	TRUE	FALSE	NA	NA	NA	NA	NA	NA	NA	NA	NA	NA	TRUE	FALSE	NA	NA	NA	NA	NA	NA	NA	NA	NA	NA	NA	0	1.63107	0	0	0	0.815534	Inf	0	0.173874	0	0	0	0.0869369	Inf
eIF4E-3	TRUE	FALSE	NA	NA	NA	NA	NA	NA	NA	NA	NA	NA	TRUE	FALSE	NA	NA	NA	NA	NA	NA	NA	NA	NA	NA	NA	0	1.0152	0	2.7759	0	1.89555	Inf	0	0.0717402	0	0.195927	0	0.133834	Inf
Eig71Ee	TRUE	FALSE	NA	NA	NA	NA	NA	NA	NA	NA	NA	NA	TRUE	FALSE	NA	NA	NA	NA	NA	NA	NA	NA	NA	NA	NA	0	0	0	0.925301	0	0.46265	Inf	0	0	0	0.0426766	0	0.0213383	Inf
Eip63F-2	FALSE	FALSE	NA	NA	NA	NA	NA	NA	NA	NA	NA	NA	FALSE	FALSE	NA	NA	NA	NA	NA	NA	NA	NA	NA	NA	NA	0	0	0	0.925301	0	0.46265	Inf	0	0	0	0.0510454	0	0.0255227	Inf
Ela	TRUE	FALSE	NA	NA	NA	NA	NA	NA	NA	NA	NA	NA	TRUE	FALSE	NA	NA	NA	NA	NA	NA	NA	NA	NA	NA	NA	0	2.16169	0	1.8506	0	2.00614	Inf	0	0.130029	0	0.111184	0	0.120606	Inf
elfless	TRUE	FALSE	NA	NA	NA	NA	NA	NA	NA	NA	NA	NA	TRUE	FALSE	NA	NA	NA	NA	NA	NA	NA	NA	NA	NA	NA	0	3.68539	0	2.51926	0	3.10233	Inf	0	0.167128	0	0.11411	0	0.140619	Inf
Elo68alpha	TRUE	FALSE	NA	NA	NA	NA	NA	NA	NA	NA	NA	NA	TRUE	FALSE	NA	NA	NA	NA	NA	NA	NA	NA	NA	NA	NA	0	3.04561	0	0	0	1.52281	Inf	0	0.245259	0	0	0	0.122629	Inf
Elo68beta	TRUE	FALSE	NA	NA	NA	NA	NA	NA	NA	NA	NA	NA	TRUE	FALSE	NA	NA	NA	NA	NA	NA	NA	NA	NA	NA	NA	0	0	0	1.8506	0	0.925301	Inf	0	0	0	0.171373	0	0.0856865	Inf
Erk7	TRUE	FALSE	NA	NA	NA	NA	NA	NA	NA	NA	NA	NA	TRUE	FALSE	NA	NA	NA	NA	NA	NA	NA	NA	NA	NA	NA	0	2.03041	0	4.55503	0	3.29272	Inf	0	0.0350672	0	0.078576	0	0.0568216	Inf
erm	TRUE	FALSE	NA	NA	NA	NA	NA	NA	NA	NA	NA	NA	TRUE	FALSE	NA	NA	NA	NA	NA	NA	NA	NA	NA	NA	NA	0	1.0152	0	0	0	0.507602	Inf	0	0.0224956	0	0	0	0.0112478	Inf
Est-P	TRUE	FALSE	NA	NA	NA	NA	NA	NA	NA	NA	NA	NA	TRUE	FALSE	NA	NA	NA	NA	NA	NA	NA	NA	NA	NA	NA	0	1.0152	0	1.8506	0	1.4329	Inf	0	0.0391521	0	0.0712845	0	0.0552183	Inf
etaTry	TRUE	FALSE	NA	NA	NA	NA	NA	NA	NA	NA	NA	NA	TRUE	FALSE	NA	NA	NA	NA	NA	NA	NA	NA	NA	NA	NA	0	0	0	0.925301	0	0.46265	Inf	0	0	0	0.0771418	0	0.0385709	Inf
Ets65A	TRUE	FALSE	NA	NA	NA	NA	NA	NA	NA	NA	NA	NA	TRUE	FALSE	NA	NA	NA	NA	NA	NA	NA	NA	NA	NA	NA	0	0	0	1.39614	0	0.69807	Inf	0	0	0	0.0277678	0	0.0138839	Inf
eys	TRUE	FALSE	NA	NA	NA	NA	NA	NA	NA	NA	NA	NA	TRUE	FALSE	NA	NA	NA	NA	NA	NA	NA	NA	NA	NA	NA	0	0	0	0.9732	0	0.4866	Inf	0	0	0	0.00731839	0	0.0036592	Inf
Fbp1	TRUE	FALSE	NA	NA	NA	NA	NA	NA	NA	NA	NA	NA	TRUE	FALSE	NA	NA	NA	NA	NA	NA	NA	NA	NA	NA	NA	0	15.2566	0	2.78062	0	9.01862	Inf	0	0.282812	0	0.0514827	0	0.167147	Inf
Fife	TRUE	FALSE	NA	NA	NA	NA	NA	NA	NA	NA	NA	NA	TRUE	FALSE	NA	NA	NA	NA	NA	NA	NA	NA	NA	NA	NA	0	1.20825	0	1.10124	0	1.15475	Inf	0	0.0122452	0	0.0111474	0	0.0116963	Inf
fkh	TRUE	FALSE	NA	NA	NA	NA	NA	NA	NA	NA	NA	NA	TRUE	FALSE	NA	NA	NA	NA	NA	NA	NA	NA	NA	NA	NA	0	1.26233	0	3.7012	0	2.48177	Inf	0	0.0195823	0	0.0573475	0	0.0384649	Inf
fne	TRUE	FALSE	NA	NA	NA	NA	NA	NA	NA	NA	NA	NA	TRUE	FALSE	NA	NA	NA	NA	NA	NA	NA	NA	NA	NA	NA	0	6.06231	0	0	0	3.03116	Inf	0	0.050587	0	0	0	0.0252935	Inf
FoxP	TRUE	FALSE	NA	NA	NA	NA	NA	NA	NA	NA	NA	NA	TRUE	FALSE	NA	NA	NA	NA	NA	NA	NA	NA	NA	NA	NA	0	0	0	1.69629	0	0.848143	Inf	0	0	0	0.0347624	0	0.0173812	Inf
Fst	TRUE	FALSE	NA	NA	NA	NA	NA	NA	NA	NA	NA	NA	TRUE	FALSE	NA	NA	NA	NA	NA	NA	NA	NA	NA	NA	NA	0	4.06082	0	12.0289	0	8.04487	Inf	0	0.246763	0	0.730085	0	0.488424	Inf
fusl	TRUE	FALSE	NA	NA	NA	NA	NA	NA	NA	NA	NA	NA	TRUE	FALSE	NA	NA	NA	NA	NA	NA	NA	NA	NA	NA	NA	0	7.3999	0	9.25197	0	8.32594	Inf	0	0.177507	0	0.221669	0	0.199588	Inf
gammaSnap2	TRUE	FALSE	NA	NA	NA	NA	NA	NA	NA	NA	NA	NA	TRUE	FALSE	NA	NA	NA	NA	NA	NA	NA	NA	NA	NA	NA	0	4.06082	0	0	0	2.03041	Inf	0	0.300541	0	0	0	0.15027	Inf
gammaTry	TRUE	FALSE	NA	NA	NA	NA	NA	NA	NA	NA	NA	NA	TRUE	FALSE	NA	NA	NA	NA	NA	NA	NA	NA	NA	NA	NA	0	0	0	100.027	0	50.0136	Inf	0	0	0	9.71772	0	4.85886	Inf
Gas8	TRUE	FALSE	NA	NA	NA	NA	NA	NA	NA	NA	NA	NA	TRUE	FALSE	NA	NA	NA	NA	NA	NA	NA	NA	NA	NA	NA	0	0	0	0.984339	0	0.492169	Inf	0	0	0	0.0336961	0	0.0168481	Inf
gcm	TRUE	FALSE	NA	NA	NA	NA	NA	NA	NA	NA	NA	NA	TRUE	FALSE	NA	NA	NA	NA	NA	NA	NA	NA	NA	NA	NA	0	1.09289	0	0	0	0.546444	Inf	0	0.0352414	0	0	0	0.0176207	Inf
gl	TRUE	FALSE	NA	NA	NA	NA	NA	NA	NA	NA	NA	NA	TRUE	FALSE	NA	NA	NA	NA	NA	NA	NA	NA	NA	NA	NA	0	1.0152	0	0	0	0.507602	Inf	0	0.0215168	0	0	0	0.0107584	Inf
glob3	TRUE	FALSE	NA	NA	NA	NA	NA	NA	NA	NA	NA	NA	TRUE	FALSE	NA	NA	NA	NA	NA	NA	NA	NA	NA	NA	NA	0	1.0152	0	0	0	0.507602	Inf	0	0.0656512	0	0	0	0.0328256	Inf
GluClalpha	TRUE	FALSE	NA	NA	NA	NA	NA	NA	NA	NA	NA	NA	TRUE	FALSE	NA	NA	NA	NA	NA	NA	NA	NA	NA	NA	NA	0	1.02689	0	0	0	0.513444	Inf	0	0.0259802	0	0	0	0.0129901	Inf
GluRIIB	TRUE	FALSE	NA	NA	NA	NA	NA	NA	NA	NA	NA	NA	TRUE	FALSE	NA	NA	NA	NA	NA	NA	NA	NA	NA	NA	NA	0	0	0	0.925301	0	0.46265	Inf	0	0	0	0.0199726	0	0.00998629	Inf
Gpa2	TRUE	FALSE	NA	NA	NA	NA	NA	NA	NA	NA	NA	NA	TRUE	FALSE	NA	NA	NA	NA	NA	NA	NA	NA	NA	NA	NA	0	1.0152	0	0	0	0.507602	Inf	0	0.265791	0	0	0	0.132896	Inf
Gpb5	TRUE	FALSE	NA	NA	NA	NA	NA	NA	NA	NA	NA	NA	TRUE	FALSE	NA	NA	NA	NA	NA	NA	NA	NA	NA	NA	NA	0	2.20774	0	0.925301	0	1.56652	Inf	0	0.263467	0	0.110292	0	0.186879	Inf
Gr10a	TRUE	FALSE	NA	NA	NA	NA	NA	NA	NA	NA	NA	NA	TRUE	FALSE	NA	NA	NA	NA	NA	NA	NA	NA	NA	NA	NA	0	2.03041	0	0.925301	0	1.47786	Inf	0	0.0910692	0	0.0414526	0	0.0662609	Inf
Gr22d	TRUE	FALSE	NA	NA	NA	NA	NA	NA	NA	NA	NA	NA	TRUE	FALSE	NA	NA	NA	NA	NA	NA	NA	NA	NA	NA	NA	0	1.0152	0	0	0	0.507602	Inf	0	0.0625866	0	0	0	0.0312933	Inf
Gr2a	TRUE	FALSE	NA	NA	NA	NA	NA	NA	NA	NA	NA	NA	TRUE	FALSE	NA	NA	NA	NA	NA	NA	NA	NA	NA	NA	NA	0	1.03615	0	0	0	0.518073	Inf	0	0.0460912	0	0	0	0.0230456	Inf
Gr98b	TRUE	FALSE	NA	NA	NA	NA	NA	NA	NA	NA	NA	NA	TRUE	FALSE	NA	NA	NA	NA	NA	NA	NA	NA	NA	NA	NA	0	1.0152	0	1.8506	0	1.4329	Inf	0	0.0595592	0	0.10844	0	0.0839996	Inf
Gr98d	TRUE	FALSE	NA	NA	NA	NA	NA	NA	NA	NA	NA	NA	TRUE	FALSE	NA	NA	NA	NA	NA	NA	NA	NA	NA	NA	NA	0	1.0152	0	0	0	0.507602	Inf	0	0.0580129	0	0	0	0.0290065	Inf
Grd	TRUE	FALSE	NA	NA	NA	NA	NA	NA	NA	NA	NA	NA	TRUE	FALSE	NA	NA	NA	NA	NA	NA	NA	NA	NA	NA	NA	0	0	0	0.925301	0	0.46265	Inf	0	0	0	0.0141851	0	0.00709253	Inf
GstD11	TRUE	FALSE	NA	NA	NA	NA	NA	NA	NA	NA	NA	NA	TRUE	FALSE	NA	NA	NA	NA	NA	NA	NA	NA	NA	NA	NA	0	0	0	1.07856	0	0.539278	Inf	0	0	0	0.0858204	0	0.0429102	Inf
GstZ2	TRUE	FALSE	NA	NA	NA	NA	NA	NA	NA	NA	NA	NA	TRUE	FALSE	NA	NA	NA	NA	NA	NA	NA	NA	NA	NA	NA	0	1.05167	0	0	0	0.525836	Inf	0	0.0699114	0	0	0	0.0349557	Inf
gudu	TRUE	FALSE	NA	NA	NA	NA	NA	NA	NA	NA	NA	NA	TRUE	FALSE	NA	NA	NA	NA	NA	NA	NA	NA	NA	NA	NA	0	1.0152	0	0	0	0.507602	Inf	0	0.0293878	0	0	0	0.0146939	Inf
Gyc-89Da	TRUE	FALSE	NA	NA	NA	NA	NA	NA	NA	NA	NA	NA	TRUE	FALSE	NA	NA	NA	NA	NA	NA	NA	NA	NA	NA	NA	0	2.06221	0	2.81938	0	2.4408	Inf	0	0.0581525	0	0.0794091	0	0.0687808	Inf
Gycalpha99B	TRUE	FALSE	NA	NA	NA	NA	NA	NA	NA	NA	NA	NA	TRUE	FALSE	NA	NA	NA	NA	NA	NA	NA	NA	NA	NA	NA	0	1.0152	0	0	0	0.507602	Inf	0	0.0279969	0	0	0	0.0139984	Inf
Gycbeta100B	TRUE	FALSE	NA	NA	NA	NA	NA	NA	NA	NA	NA	NA	TRUE	FALSE	NA	NA	NA	NA	NA	NA	NA	NA	NA	NA	NA	0	2.03041	0	0	0	1.0152	Inf	0	0.0312041	0	0	0	0.0156021	Inf
Gypsy7_LTR|Drosophila_fruit_fly_genus	FALSE	TRUE	NA	NA	NA	NA	NA	NA	NA	NA	NA	NA	FALSE	TRUE	NA	NA	NA	NA	NA	NA	NA	NA	NA	NA	NA	0	0	0	0.925301	0	0.46265	Inf	0	0	0	0.834414	0	0.417207	Inf
Gypsy9_LTR|Drosophila_fruit_fly_genus	FALSE	TRUE	NA	NA	NA	NA	NA	NA	NA	NA	NA	NA	FALSE	TRUE	NA	NA	NA	NA	NA	NA	NA	NA	NA	NA	NA	0	5.07602	0	0	0	2.53801	Inf	0	2.19432	0	0	0	1.09716	Inf
hale	TRUE	FALSE	NA	NA	NA	NA	NA	NA	NA	NA	NA	NA	TRUE	FALSE	NA	NA	NA	NA	NA	NA	NA	NA	NA	NA	NA	0	1.0152	0	0	0	0.507602	Inf	0	0.0509143	0	0	0	0.0254571	Inf
hbn	TRUE	FALSE	NA	NA	NA	NA	NA	NA	NA	NA	NA	NA	TRUE	FALSE	NA	NA	NA	NA	NA	NA	NA	NA	NA	NA	NA	0	1.0152	0	0	0	0.507602	Inf	0	0.0377319	0	0	0	0.018866	Inf
Helitron1_DM|Drosophila_fruit_fly_genus	FALSE	TRUE	NA	NA	NA	NA	NA	NA	NA	NA	NA	NA	FALSE	TRUE	NA	NA	NA	NA	NA	NA	NA	NA	NA	NA	NA	0	2.03041	0	0	0	1.0152	Inf	0	0.330598	0	0	0	0.165299	Inf
Hex-t2	TRUE	FALSE	NA	NA	NA	NA	NA	NA	NA	NA	NA	NA	TRUE	FALSE	NA	NA	NA	NA	NA	NA	NA	NA	NA	NA	NA	0	0	0	0.925301	0	0.46265	Inf	0	0	0	0.0400911	0	0.0200455	Inf
hgo	TRUE	FALSE	NA	NA	NA	NA	NA	NA	NA	NA	NA	NA	TRUE	FALSE	NA	NA	NA	NA	NA	NA	NA	NA	NA	NA	NA	0	1.0152	0	2.7759	0	1.89555	Inf	0	0.0484217	0	0.132243	0	0.0903321	Inf
hig	TRUE	FALSE	NA	NA	NA	NA	NA	NA	NA	NA	NA	NA	TRUE	FALSE	NA	NA	NA	NA	NA	NA	NA	NA	NA	NA	NA	0	0	0	0.898965	0	0.449482	Inf	0	0	0	0.0135349	0	0.00676744	Inf
Him	TRUE	FALSE	NA	NA	NA	NA	NA	NA	NA	NA	NA	NA	TRUE	FALSE	NA	NA	NA	NA	NA	NA	NA	NA	NA	NA	NA	0	1.0152	0	0	0	0.507602	Inf	0	0.0836805	0	0	0	0.0418402	Inf
His4:CG33869	TRUE	FALSE	NA	NA	NA	NA	NA	NA	NA	NA	NA	NA	TRUE	FALSE	NA	NA	NA	NA	NA	NA	NA	NA	NA	NA	NA	0	7.82705	0	3.78376	0	5.80541	Inf	0	1.42253	0	0.68686	0	1.05469	Inf
HisCl1	TRUE	FALSE	NA	NA	NA	NA	NA	NA	NA	NA	NA	NA	TRUE	FALSE	NA	NA	NA	NA	NA	NA	NA	NA	NA	NA	NA	0	1.02608	0	0	0	0.513039	Inf	0	0.0403837	0	0	0	0.0201919	Inf
HLH3B	TRUE	FALSE	NA	NA	NA	NA	NA	NA	NA	NA	NA	NA	TRUE	FALSE	NA	NA	NA	NA	NA	NA	NA	NA	NA	NA	NA	0	1.0152	0	0	0	0.507602	Inf	0	0.0490914	0	0	0	0.0245457	Inf
HLH4C	TRUE	FALSE	NA	NA	NA	NA	NA	NA	NA	NA	NA	NA	TRUE	FALSE	NA	NA	NA	NA	NA	NA	NA	NA	NA	NA	NA	0	1.0152	0	0	0	0.507602	Inf	0	0.0492517	0	0	0	0.0246259	Inf
Hr83	TRUE	FALSE	NA	NA	NA	NA	NA	NA	NA	NA	NA	NA	TRUE	FALSE	NA	NA	NA	NA	NA	NA	NA	NA	NA	NA	NA	0	0	0	0.925301	0	0.46265	Inf	0	0	0	0.0860894	0	0.0430447	Inf
Hs3st-B	TRUE	FALSE	NA	NA	NA	NA	NA	NA	NA	NA	NA	NA	TRUE	FALSE	NA	NA	NA	NA	NA	NA	NA	NA	NA	NA	NA	0	3.18478	0	0.967582	0	2.07618	Inf	0	0.0956153	0	0.0290146	0	0.062315	Inf
Hsp60B	TRUE	FALSE	NA	NA	NA	NA	NA	NA	NA	NA	NA	NA	TRUE	FALSE	NA	NA	NA	NA	NA	NA	NA	NA	NA	NA	NA	0	3.04561	0	1.8506	0	2.44811	Inf	0	0.0903193	0	0.054815	0	0.0725671	Inf
hydra	TRUE	FALSE	NA	NA	NA	NA	NA	NA	NA	NA	NA	NA	TRUE	FALSE	NA	NA	NA	NA	NA	NA	NA	NA	NA	NA	NA	0	1.03934	0	0	0	0.519669	Inf	0	0.0486167	0	0	0	0.0243084	Inf
IM1	TRUE	FALSE	NA	NA	NA	NA	NA	NA	NA	NA	NA	NA	TRUE	FALSE	NA	NA	NA	NA	NA	NA	NA	NA	NA	NA	NA	0	1.0152	0	0	0	0.507602	Inf	0	0.372192	0	0	0	0.186096	Inf
in	TRUE	FALSE	NA	NA	NA	NA	NA	NA	NA	NA	NA	NA	TRUE	FALSE	NA	NA	NA	NA	NA	NA	NA	NA	NA	NA	NA	0	2.03041	0	0	0	1.0152	Inf	0	0.0421468	0	0	0	0.0210734	Inf
ind	TRUE	FALSE	NA	NA	NA	NA	NA	NA	NA	NA	NA	NA	TRUE	FALSE	NA	NA	NA	NA	NA	NA	NA	NA	NA	NA	NA	0	0	0	0.925301	0	0.46265	Inf	0	0	0	0.0592501	0	0.0296251	Inf
Indy-2	TRUE	FALSE	NA	NA	NA	NA	NA	NA	NA	NA	NA	NA	TRUE	FALSE	NA	NA	NA	NA	NA	NA	NA	NA	NA	NA	NA	0	1.69232	0	0	0	0.846159	Inf	0	0.0364332	0	0	0	0.0182166	Inf
Invader5_LTR|Drosophila_fruit_fly_genus	FALSE	TRUE	NA	NA	NA	NA	NA	NA	NA	NA	NA	NA	FALSE	TRUE	NA	NA	NA	NA	NA	NA	NA	NA	NA	NA	NA	0	2.03041	0	0.925301	0	1.47786	Inf	0	0.787719	0	0.358552	0	0.573135	Inf
iotaTry	TRUE	FALSE	NA	NA	NA	NA	NA	NA	NA	NA	NA	NA	TRUE	FALSE	NA	NA	NA	NA	NA	NA	NA	NA	NA	NA	NA	0	0	0	1.8506	0	0.925301	Inf	0	0	0	0.177464	0	0.0887319	Inf
Ir100a	TRUE	FALSE	NA	NA	NA	NA	NA	NA	NA	NA	NA	NA	TRUE	FALSE	NA	NA	NA	NA	NA	NA	NA	NA	NA	NA	NA	0	5.07602	0	2.7759	0	3.92596	Inf	0	0.187022	0	0.102154	0	0.144588	Inf
Ir10a	TRUE	FALSE	NA	NA	NA	NA	NA	NA	NA	NA	NA	NA	TRUE	FALSE	NA	NA	NA	NA	NA	NA	NA	NA	NA	NA	NA	0	0	0	0.925301	0	0.46265	Inf	0	0	0	0.0343279	0	0.017164	Inf
Ir52b	TRUE	FALSE	NA	NA	NA	NA	NA	NA	NA	NA	NA	NA	TRUE	FALSE	NA	NA	NA	NA	NA	NA	NA	NA	NA	NA	NA	0	0	0	0.925301	0	0.46265	Inf	0	0	0	0.0345004	0	0.0172502	Inf
Ir60e	TRUE	FALSE	NA	NA	NA	NA	NA	NA	NA	NA	NA	NA	TRUE	FALSE	NA	NA	NA	NA	NA	NA	NA	NA	NA	NA	NA	0	0	0	0.925301	0	0.46265	Inf	0	0	0	0.0361347	0	0.0180673	Inf
Ir64a	TRUE	FALSE	NA	NA	NA	NA	NA	NA	NA	NA	NA	NA	TRUE	FALSE	NA	NA	NA	NA	NA	NA	NA	NA	NA	NA	NA	0	1.0152	0	0	0	0.507602	Inf	0	0.0253394	0	0	0	0.0126697	Inf
Ir7f	TRUE	FALSE	NA	NA	NA	NA	NA	NA	NA	NA	NA	NA	TRUE	FALSE	NA	NA	NA	NA	NA	NA	NA	NA	NA	NA	NA	0	3.04561	0	2.7759	0	2.91076	Inf	0	0.101457	0	0.0923621	0	0.0969097	Inf
Ir7g	TRUE	FALSE	NA	NA	NA	NA	NA	NA	NA	NA	NA	NA	TRUE	FALSE	NA	NA	NA	NA	NA	NA	NA	NA	NA	NA	NA	0	2.03041	0	0	0	1.0152	Inf	0	0.0811477	0	0	0	0.0405739	Inf
Ir84a	TRUE	FALSE	NA	NA	NA	NA	NA	NA	NA	NA	NA	NA	TRUE	FALSE	NA	NA	NA	NA	NA	NA	NA	NA	NA	NA	NA	0	0	0	0.925301	0	0.46265	Inf	0	0	0	0.0316386	0	0.0158193	Inf
Ir92a	TRUE	FALSE	NA	NA	NA	NA	NA	NA	NA	NA	NA	NA	TRUE	FALSE	NA	NA	NA	NA	NA	NA	NA	NA	NA	NA	NA	0	1.0152	0	0	0	0.507602	Inf	0	0.0328255	0	0	0	0.0164128	Inf
jb	TRUE	FALSE	NA	NA	NA	NA	NA	NA	NA	NA	NA	NA	TRUE	FALSE	NA	NA	NA	NA	NA	NA	NA	NA	NA	NA	NA	0	1.0152	0	0	0	0.507602	Inf	0	0.153913	0	0	0	0.0769567	Inf
Jon25Bi	TRUE	FALSE	NA	NA	NA	NA	NA	NA	NA	NA	NA	NA	TRUE	FALSE	NA	NA	NA	NA	NA	NA	NA	NA	NA	NA	NA	0	1.0152	0	490.409	0	245.712	Inf	0	0.0904552	0	43.6436	0	21.867	Inf
Jon25Bii	TRUE	FALSE	NA	NA	NA	NA	NA	NA	NA	NA	NA	NA	TRUE	FALSE	NA	NA	NA	NA	NA	NA	NA	NA	NA	NA	NA	0	2.04523	0	324.355	0	163.2	Inf	0	0.176157	0	27.9035	0	14.0398	Inf
Jon25Biii	TRUE	FALSE	NA	NA	NA	NA	NA	NA	NA	NA	NA	NA	TRUE	FALSE	NA	NA	NA	NA	NA	NA	NA	NA	NA	NA	NA	0	0	0	61.9952	0	30.9976	Inf	0	0	0	5.85984	0	2.92992	Inf
Jon44E	TRUE	FALSE	NA	NA	NA	NA	NA	NA	NA	NA	NA	NA	TRUE	FALSE	NA	NA	NA	NA	NA	NA	NA	NA	NA	NA	NA	0	0	0	1.25332	0	0.626659	Inf	0	0	0	0.0783523	0	0.0391762	Inf
Jon65Ai	TRUE	FALSE	NA	NA	NA	NA	NA	NA	NA	NA	NA	NA	TRUE	FALSE	NA	NA	NA	NA	NA	NA	NA	NA	NA	NA	NA	0	1.08509	0	0	0	0.542544	Inf	0	0.0912763	0	0	0	0.0456382	Inf
Jon65Aii	TRUE	FALSE	NA	NA	NA	NA	NA	NA	NA	NA	NA	NA	TRUE	FALSE	NA	NA	NA	NA	NA	NA	NA	NA	NA	NA	NA	0	0	0	1.8506	0	0.925301	Inf	0	0	0	0.173265	0	0.0866326	Inf
Jon65Aiii	TRUE	FALSE	NA	NA	NA	NA	NA	NA	NA	NA	NA	NA	TRUE	FALSE	NA	NA	NA	NA	NA	NA	NA	NA	NA	NA	NA	0	0	0	632.906	0	316.453	Inf	0	0	0	55.575	0	27.7875	Inf
Jon65Aiv	TRUE	FALSE	NA	NA	NA	NA	NA	NA	NA	NA	NA	NA	TRUE	FALSE	NA	NA	NA	NA	NA	NA	NA	NA	NA	NA	NA	0	0	0	968.79	0	484.395	Inf	0	0	0	81.5694	0	40.7847	Inf
Jon99Fi	TRUE	FALSE	NA	NA	NA	NA	NA	NA	NA	NA	NA	NA	TRUE	FALSE	NA	NA	NA	NA	NA	NA	NA	NA	NA	NA	NA	0	1.0152	0	5.39342	0	3.20431	Inf	0	0.0821984	0	0.436169	0	0.259184	Inf
Jon99Fii	TRUE	FALSE	NA	NA	NA	NA	NA	NA	NA	NA	NA	NA	TRUE	FALSE	NA	NA	NA	NA	NA	NA	NA	NA	NA	NA	NA	0	0	0	1.98934	0	0.994668	Inf	0	0	0	0.165385	0	0.0826926	Inf
kappaTry	TRUE	FALSE	NA	NA	NA	NA	NA	NA	NA	NA	NA	NA	TRUE	FALSE	NA	NA	NA	NA	NA	NA	NA	NA	NA	NA	NA	0	0	0	3.7012	0	1.8506	Inf	0	0	0	0.297696	0	0.148848	Inf
karr	TRUE	FALSE	NA	NA	NA	NA	NA	NA	NA	NA	NA	NA	TRUE	FALSE	NA	NA	NA	NA	NA	NA	NA	NA	NA	NA	NA	0	1.0152	0	0	0	0.507602	Inf	0	0.225972	0	0	0	0.112986	Inf
Kaz-m1	TRUE	FALSE	NA	NA	NA	NA	NA	NA	NA	NA	NA	NA	TRUE	FALSE	NA	NA	NA	NA	NA	NA	NA	NA	NA	NA	NA	0	0	0	15.5357	0	7.76787	Inf	0	0	0	0.932913	0	0.466456	Inf
kek3	TRUE	FALSE	NA	NA	NA	NA	NA	NA	NA	NA	NA	NA	TRUE	FALSE	NA	NA	NA	NA	NA	NA	NA	NA	NA	NA	NA	0	1.05606	0	0	0	0.528031	Inf	0	0.0144962	0	0	0	0.0072481	Inf
kek4	TRUE	FALSE	NA	NA	NA	NA	NA	NA	NA	NA	NA	NA	TRUE	FALSE	NA	NA	NA	NA	NA	NA	NA	NA	NA	NA	NA	0	3.0737	0	0.933834	0	2.00377	Inf	0	0.0794904	0	0.0241215	0	0.051806	Inf
klg	TRUE	FALSE	NA	NA	NA	NA	NA	NA	NA	NA	NA	NA	TRUE	FALSE	NA	NA	NA	NA	NA	NA	NA	NA	NA	NA	NA	0	0	0	1.8506	0	0.925301	Inf	0	0	0	0.02851	0	0.014255	Inf
l(1)sc	TRUE	FALSE	NA	NA	NA	NA	NA	NA	NA	NA	NA	NA	TRUE	FALSE	NA	NA	NA	NA	NA	NA	NA	NA	NA	NA	NA	0	0	0	0.925301	0	0.46265	Inf	0	0	0	0.0611636	0	0.0305818	Inf
lbe	TRUE	FALSE	NA	NA	NA	NA	NA	NA	NA	NA	NA	NA	TRUE	FALSE	NA	NA	NA	NA	NA	NA	NA	NA	NA	NA	NA	0	1.0152	0	0	0	0.507602	Inf	0	0.0290343	0	0	0	0.0145171	Inf
Lcp2	TRUE	FALSE	NA	NA	NA	NA	NA	NA	NA	NA	NA	NA	TRUE	FALSE	NA	NA	NA	NA	NA	NA	NA	NA	NA	NA	NA	0	0	0	2.03807	0	1.01904	Inf	0	0	0	0.226339	0	0.11317	Inf
Lcp3	TRUE	FALSE	NA	NA	NA	NA	NA	NA	NA	NA	NA	NA	TRUE	FALSE	NA	NA	NA	NA	NA	NA	NA	NA	NA	NA	NA	0	1.36601	0	0	0	0.683004	Inf	0	0.192147	0	0	0	0.0960737	Inf
Lcp65Ag1	TRUE	FALSE	NA	NA	NA	NA	NA	NA	NA	NA	NA	NA	TRUE	FALSE	NA	NA	NA	NA	NA	NA	NA	NA	NA	NA	NA	0	1.0152	0	0	0	0.507602	Inf	0	0.18973	0	0	0	0.0948652	Inf
lcs	TRUE	FALSE	NA	NA	NA	NA	NA	NA	NA	NA	NA	NA	TRUE	FALSE	NA	NA	NA	NA	NA	NA	NA	NA	NA	NA	NA	0	0	0	125.841	0	62.9205	Inf	0	0	0	19.1045	0	9.55224	Inf
lectin-21Ca	TRUE	FALSE	NA	NA	NA	NA	NA	NA	NA	NA	NA	NA	TRUE	FALSE	NA	NA	NA	NA	NA	NA	NA	NA	NA	NA	NA	0	0	0	0.925301	0	0.46265	Inf	0	0	0	0.0741228	0	0.0370614	Inf
lectin-24A	TRUE	FALSE	NA	NA	NA	NA	NA	NA	NA	NA	NA	NA	TRUE	FALSE	NA	NA	NA	NA	NA	NA	NA	NA	NA	NA	NA	0	0	0	2.7759	0	1.38795	Inf	0	0	0	0.212613	0	0.106306	Inf
lectin-28C	TRUE	FALSE	NA	NA	NA	NA	NA	NA	NA	NA	NA	NA	TRUE	FALSE	NA	NA	NA	NA	NA	NA	NA	NA	NA	NA	NA	0	13.1093	0	5.97418	0	9.54173	Inf	0	0.420443	0	0.191376	0	0.305909	Inf
lectin-37Da	TRUE	FALSE	NA	NA	NA	NA	NA	NA	NA	NA	NA	NA	TRUE	FALSE	NA	NA	NA	NA	NA	NA	NA	NA	NA	NA	NA	0	0	0	4.69501	0	2.3475	Inf	0	0	0	0.625573	0	0.312786	Inf
lectin-37Db	TRUE	FALSE	NA	NA	NA	NA	NA	NA	NA	NA	NA	NA	TRUE	FALSE	NA	NA	NA	NA	NA	NA	NA	NA	NA	NA	NA	0	0	0	7.25966	0	3.62983	Inf	0	0	0	1.21048	0	0.605239	Inf
lin-28	TRUE	FALSE	NA	NA	NA	NA	NA	NA	NA	NA	NA	NA	TRUE	FALSE	NA	NA	NA	NA	NA	NA	NA	NA	NA	NA	NA	0	4.06082	0	1.8506	0	2.95571	Inf	0	0.253236	0	0.115267	0	0.184252	Inf
List	TRUE	FALSE	NA	NA	NA	NA	NA	NA	NA	NA	NA	NA	TRUE	FALSE	NA	NA	NA	NA	NA	NA	NA	NA	NA	NA	NA	0	2.05535	0	3.74667	0	2.90101	Inf	0	0.0741195	0	0.13495	0	0.104535	Inf
Listericin	TRUE	FALSE	NA	NA	NA	NA	NA	NA	NA	NA	NA	NA	TRUE	FALSE	NA	NA	NA	NA	NA	NA	NA	NA	NA	NA	NA	0	1.0152	0	0	0	0.507602	Inf	0	0.240377	0	0	0	0.120188	Inf
Lkr	TRUE	FALSE	NA	NA	NA	NA	NA	NA	NA	NA	NA	NA	TRUE	FALSE	NA	NA	NA	NA	NA	NA	NA	NA	NA	NA	NA	0	1.0152	0	0	0	0.507602	Inf	0	0.022092	0	0	0	0.011046	Inf
LS2	TRUE	FALSE	NA	NA	NA	NA	NA	NA	NA	NA	NA	NA	TRUE	FALSE	NA	NA	NA	NA	NA	NA	NA	NA	NA	NA	NA	0	1.0152	0	0.925301	0	0.970253	Inf	0	0.0498211	0	0.0453549	0	0.047588	Inf
LysB	TRUE	FALSE	NA	NA	NA	NA	NA	NA	NA	NA	NA	NA	TRUE	FALSE	NA	NA	NA	NA	NA	NA	NA	NA	NA	NA	NA	0	0	0	182.292	0	91.1458	Inf	0	0	0	30.9607	0	15.4803	Inf
LysC	TRUE	FALSE	NA	NA	NA	NA	NA	NA	NA	NA	NA	NA	TRUE	FALSE	NA	NA	NA	NA	NA	NA	NA	NA	NA	NA	NA	0	0	0	4.67303	0	2.33652	Inf	0	0	0	0.963162	0	0.481581	Inf
LysE	TRUE	FALSE	NA	NA	NA	NA	NA	NA	NA	NA	NA	NA	TRUE	FALSE	NA	NA	NA	NA	NA	NA	NA	NA	NA	NA	NA	0	0	0	32.0269	0	16.0134	Inf	0	0	0	4.98976	0	2.49488	Inf
LysP	TRUE	FALSE	NA	NA	NA	NA	NA	NA	NA	NA	NA	NA	TRUE	FALSE	NA	NA	NA	NA	NA	NA	NA	NA	NA	NA	NA	0	0	0	3.7012	0	1.8506	Inf	0	0	0	0.528128	0	0.264064	Inf
Mal-A1	TRUE	FALSE	NA	NA	NA	NA	NA	NA	NA	NA	NA	NA	TRUE	FALSE	NA	NA	NA	NA	NA	NA	NA	NA	NA	NA	NA	0	1.0152	0	211.894	0	106.455	Inf	0	0.0370825	0	7.73064	0	3.88386	Inf
Mal-A2	TRUE	FALSE	NA	NA	NA	NA	NA	NA	NA	NA	NA	NA	TRUE	FALSE	NA	NA	NA	NA	NA	NA	NA	NA	NA	NA	NA	0	0	0	11.1036	0	5.55181	Inf	0	0	0	0.358789	0	0.179395	Inf
Mal-A7	TRUE	FALSE	NA	NA	NA	NA	NA	NA	NA	NA	NA	NA	TRUE	FALSE	NA	NA	NA	NA	NA	NA	NA	NA	NA	NA	NA	0	0	0	50.0542	0	25.0271	Inf	0	0	0	1.40017	0	0.700083	Inf
Mal-A8	TRUE	FALSE	NA	NA	NA	NA	NA	NA	NA	NA	NA	NA	TRUE	FALSE	NA	NA	NA	NA	NA	NA	NA	NA	NA	NA	NA	0	0	0	32.3855	0	16.1928	Inf	0	0	0	1.19032	0	0.595159	Inf
Met75Ca	TRUE	FALSE	NA	NA	NA	NA	NA	NA	NA	NA	NA	NA	TRUE	FALSE	NA	NA	NA	NA	NA	NA	NA	NA	NA	NA	NA	0	0	0	0.925301	0	0.46265	Inf	0	0	0	0.919492	0	0.459746	Inf
Met75Cb	TRUE	FALSE	NA	NA	NA	NA	NA	NA	NA	NA	NA	NA	TRUE	FALSE	NA	NA	NA	NA	NA	NA	NA	NA	NA	NA	NA	0	0	0	0.925301	0	0.46265	Inf	0	0	0	0.919492	0	0.459746	Inf
mex1	TRUE	FALSE	NA	NA	NA	NA	NA	NA	NA	NA	NA	NA	TRUE	FALSE	NA	NA	NA	NA	NA	NA	NA	NA	NA	NA	NA	0	1.97691	0	5.88861	0	3.93276	Inf	0	0.216767	0	0.644914	0	0.430841	Inf
MFS3	TRUE	FALSE	NA	NA	NA	NA	NA	NA	NA	NA	NA	NA	TRUE	FALSE	NA	NA	NA	NA	NA	NA	NA	NA	NA	NA	NA	0	8.12164	0	2.7759	0	5.44877	Inf	0	0.263752	0	0.0900405	0	0.176896	Inf
mthl13	TRUE	FALSE	NA	NA	NA	NA	NA	NA	NA	NA	NA	NA	TRUE	FALSE	NA	NA	NA	NA	NA	NA	NA	NA	NA	NA	NA	0	1.0152	0	0	0	0.507602	Inf	0	0.0536774	0	0	0	0.0268387	Inf
mthl7	TRUE	FALSE	NA	NA	NA	NA	NA	NA	NA	NA	NA	NA	TRUE	FALSE	NA	NA	NA	NA	NA	NA	NA	NA	NA	NA	NA	0	3.10504	0	0.943356	0	2.0242	Inf	0	0.147155	0	0.0446543	0	0.0959044	Inf
MtnB	TRUE	FALSE	NA	NA	NA	NA	NA	NA	NA	NA	NA	NA	TRUE	FALSE	NA	NA	NA	NA	NA	NA	NA	NA	NA	NA	NA	0	12.4221	0	26.418	0	19.42	Inf	0	2.96488	0	6.29789	0	4.63138	Inf
MtnC	TRUE	FALSE	NA	NA	NA	NA	NA	NA	NA	NA	NA	NA	TRUE	FALSE	NA	NA	NA	NA	NA	NA	NA	NA	NA	NA	NA	0	0	0	13.8795	0	6.93976	Inf	0	0	0	10.6271	0	5.31354	Inf
MtnD	TRUE	FALSE	NA	NA	NA	NA	NA	NA	NA	NA	NA	NA	TRUE	FALSE	NA	NA	NA	NA	NA	NA	NA	NA	NA	NA	NA	0	0	0	5.55181	0	2.7759	Inf	0	0	0	4.01656	0	2.00828	Inf
Muc18B	TRUE	FALSE	NA	NA	NA	NA	NA	NA	NA	NA	NA	NA	TRUE	FALSE	NA	NA	NA	NA	NA	NA	NA	NA	NA	NA	NA	0	1.06077	0	0	0	0.530383	Inf	0	0.0694287	0	0	0	0.0347143	Inf
Muc55B	TRUE	FALSE	NA	NA	NA	NA	NA	NA	NA	NA	NA	NA	TRUE	FALSE	NA	NA	NA	NA	NA	NA	NA	NA	NA	NA	NA	0	0	0	0.993903	0	0.496952	Inf	0	0	0	0.0393444	0	0.0196722	Inf
Muc68D	TRUE	FALSE	NA	NA	NA	NA	NA	NA	NA	NA	NA	NA	TRUE	FALSE	NA	NA	NA	NA	NA	NA	NA	NA	NA	NA	NA	0	1.0152	0	0	0	0.507602	Inf	0	0.0131074	0	0	0	0.00655368	Inf
Mur29B	TRUE	FALSE	NA	NA	NA	NA	NA	NA	NA	NA	NA	NA	TRUE	FALSE	NA	NA	NA	NA	NA	NA	NA	NA	NA	NA	NA	0	0	0	13.8795	0	6.93976	Inf	0	0	0	0.488944	0	0.244472	Inf
nAChRalpha2	TRUE	FALSE	NA	NA	NA	NA	NA	NA	NA	NA	NA	NA	TRUE	FALSE	NA	NA	NA	NA	NA	NA	NA	NA	NA	NA	NA	0	1.03149	0	0	0	0.515743	Inf	0	0.0284591	0	0	0	0.0142295	Inf
nAChRbeta1	TRUE	FALSE	NA	NA	NA	NA	NA	NA	NA	NA	NA	NA	TRUE	FALSE	NA	NA	NA	NA	NA	NA	NA	NA	NA	NA	NA	0	0.646569	0	1.17862	0	0.912595	Inf	0	0.0266843	0	0.0485844	0	0.0376343	Inf
nAChRbeta3	TRUE	FALSE	NA	NA	NA	NA	NA	NA	NA	NA	NA	NA	TRUE	FALSE	NA	NA	NA	NA	NA	NA	NA	NA	NA	NA	NA	0	5.07602	0	1.8506	0	3.46331	Inf	0	0.226307	0	0.0824077	0	0.154357	Inf
nau	TRUE	FALSE	NA	NA	NA	NA	NA	NA	NA	NA	NA	NA	TRUE	FALSE	NA	NA	NA	NA	NA	NA	NA	NA	NA	NA	NA	0	0	0	0.929503	0	0.464752	Inf	0	0	0	0.0415782	0	0.0207891	Inf
nerfin-2	TRUE	FALSE	NA	NA	NA	NA	NA	NA	NA	NA	NA	NA	TRUE	FALSE	NA	NA	NA	NA	NA	NA	NA	NA	NA	NA	NA	0	0	0	0.925301	0	0.46265	Inf	0	0	0	0.0243568	0	0.0121784	Inf
Neu2	TRUE	FALSE	NA	NA	NA	NA	NA	NA	NA	NA	NA	NA	TRUE	FALSE	NA	NA	NA	NA	NA	NA	NA	NA	NA	NA	NA	0	0	0	2.03227	0	1.01613	Inf	0	0	0	0.1185	0	0.0592501	Inf
NimB3	TRUE	FALSE	NA	NA	NA	NA	NA	NA	NA	NA	NA	NA	TRUE	FALSE	NA	NA	NA	NA	NA	NA	NA	NA	NA	NA	NA	0	0	0	0.925301	0	0.46265	Inf	0	0	0	0.205715	0	0.102857	Inf
NimC2	TRUE	FALSE	NA	NA	NA	NA	NA	NA	NA	NA	NA	NA	TRUE	FALSE	NA	NA	NA	NA	NA	NA	NA	NA	NA	NA	NA	0	0	0	0.813346	0	0.406673	Inf	0	0	0	0.0209636	0	0.0104818	Inf
NimC3	TRUE	FALSE	NA	NA	NA	NA	NA	NA	NA	NA	NA	NA	TRUE	FALSE	NA	NA	NA	NA	NA	NA	NA	NA	NA	NA	NA	0	0	0	0.925301	0	0.46265	Inf	0	0	0	0.0841118	0	0.0420559	Inf
NimC4	TRUE	FALSE	NA	NA	NA	NA	NA	NA	NA	NA	NA	NA	TRUE	FALSE	NA	NA	NA	NA	NA	NA	NA	NA	NA	NA	NA	0	0	0	0.925301	0	0.46265	Inf	0	0	0	0.0507154	0	0.0253577	Inf
ninaB	TRUE	FALSE	NA	NA	NA	NA	NA	NA	NA	NA	NA	NA	TRUE	FALSE	NA	NA	NA	NA	NA	NA	NA	NA	NA	NA	NA	0	1.0152	0	0	0	0.507602	Inf	0	0.030704	0	0	0	0.015352	Inf
ninaD	TRUE	FALSE	NA	NA	NA	NA	NA	NA	NA	NA	NA	NA	TRUE	FALSE	NA	NA	NA	NA	NA	NA	NA	NA	NA	NA	NA	0	0	0	1.08114	0	0.540569	Inf	0	0	0	0.0480532	0	0.0240266	Inf
ninaG	TRUE	FALSE	NA	NA	NA	NA	NA	NA	NA	NA	NA	NA	TRUE	FALSE	NA	NA	NA	NA	NA	NA	NA	NA	NA	NA	NA	0	3.08887	0	1.87688	0	2.48287	Inf	0	0.107101	0	0.0649996	0	0.0860501	Inf
Np	TRUE	FALSE	NA	NA	NA	NA	NA	NA	NA	NA	NA	NA	TRUE	FALSE	NA	NA	NA	NA	NA	NA	NA	NA	NA	NA	NA	0	1.05359	0	0	0	0.526797	Inf	0	0.0166528	0	0	0	0.00832641	Inf
Npc1b	TRUE	FALSE	NA	NA	NA	NA	NA	NA	NA	NA	NA	NA	TRUE	FALSE	NA	NA	NA	NA	NA	NA	NA	NA	NA	NA	NA	0	1.0152	0	1.8506	0	1.4329	Inf	0	0.015995	0	0.0291223	0	0.0225586	Inf
Npc2d	TRUE	FALSE	NA	NA	NA	NA	NA	NA	NA	NA	NA	NA	TRUE	FALSE	NA	NA	NA	NA	NA	NA	NA	NA	NA	NA	NA	0	0	0	1.8506	0	0.925301	Inf	0	0	0	0.237772	0	0.118886	Inf
Npc2e	TRUE	FALSE	NA	NA	NA	NA	NA	NA	NA	NA	NA	NA	TRUE	FALSE	NA	NA	NA	NA	NA	NA	NA	NA	NA	NA	NA	0	0	0	0.925301	0	0.46265	Inf	0	0	0	0.118886	0	0.0594429	Inf
Nplp3	TRUE	FALSE	NA	NA	NA	NA	NA	NA	NA	NA	NA	NA	TRUE	FALSE	NA	NA	NA	NA	NA	NA	NA	NA	NA	NA	NA	0	1.0152	0	0	0	0.507602	Inf	0	0.177977	0	0	0	0.0889885	Inf
Ntf-2r	TRUE	FALSE	NA	NA	NA	NA	NA	NA	NA	NA	NA	NA	TRUE	FALSE	NA	NA	NA	NA	NA	NA	NA	NA	NA	NA	NA	0	1.0156	0	0	0	0.507799	Inf	0	0.105519	0	0	0	0.0527597	Inf
nyo	TRUE	FALSE	NA	NA	NA	NA	NA	NA	NA	NA	NA	NA	TRUE	FALSE	NA	NA	NA	NA	NA	NA	NA	NA	NA	NA	NA	0	1.02701	0	0.936063	0	0.981538	Inf	0	0.0173272	0	0.0157739	0	0.0165505	Inf
Oatp26F	TRUE	FALSE	NA	NA	NA	NA	NA	NA	NA	NA	NA	NA	TRUE	FALSE	NA	NA	NA	NA	NA	NA	NA	NA	NA	NA	NA	0	2.03041	0	4.6265	0	3.32846	Inf	0	0.0543788	0	0.12376	0	0.0890693	Inf
Obp50e	TRUE	FALSE	NA	NA	NA	NA	NA	NA	NA	NA	NA	NA	TRUE	FALSE	NA	NA	NA	NA	NA	NA	NA	NA	NA	NA	NA	0	1.0152	0	0	0	0.507602	Inf	0	0.108514	0	0	0	0.054257	Inf
Obp83b	TRUE	FALSE	NA	NA	NA	NA	NA	NA	NA	NA	NA	NA	TRUE	FALSE	NA	NA	NA	NA	NA	NA	NA	NA	NA	NA	NA	0	0	0	0.925301	0	0.46265	Inf	0	0	0	0.166947	0	0.0834735	Inf
Obp83ef	TRUE	FALSE	NA	NA	NA	NA	NA	NA	NA	NA	NA	NA	TRUE	FALSE	NA	NA	NA	NA	NA	NA	NA	NA	NA	NA	NA	0	1.0152	0	0	0	0.507602	Inf	0	0.0859453	0	0	0	0.0429727	Inf
ocn	TRUE	FALSE	NA	NA	NA	NA	NA	NA	NA	NA	NA	NA	TRUE	FALSE	NA	NA	NA	NA	NA	NA	NA	NA	NA	NA	NA	0	1.0152	0	0	0	0.507602	Inf	0	0.143652	0	0	0	0.0718262	Inf
Odc2	TRUE	FALSE	NA	NA	NA	NA	NA	NA	NA	NA	NA	NA	TRUE	FALSE	NA	NA	NA	NA	NA	NA	NA	NA	NA	NA	NA	0	0	0	0.925301	0	0.46265	Inf	0	0	0	0.0513796	0	0.0256898	Inf
odd	TRUE	FALSE	NA	NA	NA	NA	NA	NA	NA	NA	NA	NA	TRUE	FALSE	NA	NA	NA	NA	NA	NA	NA	NA	NA	NA	NA	0	0	0	10.1783	0	5.08915	Inf	0	0	0	0.281271	0	0.140636	Inf
OdsH	TRUE	FALSE	NA	NA	NA	NA	NA	NA	NA	NA	NA	NA	TRUE	FALSE	NA	NA	NA	NA	NA	NA	NA	NA	NA	NA	NA	0	3.04561	0	1.8506	0	2.44811	Inf	0	0.166055	0	0.100779	0	0.133417	Inf
Or13a	TRUE	FALSE	NA	NA	NA	NA	NA	NA	NA	NA	NA	NA	TRUE	FALSE	NA	NA	NA	NA	NA	NA	NA	NA	NA	NA	NA	0	1.0152	0	0.925301	0	0.970253	Inf	0	0.0570259	0	0.0519138	0	0.0544699	Inf
Or19a	TRUE	FALSE	NA	NA	NA	NA	NA	NA	NA	NA	NA	NA	TRUE	FALSE	NA	NA	NA	NA	NA	NA	NA	NA	NA	NA	NA	0	0.507602	0	0	0	0.253801	Inf	0	0.0312609	0	0	0	0.0156304	Inf
Or19b	TRUE	FALSE	NA	NA	NA	NA	NA	NA	NA	NA	NA	NA	TRUE	FALSE	NA	NA	NA	NA	NA	NA	NA	NA	NA	NA	NA	0	0.507602	0	0	0	0.253801	Inf	0	0.0312609	0	0	0	0.0156304	Inf
Or22b	TRUE	FALSE	NA	NA	NA	NA	NA	NA	NA	NA	NA	NA	TRUE	FALSE	NA	NA	NA	NA	NA	NA	NA	NA	NA	NA	NA	0	1.0152	0	0	0	0.507602	Inf	0	0.0548985	0	0	0	0.0274492	Inf
Or46a	TRUE	FALSE	NA	NA	NA	NA	NA	NA	NA	NA	NA	NA	TRUE	FALSE	NA	NA	NA	NA	NA	NA	NA	NA	NA	NA	NA	0	1.09369	0	1.72669	0	1.41019	Inf	0	0.0605758	0	0.0955214	0	0.0780486	Inf
Or47a	TRUE	FALSE	NA	NA	NA	NA	NA	NA	NA	NA	NA	NA	TRUE	FALSE	NA	NA	NA	NA	NA	NA	NA	NA	NA	NA	NA	0	1.0152	0	0	0	0.507602	Inf	0	0.0520116	0	0	0	0.0260058	Inf
Or65b	TRUE	FALSE	NA	NA	NA	NA	NA	NA	NA	NA	NA	NA	TRUE	FALSE	NA	NA	NA	NA	NA	NA	NA	NA	NA	NA	NA	0	1.0152	0	0	0	0.507602	Inf	0	0.0590347	0	0	0	0.0295173	Inf
Or67c	TRUE	FALSE	NA	NA	NA	NA	NA	NA	NA	NA	NA	NA	TRUE	FALSE	NA	NA	NA	NA	NA	NA	NA	NA	NA	NA	NA	0	1.0152	0	4.6265	0	2.82085	Inf	0	0.0593833	0	0.270299	0	0.164841	Inf
Or69a	TRUE	FALSE	NA	NA	NA	NA	NA	NA	NA	NA	NA	NA	TRUE	FALSE	NA	NA	NA	NA	NA	NA	NA	NA	NA	NA	NA	0	1.0152	0	0	0	0.507602	Inf	0	0.0613769	0	0	0	0.0306884	Inf
Or74a	TRUE	FALSE	NA	NA	NA	NA	NA	NA	NA	NA	NA	NA	TRUE	FALSE	NA	NA	NA	NA	NA	NA	NA	NA	NA	NA	NA	0	1.0152	0	0	0	0.507602	Inf	0	0.0593833	0	0	0	0.0296917	Inf
Or94a	TRUE	FALSE	NA	NA	NA	NA	NA	NA	NA	NA	NA	NA	TRUE	FALSE	NA	NA	NA	NA	NA	NA	NA	NA	NA	NA	NA	0	1.0152	0	0	0	0.507602	Inf	0	0.0625217	0	0	0	0.0312609	Inf
OS9	TRUE	FALSE	NA	NA	NA	NA	NA	NA	NA	NA	NA	NA	TRUE	FALSE	NA	NA	NA	NA	NA	NA	NA	NA	NA	NA	NA	0	1.0152	0	0	0	0.507602	Inf	0	0.102434	0	0	0	0.0512171	Inf
Osi10	TRUE	FALSE	NA	NA	NA	NA	NA	NA	NA	NA	NA	NA	TRUE	FALSE	NA	NA	NA	NA	NA	NA	NA	NA	NA	NA	NA	0	1.0152	0	0	0	0.507602	Inf	0	0.0393821	0	0	0	0.019691	Inf
Osi5	TRUE	FALSE	NA	NA	NA	NA	NA	NA	NA	NA	NA	NA	TRUE	FALSE	NA	NA	NA	NA	NA	NA	NA	NA	NA	NA	NA	0	1.01739	0	0	0	0.508696	Inf	0	0.0874383	0	0	0	0.0437191	Inf
Osi9	TRUE	FALSE	NA	NA	NA	NA	NA	NA	NA	NA	NA	NA	TRUE	FALSE	NA	NA	NA	NA	NA	NA	NA	NA	NA	NA	NA	0	1.0152	0	0	0	0.507602	Inf	0	0.0519668	0	0	0	0.0259834	Inf
Pebp1	TRUE	FALSE	NA	NA	NA	NA	NA	NA	NA	NA	NA	NA	TRUE	FALSE	NA	NA	NA	NA	NA	NA	NA	NA	NA	NA	NA	0	1.0152	0	71.2482	0	36.1317	Inf	0	0.134975	0	9.4614	0	4.79819	Inf
PGRP-SC2	TRUE	FALSE	NA	NA	NA	NA	NA	NA	NA	NA	NA	NA	TRUE	FALSE	NA	NA	NA	NA	NA	NA	NA	NA	NA	NA	NA	0	2.03041	0	27.759	0	14.8947	Inf	0	0.220599	0	3.01235	0	1.61647	Inf
PH4alphaMP	TRUE	FALSE	NA	NA	NA	NA	NA	NA	NA	NA	NA	NA	TRUE	FALSE	NA	NA	NA	NA	NA	NA	NA	NA	NA	NA	NA	0	0	0	1.8506	0	0.925301	Inf	0	0	0	0.06527	0	0.032635	Inf
PH4alphaNE2	TRUE	FALSE	NA	NA	NA	NA	NA	NA	NA	NA	NA	NA	TRUE	FALSE	NA	NA	NA	NA	NA	NA	NA	NA	NA	NA	NA	0	0	0	0.925301	0	0.46265	Inf	0	0	0	0.0346966	0	0.0173483	Inf
Phae1	TRUE	FALSE	NA	NA	NA	NA	NA	NA	NA	NA	NA	NA	TRUE	FALSE	NA	NA	NA	NA	NA	NA	NA	NA	NA	NA	NA	0	0	0	13.8126	0	6.9063	Inf	0	0	0	0.934893	0	0.467447	Inf
Phae2	TRUE	FALSE	NA	NA	NA	NA	NA	NA	NA	NA	NA	NA	TRUE	FALSE	NA	NA	NA	NA	NA	NA	NA	NA	NA	NA	NA	0	0	0	8.80855	0	4.40428	Inf	0	0	0	0.639592	0	0.319796	Inf
PK1-R	TRUE	FALSE	NA	NA	NA	NA	NA	NA	NA	NA	NA	NA	TRUE	FALSE	NA	NA	NA	NA	NA	NA	NA	NA	NA	NA	NA	0	0.81528	0	0	0	0.40764	Inf	0	0.0260844	0	0	0	0.0130422	Inf
PK2-R2	TRUE	FALSE	NA	NA	NA	NA	NA	NA	NA	NA	NA	NA	TRUE	FALSE	NA	NA	NA	NA	NA	NA	NA	NA	NA	NA	NA	0	1.07713	0	0	0	0.538567	Inf	0	0.0249517	0	0	0	0.0124759	Inf
Pk34A	TRUE	FALSE	NA	NA	NA	NA	NA	NA	NA	NA	NA	NA	TRUE	FALSE	NA	NA	NA	NA	NA	NA	NA	NA	NA	NA	NA	0	0	0	0.925301	0	0.46265	Inf	0	0	0	0.0497507	0	0.0248754	Inf
Pkg21D	TRUE	FALSE	NA	NA	NA	NA	NA	NA	NA	NA	NA	NA	TRUE	FALSE	NA	NA	NA	NA	NA	NA	NA	NA	NA	NA	NA	0	0	0	0.925301	0	0.46265	Inf	0	0	0	0.0230389	0	0.0115194	Inf
pncr016:2R	FALSE	FALSE	NA	NA	NA	NA	NA	NA	NA	NA	NA	NA	FALSE	FALSE	NA	NA	NA	NA	NA	NA	NA	NA	NA	NA	NA	0	0	0	0.925301	0	0.46265	Inf	0	0	0	0.180676	0	0.0903382	Inf
pnr	TRUE	FALSE	NA	NA	NA	NA	NA	NA	NA	NA	NA	NA	TRUE	FALSE	NA	NA	NA	NA	NA	NA	NA	NA	NA	NA	NA	0	0	0	2.19488	0	1.09744	Inf	0	0	0	0.0435737	0	0.0217868	Inf
Pp1-13C	TRUE	FALSE	NA	NA	NA	NA	NA	NA	NA	NA	NA	NA	TRUE	FALSE	NA	NA	NA	NA	NA	NA	NA	NA	NA	NA	NA	0	1.0152	0	1.8506	0	1.4329	Inf	0	0.0356369	0	0.0648845	0	0.0502607	Inf
Pph13	TRUE	FALSE	NA	NA	NA	NA	NA	NA	NA	NA	NA	NA	TRUE	FALSE	NA	NA	NA	NA	NA	NA	NA	NA	NA	NA	NA	0	5.07602	0	1.8506	0	3.46331	Inf	0	0.179457	0	0.0653476	0	0.122402	Inf
ppk	TRUE	FALSE	NA	NA	NA	NA	NA	NA	NA	NA	NA	NA	TRUE	FALSE	NA	NA	NA	NA	NA	NA	NA	NA	NA	NA	NA	0	0	0	0.925301	0	0.46265	Inf	0	0	0	0.0242707	0	0.0121354	Inf
ppk14	TRUE	FALSE	NA	NA	NA	NA	NA	NA	NA	NA	NA	NA	TRUE	FALSE	NA	NA	NA	NA	NA	NA	NA	NA	NA	NA	NA	0	1.0152	0	0	0	0.507602	Inf	0	0.0505728	0	0	0	0.0252864	Inf
ppk16	TRUE	FALSE	NA	NA	NA	NA	NA	NA	NA	NA	NA	NA	TRUE	FALSE	NA	NA	NA	NA	NA	NA	NA	NA	NA	NA	NA	0	2.03041	0	2.7759	0	2.40316	Inf	0	0.0862521	0	0.11778	0	0.102016	Inf
ppk18	TRUE	FALSE	NA	NA	NA	NA	NA	NA	NA	NA	NA	NA	TRUE	FALSE	NA	NA	NA	NA	NA	NA	NA	NA	NA	NA	NA	0	0	0	0.925301	0	0.46265	Inf	0	0	0	0.0375425	0	0.0187713	Inf
ppk23	TRUE	FALSE	NA	NA	NA	NA	NA	NA	NA	NA	NA	NA	TRUE	FALSE	NA	NA	NA	NA	NA	NA	NA	NA	NA	NA	NA	0	1.82448	0	0.773039	0	1.29876	Inf	0	0.0685606	0	0.0290146	0	0.0487876	Inf
ppk24	TRUE	FALSE	NA	NA	NA	NA	NA	NA	NA	NA	NA	NA	TRUE	FALSE	NA	NA	NA	NA	NA	NA	NA	NA	NA	NA	NA	0	0	0	0.925301	0	0.46265	Inf	0	0	0	0.0345656	0	0.0172828	Inf
ppk3	TRUE	FALSE	NA	NA	NA	NA	NA	NA	NA	NA	NA	NA	TRUE	FALSE	NA	NA	NA	NA	NA	NA	NA	NA	NA	NA	NA	0	1.0152	0	0	0	0.507602	Inf	0	0.04282	0	0	0	0.02141	Inf
ppk30	TRUE	FALSE	NA	NA	NA	NA	NA	NA	NA	NA	NA	NA	TRUE	FALSE	NA	NA	NA	NA	NA	NA	NA	NA	NA	NA	NA	0	0	0	0.962917	0	0.481459	Inf	0	0	0	0.0351631	0	0.0175815	Inf
ppk31	TRUE	FALSE	NA	NA	NA	NA	NA	NA	NA	NA	NA	NA	TRUE	FALSE	NA	NA	NA	NA	NA	NA	NA	NA	NA	NA	NA	0	1.0152	0	0	0	0.507602	Inf	0	0.0569721	0	0	0	0.028486	Inf
prc	TRUE	FALSE	NA	NA	NA	NA	NA	NA	NA	NA	NA	NA	TRUE	FALSE	NA	NA	NA	NA	NA	NA	NA	NA	NA	NA	NA	0	2.03041	0	1.8506	0	1.94051	Inf	0	0.0226136	0	0.0205864	0	0.0216	Inf
Prosbeta4R1	TRUE	FALSE	NA	NA	NA	NA	NA	NA	NA	NA	NA	NA	TRUE	FALSE	NA	NA	NA	NA	NA	NA	NA	NA	NA	NA	NA	0	1.0152	0	0	0	0.507602	Inf	0	0.095616	0	0	0	0.047808	Inf
Prosbeta5R2	TRUE	FALSE	NA	NA	NA	NA	NA	NA	NA	NA	NA	NA	TRUE	FALSE	NA	NA	NA	NA	NA	NA	NA	NA	NA	NA	NA	0	2.55009	0	1.16213	0	1.85611	Inf	0	0.136656	0	0.0622026	0	0.0994292	Inf
Ptth	TRUE	FALSE	NA	NA	NA	NA	NA	NA	NA	NA	NA	NA	TRUE	FALSE	NA	NA	NA	NA	NA	NA	NA	NA	NA	NA	NA	0	0.80102	0	1.46017	0	1.13059	Inf	0	0.0735775	0	0.133963	0	0.10377	Inf
Rab26	TRUE	FALSE	NA	NA	NA	NA	NA	NA	NA	NA	NA	NA	TRUE	FALSE	NA	NA	NA	NA	NA	NA	NA	NA	NA	NA	NA	0	0.675194	0	1.8462	0	1.2607	Inf	0	0.019117	0	0.0522097	0	0.0356633	Inf
Rab9D	TRUE	FALSE	NA	NA	NA	NA	NA	NA	NA	NA	NA	NA	TRUE	FALSE	NA	NA	NA	NA	NA	NA	NA	NA	NA	NA	NA	0	2.03041	0	0	0	1.0152	Inf	0	0.172876	0	0	0	0.0864379	Inf
rdgC	TRUE	FALSE	NA	NA	NA	NA	NA	NA	NA	NA	NA	NA	TRUE	FALSE	NA	NA	NA	NA	NA	NA	NA	NA	NA	NA	NA	0	2.24973	0	2.83678	0	2.54325	Inf	0	0.0327898	0	0.0412967	0	0.0370432	Inf
resilin	TRUE	FALSE	NA	NA	NA	NA	NA	NA	NA	NA	NA	NA	TRUE	FALSE	NA	NA	NA	NA	NA	NA	NA	NA	NA	NA	NA	0	1.10907	0	0	0	0.554535	Inf	0	0.0289785	0	0	0	0.0144893	Inf
Rh4	TRUE	FALSE	NA	NA	NA	NA	NA	NA	NA	NA	NA	NA	TRUE	FALSE	NA	NA	NA	NA	NA	NA	NA	NA	NA	NA	NA	0	1.0152	0	0.925301	0	0.970253	Inf	0	0.0524638	0	0.0477607	0	0.0501123	Inf
Rh5	TRUE	FALSE	NA	NA	NA	NA	NA	NA	NA	NA	NA	NA	TRUE	FALSE	NA	NA	NA	NA	NA	NA	NA	NA	NA	NA	NA	0	1.11469	0	1.01598	0	1.06533	Inf	0	0.0525552	0	0.0478439	0	0.0501996	Inf
Rh50	TRUE	FALSE	NA	NA	NA	NA	NA	NA	NA	NA	NA	NA	TRUE	FALSE	NA	NA	NA	NA	NA	NA	NA	NA	NA	NA	NA	0	1.10079	0	3.00991	0	2.05535	Inf	0	0.036856	0	0.100656	0	0.0687561	Inf
Rh6	TRUE	FALSE	NA	NA	NA	NA	NA	NA	NA	NA	NA	NA	TRUE	FALSE	NA	NA	NA	NA	NA	NA	NA	NA	NA	NA	NA	0	2.03041	0	2.7759	0	2.40316	Inf	0	0.0946406	0	0.129235	0	0.111938	Inf
RpL10Aa	TRUE	FALSE	NA	NA	NA	NA	NA	NA	NA	NA	NA	NA	TRUE	FALSE	NA	NA	NA	NA	NA	NA	NA	NA	NA	NA	NA	0	1.0152	0	0	0	0.507602	Inf	0	0.103135	0	0	0	0.0515673	Inf
Rpn12R	TRUE	FALSE	NA	NA	NA	NA	NA	NA	NA	NA	NA	NA	TRUE	FALSE	NA	NA	NA	NA	NA	NA	NA	NA	NA	NA	NA	0	0	0	0.925301	0	0.46265	Inf	0	0	0	0.0741228	0	0.0370614	Inf
Rpt4R	TRUE	FALSE	NA	NA	NA	NA	NA	NA	NA	NA	NA	NA	TRUE	FALSE	NA	NA	NA	NA	NA	NA	NA	NA	NA	NA	NA	0	0	0	0.968383	0	0.484192	Inf	0	0	0	0.0460778	0	0.0230389	Inf
s-cup	TRUE	FALSE	NA	NA	NA	NA	NA	NA	NA	NA	NA	NA	TRUE	FALSE	NA	NA	NA	NA	NA	NA	NA	NA	NA	NA	NA	0	0	0	1.8506	0	0.925301	Inf	0	0	0	0.0553397	0	0.0276699	Inf
S-Lap1	TRUE	FALSE	NA	NA	NA	NA	NA	NA	NA	NA	NA	NA	TRUE	FALSE	NA	NA	NA	NA	NA	NA	NA	NA	NA	NA	NA	0	0	0	0.925301	0	0.46265	Inf	0	0	0	0.0285768	0	0.0142884	Inf
S-Lap3	TRUE	FALSE	NA	NA	NA	NA	NA	NA	NA	NA	NA	NA	TRUE	FALSE	NA	NA	NA	NA	NA	NA	NA	NA	NA	NA	NA	0	1.21022	0	1.10304	0	1.15663	Inf	0	0.0309878	0	0.0282099	0	0.0295989	Inf
salr	TRUE	FALSE	NA	NA	NA	NA	NA	NA	NA	NA	NA	NA	TRUE	FALSE	NA	NA	NA	NA	NA	NA	NA	NA	NA	NA	NA	0	2.16738	0	0	0	1.08369	Inf	0	0.0306027	0	0	0	0.0153013	Inf
sc	TRUE	FALSE	NA	NA	NA	NA	NA	NA	NA	NA	NA	NA	TRUE	FALSE	NA	NA	NA	NA	NA	NA	NA	NA	NA	NA	NA	0	0	0	0.925301	0	0.46265	Inf	0	0	0	0.0443299	0	0.022165	Inf
scpr-B	TRUE	FALSE	NA	NA	NA	NA	NA	NA	NA	NA	NA	NA	TRUE	FALSE	NA	NA	NA	NA	NA	NA	NA	NA	NA	NA	NA	0	1.7303	0	0	0	0.865148	Inf	0	0.147112	0	0	0	0.0735561	Inf
scrt	TRUE	FALSE	NA	NA	NA	NA	NA	NA	NA	NA	NA	NA	TRUE	FALSE	NA	NA	NA	NA	NA	NA	NA	NA	NA	NA	NA	0	0.704444	0	1.6557	0	1.18007	Inf	0	0.00679733	0	0.0159572	0	0.0113773	Inf
se	TRUE	FALSE	NA	NA	NA	NA	NA	NA	NA	NA	NA	NA	TRUE	FALSE	NA	NA	NA	NA	NA	NA	NA	NA	NA	NA	NA	0	7.10643	0	1.8506	0	4.47852	Inf	0	0.674658	0	0.175479	0	0.425069	Inf
Send2	TRUE	FALSE	NA	NA	NA	NA	NA	NA	NA	NA	NA	NA	TRUE	FALSE	NA	NA	NA	NA	NA	NA	NA	NA	NA	NA	NA	0	2.03041	0	0	0	1.0152	Inf	0	0.209856	0	0	0	0.104928	Inf
Ser	TRUE	FALSE	NA	NA	NA	NA	NA	NA	NA	NA	NA	NA	TRUE	FALSE	NA	NA	NA	NA	NA	NA	NA	NA	NA	NA	NA	0	0	0	0.948779	0	0.474389	Inf	0	0	0	0.0102471	0	0.00512356	Inf
Ser6	TRUE	FALSE	NA	NA	NA	NA	NA	NA	NA	NA	NA	NA	TRUE	FALSE	NA	NA	NA	NA	NA	NA	NA	NA	NA	NA	NA	0	0	0	0.925301	0	0.46265	Inf	0	0	0	0.0782407	0	0.0391204	Inf
Ser7	TRUE	FALSE	NA	NA	NA	NA	NA	NA	NA	NA	NA	NA	TRUE	FALSE	NA	NA	NA	NA	NA	NA	NA	NA	NA	NA	NA	0	1.0152	0	1.8506	0	1.4329	Inf	0	0.049698	0	0.0904856	0	0.0700918	Inf
Sfp51E	TRUE	FALSE	NA	NA	NA	NA	NA	NA	NA	NA	NA	NA	TRUE	FALSE	NA	NA	NA	NA	NA	NA	NA	NA	NA	NA	NA	0	1.0152	0	0	0	0.507602	Inf	0	0.177977	0	0	0	0.0889885	Inf
Sfp93F	TRUE	FALSE	NA	NA	NA	NA	NA	NA	NA	NA	NA	NA	TRUE	FALSE	NA	NA	NA	NA	NA	NA	NA	NA	NA	NA	NA	0	0	0	0.925301	0	0.46265	Inf	0	0	0	0.420253	0	0.210126	Inf
SIFaR	TRUE	FALSE	NA	NA	NA	NA	NA	NA	NA	NA	NA	NA	TRUE	FALSE	NA	NA	NA	NA	NA	NA	NA	NA	NA	NA	NA	0	0	0	0.949174	0	0.474587	Inf	0	0	0	0.0119583	0	0.00597916	Inf
SIP2	TRUE	FALSE	NA	NA	NA	NA	NA	NA	NA	NA	NA	NA	TRUE	FALSE	NA	NA	NA	NA	NA	NA	NA	NA	NA	NA	NA	0	0	0	0.955678	0	0.477839	Inf	0	0	0	0.0202599	0	0.01013	Inf
skl	TRUE	FALSE	NA	NA	NA	NA	NA	NA	NA	NA	NA	NA	TRUE	FALSE	NA	NA	NA	NA	NA	NA	NA	NA	NA	NA	NA	0	1.0152	0	0	0	0.507602	Inf	0	0.0510003	0	0	0	0.0255002	Inf
slp2	TRUE	FALSE	NA	NA	NA	NA	NA	NA	NA	NA	NA	NA	TRUE	FALSE	NA	NA	NA	NA	NA	NA	NA	NA	NA	NA	NA	0	0	0	0.925301	0	0.46265	Inf	0	0	0	0.025582	0	0.012791	Inf
sNPF	TRUE	FALSE	NA	NA	NA	NA	NA	NA	NA	NA	NA	NA	TRUE	FALSE	NA	NA	NA	NA	NA	NA	NA	NA	NA	NA	NA	0	0	0	0.925301	0	0.46265	Inf	0	0	0	0.0244327	0	0.0122163	Inf
Sp1	TRUE	FALSE	NA	NA	NA	NA	NA	NA	NA	NA	NA	NA	TRUE	FALSE	NA	NA	NA	NA	NA	NA	NA	NA	NA	NA	NA	0	1.07768	0	0	0	0.53884	Inf	0	0.0188704	0	0	0	0.00943518	Inf
spag4	TRUE	FALSE	NA	NA	NA	NA	NA	NA	NA	NA	NA	NA	TRUE	FALSE	NA	NA	NA	NA	NA	NA	NA	NA	NA	NA	NA	0	2.03041	0	0	0	1.0152	Inf	0	0.135277	0	0	0	0.0676385	Inf
spheroide	TRUE	FALSE	NA	NA	NA	NA	NA	NA	NA	NA	NA	NA	TRUE	FALSE	NA	NA	NA	NA	NA	NA	NA	NA	NA	NA	NA	0	0	0	7.40241	0	3.7012	Inf	0	0	0	0.412969	0	0.206484	Inf
Spn28Db	TRUE	FALSE	NA	NA	NA	NA	NA	NA	NA	NA	NA	NA	TRUE	FALSE	NA	NA	NA	NA	NA	NA	NA	NA	NA	NA	NA	0	1.0152	0	0	0	0.507602	Inf	0	0.0610045	0	0	0	0.0305023	Inf
Spn42Db	TRUE	FALSE	NA	NA	NA	NA	NA	NA	NA	NA	NA	NA	TRUE	FALSE	NA	NA	NA	NA	NA	NA	NA	NA	NA	NA	NA	0	2.25249	0	0	0	1.12624	Inf	0	0.114268	0	0	0	0.0571339	Inf
Spn77Bb	TRUE	FALSE	NA	NA	NA	NA	NA	NA	NA	NA	NA	NA	TRUE	FALSE	NA	NA	NA	NA	NA	NA	NA	NA	NA	NA	NA	0	2.94034	0	0	0	1.47017	Inf	0	0.181646	0	0	0	0.0908232	Inf
Spn88Eb	TRUE	FALSE	NA	NA	NA	NA	NA	NA	NA	NA	NA	NA	TRUE	FALSE	NA	NA	NA	NA	NA	NA	NA	NA	NA	NA	NA	0	2.03041	0	5.55181	0	3.79111	Inf	0	0.0979438	0	0.267491	0	0.182717	Inf
St1	TRUE	FALSE	NA	NA	NA	NA	NA	NA	NA	NA	NA	NA	TRUE	FALSE	NA	NA	NA	NA	NA	NA	NA	NA	NA	NA	NA	0	5.07602	0	2.7759	0	3.92596	Inf	0	0.29957	0	0.163629	0	0.2316	Inf
St2	TRUE	FALSE	NA	NA	NA	NA	NA	NA	NA	NA	NA	NA	TRUE	FALSE	NA	NA	NA	NA	NA	NA	NA	NA	NA	NA	NA	0	0.865864	0	0	0	0.432932	Inf	0	0.0453976	0	0	0	0.0226988	Inf
Ste:CG33237	TRUE	FALSE	NA	NA	NA	NA	NA	NA	NA	NA	NA	NA	TRUE	FALSE	NA	NA	NA	NA	NA	NA	NA	NA	NA	NA	NA	0	2.82318	0	0	0	1.41159	Inf	0	0.411233	0	0	0	0.205616	Inf
Ste:CG33247	TRUE	FALSE	NA	NA	NA	NA	NA	NA	NA	NA	NA	NA	TRUE	FALSE	NA	NA	NA	NA	NA	NA	NA	NA	NA	NA	NA	0	2.82318	0	0	0	1.41159	Inf	0	0.411233	0	0	0	0.205616	Inf
Ste12DOR	TRUE	FALSE	NA	NA	NA	NA	NA	NA	NA	NA	NA	NA	TRUE	FALSE	NA	NA	NA	NA	NA	NA	NA	NA	NA	NA	NA	0	0	0	0.925301	0	0.46265	Inf	0	0	0	0.150894	0	0.0754471	Inf
Su(Ste):CR42420	FALSE	FALSE	NA	NA	NA	NA	NA	NA	NA	NA	NA	NA	FALSE	FALSE	NA	NA	NA	NA	NA	NA	NA	NA	NA	NA	NA	0	0	0	0.925301	0	0.46265	Inf	0	0	0	0.0883039	0	0.044152	Inf
Su(Ste):CR42427	FALSE	FALSE	NA	NA	NA	NA	NA	NA	NA	NA	NA	NA	FALSE	FALSE	NA	NA	NA	NA	NA	NA	NA	NA	NA	NA	NA	0	3.04561	0	0	0	1.52281	Inf	0	0.601339	0	0	0	0.30067	Inf
tap	TRUE	FALSE	NA	NA	NA	NA	NA	NA	NA	NA	NA	NA	TRUE	FALSE	NA	NA	NA	NA	NA	NA	NA	NA	NA	NA	NA	0	1.0152	0	0.925301	0	0.970253	Inf	0	0.0312446	0	0.0284436	0	0.0298441	Inf
Teh2	TRUE	FALSE	NA	NA	NA	NA	NA	NA	NA	NA	NA	NA	TRUE	FALSE	NA	NA	NA	NA	NA	NA	NA	NA	NA	NA	NA	0	4.45266	0	8.78715	0	6.61991	Inf	0	0.138981	0	0.273946	0	0.206464	Inf
Teh3	TRUE	FALSE	NA	NA	NA	NA	NA	NA	NA	NA	NA	NA	TRUE	FALSE	NA	NA	NA	NA	NA	NA	NA	NA	NA	NA	NA	0	1.30675	0	1.25719	0	1.28197	Inf	0	0.055991	0	0.0538035	0	0.0548972	Inf
Teh4	TRUE	FALSE	NA	NA	NA	NA	NA	NA	NA	NA	NA	NA	TRUE	FALSE	NA	NA	NA	NA	NA	NA	NA	NA	NA	NA	NA	0	1.0152	0	7.40241	0	4.20881	Inf	0	0.0238189	0	0.173469	0	0.0986439	Inf
Tehao	TRUE	FALSE	NA	NA	NA	NA	NA	NA	NA	NA	NA	NA	TRUE	FALSE	NA	NA	NA	NA	NA	NA	NA	NA	NA	NA	NA	0	0	0	3.01104	0	1.50552	Inf	0	0	0	0.0646172	0	0.0323086	Inf
TfIIA-S-2	TRUE	FALSE	NA	NA	NA	NA	NA	NA	NA	NA	NA	NA	TRUE	FALSE	NA	NA	NA	NA	NA	NA	NA	NA	NA	NA	NA	0	4.06082	0	1.8506	0	2.95571	Inf	0	0.917636	0	0.417687	0	0.667661	Inf
tgy	TRUE	FALSE	NA	NA	NA	NA	NA	NA	NA	NA	NA	NA	TRUE	FALSE	NA	NA	NA	NA	NA	NA	NA	NA	NA	NA	NA	0	1.83262	0	1.67033	0	1.75148	Inf	0	0.0867482	0	0.0789716	0	0.0828599	Inf
thetaTry	TRUE	FALSE	NA	NA	NA	NA	NA	NA	NA	NA	NA	NA	TRUE	FALSE	NA	NA	NA	NA	NA	NA	NA	NA	NA	NA	NA	0	0	0	44.4144	0	22.2072	Inf	0	0	0	3.10896	0	1.55448	Inf
Tk	TRUE	FALSE	NA	NA	NA	NA	NA	NA	NA	NA	NA	NA	TRUE	FALSE	NA	NA	NA	NA	NA	NA	NA	NA	NA	NA	NA	0	0	0	4.73041	0	2.36521	Inf	0	0	0	0.202227	0	0.101113	Inf
TkR86C	TRUE	FALSE	NA	NA	NA	NA	NA	NA	NA	NA	NA	NA	TRUE	FALSE	NA	NA	NA	NA	NA	NA	NA	NA	NA	NA	NA	0	0	0	1.03137	0	0.515686	Inf	0	0	0	0.0223271	0	0.0111635	Inf
TkR99D	TRUE	FALSE	NA	NA	NA	NA	NA	NA	NA	NA	NA	NA	TRUE	FALSE	NA	NA	NA	NA	NA	NA	NA	NA	NA	NA	NA	0	0	0	0.927131	0	0.463565	Inf	0	0	0	0.0205271	0	0.0102636	Inf
to	TRUE	FALSE	NA	NA	NA	NA	NA	NA	NA	NA	NA	NA	TRUE	FALSE	NA	NA	NA	NA	NA	NA	NA	NA	NA	NA	NA	0	0	0	2.08772	0	1.04386	Inf	0	0	0	0.130929	0	0.0654647	Inf
TotC	TRUE	FALSE	NA	NA	NA	NA	NA	NA	NA	NA	NA	NA	TRUE	FALSE	NA	NA	NA	NA	NA	NA	NA	NA	NA	NA	NA	0	1.0152	0	11.1036	0	6.05941	Inf	0	0.182279	0	1.99126	0	1.08677	Inf
TpnC25D	TRUE	FALSE	NA	NA	NA	NA	NA	NA	NA	NA	NA	NA	TRUE	FALSE	NA	NA	NA	NA	NA	NA	NA	NA	NA	NA	NA	0	0	0	1.01451	0	0.507256	Inf	0	0	0	0.123151	0	0.0615754	Inf
TpnC4	TRUE	FALSE	NA	NA	NA	NA	NA	NA	NA	NA	NA	NA	TRUE	FALSE	NA	NA	NA	NA	NA	NA	NA	NA	NA	NA	NA	0	0.934769	0	1.70398	0	1.31937	Inf	0	0.092821	0	0.169	0	0.130911	Inf
Traf-like	TRUE	FALSE	NA	NA	NA	NA	NA	NA	NA	NA	NA	NA	TRUE	FALSE	NA	NA	NA	NA	NA	NA	NA	NA	NA	NA	NA	0	3.78927	0	4.60494	0	4.1971	Inf	0	0.111043	0	0.134785	0	0.122914	Inf
Tsp33B	TRUE	FALSE	NA	NA	NA	NA	NA	NA	NA	NA	NA	NA	TRUE	FALSE	NA	NA	NA	NA	NA	NA	NA	NA	NA	NA	NA	0	0	0	0.925301	0	0.46265	Inf	0	0	0	0.0602246	0	0.0301123	Inf
Tsp42Eh	TRUE	FALSE	NA	NA	NA	NA	NA	NA	NA	NA	NA	NA	TRUE	FALSE	NA	NA	NA	NA	NA	NA	NA	NA	NA	NA	NA	0	0	0	0.925301	0	0.46265	Inf	0	0	0	0.0677249	0	0.0338625	Inf
Tsp42Eq	TRUE	FALSE	NA	NA	NA	NA	NA	NA	NA	NA	NA	NA	TRUE	FALSE	NA	NA	NA	NA	NA	NA	NA	NA	NA	NA	NA	0	2.03041	0	5.55181	0	3.79111	Inf	0	0.137434	0	0.375341	0	0.256387	Inf
ttm3	TRUE	FALSE	NA	NA	NA	NA	NA	NA	NA	NA	NA	NA	TRUE	FALSE	NA	NA	NA	NA	NA	NA	NA	NA	NA	NA	NA	0	0	0	1.8506	0	0.925301	Inf	0	0	0	0.12098	0	0.0604899	Inf
TwdlF	TRUE	FALSE	NA	NA	NA	NA	NA	NA	NA	NA	NA	NA	TRUE	FALSE	NA	NA	NA	NA	NA	NA	NA	NA	NA	NA	NA	0	0	0	2.7759	0	1.38795	Inf	0	0	0	0.159049	0	0.0795244	Inf
TwdlT	TRUE	FALSE	NA	NA	NA	NA	NA	NA	NA	NA	NA	NA	TRUE	FALSE	NA	NA	NA	NA	NA	NA	NA	NA	NA	NA	NA	0	0	0	0.925301	0	0.46265	Inf	0	0	0	0.039009	0	0.0195045	Inf
TwdlV	TRUE	FALSE	NA	NA	NA	NA	NA	NA	NA	NA	NA	NA	TRUE	FALSE	NA	NA	NA	NA	NA	NA	NA	NA	NA	NA	NA	0	4.06082	0	2.7759	0	3.41836	Inf	0	0.278035	0	0.189833	0	0.233934	Inf
TwdlW	TRUE	FALSE	NA	NA	NA	NA	NA	NA	NA	NA	NA	NA	TRUE	FALSE	NA	NA	NA	NA	NA	NA	NA	NA	NA	NA	NA	0	0	0	1.8506	0	0.925301	Inf	0	0	0	0.1185	0	0.0592501	Inf
twi	TRUE	FALSE	NA	NA	NA	NA	NA	NA	NA	NA	NA	NA	TRUE	FALSE	NA	NA	NA	NA	NA	NA	NA	NA	NA	NA	NA	0	3.43265	0	0	0	1.71632	Inf	0	0.107482	0	0	0	0.0537411	Inf
Ugt37b1	TRUE	FALSE	NA	NA	NA	NA	NA	NA	NA	NA	NA	NA	TRUE	FALSE	NA	NA	NA	NA	NA	NA	NA	NA	NA	NA	NA	0	0	0	4.6265	0	2.31325	Inf	0	0	0	0.178211	0	0.0891056	Inf
Ugt37c1	TRUE	FALSE	NA	NA	NA	NA	NA	NA	NA	NA	NA	NA	TRUE	FALSE	NA	NA	NA	NA	NA	NA	NA	NA	NA	NA	NA	0	0	0	0.925301	0	0.46265	Inf	0	0	0	0.035573	0	0.0177865	Inf
Ugt86Dj	TRUE	FALSE	NA	NA	NA	NA	NA	NA	NA	NA	NA	NA	TRUE	FALSE	NA	NA	NA	NA	NA	NA	NA	NA	NA	NA	NA	0	1.0152	0	0	0	0.507602	Inf	0	0.0392284	0	0	0	0.0196142	Inf
unsRNA:d-a	FALSE	FALSE	NA	NA	NA	NA	NA	NA	NA	NA	NA	NA	FALSE	FALSE	NA	NA	NA	NA	NA	NA	NA	NA	NA	NA	NA	0	0	0	0.925301	0	0.46265	Inf	0	0	0	1.34176	0	0.670881	Inf
upd2	TRUE	FALSE	NA	NA	NA	NA	NA	NA	NA	NA	NA	NA	TRUE	FALSE	NA	NA	NA	NA	NA	NA	NA	NA	NA	NA	NA	0	2.03041	0	2.7759	0	2.40316	Inf	0	0.0677521	0	0.0925177	0	0.0801349	Inf
vg	TRUE	FALSE	NA	NA	NA	NA	NA	NA	NA	NA	NA	NA	TRUE	FALSE	NA	NA	NA	NA	NA	NA	NA	NA	NA	NA	NA	0	2.03041	0	0	0	1.0152	Inf	0	0.0369689	0	0	0	0.0184844	Inf
Vha100-5	TRUE	FALSE	NA	NA	NA	NA	NA	NA	NA	NA	NA	NA	TRUE	FALSE	NA	NA	NA	NA	NA	NA	NA	NA	NA	NA	NA	0	2.12511	0	31.9592	0	17.0421	Inf	0	0.0485189	0	0.728795	0	0.388657	Inf
Vha16-4	TRUE	FALSE	NA	NA	NA	NA	NA	NA	NA	NA	NA	NA	TRUE	FALSE	NA	NA	NA	NA	NA	NA	NA	NA	NA	NA	NA	0	1.0152	0	0	0	0.507602	Inf	0	0.163951	0	0	0	0.0819757	Inf
Vkor	TRUE	FALSE	NA	NA	NA	NA	NA	NA	NA	NA	NA	NA	TRUE	FALSE	NA	NA	NA	NA	NA	NA	NA	NA	NA	NA	NA	0	0	0	0.925301	0	0.46265	Inf	0	0	0	0.171108	0	0.0855539	Inf
Vsx2	TRUE	FALSE	NA	NA	NA	NA	NA	NA	NA	NA	NA	NA	TRUE	FALSE	NA	NA	NA	NA	NA	NA	NA	NA	NA	NA	NA	0	1.01873	0	0	0	0.509365	Inf	0	0.027945	0	0	0	0.0139725	Inf
wg	TRUE	FALSE	NA	NA	NA	NA	NA	NA	NA	NA	NA	NA	TRUE	FALSE	NA	NA	NA	NA	NA	NA	NA	NA	NA	NA	NA	0	0	0	0.925301	0	0.46265	Inf	0	0	0	0.0201929	0	0.0100964	Inf
Wnt6	TRUE	FALSE	NA	NA	NA	NA	NA	NA	NA	NA	NA	NA	TRUE	FALSE	NA	NA	NA	NA	NA	NA	NA	NA	NA	NA	NA	0	1.01867	0	0.928456	0	0.973561	Inf	0	0.0228708	0	0.0208205	0	0.0218456	Inf
wuc	TRUE	FALSE	NA	NA	NA	NA	NA	NA	NA	NA	NA	NA	TRUE	FALSE	NA	NA	NA	NA	NA	NA	NA	NA	NA	NA	NA	0	0	0	1.01526	0	0.507631	Inf	0	0	0	0.127142	0	0.063571	Inf
XDMR|Drosophila_fruit_fly_genus	FALSE	TRUE	NA	NA	NA	NA	NA	NA	NA	NA	NA	NA	FALSE	TRUE	NA	NA	NA	NA	NA	NA	NA	NA	NA	NA	NA	0	3.04561	0	0.925301	0	1.98546	Inf	0	1.11658	0	0.338827	0	0.727702	Inf
yellow-d	TRUE	FALSE	NA	NA	NA	NA	NA	NA	NA	NA	NA	NA	TRUE	FALSE	NA	NA	NA	NA	NA	NA	NA	NA	NA	NA	NA	0	3.04561	0	5.55181	0	4.29871	Inf	0	0.116624	0	0.212338	0	0.164481	Inf
yellow-e2	TRUE	FALSE	NA	NA	NA	NA	NA	NA	NA	NA	NA	NA	TRUE	FALSE	NA	NA	NA	NA	NA	NA	NA	NA	NA	NA	NA	0	1.0152	0	0	0	0.507602	Inf	0	0.0439747	0	0	0	0.0219874	Inf
yellow-e3	TRUE	FALSE	NA	NA	NA	NA	NA	NA	NA	NA	NA	NA	TRUE	FALSE	NA	NA	NA	NA	NA	NA	NA	NA	NA	NA	NA	0	0	0	1.8506	0	0.925301	Inf	0	0	0	0.09808	0	0.04904	Inf
yip3	TRUE	FALSE	NA	NA	NA	NA	NA	NA	NA	NA	NA	NA	TRUE	FALSE	NA	NA	NA	NA	NA	NA	NA	NA	NA	NA	NA	0	2.825	0	0	0	1.4125	Inf	0	0.204868	0	0	0	0.102434	Inf
yip7	TRUE	FALSE	NA	NA	NA	NA	NA	NA	NA	NA	NA	NA	TRUE	FALSE	NA	NA	NA	NA	NA	NA	NA	NA	NA	NA	NA	0	0	0	952.135	0	476.067	Inf	0	0	0	80.1671	0	40.0836	Inf
Z600	TRUE	FALSE	NA	NA	NA	NA	NA	NA	NA	NA	NA	NA	TRUE	FALSE	NA	NA	NA	NA	NA	NA	NA	NA	NA	NA	NA	0	1.0152	0	0.925301	0	0.970253	Inf	0	0.237538	0	0.216244	0	0.226891	Inf
Zip42C.2	TRUE	FALSE	NA	NA	NA	NA	NA	NA	NA	NA	NA	NA	TRUE	FALSE	NA	NA	NA	NA	NA	NA	NA	NA	NA	NA	NA	0	0	0	1.8506	0	0.925301	Inf	0	0	0	0.101807	0	0.0509034	Inf
Amy-d	TRUE	FALSE	NA	NA	NA	NA	NA	NA	NA	NA	NA	NA	TRUE	FALSE	NA	NA	NA	NA	NA	NA	NA	NA	NA	NA	NA	0	1.51982	5.92802e-05	413.198	2.96401e-05	207.359	22.7381	0	0.0641951	2.49041e-06	17.4321	1.2452e-06	8.74814	22.7442
CG31703	TRUE	FALSE	NA	NA	NA	NA	NA	NA	NA	NA	NA	NA	TRUE	FALSE	NA	NA	NA	NA	NA	NA	NA	NA	NA	NA	NA	0	1.0152	8.56262e-07	4.29645	4.28131e-07	2.65583	22.5646	0	0.0394852	3.31236e-08	0.166906	1.65618e-08	0.103196	22.571
CG6300	TRUE	FALSE	NA	NA	NA	NA	NA	NA	NA	NA	NA	NA	TRUE	FALSE	NA	NA	NA	NA	NA	NA	NA	NA	NA	NA	NA	3.84854e-07	0	0	2.2915	1.92427e-07	1.14575	22.5055	1.4908e-08	0	0	0.089194	7.45401e-09	0.044597	22.5124
Jon99Ciii	TRUE	FALSE	NA	NA	NA	NA	NA	NA	NA	NA	NA	NA	TRUE	FALSE	NA	NA	NA	NA	NA	NA	NA	NA	NA	NA	NA	1.11635	0	0	2397.52	0.558175	1198.76	11.0685	0.0785551	0	0	169.522	0.0392775	84.7612	11.0755
Jon99Cii	TRUE	FALSE	NA	NA	NA	NA	NA	NA	NA	NA	NA	NA	TRUE	FALSE	NA	NA	NA	NA	NA	NA	NA	NA	NA	NA	NA	0	0	1.25477	1377.66	0.627385	688.83	10.1006	0	0	0.111868	123.343	0.0559342	61.6716	10.1067
CG18858	TRUE	FALSE	NA	NA	NA	NA	NA	NA	NA	NA	NA	NA	TRUE	FALSE	NA	NA	NA	NA	NA	NA	NA	NA	NA	NA	NA	0.00332792	35.3894	0.0361478	0.0119154	0.0197379	17.7007	9.80862	0.000114033	1.21994	0.00123936	0.000410255	0.000676698	0.610177	9.8165
LysD	TRUE	FALSE	NA	NA	NA	NA	NA	NA	NA	NA	NA	NA	TRUE	FALSE	NA	NA	NA	NA	NA	NA	NA	NA	NA	NA	NA	0.848397	1.0152	0	755.564	0.424199	378.29	9.80054	0.178359	0.214713	0	159.609	0.0891793	79.912	9.80749
CG12374	TRUE	FALSE	NA	NA	NA	NA	NA	NA	NA	NA	NA	NA	TRUE	FALSE	NA	NA	NA	NA	NA	NA	NA	NA	NA	NA	NA	1.69679	0	1.25477	2069.9	1.47578	1034.95	9.45386	0.0792378	0	0.0586311	97.1278	0.0689344	48.5639	9.46044
Amy-p	TRUE	FALSE	NA	NA	NA	NA	NA	NA	NA	NA	NA	NA	TRUE	FALSE	NA	NA	NA	NA	NA	NA	NA	NA	NA	NA	NA	0	1.56569	1.28752	685.956	0.643758	343.761	9.06067	0	0.0649553	0.0531267	28.4241	0.0265633	14.2445	9.06676
alphaTry	TRUE	FALSE	NA	NA	NA	NA	NA	NA	NA	NA	NA	NA	TRUE	FALSE	NA	NA	NA	NA	NA	NA	NA	NA	NA	NA	NA	0.848397	0	2.50954	911.468	1.67897	455.734	8.08447	0.0758217	0	0.224414	81.8516	0.150118	40.9258	8.09077
Jon99Ci	TRUE	FALSE	NA	NA	NA	NA	NA	NA	NA	NA	NA	NA	TRUE	FALSE	NA	NA	NA	NA	NA	NA	NA	NA	NA	NA	NA	0	0	1.25477	260.01	0.627385	130.005	7.695	0	0	0.104758	21.7993	0.052379	10.8997	7.70108
Jon74E	TRUE	FALSE	NA	NA	NA	NA	NA	NA	NA	NA	NA	NA	TRUE	FALSE	NA	NA	NA	NA	NA	NA	NA	NA	NA	NA	NA	0.662534	1.5856	0.979881	186.996	0.821208	94.2906	6.84322	0.0399983	0.0963023	0.0591926	11.3437	0.0495955	5.72003	6.84967
His1:CG33837	TRUE	FALSE	NA	NA	NA	NA	NA	NA	NA	NA	NA	NA	TRUE	FALSE	NA	NA	NA	NA	NA	NA	NA	NA	NA	NA	NA	1.83344e-06	3.94069e-07	4.9457e-08	0.000203652	9.41448e-07	0.000102023	6.7598	1.31442e-07	2.84217e-08	3.54778e-09	1.46706e-05	6.74948e-08	7.3495e-06	6.76672
His1:CG33840	TRUE	FALSE	NA	NA	NA	NA	NA	NA	NA	NA	NA	NA	TRUE	FALSE	NA	NA	NA	NA	NA	NA	NA	NA	NA	NA	NA	1.83344e-06	3.94069e-07	4.9457e-08	0.000203652	9.41448e-07	0.000102023	6.7598	1.31442e-07	2.84217e-08	3.54778e-09	1.46706e-05	6.74948e-08	7.3495e-06	6.76672
His1:CG33843	TRUE	FALSE	NA	NA	NA	NA	NA	NA	NA	NA	NA	NA	TRUE	FALSE	NA	NA	NA	NA	NA	NA	NA	NA	NA	NA	NA	1.83344e-06	3.94069e-07	4.9457e-08	0.000203652	9.41448e-07	0.000102023	6.7598	1.31442e-07	2.84217e-08	3.54778e-09	1.46706e-05	6.74948e-08	7.3495e-06	6.76672
His1:CG33846	TRUE	FALSE	NA	NA	NA	NA	NA	NA	NA	NA	NA	NA	TRUE	FALSE	NA	NA	NA	NA	NA	NA	NA	NA	NA	NA	NA	1.83344e-06	3.94069e-07	4.9457e-08	0.000203652	9.41448e-07	0.000102023	6.7598	1.31442e-07	2.84217e-08	3.54778e-09	1.46706e-05	6.74948e-08	7.3495e-06	6.76672
His1:CG33849	TRUE	FALSE	NA	NA	NA	NA	NA	NA	NA	NA	NA	NA	TRUE	FALSE	NA	NA	NA	NA	NA	NA	NA	NA	NA	NA	NA	1.83344e-06	3.94069e-07	4.9457e-08	0.000203652	9.41448e-07	0.000102023	6.7598	1.31442e-07	2.84217e-08	3.54778e-09	1.46706e-05	6.74948e-08	7.3495e-06	6.76672
His1:CG33864	TRUE	FALSE	NA	NA	NA	NA	NA	NA	NA	NA	NA	NA	TRUE	FALSE	NA	NA	NA	NA	NA	NA	NA	NA	NA	NA	NA	1.83344e-06	3.94069e-07	4.9457e-08	0.000203652	9.41448e-07	0.000102023	6.7598	1.31442e-07	2.84217e-08	3.54778e-09	1.46706e-05	6.74948e-08	7.3495e-06	6.76672
CG18180	TRUE	FALSE	NA	NA	NA	NA	NA	NA	NA	NA	NA	NA	TRUE	FALSE	NA	NA	NA	NA	NA	NA	NA	NA	NA	NA	NA	0	2.03041	1.25477	92.5301	0.627385	47.2802	6.23574	0	0.171891	0.105653	7.82407	0.0528267	3.99798	6.24186
epsilonTry	TRUE	FALSE	NA	NA	NA	NA	NA	NA	NA	NA	NA	NA	TRUE	FALSE	NA	NA	NA	NA	NA	NA	NA	NA	NA	NA	NA	0.848397	0	2.50954	132.318	1.67897	66.159	5.30029	0.0794265	0	0.235083	12.4474	0.157255	6.22368	5.30659
Mal-A6	TRUE	FALSE	NA	NA	NA	NA	NA	NA	NA	NA	NA	NA	TRUE	FALSE	NA	NA	NA	NA	NA	NA	NA	NA	NA	NA	NA	1.89674	1.83678	3.40533	194.455	2.65104	98.1461	5.2103	0.0592059	0.05768	0.10636	6.09914	0.0827828	3.07841	5.21671
CG3819	TRUE	FALSE	NA	NA	NA	NA	NA	NA	NA	NA	NA	NA	TRUE	FALSE	NA	NA	NA	NA	NA	NA	NA	NA	NA	NA	NA	0.815793	0	0	27.9508	0.407897	13.9754	5.09854	0.0409795	0	0	1.41082	0.0204897	0.705411	5.10549
CG8661	TRUE	FALSE	NA	NA	NA	NA	NA	NA	NA	NA	NA	NA	TRUE	FALSE	NA	NA	NA	NA	NA	NA	NA	NA	NA	NA	NA	0	0	1.25477	37.9373	0.627385	18.9687	4.91812	0	0	0.155165	4.71116	0.0775826	2.35558	4.92421
CG4363	TRUE	FALSE	NA	NA	NA	NA	NA	NA	NA	NA	NA	NA	TRUE	FALSE	NA	NA	NA	NA	NA	NA	NA	NA	NA	NA	NA	0	0	1.25477	35.1614	0.627385	17.5807	4.8085	0	0	0.151986	4.27696	0.0759928	2.13848	4.81458
CG5937	TRUE	FALSE	NA	NA	NA	NA	NA	NA	NA	NA	NA	NA	TRUE	FALSE	NA	NA	NA	NA	NA	NA	NA	NA	NA	NA	NA	2.54763	40.648	1.25601	39.7437	1.90182	40.1959	4.40159	0.0186029	0.298602	0.00917693	0.291611	0.0138899	0.295106	4.40913
CG10592	TRUE	FALSE	NA	NA	NA	NA	NA	NA	NA	NA	NA	NA	TRUE	FALSE	NA	NA	NA	NA	NA	NA	NA	NA	NA	NA	NA	3.39359	3.04561	0	66.6217	1.69679	34.8336	4.3596	0.129336	0.116774	0	2.55134	0.0646682	1.33406	4.36662
CG31086	TRUE	FALSE	NA	NA	NA	NA	NA	NA	NA	NA	NA	NA	TRUE	FALSE	NA	NA	NA	NA	NA	NA	NA	NA	NA	NA	NA	0.417923	0	0	7.20774	0.208962	3.60387	4.10824	0.0477071	0	0	0.826756	0.0238535	0.413378	4.11519
CG43446	TRUE	FALSE	NA	NA	NA	NA	NA	NA	NA	NA	NA	NA	TRUE	FALSE	NA	NA	NA	NA	NA	NA	NA	NA	NA	NA	NA	0.849386	4.06563	0	10.1652	0.424693	7.11543	4.06646	0.0430144	0.207132	0	0.517271	0.0215072	0.362202	4.0739
CG5656	TRUE	FALSE	NA	NA	NA	NA	NA	NA	NA	NA	NA	NA	TRUE	FALSE	NA	NA	NA	NA	NA	NA	NA	NA	NA	NA	NA	0.854014	9.19733	0	4.65713	0.427007	6.92723	4.01995	0.0316001	0.342371	0	0.173155	0.0158001	0.257763	4.02804
CG14245	TRUE	FALSE	NA	NA	NA	NA	NA	NA	NA	NA	NA	NA	TRUE	FALSE	NA	NA	NA	NA	NA	NA	NA	NA	NA	NA	NA	1.33378	14.3642	0	7.27343	0.666892	10.8188	4.01995	0.258332	2.79889	0	1.41554	0.129166	2.10722	4.02804
CG9682	TRUE	FALSE	NA	NA	NA	NA	NA	NA	NA	NA	NA	NA	TRUE	FALSE	NA	NA	NA	NA	NA	NA	NA	NA	NA	NA	NA	0.801296	0	0	12.7801	0.400648	6.39007	3.99542	0.034564	0	0	0.553935	0.017282	0.276967	4.00237
CR44786	FALSE	FALSE	NA	NA	NA	NA	NA	NA	NA	NA	NA	NA	FALSE	FALSE	NA	NA	NA	NA	NA	NA	NA	NA	NA	NA	NA	0.848397	4.06082	0	9.25301	0.424199	6.65691	3.97204	0.0190925	0.0919363	0	0.209237	0.00954624	0.150586	3.97952
mag	TRUE	FALSE	NA	NA	NA	NA	NA	NA	NA	NA	NA	NA	TRUE	FALSE	NA	NA	NA	NA	NA	NA	NA	NA	NA	NA	NA	1.69679	2.03041	0	24.0578	0.848397	13.0441	3.94252	0.0784317	0.0944184	0	1.11741	0.0392159	0.605912	3.9496
CG30016	TRUE	FALSE	NA	NA	NA	NA	NA	NA	NA	NA	NA	NA	TRUE	FALSE	NA	NA	NA	NA	NA	NA	NA	NA	NA	NA	NA	0.848397	4.06082	0	8.32771	0.424199	6.19426	3.86812	0.202911	0.977079	0	2.00135	0.101455	1.48921	3.87563
CG42397	TRUE	FALSE	NA	NA	NA	NA	NA	NA	NA	NA	NA	NA	TRUE	FALSE	NA	NA	NA	NA	NA	NA	NA	NA	NA	NA	NA	0.848397	2.03041	0	9.25301	0.424199	5.64171	3.73332	0.110881	0.266964	0	1.21516	0.0554406	0.741062	3.74058
CG3739	TRUE	FALSE	NA	NA	NA	NA	NA	NA	NA	NA	NA	NA	TRUE	FALSE	NA	NA	NA	NA	NA	NA	NA	NA	NA	NA	NA	0.848397	0	0	11.1036	0.424199	5.55181	3.71015	0.036134	0	0	0.475196	0.018067	0.237598	3.71709
Tsp29Fa	TRUE	FALSE	NA	NA	NA	NA	NA	NA	NA	NA	NA	NA	TRUE	FALSE	NA	NA	NA	NA	NA	NA	NA	NA	NA	NA	NA	0	4.53388	1.40094	13.4302	0.700471	8.98204	3.68065	0	0.315883	0.0970793	0.934587	0.0485397	0.625235	3.68716
Tsp2A	TRUE	FALSE	NA	NA	NA	NA	NA	NA	NA	NA	NA	NA	TRUE	FALSE	NA	NA	NA	NA	NA	NA	NA	NA	NA	NA	NA	0	9.72798	1.33595	6.97836	0.667976	8.35317	3.64446	0	0.763717	0.104316	0.547197	0.052158	0.655457	3.65154
Tsp42Er	TRUE	FALSE	NA	NA	NA	NA	NA	NA	NA	NA	NA	NA	TRUE	FALSE	NA	NA	NA	NA	NA	NA	NA	NA	NA	NA	NA	0.848397	3.04561	0	7.40241	0.424199	5.22401	3.62235	0.0772236	0.278892	0	0.677042	0.0386118	0.477967	3.6298
CG31601	TRUE	FALSE	NA	NA	NA	NA	NA	NA	NA	NA	NA	NA	TRUE	FALSE	NA	NA	NA	NA	NA	NA	NA	NA	NA	NA	NA	0	7.01899	1.2706	8.43276	0.635299	7.72588	3.60419	0	0.188963	0.0340221	0.226753	0.0170111	0.207858	3.61105
CG5150	TRUE	FALSE	NA	NA	NA	NA	NA	NA	NA	NA	NA	NA	TRUE	FALSE	NA	NA	NA	NA	NA	NA	NA	NA	NA	NA	NA	3.4839	6.25333	1.28816	51.4095	2.38603	28.8314	3.59496	0.12553	0.226675	0.0464422	1.8613	0.0859861	1.04399	3.60186
CR45133	FALSE	FALSE	NA	NA	NA	NA	NA	NA	NA	NA	NA	NA	FALSE	FALSE	NA	NA	NA	NA	NA	NA	NA	NA	NA	NA	NA	0	1.8945	0.780519	7.07435	0.390259	4.48443	3.52242	0	0.17124	0.0701688	0.638673	0.0350844	0.404956	3.52886
CG1461	TRUE	FALSE	NA	NA	NA	NA	NA	NA	NA	NA	NA	NA	TRUE	FALSE	NA	NA	NA	NA	NA	NA	NA	NA	NA	NA	NA	0.976255	5.84101	0	5.32374	0.488127	5.58237	3.51555	0.0282354	0.169953	0	0.154717	0.0141177	0.162335	3.5234
DJ-1alpha	TRUE	FALSE	NA	NA	NA	NA	NA	NA	NA	NA	NA	NA	TRUE	FALSE	NA	NA	NA	NA	NA	NA	NA	NA	NA	NA	NA	0.848397	4.06082	0	5.55181	0.424199	4.80631	3.50212	0.0935042	0.450252	0	0.614834	0.0467521	0.532543	3.5098
CG17994	TRUE	FALSE	NA	NA	NA	NA	NA	NA	NA	NA	NA	NA	TRUE	FALSE	NA	NA	NA	NA	NA	NA	NA	NA	NA	NA	NA	0.848397	4.06082	0	5.55181	0.424199	4.80631	3.50212	0.0320652	0.154404	0	0.210843	0.0160326	0.182624	3.5098
CG5255	TRUE	FALSE	NA	NA	NA	NA	NA	NA	NA	NA	NA	NA	TRUE	FALSE	NA	NA	NA	NA	NA	NA	NA	NA	NA	NA	NA	0.848397	4.06082	0	5.55181	0.424199	4.80631	3.50212	0.0700952	0.337531	0	0.460909	0.0350476	0.39922	3.5098
CG12963	TRUE	FALSE	NA	NA	NA	NA	NA	NA	NA	NA	NA	NA	TRUE	FALSE	NA	NA	NA	NA	NA	NA	NA	NA	NA	NA	NA	0.912176	1.33265	0	8.95375	0.456088	5.1432	3.49528	0.0876192	0.12878	0	0.864206	0.0438096	0.496493	3.50245
CG32712	TRUE	FALSE	NA	NA	NA	NA	NA	NA	NA	NA	NA	NA	TRUE	FALSE	NA	NA	NA	NA	NA	NA	NA	NA	NA	NA	NA	0.848397	3.04561	0	6.47711	0.424199	4.76136	3.48856	0.124984	0.451377	0	0.958797	0.0624918	0.705087	3.49606
CG42265	TRUE	FALSE	NA	NA	NA	NA	NA	NA	NA	NA	NA	NA	TRUE	FALSE	NA	NA	NA	NA	NA	NA	NA	NA	NA	NA	NA	0.857154	15.3853	1.26772	8.24349	1.06244	11.8144	3.47509	0.00642617	0.11604	0.00950994	0.0621006	0.00796805	0.0890703	3.48265
CG32483	TRUE	FALSE	NA	NA	NA	NA	NA	NA	NA	NA	NA	NA	TRUE	FALSE	NA	NA	NA	NA	NA	NA	NA	NA	NA	NA	NA	0.848397	1.0152	0	8.32771	0.424199	4.67146	3.46106	0.0423651	0.0510003	0	0.417855	0.0211825	0.234428	3.4682
CG8997	TRUE	FALSE	NA	NA	NA	NA	NA	NA	NA	NA	NA	NA	TRUE	FALSE	NA	NA	NA	NA	NA	NA	NA	NA	NA	NA	NA	1.13408	0	0	12.3688	0.567042	6.18442	3.44711	0.0730585	0	0	0.800656	0.0365292	0.400328	3.45406
Syt14	TRUE	FALSE	NA	NA	NA	NA	NA	NA	NA	NA	NA	NA	TRUE	FALSE	NA	NA	NA	NA	NA	NA	NA	NA	NA	NA	NA	1.17232	16.2433	1.25477	10.1783	1.21355	13.2108	3.44442	0.0272972	0.380502	0.0292346	0.238144	0.0282659	0.309323	3.45198
Oatp58Dc	TRUE	FALSE	NA	NA	NA	NA	NA	NA	NA	NA	NA	NA	TRUE	FALSE	NA	NA	NA	NA	NA	NA	NA	NA	NA	NA	NA	1.67185	9.13684	0	9.03372	0.835925	9.08528	3.44209	0.0350842	0.192895	0	0.19049	0.0175421	0.191692	3.4499
CG4301	TRUE	FALSE	NA	NA	NA	NA	NA	NA	NA	NA	NA	NA	TRUE	FALSE	NA	NA	NA	NA	NA	NA	NA	NA	NA	NA	NA	1.63653	4.95681	0	12.333	0.818265	8.64493	3.40121	0.0213176	0.0649573	0	0.161427	0.0106588	0.113192	3.40866
CG4830	TRUE	FALSE	NA	NA	NA	NA	NA	NA	NA	NA	NA	NA	TRUE	FALSE	NA	NA	NA	NA	NA	NA	NA	NA	NA	NA	NA	0	3.04561	1.25477	10.1783	0.627385	6.61196	3.39766	0	0.108905	0.0446259	0.363521	0.022313	0.236213	3.40413
CG43139	TRUE	FALSE	NA	NA	NA	NA	NA	NA	NA	NA	NA	NA	TRUE	FALSE	NA	NA	NA	NA	NA	NA	NA	NA	NA	NA	NA	0.707346	5.08026	0	2.31154	0.353673	3.6959	3.38544	0.124363	0.898579	0	0.40837	0.0621817	0.653475	3.39357
CG13771	TRUE	FALSE	NA	NA	NA	NA	NA	NA	NA	NA	NA	NA	TRUE	FALSE	NA	NA	NA	NA	NA	NA	NA	NA	NA	NA	NA	0.849718	5.084	0	3.707	0.424859	4.3955	3.37097	0.0408097	0.245643	0	0.178897	0.0204048	0.21227	3.37892
CR45335	FALSE	FALSE	NA	NA	NA	NA	NA	NA	NA	NA	NA	NA	FALSE	FALSE	NA	NA	NA	NA	NA	NA	NA	NA	NA	NA	NA	0.848397	5.07602	0	3.7012	0.424199	4.38861	3.37095	0.051403	0.309402	0	0.225333	0.0257015	0.267368	3.3789
CG8958	TRUE	FALSE	NA	NA	NA	NA	NA	NA	NA	NA	NA	NA	TRUE	FALSE	NA	NA	NA	NA	NA	NA	NA	NA	NA	NA	NA	0.848397	3.04561	0	5.55181	0.424199	4.29871	3.34109	0.0277354	0.100166	0	0.182373	0.0138677	0.141269	3.34865
Ptx1	TRUE	FALSE	NA	NA	NA	NA	NA	NA	NA	NA	NA	NA	TRUE	FALSE	NA	NA	NA	NA	NA	NA	NA	NA	NA	NA	NA	0.848397	3.04561	0	5.55181	0.424199	4.29871	3.34109	0.0177345	0.064048	0	0.116613	0.00886726	0.0903304	3.34865
CG43777	TRUE	FALSE	NA	NA	NA	NA	NA	NA	NA	NA	NA	NA	TRUE	FALSE	NA	NA	NA	NA	NA	NA	NA	NA	NA	NA	NA	0	1.31004	0.267017	1.38795	0.133509	1.349	3.33688	0	0.0441857	0.00895751	0.0467577	0.00447875	0.0454717	3.3438
CG42780	TRUE	FALSE	NA	NA	NA	NA	NA	NA	NA	NA	NA	NA	TRUE	FALSE	NA	NA	NA	NA	NA	NA	NA	NA	NA	NA	NA	1.70101	5.08866	0	12.0588	0.850506	8.57375	3.33353	0.167058	0.502776	0	1.19003	0.083529	0.846402	3.34099
Npc2f	TRUE	FALSE	NA	NA	NA	NA	NA	NA	NA	NA	NA	NA	TRUE	FALSE	NA	NA	NA	NA	NA	NA	NA	NA	NA	NA	NA	0	4.06082	1.25477	8.32771	0.627385	6.19426	3.30351	0	0.470439	0.144579	0.9636	0.0722894	0.717019	3.31016
vnd	TRUE	FALSE	NA	NA	NA	NA	NA	NA	NA	NA	NA	NA	TRUE	FALSE	NA	NA	NA	NA	NA	NA	NA	NA	NA	NA	NA	0.905127	1.91066	0	6.96582	0.452563	4.43824	3.2938	0.0176845	0.0375557	0	0.136756	0.00884223	0.0871558	3.30111
CG7992	TRUE	FALSE	NA	NA	NA	NA	NA	NA	NA	NA	NA	NA	TRUE	FALSE	NA	NA	NA	NA	NA	NA	NA	NA	NA	NA	NA	0	3.04561	1.25477	9.25301	0.627385	6.14931	3.293	0	0.121151	0.0496441	0.367635	0.0248221	0.244393	3.29951
CG6484	TRUE	FALSE	NA	NA	NA	NA	NA	NA	NA	NA	NA	NA	TRUE	FALSE	NA	NA	NA	NA	NA	NA	NA	NA	NA	NA	NA	1.69679	1.0152	5.01908	64.7711	3.35794	32.8931	3.29214	0.0720602	0.0433741	0.213281	2.76401	0.14267	1.40369	3.29847
spirit	TRUE	FALSE	NA	NA	NA	NA	NA	NA	NA	NA	NA	NA	TRUE	FALSE	NA	NA	NA	NA	NA	NA	NA	NA	NA	NA	NA	0	4.00846	1.28365	8.51936	0.641824	6.26391	3.28681	0	0.172875	0.0550619	0.36698	0.0275309	0.269928	3.29345
et	TRUE	FALSE	NA	NA	NA	NA	NA	NA	NA	NA	NA	NA	TRUE	FALSE	NA	NA	NA	NA	NA	NA	NA	NA	NA	NA	NA	1.71127	10.0669	0	6.53235	0.855633	8.29963	3.27798	0.0462128	0.273496	0	0.177258	0.0231064	0.225377	3.28598
CG14932	TRUE	FALSE	NA	NA	NA	NA	NA	NA	NA	NA	NA	NA	TRUE	FALSE	NA	NA	NA	NA	NA	NA	NA	NA	NA	NA	NA	2.63226	13.7578	1.2977	23.9239	1.96498	18.8408	3.26128	0.26378	1.38698	0.130121	2.409	0.19695	1.89799	3.26857
CG5948	TRUE	FALSE	NA	NA	NA	NA	NA	NA	NA	NA	NA	NA	TRUE	FALSE	NA	NA	NA	NA	NA	NA	NA	NA	NA	NA	NA	0.850064	8.13767	0	0	0.425032	4.06884	3.25897	0.0669108	0.644399	0	0	0.0334554	0.3222	3.26764
Lsp1alpha	TRUE	FALSE	NA	NA	NA	NA	NA	NA	NA	NA	NA	NA	TRUE	FALSE	NA	NA	NA	NA	NA	NA	NA	NA	NA	NA	NA	0.848397	8.12164	0	0	0.424199	4.06082	3.25896	0.0206586	0.198955	0	0	0.0103293	0.0994777	3.26763
CG11598	TRUE	FALSE	NA	NA	NA	NA	NA	NA	NA	NA	NA	NA	TRUE	FALSE	NA	NA	NA	NA	NA	NA	NA	NA	NA	NA	NA	0.926983	4.06082	0	4.79996	0.463491	4.43039	3.25682	0.0522024	0.230061	0	0.271612	0.0261012	0.250836	3.26456
lz	TRUE	FALSE	NA	NA	NA	NA	NA	NA	NA	NA	NA	NA	TRUE	FALSE	NA	NA	NA	NA	NA	NA	NA	NA	NA	NA	NA	0	8.63611	1.33314	3.93237	0.66657	6.28424	3.23691	0	0.166232	0.0255224	0.0756017	0.0127612	0.120917	3.24418
CG8837	TRUE	FALSE	NA	NA	NA	NA	NA	NA	NA	NA	NA	NA	TRUE	FALSE	NA	NA	NA	NA	NA	NA	NA	NA	NA	NA	NA	0.849011	6.09577	0	1.85196	0.424505	3.97386	3.22669	0.0306284	0.221233	0	0.067133	0.0153142	0.144183	3.23496
Desat2	TRUE	FALSE	NA	NA	NA	NA	NA	NA	NA	NA	NA	NA	TRUE	FALSE	NA	NA	NA	NA	NA	NA	NA	NA	NA	NA	NA	0.848397	4.06082	0	3.7012	0.424199	3.88101	3.19362	0.0432797	0.208406	0	0.189723	0.0216399	0.199064	3.20147
CG42260	TRUE	FALSE	NA	NA	NA	NA	NA	NA	NA	NA	NA	NA	TRUE	FALSE	NA	NA	NA	NA	NA	NA	NA	NA	NA	NA	NA	2.83544	14.2129	0	11.5967	1.41772	12.9048	3.18626	0.0283752	0.143091	0	0.116613	0.0141876	0.129852	3.19416
CG14778	TRUE	FALSE	NA	NA	NA	NA	NA	NA	NA	NA	NA	NA	TRUE	FALSE	NA	NA	NA	NA	NA	NA	NA	NA	NA	NA	NA	0.848397	3.04561	0	4.6265	0.424199	3.83606	3.17681	0.0904661	0.326717	0	0.495714	0.045233	0.411216	3.18445
CG32572	TRUE	FALSE	NA	NA	NA	NA	NA	NA	NA	NA	NA	NA	TRUE	FALSE	NA	NA	NA	NA	NA	NA	NA	NA	NA	NA	NA	0.848397	3.04561	0	4.6265	0.424199	3.83606	3.17681	0.0242701	0.0876512	0	0.132989	0.0121351	0.11032	3.18445
CG17681	TRUE	FALSE	NA	NA	NA	NA	NA	NA	NA	NA	NA	NA	TRUE	FALSE	NA	NA	NA	NA	NA	NA	NA	NA	NA	NA	NA	0	2.03041	1.25477	9.25301	0.627385	5.64171	3.16871	0	0.111419	0.0684842	0.507154	0.0342421	0.309287	3.1751
Ugt86Dd	TRUE	FALSE	NA	NA	NA	NA	NA	NA	NA	NA	NA	NA	TRUE	FALSE	NA	NA	NA	NA	NA	NA	NA	NA	NA	NA	NA	1.69679	4.06082	0	11.1036	0.848397	7.58221	3.15981	0.0680949	0.163949	0	0.447756	0.0340475	0.305853	3.16722
Mal-A4	TRUE	FALSE	NA	NA	NA	NA	NA	NA	NA	NA	NA	NA	TRUE	FALSE	NA	NA	NA	NA	NA	NA	NA	NA	NA	NA	NA	0.848397	0	0	7.40241	0.424199	3.7012	3.12518	0.0315802	0	0	0.276873	0.0157901	0.138437	3.13213
CG43776	TRUE	FALSE	NA	NA	NA	NA	NA	NA	NA	NA	NA	NA	TRUE	FALSE	NA	NA	NA	NA	NA	NA	NA	NA	NA	NA	NA	0	1.19178	0.342637	1.78102	0.171318	1.4864	3.11707	0	0.0313256	0.00895751	0.0467577	0.00447875	0.0390416	3.12384
CG3544	TRUE	FALSE	NA	NA	NA	NA	NA	NA	NA	NA	NA	NA	TRUE	FALSE	NA	NA	NA	NA	NA	NA	NA	NA	NA	NA	NA	0.589799	1.80787	0	3.29554	0.294899	2.5517	3.11316	0.0120475	0.0371511	0	0.0676413	0.00602376	0.0523962	3.12072
CG43326	TRUE	FALSE	NA	NA	NA	NA	NA	NA	NA	NA	NA	NA	TRUE	FALSE	NA	NA	NA	NA	NA	NA	NA	NA	NA	NA	NA	1.72095	12.4403	0	2.26772	0.860475	7.354	3.09532	0.15713	1.1427	0	0.208052	0.0785651	0.675376	3.10373
CG31106	TRUE	FALSE	NA	NA	NA	NA	NA	NA	NA	NA	NA	NA	TRUE	FALSE	NA	NA	NA	NA	NA	NA	NA	NA	NA	NA	NA	0.848397	6.09123	0	0.925301	0.424199	3.50826	3.04795	0.0339322	0.245091	0	0.0371867	0.0169661	0.141139	3.05639
brv3	TRUE	FALSE	NA	NA	NA	NA	NA	NA	NA	NA	NA	NA	TRUE	FALSE	NA	NA	NA	NA	NA	NA	NA	NA	NA	NA	NA	0	4.14926	1.2821	6.34192	0.641049	5.24559	3.0326	0	0.113037	0.0347392	0.172564	0.0173696	0.1428	3.03936
Ppm1	TRUE	FALSE	NA	NA	NA	NA	NA	NA	NA	NA	NA	NA	TRUE	FALSE	NA	NA	NA	NA	NA	NA	NA	NA	NA	NA	NA	0.848397	5.07602	0	1.8506	0.424199	3.46331	3.02934	0.0409795	0.246661	0	0.0898197	0.0204897	0.168241	3.03755
CG1139	TRUE	FALSE	NA	NA	NA	NA	NA	NA	NA	NA	NA	NA	TRUE	FALSE	NA	NA	NA	NA	NA	NA	NA	NA	NA	NA	NA	0.848397	5.07602	0	1.8506	0.424199	3.46331	3.02934	0.0363436	0.218758	0	0.0796588	0.0181718	0.149208	3.03755
CG14052	TRUE	FALSE	NA	NA	NA	NA	NA	NA	NA	NA	NA	NA	TRUE	FALSE	NA	NA	NA	NA	NA	NA	NA	NA	NA	NA	NA	0.848397	5.07602	0	1.8506	0.424199	3.46331	3.02934	0.0722163	0.43468	0	0.158285	0.0361081	0.296483	3.03755
spok	TRUE	FALSE	NA	NA	NA	NA	NA	NA	NA	NA	NA	NA	TRUE	FALSE	NA	NA	NA	NA	NA	NA	NA	NA	NA	NA	NA	0.848397	5.07602	0	1.8506	0.424199	3.46331	3.02934	0.0319629	0.192389	0	0.070057	0.0159815	0.131223	3.03755
CG16719	TRUE	FALSE	NA	NA	NA	NA	NA	NA	NA	NA	NA	NA	TRUE	FALSE	NA	NA	NA	NA	NA	NA	NA	NA	NA	NA	NA	0.848397	4.06082	0	2.7759	0.424199	3.41836	3.01049	0.0568876	0.273932	0	0.187031	0.0284438	0.230482	3.01847
CG5458	TRUE	FALSE	NA	NA	NA	NA	NA	NA	NA	NA	NA	NA	TRUE	FALSE	NA	NA	NA	NA	NA	NA	NA	NA	NA	NA	NA	0.848397	4.06082	0	2.7759	0.424199	3.41836	3.01049	0.0471476	0.227031	0	0.155009	0.0235738	0.19102	3.01847
CG31028	TRUE	FALSE	NA	NA	NA	NA	NA	NA	NA	NA	NA	NA	TRUE	FALSE	NA	NA	NA	NA	NA	NA	NA	NA	NA	NA	NA	0.848397	3.04561	0	3.7012	0.424199	3.37341	2.9914	0.014015	0.0506151	0	0.0614369	0.00700751	0.056026	2.99912
CG6499	TRUE	FALSE	NA	NA	NA	NA	NA	NA	NA	NA	NA	NA	TRUE	FALSE	NA	NA	NA	NA	NA	NA	NA	NA	NA	NA	NA	0.848397	3.04561	0	3.7012	0.424199	3.37341	2.9914	0.0318411	0.114994	0	0.13958	0.0159205	0.127287	2.99912
ktub	TRUE	FALSE	NA	NA	NA	NA	NA	NA	NA	NA	NA	NA	TRUE	FALSE	NA	NA	NA	NA	NA	NA	NA	NA	NA	NA	NA	0.853383	3.06351	0	3.6797	0.426692	3.37161	2.98217	0.0218188	0.0787983	0	0.0945347	0.0109094	0.0866665	2.9899
CG7720	TRUE	FALSE	NA	NA	NA	NA	NA	NA	NA	NA	NA	NA	TRUE	FALSE	NA	NA	NA	NA	NA	NA	NA	NA	NA	NA	NA	2.67611	22.4159	2.63863	19.4394	2.65737	20.9277	2.97734	0.0675442	0.569182	0.0666381	0.493013	0.0670911	0.531097	2.98478
CG12507	TRUE	FALSE	NA	NA	NA	NA	NA	NA	NA	NA	NA	NA	TRUE	FALSE	NA	NA	NA	NA	NA	NA	NA	NA	NA	NA	NA	0.848397	2.03041	0	4.6265	0.424199	3.32846	2.97204	0.0558729	0.134523	0	0.306159	0.0279365	0.220341	2.97952
CG31021	TRUE	FALSE	NA	NA	NA	NA	NA	NA	NA	NA	NA	NA	TRUE	FALSE	NA	NA	NA	NA	NA	NA	NA	NA	NA	NA	NA	0.848397	2.03041	0	4.6265	0.424199	3.32846	2.97204	0.0386414	0.0930353	0	0.211738	0.0193207	0.152386	2.97952
CG4970	TRUE	FALSE	NA	NA	NA	NA	NA	NA	NA	NA	NA	NA	TRUE	FALSE	NA	NA	NA	NA	NA	NA	NA	NA	NA	NA	NA	0.848397	2.03041	0	4.6265	0.424199	3.32846	2.97204	0.0247129	0.0595003	0	0.135416	0.0123565	0.097458	2.97952
Smyd4	TRUE	FALSE	NA	NA	NA	NA	NA	NA	NA	NA	NA	NA	TRUE	FALSE	NA	NA	NA	NA	NA	NA	NA	NA	NA	NA	NA	0.848397	2.03041	0	4.6265	0.424199	3.32846	2.97204	0.0254923	0.0613767	0	0.139686	0.0127461	0.100531	2.97952
IM10	TRUE	FALSE	NA	NA	NA	NA	NA	NA	NA	NA	NA	NA	TRUE	FALSE	NA	NA	NA	NA	NA	NA	NA	NA	NA	NA	NA	0.322379	4.82775	0.841448	4.26435	0.581914	4.54605	2.96574	0.0228484	0.344227	0.0596729	0.303692	0.0412607	0.323959	2.97297
pre-mod(mdg4)-K	TRUE	FALSE	NA	NA	NA	NA	NA	NA	NA	NA	NA	NA	TRUE	FALSE	NA	NA	NA	NA	NA	NA	NA	NA	NA	NA	NA	0	0	5.69435	44.1958	2.84717	22.0979	2.95631	0	0	0.0954586	0.744017	0.0477293	0.372009	2.96239
Gsc	TRUE	FALSE	NA	NA	NA	NA	NA	NA	NA	NA	NA	NA	TRUE	FALSE	NA	NA	NA	NA	NA	NA	NA	NA	NA	NA	NA	0.848397	1.0152	0	5.55181	0.424199	3.2835	2.95242	0.0231705	0.0278933	0	0.152357	0.0115852	0.0901251	2.95964
nAChRalpha1	TRUE	FALSE	NA	NA	NA	NA	NA	NA	NA	NA	NA	NA	TRUE	FALSE	NA	NA	NA	NA	NA	NA	NA	NA	NA	NA	NA	0	1.36023	0.420303	1.85093	0.210152	1.60558	2.93359	0	0.0222878	0.00684965	0.0302919	0.00342483	0.0262899	2.94041
CG4781	TRUE	FALSE	NA	NA	NA	NA	NA	NA	NA	NA	NA	NA	TRUE	FALSE	NA	NA	NA	NA	NA	NA	NA	NA	NA	NA	NA	0.848397	0	0	6.47711	0.424199	3.23855	2.93254	0.0369056	0	0	0.283117	0.0184528	0.141559	2.93949
CG34288	TRUE	FALSE	NA	NA	NA	NA	NA	NA	NA	NA	NA	NA	TRUE	FALSE	NA	NA	NA	NA	NA	NA	NA	NA	NA	NA	NA	0	3.04561	1.25477	6.47711	0.627385	4.76136	2.92395	0	0.76373	0.312953	1.62228	0.156477	1.19301	2.93058
CG44014	TRUE	FALSE	NA	NA	NA	NA	NA	NA	NA	NA	NA	NA	TRUE	FALSE	NA	NA	NA	NA	NA	NA	NA	NA	NA	NA	NA	0	3.04561	1.25477	6.47711	0.627385	4.76136	2.92395	0	0.279754	0.114635	0.594243	0.0573174	0.436999	2.93058
CG9903	TRUE	FALSE	NA	NA	NA	NA	NA	NA	NA	NA	NA	NA	TRUE	FALSE	NA	NA	NA	NA	NA	NA	NA	NA	NA	NA	NA	0	3.04561	1.25477	6.47711	0.627385	4.76136	2.92395	0	0.126662	0.0519022	0.26905	0.0259511	0.197856	2.93058
CG11659	TRUE	FALSE	NA	NA	NA	NA	NA	NA	NA	NA	NA	NA	TRUE	FALSE	NA	NA	NA	NA	NA	NA	NA	NA	NA	NA	NA	0.848397	4.06082	0	2.335	0.424198	3.19791	2.91432	0.0332788	0.160248	0	0.0920337	0.0166394	0.126141	2.92236
b	TRUE	FALSE	NA	NA	NA	NA	NA	NA	NA	NA	NA	NA	TRUE	FALSE	NA	NA	NA	NA	NA	NA	NA	NA	NA	NA	NA	0	2.03041	1.25477	7.40241	0.627385	4.71641	2.91027	0	0.0660463	0.0405956	0.240502	0.0202978	0.153274	2.91672
CG43386	TRUE	FALSE	NA	NA	NA	NA	NA	NA	NA	NA	NA	NA	TRUE	FALSE	NA	NA	NA	NA	NA	NA	NA	NA	NA	NA	NA	0.848397	4.30236	0	1.8506	0.424199	3.07648	2.85847	0.0598782	0.305483	0	0.131242	0.0299391	0.218363	2.86662
CG15546	TRUE	FALSE	NA	NA	NA	NA	NA	NA	NA	NA	NA	NA	TRUE	FALSE	NA	NA	NA	NA	NA	NA	NA	NA	NA	NA	NA	0	5.07602	1.25477	3.7012	0.627385	4.38861	2.80634	0	0.18587	0.0456983	0.135366	0.0228491	0.160618	2.81342
Prosbeta2R2	TRUE	FALSE	NA	NA	NA	NA	NA	NA	NA	NA	NA	NA	TRUE	FALSE	NA	NA	NA	NA	NA	NA	NA	NA	NA	NA	NA	0	5.07602	1.25477	3.7012	0.627385	4.38861	2.80634	0	0.269346	0.0662218	0.19616	0.0331109	0.232753	2.81342
5-HT2A	TRUE	FALSE	NA	NA	NA	NA	NA	NA	NA	NA	NA	NA	TRUE	FALSE	NA	NA	NA	NA	NA	NA	NA	NA	NA	NA	NA	0.992218	6.35004	1.46748	10.8216	1.22985	8.58581	2.80347	0.0168237	0.108318	0.024897	0.184373	0.0208603	0.146345	2.81054
CG12984	TRUE	FALSE	NA	NA	NA	NA	NA	NA	NA	NA	NA	NA	TRUE	FALSE	NA	NA	NA	NA	NA	NA	NA	NA	NA	NA	NA	1.61847	7.74673	0	3.53035	0.809234	5.63854	2.80069	0.225761	1.08711	0	0.494827	0.11288	0.790968	2.80883
CG11671	TRUE	FALSE	NA	NA	NA	NA	NA	NA	NA	NA	NA	NA	TRUE	FALSE	NA	NA	NA	NA	NA	NA	NA	NA	NA	NA	NA	0	4.06082	1.25477	4.6265	0.627385	4.34366	2.79149	0	0.500696	0.153878	0.569764	0.0769388	0.53523	2.79838
CG13082	TRUE	FALSE	NA	NA	NA	NA	NA	NA	NA	NA	NA	NA	TRUE	FALSE	NA	NA	NA	NA	NA	NA	NA	NA	NA	NA	NA	0	4.06082	1.25477	4.6265	0.627385	4.34366	2.79149	0	0.216055	0.0663996	0.245859	0.0331998	0.230957	2.79838
CG6974	TRUE	FALSE	NA	NA	NA	NA	NA	NA	NA	NA	NA	NA	TRUE	FALSE	NA	NA	NA	NA	NA	NA	NA	NA	NA	NA	NA	0.848397	3.04561	0	2.7759	0.424199	2.91076	2.77858	0.0899788	0.324957	0	0.295826	0.0449894	0.310392	2.78643
CR45573	FALSE	FALSE	NA	NA	NA	NA	NA	NA	NA	NA	NA	NA	FALSE	FALSE	NA	NA	NA	NA	NA	NA	NA	NA	NA	NA	NA	0.848397	3.04561	0	2.7759	0.424199	2.91076	2.77858	0.015652	0.056527	0	0.0514596	0.007826	0.0539933	2.78643
fln	TRUE	FALSE	NA	NA	NA	NA	NA	NA	NA	NA	NA	NA	TRUE	FALSE	NA	NA	NA	NA	NA	NA	NA	NA	NA	NA	NA	0	4.55067	1.40613	5.01227	0.703065	4.78147	2.76572	0	0.291115	0.0894675	0.320261	0.0447337	0.305688	2.77262
CG4623	TRUE	FALSE	NA	NA	NA	NA	NA	NA	NA	NA	NA	NA	TRUE	FALSE	NA	NA	NA	NA	NA	NA	NA	NA	NA	NA	NA	1.80414	6.47658	0	5.73776	0.902069	6.10717	2.75919	0.0763992	0.275915	0	0.244148	0.0381996	0.260031	2.76706
CG13627	TRUE	FALSE	NA	NA	NA	NA	NA	NA	NA	NA	NA	NA	TRUE	FALSE	NA	NA	NA	NA	NA	NA	NA	NA	NA	NA	NA	0.905749	2.16767	0	3.95141	0.452875	3.05954	2.75613	0.0241998	0.0582649	0	0.106083	0.0120999	0.0821741	2.76369
CG8568	TRUE	FALSE	NA	NA	NA	NA	NA	NA	NA	NA	NA	NA	TRUE	FALSE	NA	NA	NA	NA	NA	NA	NA	NA	NA	NA	NA	0.848397	2.03041	0	3.7012	0.424199	2.86581	2.75613	0.0204729	0.0492919	0	0.0897461	0.0102365	0.069519	2.76369
Oatp58Da	TRUE	FALSE	NA	NA	NA	NA	NA	NA	NA	NA	NA	NA	TRUE	FALSE	NA	NA	NA	NA	NA	NA	NA	NA	NA	NA	NA	0.848397	2.03041	0	3.7012	0.424199	2.86581	2.75613	0.0255182	0.0614392	0	0.111863	0.0127591	0.086651	2.76369
CG42249	TRUE	FALSE	NA	NA	NA	NA	NA	NA	NA	NA	NA	NA	TRUE	FALSE	NA	NA	NA	NA	NA	NA	NA	NA	NA	NA	NA	0.849238	2.03041	3.7674	28.6868	2.30832	15.3586	2.73414	0.0309485	0.0744396	0.137377	1.05047	0.0841625	0.562456	2.74049
CG5697	TRUE	FALSE	NA	NA	NA	NA	NA	NA	NA	NA	NA	NA	TRUE	FALSE	NA	NA	NA	NA	NA	NA	NA	NA	NA	NA	NA	0	4.30836	1.33126	4.29184	0.665629	4.3001	2.69158	0	0.350268	0.107647	0.348508	0.0538234	0.349388	2.69852
Ets21C	TRUE	FALSE	NA	NA	NA	NA	NA	NA	NA	NA	NA	NA	TRUE	FALSE	NA	NA	NA	NA	NA	NA	NA	NA	NA	NA	NA	1.4856	7.85574	1.38707	10.2287	1.43634	9.0422	2.65428	0.0356965	0.189898	0.033349	0.246963	0.0345227	0.218431	2.66156
CG13227	TRUE	FALSE	NA	NA	NA	NA	NA	NA	NA	NA	NA	NA	TRUE	FALSE	NA	NA	NA	NA	NA	NA	NA	NA	NA	NA	NA	0	5.07602	1.25477	2.7759	0.627385	3.92596	2.64562	0	0.989088	0.243179	0.540252	0.121589	0.76467	2.65282
AstC-R1	TRUE	FALSE	NA	NA	NA	NA	NA	NA	NA	NA	NA	NA	TRUE	FALSE	NA	NA	NA	NA	NA	NA	NA	NA	NA	NA	NA	0	5.07602	1.25477	2.7759	0.627385	3.92596	2.64562	0	0.111193	0.0273381	0.0607349	0.013669	0.0859639	2.65282
CG34382	TRUE	FALSE	NA	NA	NA	NA	NA	NA	NA	NA	NA	NA	TRUE	FALSE	NA	NA	NA	NA	NA	NA	NA	NA	NA	NA	NA	0	5.29773	1.30959	2.89712	0.654793	4.09743	2.64561	0	0.113436	0.0278898	0.0619597	0.0139449	0.0876979	2.6528
CG16898	TRUE	FALSE	NA	NA	NA	NA	NA	NA	NA	NA	NA	NA	TRUE	FALSE	NA	NA	NA	NA	NA	NA	NA	NA	NA	NA	NA	0	4.06082	1.25477	3.7012	0.627385	3.88101	2.62901	0	0.214328	0.0658689	0.195115	0.0329345	0.204722	2.63599
MsR2	TRUE	FALSE	NA	NA	NA	NA	NA	NA	NA	NA	NA	NA	TRUE	FALSE	NA	NA	NA	NA	NA	NA	NA	NA	NA	NA	NA	0.963975	4.06082	0	1.8506	0.481988	2.95571	2.61644	0.0209435	0.0887579	0	0.0404006	0.0104717	0.0645793	2.62457
RpS10a	TRUE	FALSE	NA	NA	NA	NA	NA	NA	NA	NA	NA	NA	TRUE	FALSE	NA	NA	NA	NA	NA	NA	NA	NA	NA	NA	NA	0	3.04561	1.25477	4.6265	0.627385	3.83606	2.6122	0	0.446919	0.183134	0.678091	0.0915668	0.562505	2.61897
NPFR	TRUE	FALSE	NA	NA	NA	NA	NA	NA	NA	NA	NA	NA	TRUE	FALSE	NA	NA	NA	NA	NA	NA	NA	NA	NA	NA	NA	1.73515	6.22892	0	4.20666	0.867575	5.21779	2.58838	0.0448682	0.162041	0	0.109303	0.0224341	0.135672	2.59636
CR42743	FALSE	FALSE	NA	NA	NA	NA	NA	NA	NA	NA	NA	NA	FALSE	FALSE	NA	NA	NA	NA	NA	NA	NA	NA	NA	NA	NA	0	3.31621	1.61809	6.32074	0.809047	4.81847	2.57428	0	0.114052	0.0553495	0.217125	0.0276747	0.165588	2.58096
Lsp1beta	TRUE	FALSE	NA	NA	NA	NA	NA	NA	NA	NA	NA	NA	TRUE	FALSE	NA	NA	NA	NA	NA	NA	NA	NA	NA	NA	NA	0.873786	9.8654	2.58464	10.4829	1.72921	10.1741	2.55672	0.0208303	0.236601	0.0616527	0.25111	0.0412415	0.243855	2.56386
CG10793	TRUE	FALSE	NA	NA	NA	NA	NA	NA	NA	NA	NA	NA	TRUE	FALSE	NA	NA	NA	NA	NA	NA	NA	NA	NA	NA	NA	0.848397	4.06082	0	0.925301	0.424199	2.49306	2.55511	0.0343273	0.165297	0	0.0376197	0.0171636	0.101458	2.56346
CG3257	TRUE	FALSE	NA	NA	NA	NA	NA	NA	NA	NA	NA	NA	TRUE	FALSE	NA	NA	NA	NA	NA	NA	NA	NA	NA	NA	NA	0.848397	3.04561	0	1.8506	0.424199	2.44811	2.52886	0.01848	0.0667403	0	0.0405049	0.00924	0.0536226	2.53688
CG5549	TRUE	FALSE	NA	NA	NA	NA	NA	NA	NA	NA	NA	NA	TRUE	FALSE	NA	NA	NA	NA	NA	NA	NA	NA	NA	NA	NA	0.848397	3.04561	0	1.8506	0.424199	2.44811	2.52886	0.00813335	0.0293735	0	0.0178269	0.00406667	0.0236002	2.53688
CR45124	FALSE	FALSE	NA	NA	NA	NA	NA	NA	NA	NA	NA	NA	FALSE	FALSE	NA	NA	NA	NA	NA	NA	NA	NA	NA	NA	NA	0.848397	3.04561	0	1.8506	0.424199	2.44811	2.52886	0.152336	0.55016	0	0.333894	0.0761681	0.442027	2.53688
CG17601	TRUE	FALSE	NA	NA	NA	NA	NA	NA	NA	NA	NA	NA	TRUE	FALSE	NA	NA	NA	NA	NA	NA	NA	NA	NA	NA	NA	0.848397	3.04561	0	1.8506	0.424199	2.44811	2.52886	0.0658582	0.237846	0	0.144349	0.0329291	0.191098	2.53688
CR44440	FALSE	FALSE	NA	NA	NA	NA	NA	NA	NA	NA	NA	NA	FALSE	FALSE	NA	NA	NA	NA	NA	NA	NA	NA	NA	NA	NA	0.848397	3.04561	0	1.8506	0.424199	2.44811	2.52886	0.0485169	0.175218	0	0.10634	0.0242584	0.140779	2.53688
CR44134	FALSE	FALSE	NA	NA	NA	NA	NA	NA	NA	NA	NA	NA	FALSE	FALSE	NA	NA	NA	NA	NA	NA	NA	NA	NA	NA	NA	0.848397	2.03041	0	2.7759	0.424199	2.40316	2.50212	0.0739205	0.177975	0	0.243031	0.0369603	0.210503	2.5098
CG43174	TRUE	FALSE	NA	NA	NA	NA	NA	NA	NA	NA	NA	NA	TRUE	FALSE	NA	NA	NA	NA	NA	NA	NA	NA	NA	NA	NA	0.848397	2.03041	0	2.7759	0.424199	2.40316	2.50212	0.0561232	0.135125	0	0.184518	0.0280616	0.159822	2.5098
CG14655	TRUE	FALSE	NA	NA	NA	NA	NA	NA	NA	NA	NA	NA	TRUE	FALSE	NA	NA	NA	NA	NA	NA	NA	NA	NA	NA	NA	1.69679	3.04561	0	6.47711	0.848397	4.76136	2.48856	0.0517212	0.0933952	0	0.198386	0.0258606	0.145891	2.49606
CG16965	TRUE	FALSE	NA	NA	NA	NA	NA	NA	NA	NA	NA	NA	TRUE	FALSE	NA	NA	NA	NA	NA	NA	NA	NA	NA	NA	NA	0	2.03041	2.50954	12.0289	1.25477	7.02966	2.48603	0	0.0574329	0.0706028	0.339848	0.0353014	0.19864	2.49236
CR44268	FALSE	FALSE	NA	NA	NA	NA	NA	NA	NA	NA	NA	NA	FALSE	FALSE	NA	NA	NA	NA	NA	NA	NA	NA	NA	NA	NA	0.848397	1.0152	0	3.7012	0.424199	2.3582	2.47488	1.1806	1.42125	0	5.17535	0.590302	3.2983	2.4822
janB	TRUE	FALSE	NA	NA	NA	NA	NA	NA	NA	NA	NA	NA	TRUE	FALSE	NA	NA	NA	NA	NA	NA	NA	NA	NA	NA	NA	0.848397	1.0152	0	3.7012	0.424199	2.3582	2.47488	0.135455	0.163065	0	0.593789	0.0677277	0.378427	2.4822
CheB38c	TRUE	FALSE	NA	NA	NA	NA	NA	NA	NA	NA	NA	NA	TRUE	FALSE	NA	NA	NA	NA	NA	NA	NA	NA	NA	NA	NA	0	5.07602	1.25477	1.8506	0.627385	3.46331	2.46473	0	0.655803	0.161237	0.238805	0.0806185	0.447304	2.47207
SAR_DM|Drosophila_fruit_fly_genus	FALSE	TRUE	NA	NA	NA	NA	NA	NA	NA	NA	NA	NA	FALSE	TRUE	NA	NA	NA	NA	NA	NA	NA	NA	NA	NA	NA	0	5.07602	1.25477	1.8506	0.627385	3.46331	2.46473	0	0.236973	0.0582626	0.0862918	0.0291313	0.161633	2.47207
CG15202	TRUE	FALSE	NA	NA	NA	NA	NA	NA	NA	NA	NA	NA	TRUE	FALSE	NA	NA	NA	NA	NA	NA	NA	NA	NA	NA	NA	3.07432	11.2597	3.03125	22.3533	3.05278	16.8065	2.46082	0.320586	1.18123	0.316286	2.34223	0.318436	1.76173	2.46792
CG9133	TRUE	FALSE	NA	NA	NA	NA	NA	NA	NA	NA	NA	NA	TRUE	FALSE	NA	NA	NA	NA	NA	NA	NA	NA	NA	NA	NA	0.424199	1.19414	0	1.129	0.212099	1.16157	2.45326	0.00883288	0.0250149	0	0.0236221	0.00441644	0.0243185	2.4611
CG8925	TRUE	FALSE	NA	NA	NA	NA	NA	NA	NA	NA	NA	NA	TRUE	FALSE	NA	NA	NA	NA	NA	NA	NA	NA	NA	NA	NA	0.888978	0	0	4.8478	0.444489	2.4239	2.44711	0.0249715	0	0	0.136833	0.0124857	0.0684164	2.45406
roX2	FALSE	FALSE	NA	NA	NA	NA	NA	NA	NA	NA	NA	NA	FALSE	FALSE	NA	NA	NA	NA	NA	NA	NA	NA	NA	NA	NA	1.1242	0	0	6.13051	0.562099	3.06525	2.44711	0.155166	0	0	0.850241	0.077583	0.425121	2.45406
CG16772	TRUE	FALSE	NA	NA	NA	NA	NA	NA	NA	NA	NA	NA	TRUE	FALSE	NA	NA	NA	NA	NA	NA	NA	NA	NA	NA	NA	0	4.21964	1.30384	2.88447	0.651922	3.55205	2.44588	0	0.290414	0.0892522	0.198285	0.0446261	0.244349	2.45299
Gr63a	TRUE	FALSE	NA	NA	NA	NA	NA	NA	NA	NA	NA	NA	TRUE	FALSE	NA	NA	NA	NA	NA	NA	NA	NA	NA	NA	NA	0	4.06082	1.25477	2.7759	0.627385	3.41836	2.44588	0	0.189877	0.0583543	0.129641	0.0291772	0.159759	2.45299
CG43317	TRUE	FALSE	NA	NA	NA	NA	NA	NA	NA	NA	NA	NA	TRUE	FALSE	NA	NA	NA	NA	NA	NA	NA	NA	NA	NA	NA	0	4.06082	1.25477	2.7759	0.627385	3.41836	2.44588	0	0.363456	0.1117	0.248155	0.0558499	0.305805	2.45299
CG30049	TRUE	FALSE	NA	NA	NA	NA	NA	NA	NA	NA	NA	NA	TRUE	FALSE	NA	NA	NA	NA	NA	NA	NA	NA	NA	NA	NA	0.848397	3.04561	1.25477	8.32771	1.05158	5.68666	2.43502	0.0192983	0.0696957	0.0285592	0.190343	0.0239287	0.130019	2.44191
CG30441	TRUE	FALSE	NA	NA	NA	NA	NA	NA	NA	NA	NA	NA	TRUE	FALSE	NA	NA	NA	NA	NA	NA	NA	NA	NA	NA	NA	0	3.04561	1.25477	3.7012	0.627385	3.37341	2.42678	0	0.874403	0.358304	1.06136	0.179152	0.967879	2.43364
CG8945	TRUE	FALSE	NA	NA	NA	NA	NA	NA	NA	NA	NA	NA	TRUE	FALSE	NA	NA	NA	NA	NA	NA	NA	NA	NA	NA	NA	0	3.04561	1.25477	3.7012	0.627385	3.37341	2.42678	0	0.0435409	0.0178417	0.0528502	0.00892087	0.0481955	2.43364
CG18480	TRUE	FALSE	NA	NA	NA	NA	NA	NA	NA	NA	NA	NA	TRUE	FALSE	NA	NA	NA	NA	NA	NA	NA	NA	NA	NA	NA	1.03815	1.24227	1.53541	12.4548	1.28678	6.84853	2.41203	0.0240028	0.0288952	0.0355212	0.289354	0.029762	0.159125	2.41862
CG32371	TRUE	FALSE	NA	NA	NA	NA	NA	NA	NA	NA	NA	NA	TRUE	FALSE	NA	NA	NA	NA	NA	NA	NA	NA	NA	NA	NA	1.69679	7.10643	0	1.8506	0.848397	4.47852	2.40021	0.113261	0.477214	0	0.124124	0.0566305	0.300669	2.40853
net	TRUE	FALSE	NA	NA	NA	NA	NA	NA	NA	NA	NA	NA	TRUE	FALSE	NA	NA	NA	NA	NA	NA	NA	NA	NA	NA	NA	2.02328	7.26326	0	3.31002	1.01164	5.28664	2.38566	0.0685138	0.247437	0	0.112628	0.0342569	0.180032	2.39379
CG8708	TRUE	FALSE	NA	NA	NA	NA	NA	NA	NA	NA	NA	NA	TRUE	FALSE	NA	NA	NA	NA	NA	NA	NA	NA	NA	NA	NA	0	2.09871	1.29698	4.6265	0.648488	3.36261	2.37443	0	0.0845597	0.051975	0.186186	0.0259875	0.135373	2.38105
CG12869	TRUE	FALSE	NA	NA	NA	NA	NA	NA	NA	NA	NA	NA	TRUE	FALSE	NA	NA	NA	NA	NA	NA	NA	NA	NA	NA	NA	2.56741	13.1977	3.79717	19.7514	3.18229	16.4746	2.3721	0.05706	0.295083	0.0844419	0.441091	0.070751	0.368087	2.37923
CG2680	TRUE	FALSE	NA	NA	NA	NA	NA	NA	NA	NA	NA	NA	TRUE	FALSE	NA	NA	NA	NA	NA	NA	NA	NA	NA	NA	NA	1.69679	5.07602	0	3.7012	0.848397	4.38861	2.37095	0.102073	0.307197	0	0.223726	0.0510366	0.265462	2.3789
CG9737	TRUE	FALSE	NA	NA	NA	NA	NA	NA	NA	NA	NA	NA	TRUE	FALSE	NA	NA	NA	NA	NA	NA	NA	NA	NA	NA	NA	1.69679	5.07602	0	3.7012	0.848397	4.38861	2.37095	0.069802	0.210074	0	0.152994	0.034901	0.181534	2.3789
CG44422	TRUE	FALSE	NA	NA	NA	NA	NA	NA	NA	NA	NA	NA	TRUE	FALSE	NA	NA	NA	NA	NA	NA	NA	NA	NA	NA	NA	1.5696	5.57773	0	2.52743	0.784799	4.05258	2.36845	0.0246764	0.0882187	0	0.0399268	0.0123382	0.0640728	2.37658
CG10947	TRUE	FALSE	NA	NA	NA	NA	NA	NA	NA	NA	NA	NA	TRUE	FALSE	NA	NA	NA	NA	NA	NA	NA	NA	NA	NA	NA	1.33589	3.1971	0	3.7012	0.667947	3.44915	2.36844	0.0327996	0.0789703	0	0.0913128	0.0163998	0.0851415	2.37618
Cyt-c-d	TRUE	FALSE	NA	NA	NA	NA	NA	NA	NA	NA	NA	NA	TRUE	FALSE	NA	NA	NA	NA	NA	NA	NA	NA	NA	NA	NA	0	2.15552	1.18593	3.92927	0.592967	3.0424	2.35919	0	0.212443	0.116252	0.386797	0.058126	0.29962	2.36588
CG31693	TRUE	FALSE	NA	NA	NA	NA	NA	NA	NA	NA	NA	NA	TRUE	FALSE	NA	NA	NA	NA	NA	NA	NA	NA	NA	NA	NA	0.863056	6.19647	1.23381	4.54924	1.04844	5.37286	2.35745	0.0266442	0.192451	0.0381132	0.141122	0.0323787	0.166786	2.36488
axo	TRUE	FALSE	NA	NA	NA	NA	NA	NA	NA	NA	NA	NA	TRUE	FALSE	NA	NA	NA	NA	NA	NA	NA	NA	NA	NA	NA	0.883768	4.23012	1.30708	6.74715	1.09543	5.48863	2.32496	0.00751615	0.0361926	0.011123	0.0576592	0.00931957	0.0469259	2.33205
Irk3	TRUE	FALSE	NA	NA	NA	NA	NA	NA	NA	NA	NA	NA	TRUE	FALSE	NA	NA	NA	NA	NA	NA	NA	NA	NA	NA	NA	1.69679	10.152	1.25477	4.6265	1.47578	7.38927	2.32395	0.0622968	0.374974	0.0460958	0.170679	0.0541963	0.272827	2.33172
Syn2	TRUE	FALSE	NA	NA	NA	NA	NA	NA	NA	NA	NA	NA	TRUE	FALSE	NA	NA	NA	NA	NA	NA	NA	NA	NA	NA	NA	1.38199	5.38514	0	1.50726	0.690994	3.4462	2.31826	0.0328857	0.128917	0	0.0360398	0.0164429	0.0824785	2.32656
ssp6	TRUE	FALSE	NA	NA	NA	NA	NA	NA	NA	NA	NA	NA	TRUE	FALSE	NA	NA	NA	NA	NA	NA	NA	NA	NA	NA	NA	3.06984	10.7438	2.9663	18.2273	3.01807	14.4855	2.26292	0.0524272	0.18459	0.0506895	0.312793	0.0515584	0.248691	2.27008
CG5342	TRUE	FALSE	NA	NA	NA	NA	NA	NA	NA	NA	NA	NA	TRUE	FALSE	NA	NA	NA	NA	NA	NA	NA	NA	NA	NA	NA	0.848397	4.06082	0	0	0.424199	2.03041	2.25896	0.020865	0.100472	0	0	0.0104325	0.0502358	2.26763
CR40465	FALSE	FALSE	NA	NA	NA	NA	NA	NA	NA	NA	NA	NA	FALSE	FALSE	NA	NA	NA	NA	NA	NA	NA	NA	NA	NA	NA	0.848397	4.06082	0	0	0.424199	2.03041	2.25896	0.115215	0.554795	0	0	0.0576073	0.277398	2.26763
RSG7	TRUE	FALSE	NA	NA	NA	NA	NA	NA	NA	NA	NA	NA	TRUE	FALSE	NA	NA	NA	NA	NA	NA	NA	NA	NA	NA	NA	0.630652	3.01859	0	0	0.315326	1.50929	2.25896	0.00946152	0.0455602	0	0	0.00473076	0.0227801	2.26763
Tengl1	TRUE	FALSE	NA	NA	NA	NA	NA	NA	NA	NA	NA	NA	TRUE	FALSE	NA	NA	NA	NA	NA	NA	NA	NA	NA	NA	NA	0.848397	4.06082	0	0	0.424199	2.03041	2.25896	0.0551353	0.265494	0	0	0.0275676	0.132747	2.26763
Peritrophin-15a	TRUE	FALSE	NA	NA	NA	NA	NA	NA	NA	NA	NA	NA	TRUE	FALSE	NA	NA	NA	NA	NA	NA	NA	NA	NA	NA	NA	0	0	2.50954	12.0289	1.25477	6.01446	2.26101	0	0	0.915079	4.40475	0.457539	2.20238	2.26709
CG33511	TRUE	FALSE	NA	NA	NA	NA	NA	NA	NA	NA	NA	NA	TRUE	FALSE	NA	NA	NA	NA	NA	NA	NA	NA	NA	NA	NA	0	5.07602	1.25477	0.925301	0.627385	3.00066	2.25786	0	0.310677	0.0763836	0.0565652	0.0381918	0.183621	2.2654
CG9589	TRUE	FALSE	NA	NA	NA	NA	NA	NA	NA	NA	NA	NA	TRUE	FALSE	NA	NA	NA	NA	NA	NA	NA	NA	NA	NA	NA	1.69679	11.1673	1.25477	2.7759	1.47578	6.97158	2.24001	0.129337	0.856347	0.0957014	0.212613	0.112519	0.53448	2.24797
Vha68-3	TRUE	FALSE	NA	NA	NA	NA	NA	NA	NA	NA	NA	NA	TRUE	FALSE	NA	NA	NA	NA	NA	NA	NA	NA	NA	NA	NA	0	4.06082	1.25494	1.8506	0.627469	2.95571	2.23589	0	0.10745	0.0330268	0.0489089	0.0165134	0.0781795	2.24315
CG12200	TRUE	FALSE	NA	NA	NA	NA	NA	NA	NA	NA	NA	NA	TRUE	FALSE	NA	NA	NA	NA	NA	NA	NA	NA	NA	NA	NA	0.848397	7.10643	1.25477	2.7759	1.05158	4.94117	2.23229	0.063121	0.531908	0.0934113	0.207525	0.0782661	0.369716	2.23996
Hsp70Ba	TRUE	FALSE	NA	NA	NA	NA	NA	NA	NA	NA	NA	NA	TRUE	FALSE	NA	NA	NA	NA	NA	NA	NA	NA	NA	NA	NA	3.25844	0	0	15.2954	1.62922	7.64771	2.23084	0.0905825	0	0	0.427255	0.0452912	0.213627	2.23779
CG15172	TRUE	FALSE	NA	NA	NA	NA	NA	NA	NA	NA	NA	NA	TRUE	FALSE	NA	NA	NA	NA	NA	NA	NA	NA	NA	NA	NA	0.959256	3.44358	0	1.04621	0.479628	2.2449	2.22666	0.133649	0.482673	0	0.146468	0.0668247	0.31457	2.23493
CG17104	TRUE	FALSE	NA	NA	NA	NA	NA	NA	NA	NA	NA	NA	TRUE	FALSE	NA	NA	NA	NA	NA	NA	NA	NA	NA	NA	NA	0.951861	3.41703	0	1.03814	0.47593	2.22759	2.22666	0.0359526	0.129842	0	0.0394008	0.0179763	0.0846215	2.23493
Scgbeta	TRUE	FALSE	NA	NA	NA	NA	NA	NA	NA	NA	NA	NA	TRUE	FALSE	NA	NA	NA	NA	NA	NA	NA	NA	NA	NA	NA	1.69679	6.09123	0	1.8506	0.848397	3.97092	2.22666	0.10074	0.36382	0	0.110402	0.0503698	0.237111	2.23493
amon	TRUE	FALSE	NA	NA	NA	NA	NA	NA	NA	NA	NA	NA	TRUE	FALSE	NA	NA	NA	NA	NA	NA	NA	NA	NA	NA	NA	0	3.04561	1.25477	2.7759	0.627385	2.91076	2.21397	0	0.0477319	0.0195591	0.043453	0.00977955	0.0455925	2.22096
CG3253	TRUE	FALSE	NA	NA	NA	NA	NA	NA	NA	NA	NA	NA	TRUE	FALSE	NA	NA	NA	NA	NA	NA	NA	NA	NA	NA	NA	0	3.33671	1.3747	3.04122	0.687349	3.18896	2.21397	0	0.135682	0.0555984	0.123519	0.0277992	0.129601	2.22096
CG12920	TRUE	FALSE	NA	NA	NA	NA	NA	NA	NA	NA	NA	NA	TRUE	FALSE	NA	NA	NA	NA	NA	NA	NA	NA	NA	NA	NA	0.848397	2.03041	0	1.8506	0.424199	1.94051	2.19362	0.0452328	0.108905	0	0.0991422	0.0226164	0.104024	2.20147
Ir51b	TRUE	FALSE	NA	NA	NA	NA	NA	NA	NA	NA	NA	NA	TRUE	FALSE	NA	NA	NA	NA	NA	NA	NA	NA	NA	NA	NA	1.69679	4.06082	0	3.7012	0.848397	3.88101	2.19362	0.0628437	0.151306	0	0.137742	0.0314218	0.144524	2.20147
CR45583	FALSE	FALSE	NA	NA	NA	NA	NA	NA	NA	NA	NA	NA	FALSE	FALSE	NA	NA	NA	NA	NA	NA	NA	NA	NA	NA	NA	0.848397	2.03041	0	1.8506	0.424199	1.94051	2.19362	0.0710895	0.171159	0	0.155816	0.0355447	0.163487	2.20147
spz6	TRUE	FALSE	NA	NA	NA	NA	NA	NA	NA	NA	NA	NA	TRUE	FALSE	NA	NA	NA	NA	NA	NA	NA	NA	NA	NA	NA	0.848397	2.03041	0	1.8506	0.424199	1.94051	2.19362	0.0346118	0.0833333	0	0.0758629	0.0173059	0.0795981	2.20147
CG13091	TRUE	FALSE	NA	NA	NA	NA	NA	NA	NA	NA	NA	NA	TRUE	FALSE	NA	NA	NA	NA	NA	NA	NA	NA	NA	NA	NA	0.87018	4.16508	1.28699	5.69435	1.07858	4.92971	2.19237	0.032994	0.158876	0.048827	0.216951	0.0409105	0.187914	2.19953
CG33468	TRUE	FALSE	NA	NA	NA	NA	NA	NA	NA	NA	NA	NA	TRUE	FALSE	NA	NA	NA	NA	NA	NA	NA	NA	NA	NA	NA	0	2.03041	1.25477	3.7012	0.627385	2.86581	2.19152	0	0.295755	0.181787	0.538484	0.0908936	0.417119	2.19821
iav	TRUE	FALSE	NA	NA	NA	NA	NA	NA	NA	NA	NA	NA	TRUE	FALSE	NA	NA	NA	NA	NA	NA	NA	NA	NA	NA	NA	1.69679	3.04561	0	4.6265	0.848397	3.83606	2.17681	0.0302552	0.0546331	0	0.0828925	0.0151276	0.0687628	2.18445
CR44228	FALSE	FALSE	NA	NA	NA	NA	NA	NA	NA	NA	NA	NA	FALSE	FALSE	NA	NA	NA	NA	NA	NA	NA	NA	NA	NA	NA	1.69679	3.04561	0	4.6265	0.848397	3.83606	2.17681	0.060602	0.109432	0	0.166036	0.030301	0.137734	2.18445
CG30090	TRUE	FALSE	NA	NA	NA	NA	NA	NA	NA	NA	NA	NA	TRUE	FALSE	NA	NA	NA	NA	NA	NA	NA	NA	NA	NA	NA	1.69679	4.06082	1.25477	9.25301	1.47578	6.65691	2.17337	0.125295	0.301668	0.0927107	0.686562	0.109003	0.494115	2.18048
CG18788	TRUE	FALSE	NA	NA	NA	NA	NA	NA	NA	NA	NA	NA	TRUE	FALSE	NA	NA	NA	NA	NA	NA	NA	NA	NA	NA	NA	0	1.0152	1.25477	4.6265	0.627385	2.82085	2.16871	0	0.0375908	0.0462108	0.171105	0.0231054	0.104348	2.1751
vanin-like	TRUE	FALSE	NA	NA	NA	NA	NA	NA	NA	NA	NA	NA	TRUE	FALSE	NA	NA	NA	NA	NA	NA	NA	NA	NA	NA	NA	0	1.0152	1.25477	4.6265	0.627385	2.82085	2.16871	0	0.0362362	0.0445455	0.164939	0.0222727	0.100588	2.1751
CG14346	TRUE	FALSE	NA	NA	NA	NA	NA	NA	NA	NA	NA	NA	TRUE	FALSE	NA	NA	NA	NA	NA	NA	NA	NA	NA	NA	NA	2.01724	2.41385	0	6.60027	1.00862	4.50706	2.15981	0.180281	0.217028	0	0.592717	0.0901407	0.404873	2.16722
CG1428	TRUE	FALSE	NA	NA	NA	NA	NA	NA	NA	NA	NA	NA	TRUE	FALSE	NA	NA	NA	NA	NA	NA	NA	NA	NA	NA	NA	0.848397	1.0152	0	2.7759	0.424199	1.89555	2.15981	0.0273569	0.032933	0	0.0899422	0.0136784	0.0614376	2.16722
CG32755	TRUE	FALSE	NA	NA	NA	NA	NA	NA	NA	NA	NA	NA	TRUE	FALSE	NA	NA	NA	NA	NA	NA	NA	NA	NA	NA	NA	0.848397	1.0152	0	2.7759	0.424199	1.89555	2.15981	0.0436567	0.0525552	0	0.143532	0.0218284	0.0980435	2.16722
CG43189	TRUE	FALSE	NA	NA	NA	NA	NA	NA	NA	NA	NA	NA	TRUE	FALSE	NA	NA	NA	NA	NA	NA	NA	NA	NA	NA	NA	0.848397	1.0152	0	2.7759	0.424199	1.89555	2.15981	0.124673	0.150085	0	0.409891	0.0623364	0.279988	2.16722
Uch-L5R	TRUE	FALSE	NA	NA	NA	NA	NA	NA	NA	NA	NA	NA	TRUE	FALSE	NA	NA	NA	NA	NA	NA	NA	NA	NA	NA	NA	0.848397	1.0152	0	2.7759	0.424199	1.89555	2.15981	0.0456032	0.0548985	0	0.149931	0.0228016	0.102415	2.16722
CCHa1-R	TRUE	FALSE	NA	NA	NA	NA	NA	NA	NA	NA	NA	NA	TRUE	FALSE	NA	NA	NA	NA	NA	NA	NA	NA	NA	NA	NA	0.848397	1.0152	0	2.7759	0.424199	1.89555	2.15981	0.0205148	0.0246964	0	0.0674474	0.0102574	0.0460719	2.16722
CG10834	TRUE	FALSE	NA	NA	NA	NA	NA	NA	NA	NA	NA	NA	TRUE	FALSE	NA	NA	NA	NA	NA	NA	NA	NA	NA	NA	NA	0.848397	1.0152	0	2.7759	0.424199	1.89555	2.15981	0.205405	0.247273	0	0.675318	0.102703	0.461296	2.16722
CG17664	TRUE	FALSE	NA	NA	NA	NA	NA	NA	NA	NA	NA	NA	TRUE	FALSE	NA	NA	NA	NA	NA	NA	NA	NA	NA	NA	NA	0.924604	1.1064	0	3.02525	0.462302	2.06582	2.15981	0.0629624	0.0757959	0	0.207003	0.0314812	0.1414	2.16722
CG30289	TRUE	FALSE	NA	NA	NA	NA	NA	NA	NA	NA	NA	NA	TRUE	FALSE	NA	NA	NA	NA	NA	NA	NA	NA	NA	NA	NA	0.848397	1.0152	0	2.7759	0.424199	1.89555	2.15981	0.0519357	0.0625217	0	0.170751	0.0259679	0.116636	2.16722
CG42370	TRUE	FALSE	NA	NA	NA	NA	NA	NA	NA	NA	NA	NA	TRUE	FALSE	NA	NA	NA	NA	NA	NA	NA	NA	NA	NA	NA	0.848397	1.0152	0	2.7759	0.424199	1.89555	2.15981	0.0266726	0.0321092	0	0.0876924	0.0133363	0.0599008	2.16722
CG10761	TRUE	FALSE	NA	NA	NA	NA	NA	NA	NA	NA	NA	NA	TRUE	FALSE	NA	NA	NA	NA	NA	NA	NA	NA	NA	NA	NA	0.848397	1.0152	0	2.7759	0.424199	1.89555	2.15981	0.0475502	0.0572423	0	0.156333	0.0237751	0.106787	2.16722
CG42246	TRUE	FALSE	NA	NA	NA	NA	NA	NA	NA	NA	NA	NA	TRUE	FALSE	NA	NA	NA	NA	NA	NA	NA	NA	NA	NA	NA	1.2793	1.53083	0	4.18579	0.63965	2.85831	2.15981	0.266567	0.320902	0	0.876402	0.133284	0.598652	2.16722
CG3734	TRUE	FALSE	NA	NA	NA	NA	NA	NA	NA	NA	NA	NA	TRUE	FALSE	NA	NA	NA	NA	NA	NA	NA	NA	NA	NA	NA	0	0	2.58744	11.4483	1.29372	5.72413	2.14553	0	0	0.110947	0.492967	0.0554737	0.246484	2.15162
ms(3)72Dt	TRUE	FALSE	NA	NA	NA	NA	NA	NA	NA	NA	NA	NA	TRUE	FALSE	NA	NA	NA	NA	NA	NA	NA	NA	NA	NA	NA	0	0	1.25477	5.55181	0.627385	2.7759	2.14553	0	0	0.0403746	0.179395	0.0201873	0.0896973	2.15162
CG14989	TRUE	FALSE	NA	NA	NA	NA	NA	NA	NA	NA	NA	NA	TRUE	FALSE	NA	NA	NA	NA	NA	NA	NA	NA	NA	NA	NA	0	0	0.537361	2.36196	0.268681	1.18098	2.13602	0	0	0.0272878	0.120449	0.0136439	0.0602246	2.1421
CR44997	FALSE	FALSE	NA	NA	NA	NA	NA	NA	NA	NA	NA	NA	FALSE	FALSE	NA	NA	NA	NA	NA	NA	NA	NA	NA	NA	NA	0.848397	0	0	3.7012	0.424199	1.8506	2.12518	0.0738116	0	0	0.323564	0.0369058	0.161782	2.13213
CR45272	FALSE	FALSE	NA	NA	NA	NA	NA	NA	NA	NA	NA	NA	FALSE	FALSE	NA	NA	NA	NA	NA	NA	NA	NA	NA	NA	NA	0.848397	0	0	3.7012	0.424199	1.8506	2.12518	0.0149918	0	0	0.0657189	0.00749592	0.0328595	2.13213
CR45484	FALSE	FALSE	NA	NA	NA	NA	NA	NA	NA	NA	NA	NA	FALSE	FALSE	NA	NA	NA	NA	NA	NA	NA	NA	NA	NA	NA	0.848397	0	0	3.7012	0.424199	1.8506	2.12518	0.463259	0	0	2.03076	0.231629	1.01538	2.13213
CG42335	TRUE	FALSE	NA	NA	NA	NA	NA	NA	NA	NA	NA	NA	TRUE	FALSE	NA	NA	NA	NA	NA	NA	NA	NA	NA	NA	NA	0.848397	0	0	3.7012	0.424199	1.8506	2.12518	0.0193729	0	0	0.084924	0.00968646	0.042462	2.13213
en	TRUE	FALSE	NA	NA	NA	NA	NA	NA	NA	NA	NA	NA	TRUE	FALSE	NA	NA	NA	NA	NA	NA	NA	NA	NA	NA	NA	0.909612	1.90238	0	1.98413	0.454806	1.94326	2.09515	0.0221173	0.0465355	0	0.0484772	0.0110586	0.0475063	2.10294
CG34277	TRUE	FALSE	NA	NA	NA	NA	NA	NA	NA	NA	NA	NA	TRUE	FALSE	NA	NA	NA	NA	NA	NA	NA	NA	NA	NA	NA	3.54317	9.8929	0	5.15246	1.77159	7.52268	2.08621	0.167246	0.469783	0	0.244382	0.0836229	0.357082	2.09429
CG18545	TRUE	FALSE	NA	NA	NA	NA	NA	NA	NA	NA	NA	NA	TRUE	FALSE	NA	NA	NA	NA	NA	NA	NA	NA	NA	NA	NA	0.848397	4.2548	1.25477	4.6697	1.05158	4.46225	2.08521	0.108717	0.548511	0.160887	0.60128	0.134802	0.574896	2.09246
CG9130	TRUE	FALSE	NA	NA	NA	NA	NA	NA	NA	NA	NA	NA	TRUE	FALSE	NA	NA	NA	NA	NA	NA	NA	NA	NA	NA	NA	0.429656	0.972395	0	0.845151	0.214828	0.908773	2.08074	0.00883288	0.020111	0	0.0174585	0.00441644	0.0187848	2.08861
CG16736	TRUE	FALSE	NA	NA	NA	NA	NA	NA	NA	NA	NA	NA	TRUE	FALSE	NA	NA	NA	NA	NA	NA	NA	NA	NA	NA	NA	0.848397	6.09123	1.25477	2.7759	1.05158	4.43357	2.0759	0.0706884	0.510581	0.10461	0.232405	0.0876493	0.371493	2.08352
CR44386	FALSE	FALSE	NA	NA	NA	NA	NA	NA	NA	NA	NA	NA	FALSE	FALSE	NA	NA	NA	NA	NA	NA	NA	NA	NA	NA	NA	0.848397	6.09123	1.25477	2.7759	1.05158	4.43357	2.0759	0.139218	1.00557	0.206026	0.457712	0.172622	0.731641	2.08352
verm	TRUE	FALSE	NA	NA	NA	NA	NA	NA	NA	NA	NA	NA	TRUE	FALSE	NA	NA	NA	NA	NA	NA	NA	NA	NA	NA	NA	1.71233	7.1715	0	0	0.856165	3.58575	2.06631	0.0509845	0.214818	0	0	0.0254923	0.107409	2.07499
CG4269	TRUE	FALSE	NA	NA	NA	NA	NA	NA	NA	NA	NA	NA	TRUE	FALSE	NA	NA	NA	NA	NA	NA	NA	NA	NA	NA	NA	5.23267	10.4358	0	11.414	2.61633	10.9249	2.062	0.442223	0.887268	0	0.969274	0.221111	0.928271	2.06977
CG14829	TRUE	FALSE	NA	NA	NA	NA	NA	NA	NA	NA	NA	NA	TRUE	FALSE	NA	NA	NA	NA	NA	NA	NA	NA	NA	NA	NA	0.848397	5.07602	1.25477	3.7012	1.05158	4.38861	2.0612	0.0473705	0.28513	0.0701025	0.207655	0.0587365	0.246392	2.06863
DM297_LTR|Drosophila_fruit_fly_genus	FALSE	TRUE	NA	NA	NA	NA	NA	NA	NA	NA	NA	NA	FALSE	TRUE	NA	NA	NA	NA	NA	NA	NA	NA	NA	NA	NA	1.01513	2.46011	1.31917	7.2738	1.16715	4.86696	2.06003	0.278923	0.680028	0.362679	2.00824	0.320801	1.34413	2.06693
CG31087	TRUE	FALSE	NA	NA	NA	NA	NA	NA	NA	NA	NA	NA	TRUE	FALSE	NA	NA	NA	NA	NA	NA	NA	NA	NA	NA	NA	0.852823	0	2.52263	13.9519	1.68773	6.97596	2.04731	0.040223	0	0.11905	0.661213	0.0796367	0.330607	2.05361
CG12446	TRUE	FALSE	NA	NA	NA	NA	NA	NA	NA	NA	NA	NA	TRUE	FALSE	NA	NA	NA	NA	NA	NA	NA	NA	NA	NA	NA	0.848397	3.04561	1.25477	5.55181	1.05158	4.29871	2.03134	0.0204981	0.0740285	0.0303346	0.134784	0.0254163	0.104406	2.03838
Toll-9	TRUE	FALSE	NA	NA	NA	NA	NA	NA	NA	NA	NA	NA	TRUE	FALSE	NA	NA	NA	NA	NA	NA	NA	NA	NA	NA	NA	0	4.06082	1.36691	1.52164	0.683456	2.79123	2.02998	0	0.0891843	0.0298584	0.0333787	0.0149292	0.0612815	2.03732
dve	TRUE	FALSE	NA	NA	NA	NA	NA	NA	NA	NA	NA	NA	TRUE	FALSE	NA	NA	NA	NA	NA	NA	NA	NA	NA	NA	NA	1.03442	23.5183	6.1196	5.64094	3.57701	14.5796	2.02713	0.0153265	0.35056	0.0907255	0.0839826	0.053026	0.217271	2.03472
Cyp6a18	TRUE	FALSE	NA	NA	NA	NA	NA	NA	NA	NA	NA	NA	TRUE	FALSE	NA	NA	NA	NA	NA	NA	NA	NA	NA	NA	NA	3.04947	9.1226	4.51013	21.6183	3.7798	15.3704	2.02378	0.0654707	0.197039	0.0968887	0.466376	0.0811797	0.331707	2.03072
Or85f	TRUE	FALSE	NA	NA	NA	NA	NA	NA	NA	NA	NA	NA	TRUE	FALSE	NA	NA	NA	NA	NA	NA	NA	NA	NA	NA	NA	0	5.07602	1.25477	0	0.627385	2.53801	2.01628	0	0.307824	0.0756821	0	0.037841	0.153912	2.02408
CG2217	TRUE	FALSE	NA	NA	NA	NA	NA	NA	NA	NA	NA	NA	TRUE	FALSE	NA	NA	NA	NA	NA	NA	NA	NA	NA	NA	NA	1.5846	9.32039	5.42346	19.0341	3.50403	14.1773	2.01649	0.0319425	0.189014	0.109393	0.385545	0.0706676	0.28728	2.02334
CG11340	TRUE	FALSE	NA	NA	NA	NA	NA	NA	NA	NA	NA	NA	TRUE	FALSE	NA	NA	NA	NA	NA	NA	NA	NA	NA	NA	NA	0.848397	2.03041	1.25477	6.47711	1.05158	4.25376	2.01617	0.0245075	0.0590056	0.0362681	0.188006	0.0303878	0.123506	2.02302
CG43980	TRUE	FALSE	NA	NA	NA	NA	NA	NA	NA	NA	NA	NA	TRUE	FALSE	NA	NA	NA	NA	NA	NA	NA	NA	NA	NA	NA	1.71505	4.10451	0	2.80577	0.857524	3.45514	2.01049	0.0209391	0.0504142	0	0.0344211	0.0104695	0.0424176	2.01847
CG34007	TRUE	FALSE	NA	NA	NA	NA	NA	NA	NA	NA	NA	NA	TRUE	FALSE	NA	NA	NA	NA	NA	NA	NA	NA	NA	NA	NA	0.666852	1.39498	0	1.27144	0.333426	1.33321	1.99946	0.106183	0.223461	0	0.203429	0.0530914	0.213445	2.00731
TyrRII	TRUE	FALSE	NA	NA	NA	NA	NA	NA	NA	NA	NA	NA	TRUE	FALSE	NA	NA	NA	NA	NA	NA	NA	NA	NA	NA	NA	1.97772	6.70121	0	1.17221	0.988861	3.93671	1.99315	0.0474151	0.161627	0	0.0282389	0.0237076	0.0949331	2.00156
CG43120	TRUE	FALSE	NA	NA	NA	NA	NA	NA	NA	NA	NA	NA	TRUE	FALSE	NA	NA	NA	NA	NA	NA	NA	NA	NA	NA	NA	0	4.06082	1.25477	0.925301	0.627385	2.49306	1.99049	0	0.225335	0.0692516	0.0512837	0.0346258	0.138309	1.99798
AstA-R1	TRUE	FALSE	NA	NA	NA	NA	NA	NA	NA	NA	NA	NA	TRUE	FALSE	NA	NA	NA	NA	NA	NA	NA	NA	NA	NA	NA	0	4.08961	1.26367	0.93186	0.631833	2.51073	1.99049	0	0.0698301	0.0214607	0.0158925	0.0107303	0.0428613	1.99798
CG8664	TRUE	FALSE	NA	NA	NA	NA	NA	NA	NA	NA	NA	NA	TRUE	FALSE	NA	NA	NA	NA	NA	NA	NA	NA	NA	NA	NA	0	0	0.861967	3.4	0.430983	1.7	1.97983	0	0	0.0540585	0.214133	0.0270293	0.107067	1.98591
Cyp4d14	TRUE	FALSE	NA	NA	NA	NA	NA	NA	NA	NA	NA	NA	TRUE	FALSE	NA	NA	NA	NA	NA	NA	NA	NA	NA	NA	NA	3.40385	4.0731	0	9.28099	1.70192	6.67705	1.97204	0.134906	0.162404	0	0.369613	0.067453	0.266009	1.97952
CR44444	FALSE	FALSE	NA	NA	NA	NA	NA	NA	NA	NA	NA	NA	FALSE	FALSE	NA	NA	NA	NA	NA	NA	NA	NA	NA	NA	NA	0	3.04561	1.25477	1.8506	0.627385	2.44811	1.96424	0	0.296723	0.121588	0.180082	0.0607941	0.238403	1.9714
CG9150	TRUE	FALSE	NA	NA	NA	NA	NA	NA	NA	NA	NA	NA	TRUE	FALSE	NA	NA	NA	NA	NA	NA	NA	NA	NA	NA	NA	0	3.04561	1.25477	1.8506	0.627385	2.44811	1.96424	0	0.269748	0.110535	0.163711	0.0552673	0.216729	1.9714
Gr85a	TRUE	FALSE	NA	NA	NA	NA	NA	NA	NA	NA	NA	NA	TRUE	FALSE	NA	NA	NA	NA	NA	NA	NA	NA	NA	NA	NA	0	3.04561	1.25477	1.8506	0.627385	2.44811	1.96424	0	0.18191	0.0745412	0.110402	0.0372706	0.146156	1.9714
S-Lap2	TRUE	FALSE	NA	NA	NA	NA	NA	NA	NA	NA	NA	NA	TRUE	FALSE	NA	NA	NA	NA	NA	NA	NA	NA	NA	NA	NA	0	3.04561	1.25477	1.8506	0.627385	2.44811	1.96424	0	0.0955648	0.0391596	0.0579986	0.0195798	0.0767817	1.9714
CG31221	TRUE	FALSE	NA	NA	NA	NA	NA	NA	NA	NA	NA	NA	TRUE	FALSE	NA	NA	NA	NA	NA	NA	NA	NA	NA	NA	NA	2.45705	5.88028	0	3.7012	1.22852	4.79074	1.96332	0.0349497	0.0841469	0	0.0529011	0.0174748	0.068524	1.97133
CG31626	TRUE	FALSE	NA	NA	NA	NA	NA	NA	NA	NA	NA	NA	TRUE	FALSE	NA	NA	NA	NA	NA	NA	NA	NA	NA	NA	NA	0	3.49669	1.1114	0.819574	0.555699	2.15813	1.95741	0	0.20156	0.0637185	0.0471862	0.0318593	0.124373	1.96489
CG3526	TRUE	FALSE	NA	NA	NA	NA	NA	NA	NA	NA	NA	NA	TRUE	FALSE	NA	NA	NA	NA	NA	NA	NA	NA	NA	NA	NA	0.741029	1.77345	0	1.08209	0.370514	1.42777	1.94616	0.0566305	0.136347	0	0.0830938	0.0283153	0.10972	1.95418
5-HT7	TRUE	FALSE	NA	NA	NA	NA	NA	NA	NA	NA	NA	NA	TRUE	FALSE	NA	NA	NA	NA	NA	NA	NA	NA	NA	NA	NA	3.0057	5.82814	0	5.73678	1.50285	5.78246	1.94398	0.0467625	0.0912204	0	0.0896832	0.0233812	0.0904518	1.9518
CG45067	TRUE	FALSE	NA	NA	NA	NA	NA	NA	NA	NA	NA	NA	TRUE	FALSE	NA	NA	NA	NA	NA	NA	NA	NA	NA	NA	NA	0	2.03041	1.25477	2.7759	0.627385	2.40316	1.93751	0	0.055658	0.0342104	0.0760027	0.0171052	0.0658304	1.94432
sut3	TRUE	FALSE	NA	NA	NA	NA	NA	NA	NA	NA	NA	NA	TRUE	FALSE	NA	NA	NA	NA	NA	NA	NA	NA	NA	NA	NA	0	2.03626	1.25839	2.7839	0.629195	2.41008	1.93751	0	0.0871236	0.0535509	0.11897	0.0267755	0.103047	1.94432
sns	TRUE	FALSE	NA	NA	NA	NA	NA	NA	NA	NA	NA	NA	TRUE	FALSE	NA	NA	NA	NA	NA	NA	NA	NA	NA	NA	NA	0	2.03991	1.26076	2.78889	0.630382	2.4144	1.93737	0	0.0145274	0.00893017	0.0198376	0.00446509	0.0171825	1.94418
CG32812	TRUE	FALSE	NA	NA	NA	NA	NA	NA	NA	NA	NA	NA	TRUE	FALSE	NA	NA	NA	NA	NA	NA	NA	NA	NA	NA	NA	0.66084	7.11712	1.95475	2.88297	1.30779	5.00004	1.9348	0.0357985	0.387867	0.105955	0.156928	0.0708766	0.272397	1.94233
CG17930	TRUE	FALSE	NA	NA	NA	NA	NA	NA	NA	NA	NA	NA	TRUE	FALSE	NA	NA	NA	NA	NA	NA	NA	NA	NA	NA	NA	1.69679	0	0	6.47711	0.848397	3.23855	1.93254	0.0689379	0	0	0.264424	0.034469	0.132212	1.93949
CG16743	TRUE	FALSE	NA	NA	NA	NA	NA	NA	NA	NA	NA	NA	TRUE	FALSE	NA	NA	NA	NA	NA	NA	NA	NA	NA	NA	NA	1.06011	4.23105	1.56789	5.78101	1.314	5.00603	1.9297	0.0922988	0.370599	0.136591	0.505756	0.114445	0.438178	1.93686
Idgf5	TRUE	FALSE	NA	NA	NA	NA	NA	NA	NA	NA	NA	NA	TRUE	FALSE	NA	NA	NA	NA	NA	NA	NA	NA	NA	NA	NA	0	3.04561	2.50954	6.47711	1.25477	4.76136	1.92395	0	0.139661	0.114457	0.296661	0.0572287	0.218161	1.93058
CG13928	TRUE	FALSE	NA	NA	NA	NA	NA	NA	NA	NA	NA	NA	TRUE	FALSE	NA	NA	NA	NA	NA	NA	NA	NA	NA	NA	NA	2.54519	4.06082	0	5.55181	1.2726	4.80631	1.91716	0.062962	0.101061	0	0.138002	0.031481	0.119531	1.92483
Cyp12c1	TRUE	FALSE	NA	NA	NA	NA	NA	NA	NA	NA	NA	NA	TRUE	FALSE	NA	NA	NA	NA	NA	NA	NA	NA	NA	NA	NA	0.780424	5.56031	1.37448	2.5535	1.07745	4.05691	1.91275	0.0297435	0.213192	0.0524158	0.0977888	0.0410796	0.15549	1.92033
CR43425	FALSE	FALSE	NA	NA	NA	NA	NA	NA	NA	NA	NA	NA	FALSE	FALSE	NA	NA	NA	NA	NA	NA	NA	NA	NA	NA	NA	0	2.03115	1.27857	2.7759	0.639287	2.40353	1.91062	0	0.0362603	0.0227021	0.0494965	0.011351	0.0428784	1.91743
Cyp4ac1	TRUE	FALSE	NA	NA	NA	NA	NA	NA	NA	NA	NA	NA	TRUE	FALSE	NA	NA	NA	NA	NA	NA	NA	NA	NA	NA	NA	0	1.0152	1.25477	3.7012	0.627385	2.3582	1.91027	0	0.041127	0.0505578	0.149761	0.0252789	0.0954438	1.91672
CG17195	TRUE	FALSE	NA	NA	NA	NA	NA	NA	NA	NA	NA	NA	TRUE	FALSE	NA	NA	NA	NA	NA	NA	NA	NA	NA	NA	NA	0	1.0152	1.25477	3.7012	0.627385	2.3582	1.91027	0	0.0833337	0.102443	0.303453	0.0512214	0.193393	1.91672
Obp56d	TRUE	FALSE	NA	NA	NA	NA	NA	NA	NA	NA	NA	NA	TRUE	FALSE	NA	NA	NA	NA	NA	NA	NA	NA	NA	NA	NA	4.82636	30.3203	5.3536	7.89578	5.08998	19.1081	1.90845	0.511413	3.23218	0.567621	0.840695	0.539517	2.03644	1.91631
CG14644	TRUE	FALSE	NA	NA	NA	NA	NA	NA	NA	NA	NA	NA	TRUE	FALSE	NA	NA	NA	NA	NA	NA	NA	NA	NA	NA	NA	0	4.95748	3.85653	9.47969	1.92826	7.21858	1.90441	0	0.361279	0.27953	0.690012	0.139765	0.525645	1.91109
Kua	TRUE	FALSE	NA	NA	NA	NA	NA	NA	NA	NA	NA	NA	TRUE	FALSE	NA	NA	NA	NA	NA	NA	NA	NA	NA	NA	NA	1.68719	11.1041	4.33714	11.3089	3.01217	11.2065	1.89546	0.0596996	0.395275	0.153558	0.402086	0.106629	0.39868	1.90264
DMTOM1_LTR|Drosophila_fruit_fly_genus	FALSE	TRUE	NA	NA	NA	NA	NA	NA	NA	NA	NA	NA	FALSE	TRUE	NA	NA	NA	NA	NA	NA	NA	NA	NA	NA	NA	0.848397	5.07602	1.26917	2.7759	1.05879	3.92596	1.89064	0.237528	1.42972	0.355548	0.78093	0.296538	1.10532	1.89818
CR43464	FALSE	FALSE	NA	NA	NA	NA	NA	NA	NA	NA	NA	NA	FALSE	FALSE	NA	NA	NA	NA	NA	NA	NA	NA	NA	NA	NA	1.69679	8.12164	1.25477	2.7759	1.47578	5.44877	1.88445	0.0445888	0.214709	0.032993	0.073298	0.0387909	0.144004	1.89232
CG4836	TRUE	FALSE	NA	NA	NA	NA	NA	NA	NA	NA	NA	NA	TRUE	FALSE	NA	NA	NA	NA	NA	NA	NA	NA	NA	NA	NA	0.850157	4.06938	1.25743	3.70895	1.0538	3.88917	1.88387	0.0134715	0.0648717	0.0199371	0.0590554	0.0167043	0.0619635	1.8912
CG14961	TRUE	FALSE	NA	NA	NA	NA	NA	NA	NA	NA	NA	NA	TRUE	FALSE	NA	NA	NA	NA	NA	NA	NA	NA	NA	NA	NA	0.848397	4.06082	2.50954	8.32771	1.67897	6.19426	1.88336	0.0174992	0.0842642	0.0517934	0.172598	0.0346463	0.128431	1.89022
Kah	TRUE	FALSE	NA	NA	NA	NA	NA	NA	NA	NA	NA	NA	TRUE	FALSE	NA	NA	NA	NA	NA	NA	NA	NA	NA	NA	NA	0	0	1.25477	4.6265	0.627385	2.31325	1.8825	0	0	0.0282438	0.104578	0.0141219	0.0522892	1.88858
Pal2	TRUE	FALSE	NA	NA	NA	NA	NA	NA	NA	NA	NA	NA	TRUE	FALSE	NA	NA	NA	NA	NA	NA	NA	NA	NA	NA	NA	0	0	1.4966	5.51817	0.748301	2.75909	1.8825	0	0	0.0508699	0.188356	0.0254349	0.0941782	1.88858
CG15553	TRUE	FALSE	NA	NA	NA	NA	NA	NA	NA	NA	NA	NA	TRUE	FALSE	NA	NA	NA	NA	NA	NA	NA	NA	NA	NA	NA	0	0	1.25477	4.6265	0.627385	2.31325	1.8825	0	0	0.0467939	0.173264	0.0233969	0.086632	1.88858
Cyp28d1	TRUE	FALSE	NA	NA	NA	NA	NA	NA	NA	NA	NA	NA	TRUE	FALSE	NA	NA	NA	NA	NA	NA	NA	NA	NA	NA	NA	0	0	1.25477	4.6265	0.627385	2.31325	1.8825	0	0	0.0523049	0.19367	0.0261524	0.0968349	1.88858
GABA-B-R3	TRUE	FALSE	NA	NA	NA	NA	NA	NA	NA	NA	NA	NA	TRUE	FALSE	NA	NA	NA	NA	NA	NA	NA	NA	NA	NA	NA	6.70235	18.4261	1.25477	10.6885	3.97856	14.5573	1.87142	0.0715839	0.197985	0.0134095	0.114709	0.0424967	0.156347	1.87932
CG11889	TRUE	FALSE	NA	NA	NA	NA	NA	NA	NA	NA	NA	NA	TRUE	FALSE	NA	NA	NA	NA	NA	NA	NA	NA	NA	NA	NA	1.46573	10.5235	2.16779	2.56765	1.81676	6.54556	1.84915	0.0448282	0.323793	0.0663402	0.0789087	0.0555842	0.201351	1.85696
CG3344	TRUE	FALSE	NA	NA	NA	NA	NA	NA	NA	NA	NA	NA	TRUE	FALSE	NA	NA	NA	NA	NA	NA	NA	NA	NA	NA	NA	0.848397	2.03041	1.25477	5.55181	1.05158	3.79111	1.85006	0.039124	0.0941973	0.0578988	0.257259	0.0485114	0.175728	1.85695
ss	TRUE	FALSE	NA	NA	NA	NA	NA	NA	NA	NA	NA	NA	TRUE	FALSE	NA	NA	NA	NA	NA	NA	NA	NA	NA	NA	NA	0	2.04216	0.961529	1.41811	0.480764	1.73014	1.84749	0	0.0317709	0.0148782	0.0220359	0.00743912	0.0269034	1.85458
CG15201	TRUE	FALSE	NA	NA	NA	NA	NA	NA	NA	NA	NA	NA	TRUE	FALSE	NA	NA	NA	NA	NA	NA	NA	NA	NA	NA	NA	0.848397	3.04561	0	0	0.424199	1.52281	1.84392	0.172823	0.624149	0	0	0.0864116	0.312075	1.85259
CG12766	TRUE	FALSE	NA	NA	NA	NA	NA	NA	NA	NA	NA	NA	TRUE	FALSE	NA	NA	NA	NA	NA	NA	NA	NA	NA	NA	NA	0.848397	1.0152	1.25477	6.47711	1.05158	3.74616	1.83285	0.0572123	0.0688739	0.0846673	0.438897	0.0709398	0.253886	1.83951
CG2861	TRUE	FALSE	NA	NA	NA	NA	NA	NA	NA	NA	NA	NA	TRUE	FALSE	NA	NA	NA	NA	NA	NA	NA	NA	NA	NA	NA	1.82314	7.12813	1.25094	3.71249	1.53704	5.42031	1.81822	0.0187286	0.0736668	0.0128583	0.0383215	0.0157935	0.0559942	1.82595
hh	TRUE	FALSE	NA	NA	NA	NA	NA	NA	NA	NA	NA	NA	TRUE	FALSE	NA	NA	NA	NA	NA	NA	NA	NA	NA	NA	NA	0.848397	8.12164	2.50954	3.7012	1.67897	5.91142	1.81593	0.0230851	0.222324	0.0683263	0.101197	0.0457057	0.161761	1.82341
para	TRUE	FALSE	NA	NA	NA	NA	NA	NA	NA	NA	NA	NA	TRUE	FALSE	NA	NA	NA	NA	NA	NA	NA	NA	NA	NA	NA	0.832688	3.85505	0.731493	1.61827	0.782091	2.73666	1.80701	0.00750358	0.0349484	0.00659564	0.014653	0.00704961	0.0248007	1.81477
CG9826	TRUE	FALSE	NA	NA	NA	NA	NA	NA	NA	NA	NA	NA	TRUE	FALSE	NA	NA	NA	NA	NA	NA	NA	NA	NA	NA	NA	0.952914	0	0	3.33537	0.476457	1.66769	1.80743	0.0329289	0	0	0.115814	0.0164645	0.0579069	1.81438
pHCl	TRUE	FALSE	NA	NA	NA	NA	NA	NA	NA	NA	NA	NA	TRUE	FALSE	NA	NA	NA	NA	NA	NA	NA	NA	NA	NA	NA	0.876439	2.09752	0	0.955884	0.438219	1.5267	1.80069	0.0169031	0.0406969	0	0.0185243	0.00845156	0.0296106	1.80883
CG14111	TRUE	FALSE	NA	NA	NA	NA	NA	NA	NA	NA	NA	NA	TRUE	FALSE	NA	NA	NA	NA	NA	NA	NA	NA	NA	NA	NA	0.848397	2.03041	0	0.925301	0.424199	1.47786	1.80069	0.0890199	0.21433	0	0.0975579	0.04451	0.155944	1.80883
CR44241	FALSE	FALSE	NA	NA	NA	NA	NA	NA	NA	NA	NA	NA	FALSE	FALSE	NA	NA	NA	NA	NA	NA	NA	NA	NA	NA	NA	1.69679	4.06082	0	1.8506	0.848397	2.95571	1.80069	0.339788	0.818093	0	0.372377	0.169894	0.595235	1.80883
sinah	TRUE	FALSE	NA	NA	NA	NA	NA	NA	NA	NA	NA	NA	TRUE	FALSE	NA	NA	NA	NA	NA	NA	NA	NA	NA	NA	NA	0.848397	2.03041	0	0.925301	0.424199	1.47786	1.80069	0.0400623	0.0964562	0	0.0439047	0.0200311	0.0701805	1.80883
CG11841	TRUE	FALSE	NA	NA	NA	NA	NA	NA	NA	NA	NA	NA	TRUE	FALSE	NA	NA	NA	NA	NA	NA	NA	NA	NA	NA	NA	0.848397	2.03041	0	0.925301	0.424199	1.47786	1.80069	0.0571471	0.137591	0	0.0626281	0.0285735	0.100109	1.80883
CG30060	TRUE	FALSE	NA	NA	NA	NA	NA	NA	NA	NA	NA	NA	TRUE	FALSE	NA	NA	NA	NA	NA	NA	NA	NA	NA	NA	NA	0.848397	2.03041	0	0.925301	0.424199	1.47786	1.80069	0.106408	0.256195	0	0.116614	0.0532042	0.186404	1.80883
CG31778	TRUE	FALSE	NA	NA	NA	NA	NA	NA	NA	NA	NA	NA	TRUE	FALSE	NA	NA	NA	NA	NA	NA	NA	NA	NA	NA	NA	0.977605	2.33963	0	1.06622	0.488802	1.70293	1.80069	0.0697053	0.167826	0	0.0763908	0.0348526	0.122109	1.80883
CG32206	TRUE	FALSE	NA	NA	NA	NA	NA	NA	NA	NA	NA	NA	TRUE	FALSE	NA	NA	NA	NA	NA	NA	NA	NA	NA	NA	NA	0.848397	2.03041	0	0.925301	0.424199	1.47786	1.80069	0.00708577	0.0170601	0	0.00776538	0.00354289	0.0124128	1.80883
CG6690	TRUE	FALSE	NA	NA	NA	NA	NA	NA	NA	NA	NA	NA	TRUE	FALSE	NA	NA	NA	NA	NA	NA	NA	NA	NA	NA	NA	0.848397	2.03041	0	0.925301	0.424199	1.47786	1.80069	0.0317805	0.0765166	0	0.0348286	0.0158902	0.0556726	1.80883
CG8349	TRUE	FALSE	NA	NA	NA	NA	NA	NA	NA	NA	NA	NA	TRUE	FALSE	NA	NA	NA	NA	NA	NA	NA	NA	NA	NA	NA	0.848397	2.03041	0	0.925301	0.424199	1.47786	1.80069	0.0687491	0.165524	0	0.0753429	0.0343745	0.120434	1.80883
CR44982	FALSE	FALSE	NA	NA	NA	NA	NA	NA	NA	NA	NA	NA	FALSE	FALSE	NA	NA	NA	NA	NA	NA	NA	NA	NA	NA	NA	0.848397	2.03041	0	0.925301	0.424199	1.47786	1.80069	0.143196	0.344767	0	0.15693	0.0715979	0.250848	1.80883
esn	TRUE	FALSE	NA	NA	NA	NA	NA	NA	NA	NA	NA	NA	TRUE	FALSE	NA	NA	NA	NA	NA	NA	NA	NA	NA	NA	NA	0.883158	2.1136	0	0.963213	0.441579	1.53841	1.80069	0.0132481	0.031897	0	0.0145188	0.00662407	0.0232079	1.80883
Or43a	TRUE	FALSE	NA	NA	NA	NA	NA	NA	NA	NA	NA	NA	TRUE	FALSE	NA	NA	NA	NA	NA	NA	NA	NA	NA	NA	NA	0.848397	2.03041	0	0.925301	0.424199	1.47786	1.80069	0.037626	0.0905906	0	0.0412348	0.018813	0.0659127	1.80883
CG11905	TRUE	FALSE	NA	NA	NA	NA	NA	NA	NA	NA	NA	NA	TRUE	FALSE	NA	NA	NA	NA	NA	NA	NA	NA	NA	NA	NA	1.80908	1.20764	0	5.04683	0.904541	3.12723	1.78963	0.0775819	0.0521014	0	0.217476	0.0387909	0.134789	1.79691
Gr64c	TRUE	FALSE	NA	NA	NA	NA	NA	NA	NA	NA	NA	NA	TRUE	FALSE	NA	NA	NA	NA	NA	NA	NA	NA	NA	NA	NA	1.88314	3.766	0	2.72903	0.94157	3.24751	1.78619	0.055594	0.11185	0	0.0809552	0.027797	0.0964026	1.79414
CG9194	TRUE	FALSE	NA	NA	NA	NA	NA	NA	NA	NA	NA	NA	TRUE	FALSE	NA	NA	NA	NA	NA	NA	NA	NA	NA	NA	NA	2.54519	5.07602	0	3.7012	1.2726	4.38861	1.78599	0.0541814	0.108708	0	0.0791706	0.0270907	0.0939395	1.79394
CG31259	TRUE	FALSE	NA	NA	NA	NA	NA	NA	NA	NA	NA	NA	TRUE	FALSE	NA	NA	NA	NA	NA	NA	NA	NA	NA	NA	NA	1.96562	0	1.45356	11.7909	1.70959	5.89543	1.78595	0.0582765	0	0.0431211	0.351263	0.0506988	0.175631	1.79253
bw	TRUE	FALSE	NA	NA	NA	NA	NA	NA	NA	NA	NA	NA	TRUE	FALSE	NA	NA	NA	NA	NA	NA	NA	NA	NA	NA	NA	0.892681	4.27278	1.19547	2.9208	1.04407	3.59679	1.78449	0.0217998	0.104973	0.0292116	0.071672	0.0255057	0.0883225	1.79196
CG17193	TRUE	FALSE	NA	NA	NA	NA	NA	NA	NA	NA	NA	NA	TRUE	FALSE	NA	NA	NA	NA	NA	NA	NA	NA	NA	NA	NA	0.848205	3.04495	1.38401	4.62548	1.11611	3.83522	1.78083	0.013484	0.0486976	0.0220149	0.0738865	0.0177494	0.061292	1.78793
CG6244	TRUE	FALSE	NA	NA	NA	NA	NA	NA	NA	NA	NA	NA	TRUE	FALSE	NA	NA	NA	NA	NA	NA	NA	NA	NA	NA	NA	1.69679	3.04561	0	2.7759	0.848397	2.91076	1.77858	0.323346	0.58388	0	0.531538	0.161673	0.557709	1.78643
ItgalphaPS5	TRUE	FALSE	NA	NA	NA	NA	NA	NA	NA	NA	NA	NA	TRUE	FALSE	NA	NA	NA	NA	NA	NA	NA	NA	NA	NA	NA	1.69679	9.13684	1.25477	0.925301	1.47578	5.03107	1.76939	0.033323	0.180518	0.024657	0.0182595	0.02899	0.0993889	1.77753
CG14591	TRUE	FALSE	NA	NA	NA	NA	NA	NA	NA	NA	NA	NA	TRUE	FALSE	NA	NA	NA	NA	NA	NA	NA	NA	NA	NA	NA	0	2.1143	1.18692	1.92706	0.593461	2.02068	1.76762	0	0.0845005	0.0471808	0.0769254	0.0235904	0.0807129	1.7746
Oatp33Eb	TRUE	FALSE	NA	NA	NA	NA	NA	NA	NA	NA	NA	NA	TRUE	FALSE	NA	NA	NA	NA	NA	NA	NA	NA	NA	NA	NA	0.848397	3.04561	2.50954	8.32771	1.67897	5.68666	1.76001	0.0197004	0.0711477	0.0583083	0.194309	0.0390043	0.132728	1.76677
CG7409	TRUE	FALSE	NA	NA	NA	NA	NA	NA	NA	NA	NA	NA	TRUE	FALSE	NA	NA	NA	NA	NA	NA	NA	NA	NA	NA	NA	1.69679	8.12164	1.25477	1.8506	1.47578	4.98612	1.75644	0.178675	0.860374	0.132208	0.195811	0.155441	0.528093	1.76442
Hdc	TRUE	FALSE	NA	NA	NA	NA	NA	NA	NA	NA	NA	NA	TRUE	FALSE	NA	NA	NA	NA	NA	NA	NA	NA	NA	NA	NA	0.858481	1.02727	0	1.8726	0.42924	1.44993	1.75613	0.0163197	0.0196461	0	0.0357698	0.00815984	0.027708	1.76369
Obp57d	TRUE	FALSE	NA	NA	NA	NA	NA	NA	NA	NA	NA	NA	TRUE	FALSE	NA	NA	NA	NA	NA	NA	NA	NA	NA	NA	NA	0.657199	0.786414	0	1.43354	0.328599	1.10998	1.75613	0.0301188	0.0362579	0	0.066015	0.0150594	0.0511364	1.76369
CG13196	TRUE	FALSE	NA	NA	NA	NA	NA	NA	NA	NA	NA	NA	TRUE	FALSE	NA	NA	NA	NA	NA	NA	NA	NA	NA	NA	NA	0.848397	1.0152	0	1.8506	0.424199	1.4329	1.75613	0.027327	0.0328971	0	0.059896	0.0136635	0.0463966	1.76369
CR44560	FALSE	FALSE	NA	NA	NA	NA	NA	NA	NA	NA	NA	NA	FALSE	FALSE	NA	NA	NA	NA	NA	NA	NA	NA	NA	NA	NA	0.848397	1.0152	0	1.8506	0.424199	1.4329	1.75613	0.0722163	0.0869361	0	0.158285	0.0361081	0.122611	1.76369
CG11893	TRUE	FALSE	NA	NA	NA	NA	NA	NA	NA	NA	NA	NA	TRUE	FALSE	NA	NA	NA	NA	NA	NA	NA	NA	NA	NA	NA	2.54519	3.04561	0	5.55181	1.2726	4.29871	1.75613	0.123646	0.148849	0	0.27101	0.0618231	0.20993	1.76369
CG13337	TRUE	FALSE	NA	NA	NA	NA	NA	NA	NA	NA	NA	NA	TRUE	FALSE	NA	NA	NA	NA	NA	NA	NA	NA	NA	NA	NA	0.944129	1.12976	0	2.05942	0.472065	1.59459	1.75613	0.0251343	0.0302574	0	0.0550899	0.0125672	0.0426737	1.76369
CG6018	TRUE	FALSE	NA	NA	NA	NA	NA	NA	NA	NA	NA	NA	TRUE	FALSE	NA	NA	NA	NA	NA	NA	NA	NA	NA	NA	NA	0.848397	1.0152	0	1.8506	0.424199	1.4329	1.75613	0.0285409	0.0343584	0	0.0625566	0.0142704	0.0484575	1.76369
CG6901	TRUE	FALSE	NA	NA	NA	NA	NA	NA	NA	NA	NA	NA	TRUE	FALSE	NA	NA	NA	NA	NA	NA	NA	NA	NA	NA	NA	0.848397	1.0152	0	1.8506	0.424199	1.4329	1.75613	0.0362647	0.0436565	0	0.0794859	0.0181324	0.0615712	1.76369
CG9289	TRUE	FALSE	NA	NA	NA	NA	NA	NA	NA	NA	NA	NA	TRUE	FALSE	NA	NA	NA	NA	NA	NA	NA	NA	NA	NA	NA	0.848397	1.0152	0	1.8506	0.424199	1.4329	1.75613	0.0259678	0.0312608	0	0.0569168	0.0129839	0.0440888	1.76369
VhaAC39-2	TRUE	FALSE	NA	NA	NA	NA	NA	NA	NA	NA	NA	NA	TRUE	FALSE	NA	NA	NA	NA	NA	NA	NA	NA	NA	NA	NA	0.848397	1.0152	0	1.8506	0.424199	1.4329	1.75613	0.04847	0.0583496	0	0.106238	0.024235	0.0822936	1.76369
CG13833	TRUE	FALSE	NA	NA	NA	NA	NA	NA	NA	NA	NA	NA	TRUE	FALSE	NA	NA	NA	NA	NA	NA	NA	NA	NA	NA	NA	0.848397	1.0152	0	1.8506	0.424199	1.4329	1.75613	0.0571471	0.0687953	0	0.125256	0.0285735	0.0970258	1.76369
CG14448	TRUE	FALSE	NA	NA	NA	NA	NA	NA	NA	NA	NA	NA	TRUE	FALSE	NA	NA	NA	NA	NA	NA	NA	NA	NA	NA	NA	0.848397	1.0152	0	1.8506	0.424199	1.4329	1.75613	0.0821609	0.0989077	0	0.180082	0.0410805	0.139495	1.76369
CG15731	TRUE	FALSE	NA	NA	NA	NA	NA	NA	NA	NA	NA	NA	TRUE	FALSE	NA	NA	NA	NA	NA	NA	NA	NA	NA	NA	NA	1.69679	2.03041	0	3.7012	0.848397	2.86581	1.75613	0.102177	0.123004	0	0.223955	0.0510886	0.173479	1.76369
CG43290	TRUE	FALSE	NA	NA	NA	NA	NA	NA	NA	NA	NA	NA	TRUE	FALSE	NA	NA	NA	NA	NA	NA	NA	NA	NA	NA	NA	0.848397	1.0152	0	1.8506	0.424199	1.4329	1.75613	0.130178	0.156712	0	0.285327	0.0650889	0.221019	1.76369
CG44158	TRUE	FALSE	NA	NA	NA	NA	NA	NA	NA	NA	NA	NA	TRUE	FALSE	NA	NA	NA	NA	NA	NA	NA	NA	NA	NA	NA	0.848397	1.0152	0	1.8506	0.424199	1.4329	1.75613	0.164324	0.197818	0	0.360168	0.0821618	0.278993	1.76369
CG13311	TRUE	FALSE	NA	NA	NA	NA	NA	NA	NA	NA	NA	NA	TRUE	FALSE	NA	NA	NA	NA	NA	NA	NA	NA	NA	NA	NA	1.69679	2.03041	0	3.7012	0.848397	2.86581	1.75613	0.271645	0.327014	0	0.595398	0.135823	0.461206	1.76369
Gr64b	TRUE	FALSE	NA	NA	NA	NA	NA	NA	NA	NA	NA	NA	TRUE	FALSE	NA	NA	NA	NA	NA	NA	NA	NA	NA	NA	NA	0.857098	1.02562	0	1.86958	0.428549	1.4476	1.75613	0.0190417	0.0229229	0	0.0417359	0.00952083	0.0323294	1.76369
CG31792	TRUE	FALSE	NA	NA	NA	NA	NA	NA	NA	NA	NA	NA	TRUE	FALSE	NA	NA	NA	NA	NA	NA	NA	NA	NA	NA	NA	0.864531	1.03444	0	1.88566	0.432265	1.46005	1.75603	0.0124124	0.0149413	0	0.0272038	0.0062062	0.0210726	1.76359
Cdk5alpha	TRUE	FALSE	NA	NA	NA	NA	NA	NA	NA	NA	NA	NA	TRUE	FALSE	NA	NA	NA	NA	NA	NA	NA	NA	NA	NA	NA	0.894934	4.82512	1.3236	2.63869	1.10927	3.7319	1.75031	0.0302097	0.16386	0.0447066	0.0895025	0.0374581	0.126681	1.75785
TpnC41C	TRUE	FALSE	NA	NA	NA	NA	NA	NA	NA	NA	NA	NA	TRUE	FALSE	NA	NA	NA	NA	NA	NA	NA	NA	NA	NA	NA	1.57063	7.51777	0.859527	0.633838	1.21508	4.07581	1.74603	0.0805758	0.387998	0.0441215	0.0326738	0.0623487	0.210336	1.75426
CG14642	TRUE	FALSE	NA	NA	NA	NA	NA	NA	NA	NA	NA	NA	TRUE	FALSE	NA	NA	NA	NA	NA	NA	NA	NA	NA	NA	NA	1.75225	0	1.29578	10.191	1.52401	5.09551	1.74135	0.0935909	0	0.0692516	0.546951	0.0814212	0.273475	1.74793
Snmp2	TRUE	FALSE	NA	NA	NA	NA	NA	NA	NA	NA	NA	NA	TRUE	FALSE	NA	NA	NA	NA	NA	NA	NA	NA	NA	NA	NA	1.80601	6.4833	1.25477	3.7012	1.53039	5.09225	1.7344	0.0467517	0.168843	0.0325014	0.0962746	0.0396265	0.132559	1.74209
CG9129	TRUE	FALSE	NA	NA	NA	NA	NA	NA	NA	NA	NA	NA	TRUE	FALSE	NA	NA	NA	NA	NA	NA	NA	NA	NA	NA	NA	0.848397	5.07602	1.25477	1.8506	1.05158	3.46331	1.71959	0.0566946	0.341253	0.083901	0.124264	0.0702978	0.232759	1.72728
CG11835	TRUE	FALSE	NA	NA	NA	NA	NA	NA	NA	NA	NA	NA	TRUE	FALSE	NA	NA	NA	NA	NA	NA	NA	NA	NA	NA	NA	2.60132	5.20356	1.28244	7.56565	1.94188	6.38461	1.71714	0.060286	0.12132	0.0297386	0.176182	0.0450123	0.148751	1.72451
Ir40a	TRUE	FALSE	NA	NA	NA	NA	NA	NA	NA	NA	NA	NA	TRUE	FALSE	NA	NA	NA	NA	NA	NA	NA	NA	NA	NA	NA	5.11418	9.06422	1.34486	12.1642	3.22952	10.6142	1.7166	0.293314	0.522995	0.0771784	0.70102	0.185246	0.612008	1.7241
Sox21b	TRUE	FALSE	NA	NA	NA	NA	NA	NA	NA	NA	NA	NA	TRUE	FALSE	NA	NA	NA	NA	NA	NA	NA	NA	NA	NA	NA	1.03997	2.48889	0	0.925301	0.519986	1.7071	1.715	0.0204646	0.0492717	0	0.018296	0.0102323	0.0337839	1.72321
CG13704	TRUE	FALSE	NA	NA	NA	NA	NA	NA	NA	NA	NA	NA	TRUE	FALSE	NA	NA	NA	NA	NA	NA	NA	NA	NA	NA	NA	0.848397	0	0	2.7759	0.424199	1.38795	1.71015	0.103765	0	0	0.34115	0.0518823	0.170575	1.71709
CG11289	TRUE	FALSE	NA	NA	NA	NA	NA	NA	NA	NA	NA	NA	TRUE	FALSE	NA	NA	NA	NA	NA	NA	NA	NA	NA	NA	NA	0.848397	0	0	2.7759	0.424199	1.38795	1.71015	0.0381415	0	0	0.125399	0.0190707	0.0626995	1.71709
CG30056	TRUE	FALSE	NA	NA	NA	NA	NA	NA	NA	NA	NA	NA	TRUE	FALSE	NA	NA	NA	NA	NA	NA	NA	NA	NA	NA	NA	0.848397	0	0	2.7759	0.424199	1.38795	1.71015	0.126243	0	0	0.415053	0.0631215	0.207527	1.71709
CG9555	TRUE	FALSE	NA	NA	NA	NA	NA	NA	NA	NA	NA	NA	TRUE	FALSE	NA	NA	NA	NA	NA	NA	NA	NA	NA	NA	NA	1.88479	0	0	6.16691	0.942394	3.08345	1.71015	0.0957363	0	0	0.314755	0.0478681	0.157378	1.71709
CG13318	TRUE	FALSE	NA	NA	NA	NA	NA	NA	NA	NA	NA	NA	TRUE	FALSE	NA	NA	NA	NA	NA	NA	NA	NA	NA	NA	NA	0.848397	0	0	2.7759	0.424199	1.38795	1.71015	0.0467518	0	0	0.153707	0.0233759	0.0768537	1.71709
CG3769	TRUE	FALSE	NA	NA	NA	NA	NA	NA	NA	NA	NA	NA	TRUE	FALSE	NA	NA	NA	NA	NA	NA	NA	NA	NA	NA	NA	0.848397	0	0	2.7759	0.424199	1.38795	1.71015	0.0441957	0	0	0.145304	0.0220978	0.0726518	1.71709
Klp54D	TRUE	FALSE	NA	NA	NA	NA	NA	NA	NA	NA	NA	NA	TRUE	FALSE	NA	NA	NA	NA	NA	NA	NA	NA	NA	NA	NA	0.865041	0	0	2.83036	0.43252	1.41518	1.71015	0.0245796	0	0	0.0808112	0.0122898	0.0404056	1.71709
CG14509	TRUE	FALSE	NA	NA	NA	NA	NA	NA	NA	NA	NA	NA	TRUE	FALSE	NA	NA	NA	NA	NA	NA	NA	NA	NA	NA	NA	2.72762	6.52783	2.01706	8.92461	2.37234	7.72622	1.70345	0.0519355	0.125043	0.0384291	0.17075	0.0451823	0.147897	1.71076
CG10799	TRUE	FALSE	NA	NA	NA	NA	NA	NA	NA	NA	NA	NA	TRUE	FALSE	NA	NA	NA	NA	NA	NA	NA	NA	NA	NA	NA	0	4.06082	1.25477	0	0.627385	2.03041	1.69435	0	0.614087	0.188726	0	0.0943628	0.307044	1.70215
CG11160	TRUE	FALSE	NA	NA	NA	NA	NA	NA	NA	NA	NA	NA	TRUE	FALSE	NA	NA	NA	NA	NA	NA	NA	NA	NA	NA	NA	0	4.08869	1.26338	0	0.631691	2.04434	1.69435	0	0.12742	0.0391595	0	0.0195798	0.0637098	1.70215
CG31300	TRUE	FALSE	NA	NA	NA	NA	NA	NA	NA	NA	NA	NA	TRUE	FALSE	NA	NA	NA	NA	NA	NA	NA	NA	NA	NA	NA	2.54519	3.04561	1.25477	9.25301	1.89998	6.14931	1.69444	0.117924	0.141961	0.0581712	0.430782	0.0880478	0.286372	1.70153
DNaseII	TRUE	FALSE	NA	NA	NA	NA	NA	NA	NA	NA	NA	NA	TRUE	FALSE	NA	NA	NA	NA	NA	NA	NA	NA	NA	NA	NA	0.848397	3.04561	1.25477	3.7012	1.05158	3.37341	1.68164	0.0487055	0.175899	0.0720782	0.213508	0.0603918	0.194703	1.68885
CG9593	TRUE	FALSE	NA	NA	NA	NA	NA	NA	NA	NA	NA	NA	TRUE	FALSE	NA	NA	NA	NA	NA	NA	NA	NA	NA	NA	NA	0	6.09123	2.50954	1.8506	1.25477	3.97092	1.66205	0	0.338002	0.138503	0.102567	0.0692516	0.220285	1.66945
Oseg2	TRUE	FALSE	NA	NA	NA	NA	NA	NA	NA	NA	NA	NA	TRUE	FALSE	NA	NA	NA	NA	NA	NA	NA	NA	NA	NA	NA	0	3.04561	1.25477	0.925301	0.627385	1.98546	1.66205	0	0.0357283	0.0146404	0.0108418	0.00732018	0.023285	1.66945
CG14107	TRUE	FALSE	NA	NA	NA	NA	NA	NA	NA	NA	NA	NA	TRUE	FALSE	NA	NA	NA	NA	NA	NA	NA	NA	NA	NA	NA	0	3.04561	1.25477	0.925301	0.627385	1.98546	1.66205	0	0.249312	0.102161	0.0756542	0.0510803	0.162483	1.66945
MtnE	TRUE	FALSE	NA	NA	NA	NA	NA	NA	NA	NA	NA	NA	TRUE	FALSE	NA	NA	NA	NA	NA	NA	NA	NA	NA	NA	NA	0	5.7673	2.37608	1.75219	1.18804	3.75974	1.66205	0	1.24569	0.510445	0.378006	0.255223	0.811848	1.66945
CG13869	TRUE	FALSE	NA	NA	NA	NA	NA	NA	NA	NA	NA	NA	TRUE	FALSE	NA	NA	NA	NA	NA	NA	NA	NA	NA	NA	NA	0.848397	2.03041	1.25477	4.6265	1.05158	3.32846	1.66229	0.0904661	0.217811	0.133879	0.495714	0.112172	0.356763	1.66925
CG6012	TRUE	FALSE	NA	NA	NA	NA	NA	NA	NA	NA	NA	NA	TRUE	FALSE	NA	NA	NA	NA	NA	NA	NA	NA	NA	NA	NA	0.848397	2.03041	1.25477	4.6265	1.05158	3.32846	1.66229	0.0595226	0.14331	0.0880861	0.326157	0.0738044	0.234734	1.66925
CG15831	TRUE	FALSE	NA	NA	NA	NA	NA	NA	NA	NA	NA	NA	TRUE	FALSE	NA	NA	NA	NA	NA	NA	NA	NA	NA	NA	NA	0	8.12164	3.76431	3.7012	1.88216	5.91142	1.65112	0	0.490018	0.225894	0.223045	0.112947	0.356532	1.65839
CG6972	TRUE	FALSE	NA	NA	NA	NA	NA	NA	NA	NA	NA	NA	TRUE	FALSE	NA	NA	NA	NA	NA	NA	NA	NA	NA	NA	NA	0.848397	4.06082	2.50954	6.47711	1.67897	5.26896	1.64994	0.0453146	0.218204	0.13412	0.347625	0.0897173	0.282915	1.65691
CG15067	TRUE	FALSE	NA	NA	NA	NA	NA	NA	NA	NA	NA	NA	TRUE	FALSE	NA	NA	NA	NA	NA	NA	NA	NA	NA	NA	NA	0	6.78466	3.35427	3.71029	1.67714	5.24748	1.64562	0	0.985855	0.484768	0.538487	0.242384	0.762171	1.65282
CG42319	TRUE	FALSE	NA	NA	NA	NA	NA	NA	NA	NA	NA	NA	TRUE	FALSE	NA	NA	NA	NA	NA	NA	NA	NA	NA	NA	NA	0.706774	4.4515	0.717058	0	0.711916	2.22575	1.64451	0.0395563	0.250641	0.0401561	0	0.0398562	0.125321	1.65275
CG3285	TRUE	FALSE	NA	NA	NA	NA	NA	NA	NA	NA	NA	NA	TRUE	FALSE	NA	NA	NA	NA	NA	NA	NA	NA	NA	NA	NA	2.57801	6.16977	0	1.87446	1.289	4.02212	1.6417	0.107703	0.259312	0	0.0786887	0.0538516	0.169001	1.64997
CG5791	TRUE	FALSE	NA	NA	NA	NA	NA	NA	NA	NA	NA	NA	TRUE	FALSE	NA	NA	NA	NA	NA	NA	NA	NA	NA	NA	NA	1.33621	9.59357	1.97624	0.67784	1.65622	5.13571	1.63266	0.250587	1.80999	0.370839	0.127733	0.310713	0.96886	1.64071
eIF4E-7	TRUE	FALSE	NA	NA	NA	NA	NA	NA	NA	NA	NA	NA	TRUE	FALSE	NA	NA	NA	NA	NA	NA	NA	NA	NA	NA	NA	0	2.03041	1.25477	1.8506	0.627385	1.94051	1.62901	0	0.0838545	0.0515416	0.0763374	0.0257708	0.0800959	1.63599
CG42299	TRUE	FALSE	NA	NA	NA	NA	NA	NA	NA	NA	NA	NA	TRUE	FALSE	NA	NA	NA	NA	NA	NA	NA	NA	NA	NA	NA	0	2.03041	1.25477	1.8506	0.627385	1.94051	1.62901	0	0.251391	0.154519	0.228855	0.0772593	0.240123	1.63599
CG5955	TRUE	FALSE	NA	NA	NA	NA	NA	NA	NA	NA	NA	NA	TRUE	FALSE	NA	NA	NA	NA	NA	NA	NA	NA	NA	NA	NA	0	2.03041	1.25477	1.8506	0.627385	1.94051	1.62901	0	0.108221	0.0665187	0.0985198	0.0332594	0.103371	1.63599
CR44161	FALSE	FALSE	NA	NA	NA	NA	NA	NA	NA	NA	NA	NA	FALSE	FALSE	NA	NA	NA	NA	NA	NA	NA	NA	NA	NA	NA	0	4.41769	2.73008	4.02647	1.36504	4.22208	1.62901	0	0.731324	0.449512	0.665764	0.224756	0.698544	1.63599
CR44317	FALSE	FALSE	NA	NA	NA	NA	NA	NA	NA	NA	NA	NA	FALSE	FALSE	NA	NA	NA	NA	NA	NA	NA	NA	NA	NA	NA	0	1.67802	1.03699	1.52941	0.518497	1.60371	1.62901	0	0.103934	0.0638832	0.0946163	0.0319416	0.0992749	1.63599
Mur89F	TRUE	FALSE	NA	NA	NA	NA	NA	NA	NA	NA	NA	NA	TRUE	FALSE	NA	NA	NA	NA	NA	NA	NA	NA	NA	NA	NA	0	2.03052	1.25484	1.8507	0.627419	1.94061	1.62901	0	0.0169163	0.0103977	0.0153998	0.00519886	0.0161581	1.63599
Whamy	TRUE	FALSE	NA	NA	NA	NA	NA	NA	NA	NA	NA	NA	TRUE	FALSE	NA	NA	NA	NA	NA	NA	NA	NA	NA	NA	NA	2.54515	10.4852	5.75978	14.8659	4.15246	12.6756	1.61001	0.0802298	0.332515	0.181673	0.470876	0.130951	0.401695	1.61707
disco	TRUE	FALSE	NA	NA	NA	NA	NA	NA	NA	NA	NA	NA	TRUE	FALSE	NA	NA	NA	NA	NA	NA	NA	NA	NA	NA	NA	1.75004	8.3765	1.29415	0.897979	1.52209	4.63724	1.60721	0.0349496	0.168293	0.0258606	0.0180199	0.0304051	0.0931567	1.61535
CG13842	TRUE	FALSE	NA	NA	NA	NA	NA	NA	NA	NA	NA	NA	TRUE	FALSE	NA	NA	NA	NA	NA	NA	NA	NA	NA	NA	NA	0	1.0152	1.25477	2.7759	0.627385	1.89555	1.5952	0	0.0261749	0.0321771	0.0714854	0.0160885	0.0488302	1.60174
CG13646	TRUE	FALSE	NA	NA	NA	NA	NA	NA	NA	NA	NA	NA	TRUE	FALSE	NA	NA	NA	NA	NA	NA	NA	NA	NA	NA	NA	0	1.0152	1.25477	2.7759	0.627385	1.89555	1.5952	0	0.043562	0.0535511	0.118971	0.0267756	0.0812663	1.60174
CG13894	TRUE	FALSE	NA	NA	NA	NA	NA	NA	NA	NA	NA	NA	TRUE	FALSE	NA	NA	NA	NA	NA	NA	NA	NA	NA	NA	NA	0	1.0152	1.25477	2.7759	0.627385	1.89555	1.5952	0	0.0302574	0.0371957	0.0826349	0.0185978	0.0564461	1.60174
CG14990	TRUE	FALSE	NA	NA	NA	NA	NA	NA	NA	NA	NA	NA	TRUE	FALSE	NA	NA	NA	NA	NA	NA	NA	NA	NA	NA	NA	0	1.0152	1.25477	2.7759	0.627385	1.89555	1.5952	0	0.0691106	0.0849582	0.188745	0.0424791	0.128928	1.60174
CG3713	TRUE	FALSE	NA	NA	NA	NA	NA	NA	NA	NA	NA	NA	TRUE	FALSE	NA	NA	NA	NA	NA	NA	NA	NA	NA	NA	NA	0	1.83649	2.26986	5.02157	1.13493	3.42903	1.5952	0	0.200446	0.24641	0.547432	0.123205	0.373939	1.60174
Gr39a	TRUE	FALSE	NA	NA	NA	NA	NA	NA	NA	NA	NA	NA	TRUE	FALSE	NA	NA	NA	NA	NA	NA	NA	NA	NA	NA	NA	0	2.00146	1.27735	1.82422	0.638674	1.91284	1.58257	0	0.12742	0.0808817	0.115998	0.0404408	0.121709	1.58955
CG7227	TRUE	FALSE	NA	NA	NA	NA	NA	NA	NA	NA	NA	NA	TRUE	FALSE	NA	NA	NA	NA	NA	NA	NA	NA	NA	NA	NA	2.73255	3.26981	1.34714	8.94074	2.03985	6.10528	1.5816	0.0779437	0.0938309	0.038449	0.256258	0.0581964	0.175045	1.58872
Rab3-GEF	TRUE	FALSE	NA	NA	NA	NA	NA	NA	NA	NA	NA	NA	TRUE	FALSE	NA	NA	NA	NA	NA	NA	NA	NA	NA	NA	NA	4.90893	13.549	5.06664	16.0617	4.98779	14.8054	1.56965	0.035671	0.0990481	0.0368391	0.117277	0.036255	0.108162	1.57695
SP2353	TRUE	FALSE	NA	NA	NA	NA	NA	NA	NA	NA	NA	NA	TRUE	FALSE	NA	NA	NA	NA	NA	NA	NA	NA	NA	NA	NA	3.18868	10.8492	2.68188	6.56884	2.93528	8.70903	1.56901	0.0331631	0.113515	0.027909	0.0686474	0.030536	0.0910811	1.57664
ppk13	TRUE	FALSE	NA	NA	NA	NA	NA	NA	NA	NA	NA	NA	TRUE	FALSE	NA	NA	NA	NA	NA	NA	NA	NA	NA	NA	NA	2.54519	12.1825	2.50954	2.7759	2.52737	7.47918	1.56525	0.114337	0.550571	0.112804	0.125304	0.11357	0.337937	1.57317
Slob	TRUE	FALSE	NA	NA	NA	NA	NA	NA	NA	NA	NA	NA	TRUE	FALSE	NA	NA	NA	NA	NA	NA	NA	NA	NA	NA	NA	0.953738	1.77746	0	1.04019	0.476869	1.40882	1.56283	0.023934	0.0448741	0	0.0262295	0.011967	0.0355518	1.57086
eyg	TRUE	FALSE	NA	NA	NA	NA	NA	NA	NA	NA	NA	NA	TRUE	FALSE	NA	NA	NA	NA	NA	NA	NA	NA	NA	NA	NA	0.871837	2.57364	0	0	0.435919	1.28682	1.56168	0.0206671	0.0613766	0	0	0.0103336	0.0306883	1.57035
Alk	TRUE	FALSE	NA	NA	NA	NA	NA	NA	NA	NA	NA	NA	TRUE	FALSE	NA	NA	NA	NA	NA	NA	NA	NA	NA	NA	NA	0	0.974003	1.31019	2.89851	0.655097	1.93626	1.56349	0	0.00655581	0.00877105	0.019486	0.00438553	0.0130209	1.57001
CG15865	TRUE	FALSE	NA	NA	NA	NA	NA	NA	NA	NA	NA	NA	TRUE	FALSE	NA	NA	NA	NA	NA	NA	NA	NA	NA	NA	NA	0	0	1.25477	3.7012	0.627385	1.8506	1.56057	0	0	0.0229623	0.0680181	0.0114811	0.034009	1.56665
Cyp309a1	TRUE	FALSE	NA	NA	NA	NA	NA	NA	NA	NA	NA	NA	TRUE	FALSE	NA	NA	NA	NA	NA	NA	NA	NA	NA	NA	NA	0	0	2.87087	8.46823	1.43544	4.23412	1.56057	0	0	0.106258	0.314755	0.0531292	0.157377	1.56665
CR45176	FALSE	FALSE	NA	NA	NA	NA	NA	NA	NA	NA	NA	NA	FALSE	FALSE	NA	NA	NA	NA	NA	NA	NA	NA	NA	NA	NA	0	0	1.25477	3.7012	0.627385	1.8506	1.56057	0	0	0.598165	1.77187	0.299083	0.885933	1.56665
CG14490	TRUE	FALSE	NA	NA	NA	NA	NA	NA	NA	NA	NA	NA	TRUE	FALSE	NA	NA	NA	NA	NA	NA	NA	NA	NA	NA	NA	1.69679	4.06082	0	0.925301	0.848397	2.49306	1.55511	0.195774	0.471358	0	0.107276	0.0978872	0.289317	1.56346
CG10970	TRUE	FALSE	NA	NA	NA	NA	NA	NA	NA	NA	NA	NA	TRUE	FALSE	NA	NA	NA	NA	NA	NA	NA	NA	NA	NA	NA	2.24211	1.77961	0	4.74518	1.12105	3.26239	1.54108	0.13245	0.105762	0	0.281669	0.0662248	0.193715	1.54849
pros	TRUE	FALSE	NA	NA	NA	NA	NA	NA	NA	NA	NA	NA	TRUE	FALSE	NA	NA	NA	NA	NA	NA	NA	NA	NA	NA	NA	4.72392	23.5764	6.98663	10.3042	5.85527	16.9403	1.53265	0.0188165	0.0944767	0.0278461	0.0412424	0.0233313	0.0678595	1.54029
CG14770	TRUE	FALSE	NA	NA	NA	NA	NA	NA	NA	NA	NA	NA	TRUE	FALSE	NA	NA	NA	NA	NA	NA	NA	NA	NA	NA	NA	1.69679	3.04561	0	1.8506	0.848397	2.44811	1.52886	0.204148	0.368639	0	0.223728	0.102074	0.296183	1.53688
CG15330	TRUE	FALSE	NA	NA	NA	NA	NA	NA	NA	NA	NA	NA	TRUE	FALSE	NA	NA	NA	NA	NA	NA	NA	NA	NA	NA	NA	1.69679	3.04561	0	1.8506	0.848397	2.44811	1.52886	0.227811	0.411368	0	0.24966	0.113905	0.330514	1.53688
Stalker3_LTR|Drosophila_fruit_fly_genus	FALSE	TRUE	NA	NA	NA	NA	NA	NA	NA	NA	NA	NA	FALSE	TRUE	NA	NA	NA	NA	NA	NA	NA	NA	NA	NA	NA	1.69679	3.04561	0	1.8506	0.848397	2.44811	1.52886	0.579242	1.04596	0	0.634798	0.289621	0.840381	1.53688
Ugt37a1	TRUE	FALSE	NA	NA	NA	NA	NA	NA	NA	NA	NA	NA	TRUE	FALSE	NA	NA	NA	NA	NA	NA	NA	NA	NA	NA	NA	1.70859	3.0508	0	1.85299	0.854295	2.45189	1.52109	0.0708795	0.127323	0	0.0772412	0.0354398	0.102282	1.52911
Tsp42Ec	TRUE	FALSE	NA	NA	NA	NA	NA	NA	NA	NA	NA	NA	TRUE	FALSE	NA	NA	NA	NA	NA	NA	NA	NA	NA	NA	NA	0.848397	0	5.01908	16.6554	2.93374	8.32771	1.50518	0.0606756	0	0.35917	1.19691	0.209923	0.598455	1.51139
CG7362	TRUE	FALSE	NA	NA	NA	NA	NA	NA	NA	NA	NA	NA	TRUE	FALSE	NA	NA	NA	NA	NA	NA	NA	NA	NA	NA	NA	3.39359	4.06082	0	5.55181	1.69679	4.80631	1.50212	0.0816583	0.0983026	0	0.134235	0.0408291	0.116269	1.5098
CG5715	TRUE	FALSE	NA	NA	NA	NA	NA	NA	NA	NA	NA	NA	TRUE	FALSE	NA	NA	NA	NA	NA	NA	NA	NA	NA	NA	NA	1.69679	2.03041	0	2.7759	0.848397	2.40316	1.50212	0.128673	0.1549	0	0.211521	0.0643364	0.18321	1.5098
fd59A	TRUE	FALSE	NA	NA	NA	NA	NA	NA	NA	NA	NA	NA	TRUE	FALSE	NA	NA	NA	NA	NA	NA	NA	NA	NA	NA	NA	1.69679	2.03041	0	2.7759	0.848397	2.40316	1.50212	0.0494015	0.0594709	0	0.0812094	0.0247007	0.0703402	1.5098
CG12269	TRUE	FALSE	NA	NA	NA	NA	NA	NA	NA	NA	NA	NA	TRUE	FALSE	NA	NA	NA	NA	NA	NA	NA	NA	NA	NA	NA	0.825508	6.91471	2.58111	2.70101	1.70331	4.80786	1.49706	0.180283	1.51921	0.564029	0.592724	0.372156	1.05597	1.50459
rdo	TRUE	FALSE	NA	NA	NA	NA	NA	NA	NA	NA	NA	NA	TRUE	FALSE	NA	NA	NA	NA	NA	NA	NA	NA	NA	NA	NA	0.854052	4.08788	1.26313	1.86294	1.05859	2.97541	1.49094	0.0139177	0.0670182	0.0205965	0.0305052	0.0172571	0.0487617	1.49856
CG17118	TRUE	FALSE	NA	NA	NA	NA	NA	NA	NA	NA	NA	NA	TRUE	FALSE	NA	NA	NA	NA	NA	NA	NA	NA	NA	NA	NA	0.848397	4.06082	1.25477	1.8506	1.05158	2.95571	1.49094	0.0642539	0.309403	0.0950879	0.140833	0.0796709	0.225118	1.49856
CG31975	TRUE	FALSE	NA	NA	NA	NA	NA	NA	NA	NA	NA	NA	TRUE	FALSE	NA	NA	NA	NA	NA	NA	NA	NA	NA	NA	NA	1.17364	5.61759	1.7358	2.56006	1.45472	4.08883	1.49094	0.0441179	0.212442	0.0652891	0.0966986	0.0547035	0.15457	1.49856
lectin-24Db	TRUE	FALSE	NA	NA	NA	NA	NA	NA	NA	NA	NA	NA	TRUE	FALSE	NA	NA	NA	NA	NA	NA	NA	NA	NA	NA	NA	0.848397	4.06082	1.25477	1.8506	1.05158	2.95571	1.49094	0.0520436	0.250606	0.0770181	0.11407	0.0645309	0.182338	1.49856
CR43148	FALSE	FALSE	NA	NA	NA	NA	NA	NA	NA	NA	NA	NA	FALSE	FALSE	NA	NA	NA	NA	NA	NA	NA	NA	NA	NA	NA	4.54252	16.3069	4.47889	8.99788	4.51071	12.6524	1.48799	0.294236	1.06263	0.290289	0.585641	0.292263	0.824136	1.49562
CG7135	TRUE	FALSE	NA	NA	NA	NA	NA	NA	NA	NA	NA	NA	TRUE	FALSE	NA	NA	NA	NA	NA	NA	NA	NA	NA	NA	NA	0	6.09123	2.50954	0.925301	1.25477	3.50826	1.48333	0	0.27445	0.112461	0.0416412	0.0562307	0.158046	1.49091
Oaz	TRUE	FALSE	NA	NA	NA	NA	NA	NA	NA	NA	NA	NA	TRUE	FALSE	NA	NA	NA	NA	NA	NA	NA	NA	NA	NA	NA	0.884883	7.80002	3.9262	5.57998	2.40554	6.69	1.47565	0.011344	0.100597	0.0503631	0.0718793	0.0308535	0.0862382	1.48289
CG34136	TRUE	FALSE	NA	NA	NA	NA	NA	NA	NA	NA	NA	NA	TRUE	FALSE	NA	NA	NA	NA	NA	NA	NA	NA	NA	NA	NA	1.69679	1.0152	0	3.7012	0.848397	2.3582	1.47488	0.197705	0.119002	0	0.433335	0.0988526	0.276168	1.4822
CG18823	TRUE	FALSE	NA	NA	NA	NA	NA	NA	NA	NA	NA	NA	TRUE	FALSE	NA	NA	NA	NA	NA	NA	NA	NA	NA	NA	NA	1.69679	1.0152	0	3.7012	0.848397	2.3582	1.47488	0.214181	0.128919	0	0.469446	0.10709	0.299183	1.4822
CG13565	TRUE	FALSE	NA	NA	NA	NA	NA	NA	NA	NA	NA	NA	TRUE	FALSE	NA	NA	NA	NA	NA	NA	NA	NA	NA	NA	NA	0.400845	1.06159	1.3121	3.7012	0.85647	2.38139	1.47533	0.0574748	0.153132	0.188247	0.533256	0.122861	0.343194	1.482
CG6123	TRUE	FALSE	NA	NA	NA	NA	NA	NA	NA	NA	NA	NA	TRUE	FALSE	NA	NA	NA	NA	NA	NA	NA	NA	NA	NA	NA	0	2.30548	1.42476	1.65334	0.712379	1.97941	1.47435	0	0.0254034	0.0156143	0.018196	0.00780717	0.0217997	1.48144
CG7794	TRUE	FALSE	NA	NA	NA	NA	NA	NA	NA	NA	NA	NA	TRUE	FALSE	NA	NA	NA	NA	NA	NA	NA	NA	NA	NA	NA	2.54519	4.06082	1.25477	6.47711	1.89998	5.26896	1.47153	0.111373	0.178765	0.0549395	0.284795	0.0831563	0.23178	1.47886
CG18327	TRUE	FALSE	NA	NA	NA	NA	NA	NA	NA	NA	NA	NA	TRUE	FALSE	NA	NA	NA	NA	NA	NA	NA	NA	NA	NA	NA	3.26412	6.34281	0	2.67	1.63206	4.5064	1.46528	0.23176	0.453068	0	0.190491	0.11588	0.321779	1.47344
CG33914	TRUE	FALSE	NA	NA	NA	NA	NA	NA	NA	NA	NA	NA	TRUE	FALSE	NA	NA	NA	NA	NA	NA	NA	NA	NA	NA	NA	0.592903	0	0	1.62596	0.296452	0.812981	1.45542	0.0261575	0	0	0.07208	0.0130788	0.03604	1.46237
CG9184	TRUE	FALSE	NA	NA	NA	NA	NA	NA	NA	NA	NA	NA	TRUE	FALSE	NA	NA	NA	NA	NA	NA	NA	NA	NA	NA	NA	0.90479	2.16537	1.33818	3.94722	1.12148	3.0563	1.44638	0.0740297	0.178238	0.109555	0.32452	0.0917923	0.251379	1.45342
CG34214	TRUE	FALSE	NA	NA	NA	NA	NA	NA	NA	NA	NA	NA	TRUE	FALSE	NA	NA	NA	NA	NA	NA	NA	NA	NA	NA	NA	0	4.06082	2.50954	2.7759	1.25477	3.41836	1.44588	0	0.714014	0.438872	0.487505	0.219436	0.60076	1.45299
Cad96Cb	TRUE	FALSE	NA	NA	NA	NA	NA	NA	NA	NA	NA	NA	TRUE	FALSE	NA	NA	NA	NA	NA	NA	NA	NA	NA	NA	NA	2.55606	5.09773	0	1.85851	1.27803	3.47812	1.44439	0.0538499	0.108044	0	0.0393433	0.0269249	0.0736938	1.4526
CR43629	FALSE	FALSE	NA	NA	NA	NA	NA	NA	NA	NA	NA	NA	FALSE	FALSE	NA	NA	NA	NA	NA	NA	NA	NA	NA	NA	NA	0	6.2367	2.56947	0.757509	1.28474	3.4971	1.44469	0	0.480112	0.196735	0.0582448	0.0983677	0.269178	1.45231
CG45002	TRUE	FALSE	NA	NA	NA	NA	NA	NA	NA	NA	NA	NA	TRUE	FALSE	NA	NA	NA	NA	NA	NA	NA	NA	NA	NA	NA	2.44233	12.2371	3.78125	4.64718	3.11179	8.44214	1.43986	0.0209522	0.105612	0.032458	0.0400596	0.0267051	0.0728358	1.44753
CG17197	TRUE	FALSE	NA	NA	NA	NA	NA	NA	NA	NA	NA	NA	TRUE	FALSE	NA	NA	NA	NA	NA	NA	NA	NA	NA	NA	NA	1.2726	2.03041	0	1.38795	0.636298	1.70918	1.42553	0.0427383	0.0685995	0	0.0468374	0.0213692	0.0577185	1.4335
CG4133	TRUE	FALSE	NA	NA	NA	NA	NA	NA	NA	NA	NA	NA	TRUE	FALSE	NA	NA	NA	NA	NA	NA	NA	NA	NA	NA	NA	2.62625	4.19015	0	2.86431	1.31312	3.52723	1.42553	0.0638443	0.102477	0	0.0699677	0.0319221	0.0862223	1.4335
CG16824	TRUE	FALSE	NA	NA	NA	NA	NA	NA	NA	NA	NA	NA	TRUE	FALSE	NA	NA	NA	NA	NA	NA	NA	NA	NA	NA	NA	1.69679	5.07602	1.25477	2.7759	1.47578	3.92596	1.41157	0.481907	1.45033	0.356582	0.792191	0.419244	1.12126	1.41926
CG17599	TRUE	FALSE	NA	NA	NA	NA	NA	NA	NA	NA	NA	NA	TRUE	FALSE	NA	NA	NA	NA	NA	NA	NA	NA	NA	NA	NA	2.54519	3.04561	0	3.7012	1.2726	3.37341	1.40643	0.0965662	0.116249	0	0.141104	0.0482831	0.128677	1.41416
Cpr64Ad	TRUE	FALSE	NA	NA	NA	NA	NA	NA	NA	NA	NA	NA	TRUE	FALSE	NA	NA	NA	NA	NA	NA	NA	NA	NA	NA	NA	0.848397	0	1.25477	5.55181	1.05158	2.7759	1.40039	0.0657717	0	0.0973341	0.43248	0.0815529	0.21624	1.40682
CG1246	TRUE	FALSE	NA	NA	NA	NA	NA	NA	NA	NA	NA	NA	TRUE	FALSE	NA	NA	NA	NA	NA	NA	NA	NA	NA	NA	NA	1.51222	4.4721	5.52742	14.0191	3.51982	9.24558	1.39326	0.0610821	0.181727	0.223399	0.568994	0.14224	0.375361	1.39995
CG15136	TRUE	FALSE	NA	NA	NA	NA	NA	NA	NA	NA	NA	NA	TRUE	FALSE	NA	NA	NA	NA	NA	NA	NA	NA	NA	NA	NA	0.757236	1.15415	0	0.825876	0.378618	0.990013	1.3867	0.0718024	0.110098	0	0.0786891	0.0359012	0.0943936	1.39466
CR45108	FALSE	FALSE	NA	NA	NA	NA	NA	NA	NA	NA	NA	NA	FALSE	FALSE	NA	NA	NA	NA	NA	NA	NA	NA	NA	NA	NA	2.55562	2.03873	0	4.64546	1.27781	3.3421	1.38708	0.0770253	0.0618168	0	0.140688	0.0385126	0.101252	1.39455
CCKLR-17D3	TRUE	FALSE	NA	NA	NA	NA	NA	NA	NA	NA	NA	NA	TRUE	FALSE	NA	NA	NA	NA	NA	NA	NA	NA	NA	NA	NA	0	1.0152	2.50954	5.55181	1.25477	3.2835	1.38781	0	0.0297062	0.0730361	0.162259	0.0365181	0.0959826	1.39416
CG9988	TRUE	FALSE	NA	NA	NA	NA	NA	NA	NA	NA	NA	NA	TRUE	FALSE	NA	NA	NA	NA	NA	NA	NA	NA	NA	NA	NA	1.69679	3.04561	1.25477	4.6265	1.47578	3.83606	1.37815	0.0483063	0.0872288	0.0357437	0.132349	0.042025	0.109789	1.38541
CG43968	TRUE	FALSE	NA	NA	NA	NA	NA	NA	NA	NA	NA	NA	TRUE	FALSE	NA	NA	NA	NA	NA	NA	NA	NA	NA	NA	NA	1.69679	3.04561	1.25477	4.6265	1.47578	3.83606	1.37815	0.0345164	0.0623277	0.02554	0.0945672	0.0300282	0.0784474	1.38541
dy	TRUE	FALSE	NA	NA	NA	NA	NA	NA	NA	NA	NA	NA	TRUE	FALSE	NA	NA	NA	NA	NA	NA	NA	NA	NA	NA	NA	0	4.62862	2.50954	1.8506	1.25477	3.23961	1.3684	0	0.0709692	0.0382704	0.0283409	0.0191352	0.049655	1.37571
Cib2	TRUE	FALSE	NA	NA	NA	NA	NA	NA	NA	NA	NA	NA	TRUE	FALSE	NA	NA	NA	NA	NA	NA	NA	NA	NA	NA	NA	1.69679	7.10643	2.50954	3.7012	2.10317	5.40382	1.36142	0.134006	0.564619	0.198312	0.293716	0.166159	0.429168	1.36898
CR45180	FALSE	FALSE	NA	NA	NA	NA	NA	NA	NA	NA	NA	NA	FALSE	FALSE	NA	NA	NA	NA	NA	NA	NA	NA	NA	NA	NA	1.69679	2.03041	1.25477	5.55181	1.47578	3.79111	1.36114	0.13347	0.160675	0.0987598	0.438815	0.116115	0.299745	1.36818
CG42564	TRUE	FALSE	NA	NA	NA	NA	NA	NA	NA	NA	NA	NA	TRUE	FALSE	NA	NA	NA	NA	NA	NA	NA	NA	NA	NA	NA	0.848397	8.12164	3.76431	3.7012	2.30635	5.91142	1.35789	0.036108	0.347743	0.160306	0.158285	0.0982071	0.253014	1.36532
CG16813	TRUE	FALSE	NA	NA	NA	NA	NA	NA	NA	NA	NA	NA	TRUE	FALSE	NA	NA	NA	NA	NA	NA	NA	NA	NA	NA	NA	1.00213	1.76036	0	0.802233	0.501065	1.2813	1.35453	0.0971284	0.171646	0	0.0781294	0.0485642	0.124888	1.36267
CG31702	TRUE	FALSE	NA	NA	NA	NA	NA	NA	NA	NA	NA	NA	TRUE	FALSE	NA	NA	NA	NA	NA	NA	NA	NA	NA	NA	NA	0	1.0152	1.25477	2.18065	0.627385	1.59793	1.34878	0	0.0399294	0.0490855	0.0856657	0.0245428	0.0627975	1.35541
nAChRbeta2	TRUE	FALSE	NA	NA	NA	NA	NA	NA	NA	NA	NA	NA	TRUE	FALSE	NA	NA	NA	NA	NA	NA	NA	NA	NA	NA	NA	1.38109	11.5684	6.12785	7.5314	3.75447	9.54992	1.34688	0.029603	0.249458	0.131426	0.162211	0.0805146	0.205835	1.35416
GluRIIC	TRUE	FALSE	NA	NA	NA	NA	NA	NA	NA	NA	NA	NA	TRUE	FALSE	NA	NA	NA	NA	NA	NA	NA	NA	NA	NA	NA	1.69679	1.0152	1.25477	6.47711	1.47578	3.74616	1.34393	0.0357346	0.0215092	0.0264414	0.137067	0.031088	0.079288	1.35074
CG32204	TRUE	FALSE	NA	NA	NA	NA	NA	NA	NA	NA	NA	NA	TRUE	FALSE	NA	NA	NA	NA	NA	NA	NA	NA	NA	NA	NA	2.54519	4.06082	1.25477	5.55181	1.89998	4.80631	1.33895	0.0538901	0.0864992	0.0265836	0.118117	0.0402368	0.102308	1.34634
CG17321	TRUE	FALSE	NA	NA	NA	NA	NA	NA	NA	NA	NA	NA	TRUE	FALSE	NA	NA	NA	NA	NA	NA	NA	NA	NA	NA	NA	0	1.16727	1.44272	2.45596	0.721359	1.81161	1.32849	0	0.0323329	0.0397472	0.067948	0.0198736	0.0501405	1.33512
CG5621	TRUE	FALSE	NA	NA	NA	NA	NA	NA	NA	NA	NA	NA	TRUE	FALSE	NA	NA	NA	NA	NA	NA	NA	NA	NA	NA	NA	4.2455	8.13031	1.25611	5.55645	2.75081	6.84338	1.31486	0.0891879	0.171828	0.0264038	0.117291	0.0577958	0.14456	1.32263
CG34215	TRUE	FALSE	NA	NA	NA	NA	NA	NA	NA	NA	NA	NA	TRUE	FALSE	NA	NA	NA	NA	NA	NA	NA	NA	NA	NA	NA	1.69679	3.04561	2.50954	7.40241	2.10317	5.22401	1.31259	0.409134	0.738791	0.605468	1.7935	0.507301	1.26614	1.31953
CCHa2	TRUE	FALSE	NA	NA	NA	NA	NA	NA	NA	NA	NA	NA	TRUE	FALSE	NA	NA	NA	NA	NA	NA	NA	NA	NA	NA	NA	0	2.26953	2.80509	4.6265	1.40254	3.44802	1.29772	0	0.124656	0.153241	0.253812	0.0766203	0.189234	1.30437
CG15270	TRUE	FALSE	NA	NA	NA	NA	NA	NA	NA	NA	NA	NA	TRUE	FALSE	NA	NA	NA	NA	NA	NA	NA	NA	NA	NA	NA	4.50511	6.80003	2.66521	10.8097	3.58516	8.80486	1.29626	0.0493477	0.0749347	0.0292115	0.118978	0.0392796	0.0969563	1.30356
Sdic1	TRUE	FALSE	NA	NA	NA	NA	NA	NA	NA	NA	NA	NA	TRUE	FALSE	NA	NA	NA	NA	NA	NA	NA	NA	NA	NA	NA	3.75166	9.74517	2.92005	6.47154	3.33586	8.10835	1.28135	0.129227	0.337698	0.100642	0.22399	0.114935	0.280844	1.28896
CG13258	TRUE	FALSE	NA	NA	NA	NA	NA	NA	NA	NA	NA	NA	TRUE	FALSE	NA	NA	NA	NA	NA	NA	NA	NA	NA	NA	NA	0	3.11047	1.28149	0	0.640745	1.55524	1.27931	0	0.30835	0.126352	0	0.0631761	0.154175	1.28712
Cyp4ad1	TRUE	FALSE	NA	NA	NA	NA	NA	NA	NA	NA	NA	NA	TRUE	FALSE	NA	NA	NA	NA	NA	NA	NA	NA	NA	NA	NA	0	3.74333	1.54222	0	0.771111	1.87166	1.27931	0	0.17607	0.0721483	0	0.0360741	0.0880352	1.28712
CG15576	TRUE	FALSE	NA	NA	NA	NA	NA	NA	NA	NA	NA	NA	TRUE	FALSE	NA	NA	NA	NA	NA	NA	NA	NA	NA	NA	NA	0	3.04561	1.25477	0	0.627385	1.52281	1.27931	0	0.250694	0.102727	0	0.0513633	0.125347	1.28712
eater	TRUE	FALSE	NA	NA	NA	NA	NA	NA	NA	NA	NA	NA	TRUE	FALSE	NA	NA	NA	NA	NA	NA	NA	NA	NA	NA	NA	0.848397	5.07602	1.25477	0	1.05158	2.53801	1.27114	0.0161566	0.0972489	0.0239098	0	0.0200332	0.0486244	1.27929
CG11634	TRUE	FALSE	NA	NA	NA	NA	NA	NA	NA	NA	NA	NA	TRUE	FALSE	NA	NA	NA	NA	NA	NA	NA	NA	NA	NA	NA	1.19373	1.57483	0	1.30194	0.596865	1.43838	1.26897	0.0526449	0.0698706	0	0.0576942	0.0263225	0.0637824	1.27686
CG34357	TRUE	FALSE	NA	NA	NA	NA	NA	NA	NA	NA	NA	NA	TRUE	FALSE	NA	NA	NA	NA	NA	NA	NA	NA	NA	NA	NA	10.7582	9.27901	3.86648	25.8418	7.31236	17.5604	1.26392	0.0987762	0.0857083	0.0355212	0.23841	0.0671487	0.162059	1.27109
Gr97a	TRUE	FALSE	NA	NA	NA	NA	NA	NA	NA	NA	NA	NA	TRUE	FALSE	NA	NA	NA	NA	NA	NA	NA	NA	NA	NA	NA	0.85069	2.0359	0	0	0.425345	1.01795	1.25896	0.0453141	0.109101	0	0	0.0226571	0.0545506	1.26764
beat-Ia	TRUE	FALSE	NA	NA	NA	NA	NA	NA	NA	NA	NA	NA	TRUE	FALSE	NA	NA	NA	NA	NA	NA	NA	NA	NA	NA	NA	0.853216	2.04194	0	0	0.426608	1.02097	1.25896	0.0189768	0.0456897	0	0	0.0094884	0.0228448	1.26763
CG11043	TRUE	FALSE	NA	NA	NA	NA	NA	NA	NA	NA	NA	NA	TRUE	FALSE	NA	NA	NA	NA	NA	NA	NA	NA	NA	NA	NA	0.848397	2.03041	0	0	0.424199	1.0152	1.25896	0.111871	0.269348	0	0	0.0559357	0.134674	1.26763
CG33669	TRUE	FALSE	NA	NA	NA	NA	NA	NA	NA	NA	NA	NA	TRUE	FALSE	NA	NA	NA	NA	NA	NA	NA	NA	NA	NA	NA	0.848397	2.03041	0	0	0.424199	1.0152	1.25896	0.129171	0.311	0	0	0.0645856	0.1555	1.26763
CR45165	FALSE	FALSE	NA	NA	NA	NA	NA	NA	NA	NA	NA	NA	FALSE	FALSE	NA	NA	NA	NA	NA	NA	NA	NA	NA	NA	NA	0.692316	1.65687	0	0	0.346158	0.828436	1.25896	0.500294	1.20454	0	0	0.250147	0.602269	1.26763
CG14507	TRUE	FALSE	NA	NA	NA	NA	NA	NA	NA	NA	NA	NA	TRUE	FALSE	NA	NA	NA	NA	NA	NA	NA	NA	NA	NA	NA	0.848397	2.03041	0	0	0.424199	1.0152	1.25896	0.04847	0.116699	0	0	0.024235	0.0583496	1.26763
CG15056	TRUE	FALSE	NA	NA	NA	NA	NA	NA	NA	NA	NA	NA	TRUE	FALSE	NA	NA	NA	NA	NA	NA	NA	NA	NA	NA	NA	0.848397	2.03041	0	0	0.424199	1.0152	1.25896	0.0409126	0.0985035	0	0	0.0204563	0.0492517	1.26763
CG31913	TRUE	FALSE	NA	NA	NA	NA	NA	NA	NA	NA	NA	NA	TRUE	FALSE	NA	NA	NA	NA	NA	NA	NA	NA	NA	NA	NA	0.848397	2.03041	0	0	0.424199	1.0152	1.25896	0.0754791	0.181728	0	0	0.0377395	0.0908639	1.26763
CG7568	TRUE	FALSE	NA	NA	NA	NA	NA	NA	NA	NA	NA	NA	TRUE	FALSE	NA	NA	NA	NA	NA	NA	NA	NA	NA	NA	NA	0.703215	1.68296	0	0	0.351608	0.841478	1.25896	0.0273569	0.065866	0	0	0.0136784	0.032933	1.26763
CG9222	TRUE	FALSE	NA	NA	NA	NA	NA	NA	NA	NA	NA	NA	TRUE	FALSE	NA	NA	NA	NA	NA	NA	NA	NA	NA	NA	NA	0.848397	2.03041	0	0	0.424199	1.0152	1.25896	0.0459376	0.110602	0	0	0.0229688	0.055301	1.26763
CR43424	FALSE	FALSE	NA	NA	NA	NA	NA	NA	NA	NA	NA	NA	FALSE	FALSE	NA	NA	NA	NA	NA	NA	NA	NA	NA	NA	NA	0.848397	2.03041	0	0	0.424199	1.0152	1.25896	0.0377963	0.0910005	0	0	0.0188981	0.0455003	1.26763
CR44429	FALSE	FALSE	NA	NA	NA	NA	NA	NA	NA	NA	NA	NA	FALSE	FALSE	NA	NA	NA	NA	NA	NA	NA	NA	NA	NA	NA	0.848397	2.03041	0	0	0.424199	1.0152	1.25896	0.0831147	0.200112	0	0	0.0415574	0.100056	1.26763
CR44986	FALSE	FALSE	NA	NA	NA	NA	NA	NA	NA	NA	NA	NA	FALSE	FALSE	NA	NA	NA	NA	NA	NA	NA	NA	NA	NA	NA	0.848397	2.03041	0	0	0.424199	1.0152	1.25896	0.100639	0.242305	0	0	0.0503196	0.121152	1.26763
Mst57Da	TRUE	FALSE	NA	NA	NA	NA	NA	NA	NA	NA	NA	NA	TRUE	FALSE	NA	NA	NA	NA	NA	NA	NA	NA	NA	NA	NA	0.848397	2.03041	0	0	0.424199	1.0152	1.25896	0.395083	0.951225	0	0	0.197542	0.475613	1.26763
phyl	TRUE	FALSE	NA	NA	NA	NA	NA	NA	NA	NA	NA	NA	TRUE	FALSE	NA	NA	NA	NA	NA	NA	NA	NA	NA	NA	NA	0.848397	2.03041	0	0	0.424199	1.0152	1.25896	0.0305597	0.0735772	0	0	0.0152798	0.0367886	1.26763
VhaPPA1-2	TRUE	FALSE	NA	NA	NA	NA	NA	NA	NA	NA	NA	NA	TRUE	FALSE	NA	NA	NA	NA	NA	NA	NA	NA	NA	NA	NA	0.848397	2.03041	0	0	0.424199	1.0152	1.25896	0.105958	0.255112	0	0	0.0529792	0.127556	1.26763
CG15333	TRUE	FALSE	NA	NA	NA	NA	NA	NA	NA	NA	NA	NA	TRUE	FALSE	NA	NA	NA	NA	NA	NA	NA	NA	NA	NA	NA	0.848397	2.03041	0	0	0.424199	1.0152	1.25896	0.0308607	0.0743021	0	0	0.0154304	0.0371511	1.26763
Ir94f	TRUE	FALSE	NA	NA	NA	NA	NA	NA	NA	NA	NA	NA	TRUE	FALSE	NA	NA	NA	NA	NA	NA	NA	NA	NA	NA	NA	0.848397	2.03041	0	0	0.424199	1.0152	1.25896	0.0339092	0.0816419	0	0	0.0169546	0.0408209	1.26763
CG11842	TRUE	FALSE	NA	NA	NA	NA	NA	NA	NA	NA	NA	NA	TRUE	FALSE	NA	NA	NA	NA	NA	NA	NA	NA	NA	NA	NA	1.69679	6.09123	1.25477	0.925301	1.47578	3.50826	1.24928	0.109071	0.393907	0.0807056	0.0597659	0.0948882	0.226837	1.25735
CR44962	FALSE	FALSE	NA	NA	NA	NA	NA	NA	NA	NA	NA	NA	FALSE	FALSE	NA	NA	NA	NA	NA	NA	NA	NA	NA	NA	NA	1.54294	1.8463	1.39375	5.13894	1.46834	3.49262	1.25012	0.17312	0.208407	0.156475	0.57938	0.164797	0.393893	1.25711
CG13970	TRUE	FALSE	NA	NA	NA	NA	NA	NA	NA	NA	NA	NA	TRUE	FALSE	NA	NA	NA	NA	NA	NA	NA	NA	NA	NA	NA	0	2.03041	1.25477	0.925301	0.627385	1.47786	1.23608	0	0.213193	0.13104	0.0970408	0.0655202	0.155117	1.24335
CG15239	TRUE	FALSE	NA	NA	NA	NA	NA	NA	NA	NA	NA	NA	TRUE	FALSE	NA	NA	NA	NA	NA	NA	NA	NA	NA	NA	NA	0	4.06082	2.50954	1.8506	1.25477	2.95571	1.23608	0	0.134223	0.0825008	0.0610953	0.0412504	0.0976592	1.24335
CG30484	TRUE	FALSE	NA	NA	NA	NA	NA	NA	NA	NA	NA	NA	TRUE	FALSE	NA	NA	NA	NA	NA	NA	NA	NA	NA	NA	NA	0	2.03041	1.25477	0.925301	0.627385	1.47786	1.23608	0	0.0392411	0.0241197	0.0178617	0.0120599	0.0285514	1.24335
CG8813	TRUE	FALSE	NA	NA	NA	NA	NA	NA	NA	NA	NA	NA	TRUE	FALSE	NA	NA	NA	NA	NA	NA	NA	NA	NA	NA	NA	0	2.03041	1.25477	0.925301	0.627385	1.47786	1.23608	0	0.151023	0.0928267	0.0687421	0.0464134	0.109882	1.24335
CG13010	TRUE	FALSE	NA	NA	NA	NA	NA	NA	NA	NA	NA	NA	TRUE	FALSE	NA	NA	NA	NA	NA	NA	NA	NA	NA	NA	NA	0	2.03041	1.25477	0.925301	0.627385	1.47786	1.23608	0	0.250348	0.153878	0.113953	0.0769388	0.18215	1.24335
CG14372	TRUE	FALSE	NA	NA	NA	NA	NA	NA	NA	NA	NA	NA	TRUE	FALSE	NA	NA	NA	NA	NA	NA	NA	NA	NA	NA	NA	0	2.07429	1.28189	0.945297	0.640943	1.50979	1.23608	0	0.0255649	0.0157136	0.0116366	0.00785679	0.0186007	1.24335
CG3491	TRUE	FALSE	NA	NA	NA	NA	NA	NA	NA	NA	NA	NA	TRUE	FALSE	NA	NA	NA	NA	NA	NA	NA	NA	NA	NA	NA	0	2.03041	1.25477	0.925301	0.627385	1.47786	1.23608	0	0.0213154	0.0131016	0.00970227	0.00655079	0.0155088	1.24335
CG6639	TRUE	FALSE	NA	NA	NA	NA	NA	NA	NA	NA	NA	NA	TRUE	FALSE	NA	NA	NA	NA	NA	NA	NA	NA	NA	NA	NA	0	2.03041	1.25477	0.925301	0.627385	1.47786	1.23608	0	0.0869357	0.0534354	0.0395711	0.0267177	0.0632534	1.24335
CG13749	TRUE	FALSE	NA	NA	NA	NA	NA	NA	NA	NA	NA	NA	TRUE	FALSE	NA	NA	NA	NA	NA	NA	NA	NA	NA	NA	NA	1.69679	5.07602	1.25477	1.8506	1.47578	3.46331	1.23067	0.143605	0.432189	0.106259	0.157378	0.124932	0.294784	1.23852
CG8563	TRUE	FALSE	NA	NA	NA	NA	NA	NA	NA	NA	NA	NA	TRUE	FALSE	NA	NA	NA	NA	NA	NA	NA	NA	NA	NA	NA	0.937942	7.85649	4.16162	4.09185	2.54978	5.97417	1.22837	0.0315802	0.26612	0.140205	0.138437	0.0858925	0.202279	1.23574
CG42489	TRUE	FALSE	NA	NA	NA	NA	NA	NA	NA	NA	NA	NA	TRUE	FALSE	NA	NA	NA	NA	NA	NA	NA	NA	NA	NA	NA	2.36903	2.03041	1.25477	6.45941	1.8119	4.24491	1.22823	0.575926	0.496581	0.305226	1.5779	0.440576	1.03724	1.23529
CG8800	TRUE	FALSE	NA	NA	NA	NA	NA	NA	NA	NA	NA	NA	TRUE	FALSE	NA	NA	NA	NA	NA	NA	NA	NA	NA	NA	NA	1.69679	3.04561	0	0.925301	0.848397	1.98546	1.22666	0.178994	0.323217	0	0.0980806	0.0894968	0.210649	1.23493
CG9822	TRUE	FALSE	NA	NA	NA	NA	NA	NA	NA	NA	NA	NA	TRUE	FALSE	NA	NA	NA	NA	NA	NA	NA	NA	NA	NA	NA	3.39359	6.09123	0	1.8506	1.69679	3.97092	1.22666	0.293088	0.529242	0	0.160599	0.146544	0.344921	1.23493
Grp	TRUE	FALSE	NA	NA	NA	NA	NA	NA	NA	NA	NA	NA	TRUE	FALSE	NA	NA	NA	NA	NA	NA	NA	NA	NA	NA	NA	1.37703	3.29554	1.63428	3.75462	1.50565	3.52508	1.22727	0.0478223	0.11514	0.0567905	0.131023	0.0523064	0.123081	1.23455
Tsp42Ek	TRUE	FALSE	NA	NA	NA	NA	NA	NA	NA	NA	NA	NA	TRUE	FALSE	NA	NA	NA	NA	NA	NA	NA	NA	NA	NA	NA	0.741079	3.54715	1.46725	1.61651	1.10416	2.58183	1.22544	0.0499183	0.240372	0.0988915	0.109412	0.0744049	0.174892	1.233
fw	TRUE	FALSE	NA	NA	NA	NA	NA	NA	NA	NA	NA	NA	TRUE	FALSE	NA	NA	NA	NA	NA	NA	NA	NA	NA	NA	NA	2.80386	10.1521	5.52918	9.31862	4.16652	9.73534	1.22439	0.0402121	0.146475	0.0793454	0.13429	0.0597788	0.140383	1.23166
CG34454	TRUE	FALSE	NA	NA	NA	NA	NA	NA	NA	NA	NA	NA	TRUE	FALSE	NA	NA	NA	NA	NA	NA	NA	NA	NA	NA	NA	0.848397	3.04561	1.25477	1.8506	1.05158	2.44811	1.2191	0.124056	0.448025	0.183587	0.271908	0.153821	0.359966	1.22661
CG43318	TRUE	FALSE	NA	NA	NA	NA	NA	NA	NA	NA	NA	NA	TRUE	FALSE	NA	NA	NA	NA	NA	NA	NA	NA	NA	NA	NA	0.848397	3.04561	1.25477	1.8506	1.05158	2.44811	1.2191	0.119614	0.431986	0.177015	0.262173	0.148314	0.34708	1.22661
CR45531	FALSE	FALSE	NA	NA	NA	NA	NA	NA	NA	NA	NA	NA	FALSE	FALSE	NA	NA	NA	NA	NA	NA	NA	NA	NA	NA	NA	0.848397	3.04561	1.25477	1.8506	1.05158	2.44811	1.2191	0.0185759	0.0670866	0.02749	0.0407151	0.023033	0.0539008	1.22661
Cyp9b1	TRUE	FALSE	NA	NA	NA	NA	NA	NA	NA	NA	NA	NA	TRUE	FALSE	NA	NA	NA	NA	NA	NA	NA	NA	NA	NA	NA	0	2.03041	1.26978	0.925301	0.634892	1.47786	1.21892	0	0.0776991	0.0483295	0.0353668	0.0241648	0.056533	1.22619
CG3597	TRUE	FALSE	NA	NA	NA	NA	NA	NA	NA	NA	NA	NA	TRUE	FALSE	NA	NA	NA	NA	NA	NA	NA	NA	NA	NA	NA	0.850883	6.10905	3.77533	4.64004	2.3131	5.37454	1.21631	0.0489433	0.353515	0.21729	0.268186	0.133116	0.310851	1.22353
KP78a	TRUE	FALSE	NA	NA	NA	NA	NA	NA	NA	NA	NA	NA	TRUE	FALSE	NA	NA	NA	NA	NA	NA	NA	NA	NA	NA	NA	2.08571	5.82352	2.0565	3.79129	2.07111	4.80741	1.21486	0.0257277	0.0722675	0.0253826	0.0469922	0.0255552	0.0596299	1.22242
CG40155	TRUE	FALSE	NA	NA	NA	NA	NA	NA	NA	NA	NA	NA	TRUE	FALSE	NA	NA	NA	NA	NA	NA	NA	NA	NA	NA	NA	0	3.04561	2.50954	2.7759	1.25477	2.91076	1.21397	0	0.408582	0.334849	0.371954	0.167424	0.390268	1.22096
cn	TRUE	FALSE	NA	NA	NA	NA	NA	NA	NA	NA	NA	NA	TRUE	FALSE	NA	NA	NA	NA	NA	NA	NA	NA	NA	NA	NA	3.39359	5.07602	0	2.7759	1.69679	3.92596	1.21024	0.126003	0.189608	0	0.103566	0.0630017	0.146587	1.2183
CG42750	TRUE	FALSE	NA	NA	NA	NA	NA	NA	NA	NA	NA	NA	TRUE	FALSE	NA	NA	NA	NA	NA	NA	NA	NA	NA	NA	NA	3.17953	8.70789	2.35125	3.96837	2.76539	6.33813	1.19657	0.0298586	0.0822678	0.0220935	0.0374464	0.0259761	0.0598571	1.20434
CG12783	TRUE	FALSE	NA	NA	NA	NA	NA	NA	NA	NA	NA	NA	TRUE	FALSE	NA	NA	NA	NA	NA	NA	NA	NA	NA	NA	NA	0.852143	1.01969	0	0.929387	0.426072	0.974537	1.19362	0.0340474	0.0409873	0	0.037313	0.0170237	0.0391501	1.20147
Gr66a	TRUE	FALSE	NA	NA	NA	NA	NA	NA	NA	NA	NA	NA	TRUE	FALSE	NA	NA	NA	NA	NA	NA	NA	NA	NA	NA	NA	1.69679	2.03041	0	1.8506	0.848397	1.94051	1.19362	0.0723724	0.087124	0	0.0793137	0.0361862	0.0832188	1.20147
2mit	TRUE	FALSE	NA	NA	NA	NA	NA	NA	NA	NA	NA	NA	TRUE	FALSE	NA	NA	NA	NA	NA	NA	NA	NA	NA	NA	NA	1.61128	1.92809	0	1.75734	0.805642	1.84271	1.19362	0.0136896	0.01648	0	0.0150026	0.00684481	0.0157413	1.20147
alpha-catenin-related	TRUE	FALSE	NA	NA	NA	NA	NA	NA	NA	NA	NA	NA	TRUE	FALSE	NA	NA	NA	NA	NA	NA	NA	NA	NA	NA	NA	0.848397	1.0152	0	0.925301	0.424199	0.970253	1.19362	0.0178482	0.0214862	0	0.01956	0.0089241	0.0205231	1.20147
CG1688	TRUE	FALSE	NA	NA	NA	NA	NA	NA	NA	NA	NA	NA	TRUE	FALSE	NA	NA	NA	NA	NA	NA	NA	NA	NA	NA	NA	0.848397	1.0152	0	0.925301	0.424199	0.970253	1.19362	0.0127949	0.0154029	0	0.0140221	0.00639746	0.0147125	1.20147
CG30043	TRUE	FALSE	NA	NA	NA	NA	NA	NA	NA	NA	NA	NA	TRUE	FALSE	NA	NA	NA	NA	NA	NA	NA	NA	NA	NA	NA	0.848397	1.0152	0	0.925301	0.424199	0.970253	1.19362	0.0173839	0.0209272	0	0.0190512	0.00869194	0.0199892	1.20147
CG33966	TRUE	FALSE	NA	NA	NA	NA	NA	NA	NA	NA	NA	NA	TRUE	FALSE	NA	NA	NA	NA	NA	NA	NA	NA	NA	NA	NA	0.848397	1.0152	0	0.925301	0.424199	0.970253	1.19362	0.0519896	0.0625866	0	0.056976	0.0259948	0.0597813	1.20147
CG8105	TRUE	FALSE	NA	NA	NA	NA	NA	NA	NA	NA	NA	NA	TRUE	FALSE	NA	NA	NA	NA	NA	NA	NA	NA	NA	NA	NA	0.848397	1.0152	0	0.925301	0.424199	0.970253	1.19362	0.0365824	0.0440389	0	0.0400911	0.0182912	0.042065	1.20147
CR43631	FALSE	FALSE	NA	NA	NA	NA	NA	NA	NA	NA	NA	NA	FALSE	FALSE	NA	NA	NA	NA	NA	NA	NA	NA	NA	NA	NA	1.69679	2.03041	0	1.8506	0.848397	1.94051	1.19362	0.184258	0.221815	0	0.201931	0.0921291	0.211873	1.20147
CR44222	FALSE	FALSE	NA	NA	NA	NA	NA	NA	NA	NA	NA	NA	FALSE	FALSE	NA	NA	NA	NA	NA	NA	NA	NA	NA	NA	NA	0.848397	1.0152	0	0.925301	0.424199	0.970253	1.19362	0.0505731	0.0608814	0	0.0554237	0.0252866	0.0581525	1.20147
Gyc-89Db	TRUE	FALSE	NA	NA	NA	NA	NA	NA	NA	NA	NA	NA	TRUE	FALSE	NA	NA	NA	NA	NA	NA	NA	NA	NA	NA	NA	0.848397	1.0152	0	0.925301	0.424199	0.970253	1.19362	0.0193879	0.0233397	0	0.0212474	0.00969396	0.0222936	1.20147
CG13202	TRUE	FALSE	NA	NA	NA	NA	NA	NA	NA	NA	NA	NA	TRUE	FALSE	NA	NA	NA	NA	NA	NA	NA	NA	NA	NA	NA	0.848397	1.0152	0	0.925301	0.424199	0.970253	1.19362	0.220788	0.265791	0	0.241964	0.110394	0.253878	1.20147
CG30265	TRUE	FALSE	NA	NA	NA	NA	NA	NA	NA	NA	NA	NA	TRUE	FALSE	NA	NA	NA	NA	NA	NA	NA	NA	NA	NA	NA	0.892814	1.06836	0	0.973744	0.446407	1.02105	1.19362	0.0352199	0.0423987	0	0.0385978	0.0176099	0.0404983	1.20147
CG31867	TRUE	FALSE	NA	NA	NA	NA	NA	NA	NA	NA	NA	NA	TRUE	FALSE	NA	NA	NA	NA	NA	NA	NA	NA	NA	NA	NA	0.965011	1.15475	0	1.05249	0.482506	1.10362	1.19362	0.0998372	0.120187	0	0.109413	0.0499186	0.1148	1.20147
CG34345	TRUE	FALSE	NA	NA	NA	NA	NA	NA	NA	NA	NA	NA	TRUE	FALSE	NA	NA	NA	NA	NA	NA	NA	NA	NA	NA	NA	1.69679	2.03041	0	1.8506	0.848397	1.94051	1.19362	0.0635207	0.0764681	0	0.0696131	0.0317604	0.0730406	1.20147
CG42749	TRUE	FALSE	NA	NA	NA	NA	NA	NA	NA	NA	NA	NA	TRUE	FALSE	NA	NA	NA	NA	NA	NA	NA	NA	NA	NA	NA	0.848397	1.0152	0	0.925301	0.424199	0.970253	1.19362	0.0413173	0.049739	0	0.0452801	0.0206587	0.0475095	1.20147
CG9458	TRUE	FALSE	NA	NA	NA	NA	NA	NA	NA	NA	NA	NA	TRUE	FALSE	NA	NA	NA	NA	NA	NA	NA	NA	NA	NA	NA	0.848397	1.0152	0	0.925301	0.424199	0.970253	1.19362	0.0714951	0.0860679	0	0.0783523	0.0357476	0.0822101	1.20147
CG9459	TRUE	FALSE	NA	NA	NA	NA	NA	NA	NA	NA	NA	NA	TRUE	FALSE	NA	NA	NA	NA	NA	NA	NA	NA	NA	NA	NA	0.848397	1.0152	0	0.925301	0.424199	0.970253	1.19362	0.0713933	0.0859453	0	0.0782407	0.0356966	0.082093	1.20147
CR44621	FALSE	FALSE	NA	NA	NA	NA	NA	NA	NA	NA	NA	NA	FALSE	FALSE	NA	NA	NA	NA	NA	NA	NA	NA	NA	NA	NA	0.848397	1.0152	0	0.925301	0.424199	0.970253	1.19362	0.150506	0.181184	0	0.164942	0.0752532	0.173063	1.20147
CR45376	FALSE	FALSE	NA	NA	NA	NA	NA	NA	NA	NA	NA	NA	FALSE	FALSE	NA	NA	NA	NA	NA	NA	NA	NA	NA	NA	NA	0.848397	1.0152	0	0.925301	0.424199	0.970253	1.19362	0.0408126	0.0491314	0	0.044727	0.0204063	0.0469292	1.20147
Dpt	TRUE	FALSE	NA	NA	NA	NA	NA	NA	NA	NA	NA	NA	TRUE	FALSE	NA	NA	NA	NA	NA	NA	NA	NA	NA	NA	NA	1.69679	2.03041	0	1.8506	0.848397	1.94051	1.19362	0.3375	0.406292	0	0.36987	0.16875	0.388081	1.20147
E(spl)mgamma-HLH	TRUE	FALSE	NA	NA	NA	NA	NA	NA	NA	NA	NA	NA	TRUE	FALSE	NA	NA	NA	NA	NA	NA	NA	NA	NA	NA	NA	0.848397	1.0152	0	0.925301	0.424199	0.970253	1.19362	0.0703906	0.0847382	0	0.0771418	0.0351953	0.08094	1.20147
Tsp42Eo	TRUE	FALSE	NA	NA	NA	NA	NA	NA	NA	NA	NA	NA	TRUE	FALSE	NA	NA	NA	NA	NA	NA	NA	NA	NA	NA	NA	0.848397	1.0152	0	0.925301	0.424199	0.970253	1.19362	0.0726349	0.08744	0	0.0796014	0.0363175	0.0835207	1.20147
CG42562	TRUE	FALSE	NA	NA	NA	NA	NA	NA	NA	NA	NA	NA	TRUE	FALSE	NA	NA	NA	NA	NA	NA	NA	NA	NA	NA	NA	3.39359	4.06082	0	3.7012	1.69679	3.88101	1.19362	0.708393	0.852784	0	0.776335	0.354196	0.814559	1.20147
CG43210	TRUE	FALSE	NA	NA	NA	NA	NA	NA	NA	NA	NA	NA	TRUE	FALSE	NA	NA	NA	NA	NA	NA	NA	NA	NA	NA	NA	1.22311	1.46359	0	1.33398	0.611556	1.39879	1.19362	0.139218	0.167595	0	0.152571	0.0696091	0.160083	1.20147
CR45140	FALSE	FALSE	NA	NA	NA	NA	NA	NA	NA	NA	NA	NA	FALSE	FALSE	NA	NA	NA	NA	NA	NA	NA	NA	NA	NA	NA	3.39359	9.19727	3.24789	5.98771	3.32074	7.59249	1.19307	0.256031	0.698076	0.245186	0.453926	0.250608	0.576001	1.20064
dpr13	TRUE	FALSE	NA	NA	NA	NA	NA	NA	NA	NA	NA	NA	TRUE	FALSE	NA	NA	NA	NA	NA	NA	NA	NA	NA	NA	NA	2.61667	4.17486	1.29001	4.75643	1.95334	4.46564	1.19293	0.0514908	0.0826482	0.0254	0.094049	0.0384454	0.0883486	1.20039
Gypsy2_LTR|Drosophila_fruit_fly_genus	FALSE	TRUE	NA	NA	NA	NA	NA	NA	NA	NA	NA	NA	FALSE	TRUE	NA	NA	NA	NA	NA	NA	NA	NA	NA	NA	NA	1.69679	3.04561	1.25477	3.7012	1.47578	3.37341	1.19273	0.650148	1.174	0.48107	1.42501	0.565609	1.29951	1.20009
CG6106	TRUE	FALSE	NA	NA	NA	NA	NA	NA	NA	NA	NA	NA	TRUE	FALSE	NA	NA	NA	NA	NA	NA	NA	NA	NA	NA	NA	2.97585	5.93463	2.93403	7.5727	2.95494	6.75367	1.19254	0.0895538	0.17967	0.0883481	0.228989	0.0889509	0.20433	1.19982
CG10396	TRUE	FALSE	NA	NA	NA	NA	NA	NA	NA	NA	NA	NA	TRUE	FALSE	NA	NA	NA	NA	NA	NA	NA	NA	NA	NA	NA	0.852929	2.04126	1.26147	2.79073	1.0572	2.41599	1.19237	0.10709	0.257837	0.158481	0.352085	0.132786	0.304961	1.19953
CR44339	FALSE	FALSE	NA	NA	NA	NA	NA	NA	NA	NA	NA	NA	FALSE	FALSE	NA	NA	NA	NA	NA	NA	NA	NA	NA	NA	NA	0.848397	2.03041	1.25477	2.7759	1.05158	2.40316	1.19237	0.116554	0.280623	0.172486	0.3832	0.14452	0.331911	1.19953
lectin-33A	TRUE	FALSE	NA	NA	NA	NA	NA	NA	NA	NA	NA	NA	TRUE	FALSE	NA	NA	NA	NA	NA	NA	NA	NA	NA	NA	NA	1.69679	4.06082	2.50954	5.55181	2.10317	4.80631	1.19237	0.242704	0.584349	0.359173	0.797947	0.300938	0.691148	1.19953
Rgk1	TRUE	FALSE	NA	NA	NA	NA	NA	NA	NA	NA	NA	NA	TRUE	FALSE	NA	NA	NA	NA	NA	NA	NA	NA	NA	NA	NA	1.47721	3.53317	2.18346	4.83043	1.83033	4.1818	1.19202	0.0287052	0.0690707	0.0424546	0.0943183	0.0355799	0.0816945	1.19918
CG14177	TRUE	FALSE	NA	NA	NA	NA	NA	NA	NA	NA	NA	NA	TRUE	FALSE	NA	NA	NA	NA	NA	NA	NA	NA	NA	NA	NA	0	1.0152	1.25477	1.8506	0.627385	1.4329	1.19152	0	0.420915	0.517434	0.766364	0.258717	0.593639	1.19821
CG1468	TRUE	FALSE	NA	NA	NA	NA	NA	NA	NA	NA	NA	NA	TRUE	FALSE	NA	NA	NA	NA	NA	NA	NA	NA	NA	NA	NA	0	1.0152	1.25477	1.8506	0.627385	1.4329	1.19152	0	0.112563	0.138375	0.204945	0.0691874	0.158754	1.19821
CG15144	TRUE	FALSE	NA	NA	NA	NA	NA	NA	NA	NA	NA	NA	TRUE	FALSE	NA	NA	NA	NA	NA	NA	NA	NA	NA	NA	NA	0	1.0152	1.25477	1.8506	0.627385	1.4329	1.19152	0	0.0190747	0.0234487	0.0347294	0.0117243	0.0269021	1.19821
CG16756	TRUE	FALSE	NA	NA	NA	NA	NA	NA	NA	NA	NA	NA	TRUE	FALSE	NA	NA	NA	NA	NA	NA	NA	NA	NA	NA	NA	0	2.03041	2.50954	3.7012	1.25477	2.86581	1.19152	0	0.374747	0.46068	0.682305	0.23034	0.528526	1.19821
Rdh	TRUE	FALSE	NA	NA	NA	NA	NA	NA	NA	NA	NA	NA	TRUE	FALSE	NA	NA	NA	NA	NA	NA	NA	NA	NA	NA	NA	0	2.03041	2.50954	3.7012	1.25477	2.86581	1.19152	0	0.500702	0.615518	0.911633	0.307759	0.706168	1.19821
CG16884	TRUE	FALSE	NA	NA	NA	NA	NA	NA	NA	NA	NA	NA	TRUE	FALSE	NA	NA	NA	NA	NA	NA	NA	NA	NA	NA	NA	0	1.0152	1.25477	1.8506	0.627385	1.4329	1.19152	0	0.049698	0.0610942	0.0904856	0.0305471	0.0700918	1.19821
CG3124	TRUE	FALSE	NA	NA	NA	NA	NA	NA	NA	NA	NA	NA	TRUE	FALSE	NA	NA	NA	NA	NA	NA	NA	NA	NA	NA	NA	0	1.02919	1.27206	1.87609	0.636028	1.45264	1.19152	0	0.0615648	0.0756821	0.112092	0.037841	0.0868281	1.19821
CG8358	TRUE	FALSE	NA	NA	NA	NA	NA	NA	NA	NA	NA	NA	TRUE	FALSE	NA	NA	NA	NA	NA	NA	NA	NA	NA	NA	NA	0	1.0152	1.25477	1.8506	0.627385	1.4329	1.19152	0	0.0301968	0.0371212	0.0549796	0.0185606	0.0425882	1.19821
Cpr49Ah	TRUE	FALSE	NA	NA	NA	NA	NA	NA	NA	NA	NA	NA	TRUE	FALSE	NA	NA	NA	NA	NA	NA	NA	NA	NA	NA	NA	0	1.0152	1.25477	1.8506	0.627385	1.4329	1.19152	0	0.076275	0.0937656	0.138875	0.0468828	0.107575	1.19821
CR43159	FALSE	FALSE	NA	NA	NA	NA	NA	NA	NA	NA	NA	NA	FALSE	FALSE	NA	NA	NA	NA	NA	NA	NA	NA	NA	NA	NA	0	1.0152	1.25477	1.8506	0.627385	1.4329	1.19152	0	0.0616907	0.0758369	0.112321	0.0379184	0.0870057	1.19821
NimB5	TRUE	FALSE	NA	NA	NA	NA	NA	NA	NA	NA	NA	NA	TRUE	FALSE	NA	NA	NA	NA	NA	NA	NA	NA	NA	NA	NA	0	1.22428	1.51319	2.23173	0.756593	1.728	1.19152	0	0.0640483	0.0787351	0.116613	0.0393676	0.0903308	1.19821
TotX	TRUE	FALSE	NA	NA	NA	NA	NA	NA	NA	NA	NA	NA	TRUE	FALSE	NA	NA	NA	NA	NA	NA	NA	NA	NA	NA	NA	0	1.0152	1.25477	1.8506	0.627385	1.4329	1.19152	0	0.149712	0.184043	0.272582	0.0920213	0.211147	1.19821
CG12395	TRUE	FALSE	NA	NA	NA	NA	NA	NA	NA	NA	NA	NA	TRUE	FALSE	NA	NA	NA	NA	NA	NA	NA	NA	NA	NA	NA	1.69679	2.03041	1.25477	4.6265	1.47578	3.32846	1.17337	0.125609	0.151212	0.0929431	0.344141	0.109276	0.247677	1.18048
CG31380	TRUE	FALSE	NA	NA	NA	NA	NA	NA	NA	NA	NA	NA	TRUE	FALSE	NA	NA	NA	NA	NA	NA	NA	NA	NA	NA	NA	1.69679	2.03041	1.25477	4.6265	1.47578	3.32846	1.17337	0.0882358	0.106221	0.0652891	0.241746	0.0767624	0.173984	1.18048
CG43729	TRUE	FALSE	NA	NA	NA	NA	NA	NA	NA	NA	NA	NA	TRUE	FALSE	NA	NA	NA	NA	NA	NA	NA	NA	NA	NA	NA	17.1139	45.8621	12.9661	21.8755	15.04	33.8688	1.17115	0.152519	0.411189	0.115624	0.195896	0.134072	0.303542	1.17889
slo	TRUE	FALSE	NA	NA	NA	NA	NA	NA	NA	NA	NA	NA	TRUE	FALSE	NA	NA	NA	NA	NA	NA	NA	NA	NA	NA	NA	0.91209	3.27426	1.34897	1.80675	1.13053	2.54051	1.16812	0.0114712	0.0414281	0.016976	0.0228329	0.0142236	0.0321305	1.17566
ssp7	TRUE	FALSE	NA	NA	NA	NA	NA	NA	NA	NA	NA	NA	TRUE	FALSE	NA	NA	NA	NA	NA	NA	NA	NA	NA	NA	NA	0	2.03041	5.01908	9.25301	2.50954	5.64171	1.16871	0	0.71374	1.75481	3.24878	0.877407	1.98126	1.1751
GATAe	TRUE	FALSE	NA	NA	NA	NA	NA	NA	NA	NA	NA	NA	TRUE	FALSE	NA	NA	NA	NA	NA	NA	NA	NA	NA	NA	NA	1.76264	1.07079	0	2.88362	0.88132	1.97721	1.16573	0.0374013	0.0228579	0	0.0614828	0.0187007	0.0421704	1.17314
atk	TRUE	FALSE	NA	NA	NA	NA	NA	NA	NA	NA	NA	NA	TRUE	FALSE	NA	NA	NA	NA	NA	NA	NA	NA	NA	NA	NA	0.87018	1.04127	1.28699	3.79623	1.07858	2.41875	1.16513	0.010998	0.0132397	0.0162756	0.0482112	0.0136368	0.0307254	1.17193
CG15666	TRUE	FALSE	NA	NA	NA	NA	NA	NA	NA	NA	NA	NA	TRUE	FALSE	NA	NA	NA	NA	NA	NA	NA	NA	NA	NA	NA	0.848397	1.0152	1.25477	3.7012	1.05158	2.3582	1.16513	0.0182379	0.0219553	0.0269899	0.0799485	0.0226139	0.0509519	1.17193
exex	TRUE	FALSE	NA	NA	NA	NA	NA	NA	NA	NA	NA	NA	TRUE	FALSE	NA	NA	NA	NA	NA	NA	NA	NA	NA	NA	NA	0.848397	1.0152	1.25477	3.7012	1.05158	2.3582	1.16513	0.0230004	0.0276885	0.0340377	0.100825	0.028519	0.064257	1.17193
CG14880	TRUE	FALSE	NA	NA	NA	NA	NA	NA	NA	NA	NA	NA	TRUE	FALSE	NA	NA	NA	NA	NA	NA	NA	NA	NA	NA	NA	1.69952	1.01685	0	2.78038	0.849759	1.89862	1.15982	0.0419017	0.0252216	0	0.0688814	0.0209508	0.0470515	1.16723
CG34034	TRUE	FALSE	NA	NA	NA	NA	NA	NA	NA	NA	NA	NA	TRUE	FALSE	NA	NA	NA	NA	NA	NA	NA	NA	NA	NA	NA	1.69679	1.0152	0	2.7759	0.848397	1.89555	1.15981	0.228851	0.137749	0	0.376201	0.114425	0.256975	1.16722
CG8245	TRUE	FALSE	NA	NA	NA	NA	NA	NA	NA	NA	NA	NA	TRUE	FALSE	NA	NA	NA	NA	NA	NA	NA	NA	NA	NA	NA	1.69679	1.0152	0	2.7759	0.848397	1.89555	1.15981	0.0897367	0.0540138	0	0.147515	0.0448683	0.100764	1.16722
CG3301	TRUE	FALSE	NA	NA	NA	NA	NA	NA	NA	NA	NA	NA	TRUE	FALSE	NA	NA	NA	NA	NA	NA	NA	NA	NA	NA	NA	4.45306	7.26625	7.52862	19.4269	5.99084	13.3466	1.15564	0.325972	0.535109	0.551439	1.42894	0.438705	0.982027	1.16251
CG42446	TRUE	FALSE	NA	NA	NA	NA	NA	NA	NA	NA	NA	NA	TRUE	FALSE	NA	NA	NA	NA	NA	NA	NA	NA	NA	NA	NA	2.18422	2.49375	0	2.36907	1.09211	2.43141	1.15467	0.147127	0.168989	0	0.160349	0.0735635	0.164669	1.16251
CG32333	TRUE	FALSE	NA	NA	NA	NA	NA	NA	NA	NA	NA	NA	TRUE	FALSE	NA	NA	NA	NA	NA	NA	NA	NA	NA	NA	NA	0.848397	5.21774	1.91158	0.925301	1.37999	3.07152	1.15429	0.0107158	0.0663005	0.024159	0.0117435	0.0174374	0.039022	1.16211
CG6220	TRUE	FALSE	NA	NA	NA	NA	NA	NA	NA	NA	NA	NA	TRUE	FALSE	NA	NA	NA	NA	NA	NA	NA	NA	NA	NA	NA	0.850423	0	0	1.89075	0.425212	0.945375	1.15271	0.0409101	0	0	0.0913947	0.020455	0.0456973	1.15965
CG5819	TRUE	FALSE	NA	NA	NA	NA	NA	NA	NA	NA	NA	NA	TRUE	FALSE	NA	NA	NA	NA	NA	NA	NA	NA	NA	NA	NA	0.936989	1.12121	4.15739	10.1783	2.54719	5.64976	1.14928	0.0186242	0.0224204	0.0826847	0.203288	0.0506544	0.112854	1.1557
nompC	TRUE	FALSE	NA	NA	NA	NA	NA	NA	NA	NA	NA	NA	TRUE	FALSE	NA	NA	NA	NA	NA	NA	NA	NA	NA	NA	NA	2.63523	3.94524	1.29916	4.76614	1.9672	4.35569	1.14676	0.0253372	0.0381614	0.0124987	0.0460467	0.018918	0.0421041	1.1542
CG1571	TRUE	FALSE	NA	NA	NA	NA	NA	NA	NA	NA	NA	NA	TRUE	FALSE	NA	NA	NA	NA	NA	NA	NA	NA	NA	NA	NA	0	0	1.25477	2.7759	0.627385	1.38795	1.14553	0	0	0.0352846	0.0783891	0.0176423	0.0391946	1.15162
CG17571	TRUE	FALSE	NA	NA	NA	NA	NA	NA	NA	NA	NA	NA	TRUE	FALSE	NA	NA	NA	NA	NA	NA	NA	NA	NA	NA	NA	0	0	1.45134	3.21077	0.725671	1.60539	1.14553	0	0	0.0968258	0.215111	0.0484129	0.107555	1.15162
CR43847	FALSE	FALSE	NA	NA	NA	NA	NA	NA	NA	NA	NA	NA	FALSE	FALSE	NA	NA	NA	NA	NA	NA	NA	NA	NA	NA	NA	0	0	1.25477	2.7759	0.627385	1.38795	1.14553	0	0	0.101323	0.225102	0.0506616	0.112551	1.15162
CG18745	TRUE	FALSE	NA	NA	NA	NA	NA	NA	NA	NA	NA	NA	TRUE	FALSE	NA	NA	NA	NA	NA	NA	NA	NA	NA	NA	NA	0	0	1.25477	2.7759	0.627385	1.38795	1.14553	0	0	0.0542166	0.120449	0.0271083	0.0602245	1.15162
CG30339	TRUE	FALSE	NA	NA	NA	NA	NA	NA	NA	NA	NA	NA	TRUE	FALSE	NA	NA	NA	NA	NA	NA	NA	NA	NA	NA	NA	0	0	1.25477	2.7759	0.627385	1.38795	1.14553	0	0	0.0900104	0.199969	0.0450052	0.0999847	1.15162
CG5538	TRUE	FALSE	NA	NA	NA	NA	NA	NA	NA	NA	NA	NA	TRUE	FALSE	NA	NA	NA	NA	NA	NA	NA	NA	NA	NA	NA	0	0	1.25477	2.7759	0.627385	1.38795	1.14553	0	0	0.0656939	0.145947	0.0328469	0.0729736	1.15162
CG8249	TRUE	FALSE	NA	NA	NA	NA	NA	NA	NA	NA	NA	NA	TRUE	FALSE	NA	NA	NA	NA	NA	NA	NA	NA	NA	NA	NA	0	0	1.36185	3.01279	0.680925	1.5064	1.14553	0	0	0.0424789	0.0943723	0.0212395	0.0471862	1.15162
CR32252	FALSE	FALSE	NA	NA	NA	NA	NA	NA	NA	NA	NA	NA	FALSE	FALSE	NA	NA	NA	NA	NA	NA	NA	NA	NA	NA	NA	0	0	1.25477	2.7759	0.627385	1.38795	1.14553	0	0	0.0949662	0.210979	0.0474831	0.10549	1.15162
Obp57a	TRUE	FALSE	NA	NA	NA	NA	NA	NA	NA	NA	NA	NA	TRUE	FALSE	NA	NA	NA	NA	NA	NA	NA	NA	NA	NA	NA	0	0	1.25477	2.7759	0.627385	1.38795	1.14553	0	0	0.2066	0.458987	0.1033	0.229494	1.15162
CG9572	TRUE	FALSE	NA	NA	NA	NA	NA	NA	NA	NA	NA	NA	TRUE	FALSE	NA	NA	NA	NA	NA	NA	NA	NA	NA	NA	NA	2.74776	7.10536	5.01837	9.98943	3.88306	8.5474	1.13829	0.110799	0.288239	0.202479	0.404751	0.156639	0.346495	1.1454
DCX-EMAP	TRUE	FALSE	NA	NA	NA	NA	NA	NA	NA	NA	NA	NA	TRUE	FALSE	NA	NA	NA	NA	NA	NA	NA	NA	NA	NA	NA	2.23058	5.33829	1.6495	3.19755	1.94004	4.26792	1.13745	0.0355697	0.0856398	0.0263194	0.0512356	0.0309446	0.0684377	1.1451
CG11626	TRUE	FALSE	NA	NA	NA	NA	NA	NA	NA	NA	NA	NA	TRUE	FALSE	NA	NA	NA	NA	NA	NA	NA	NA	NA	NA	NA	1.69679	10.152	3.76431	1.8506	2.73055	6.00133	1.13609	0.062027	0.37335	0.137689	0.0679761	0.0998578	0.220663	1.1439
CG10651	TRUE	FALSE	NA	NA	NA	NA	NA	NA	NA	NA	NA	NA	TRUE	FALSE	NA	NA	NA	NA	NA	NA	NA	NA	NA	NA	NA	0.874518	0	1.2934	4.76895	1.08396	2.38447	1.13736	0.0617217	0	0.0913406	0.338208	0.0765311	0.169104	1.14379
CG6761	TRUE	FALSE	NA	NA	NA	NA	NA	NA	NA	NA	NA	NA	TRUE	FALSE	NA	NA	NA	NA	NA	NA	NA	NA	NA	NA	NA	0.869356	0	1.28577	4.7408	1.07756	2.3704	1.13736	0.0198094	0	0.0293155	0.108547	0.0245624	0.0542733	1.14379
CG10562	TRUE	FALSE	NA	NA	NA	NA	NA	NA	NA	NA	NA	NA	TRUE	FALSE	NA	NA	NA	NA	NA	NA	NA	NA	NA	NA	NA	2.54519	0	1.25477	8.32771	1.89998	4.16385	1.13193	0.113218	0	0.0558496	0.372231	0.0845339	0.186115	1.1386
Lrt	TRUE	FALSE	NA	NA	NA	NA	NA	NA	NA	NA	NA	NA	TRUE	FALSE	NA	NA	NA	NA	NA	NA	NA	NA	NA	NA	NA	3.39359	9.13684	6.27385	12.0289	4.83372	10.5829	1.13053	0.0579228	0.156891	0.107148	0.206304	0.0825356	0.181598	1.13766
CG14627	TRUE	FALSE	NA	NA	NA	NA	NA	NA	NA	NA	NA	NA	TRUE	FALSE	NA	NA	NA	NA	NA	NA	NA	NA	NA	NA	NA	0.894573	1.07046	0	0.879883	0.447287	0.975171	1.12446	0.0407132	0.0490117	0	0.0402379	0.0203566	0.0446248	1.13235
P5CDh2	TRUE	FALSE	NA	NA	NA	NA	NA	NA	NA	NA	NA	NA	TRUE	FALSE	NA	NA	NA	NA	NA	NA	NA	NA	NA	NA	NA	1.73086	0	0	3.77551	0.865428	1.88775	1.12518	0.0479137	0	0	0.105018	0.0239568	0.0525092	1.13213
CG18557	TRUE	FALSE	NA	NA	NA	NA	NA	NA	NA	NA	NA	NA	TRUE	FALSE	NA	NA	NA	NA	NA	NA	NA	NA	NA	NA	NA	0.848397	0	0	1.8506	0.424199	0.925301	1.12518	0.0573433	0	0	0.125686	0.0286716	0.0628431	1.13213
CG9812	TRUE	FALSE	NA	NA	NA	NA	NA	NA	NA	NA	NA	NA	TRUE	FALSE	NA	NA	NA	NA	NA	NA	NA	NA	NA	NA	NA	0.922964	0	0	2.01325	0.461482	1.00663	1.12518	0.0489433	0	0	0.107275	0.0244717	0.0536375	1.13213
CR44274	FALSE	FALSE	NA	NA	NA	NA	NA	NA	NA	NA	NA	NA	FALSE	FALSE	NA	NA	NA	NA	NA	NA	NA	NA	NA	NA	NA	0.848397	0	0	1.8506	0.424199	0.925301	1.12518	0.0832528	0	0	0.182475	0.0416264	0.0912377	1.13213
CR44718	FALSE	FALSE	NA	NA	NA	NA	NA	NA	NA	NA	NA	NA	FALSE	FALSE	NA	NA	NA	NA	NA	NA	NA	NA	NA	NA	NA	0.848397	0	0	1.8506	0.424199	0.925301	1.12518	0.0543579	0	0	0.119143	0.0271789	0.0595714	1.13213
CR45596	FALSE	FALSE	NA	NA	NA	NA	NA	NA	NA	NA	NA	NA	FALSE	FALSE	NA	NA	NA	NA	NA	NA	NA	NA	NA	NA	NA	0.848397	0	0	1.8506	0.424199	0.925301	1.12518	0.210584	0	0	0.461562	0.105292	0.230781	1.13213
Mal-B1	TRUE	FALSE	NA	NA	NA	NA	NA	NA	NA	NA	NA	NA	TRUE	FALSE	NA	NA	NA	NA	NA	NA	NA	NA	NA	NA	NA	0.848397	0	0	1.8506	0.424199	0.925301	1.12518	0.0310327	0	0	0.0680182	0.0155164	0.0340091	1.13213
CG42272	TRUE	FALSE	NA	NA	NA	NA	NA	NA	NA	NA	NA	NA	TRUE	FALSE	NA	NA	NA	NA	NA	NA	NA	NA	NA	NA	NA	0.890486	0	0	1.94241	0.445243	0.971204	1.12518	0.030137	0	0	0.066055	0.0150685	0.0330275	1.13213
CG42656	TRUE	FALSE	NA	NA	NA	NA	NA	NA	NA	NA	NA	NA	TRUE	FALSE	NA	NA	NA	NA	NA	NA	NA	NA	NA	NA	NA	0.848397	0	0	1.8506	0.424199	0.925301	1.12518	0.73244	0	0	1.60538	0.36622	0.802689	1.13213
CR44197	FALSE	FALSE	NA	NA	NA	NA	NA	NA	NA	NA	NA	NA	FALSE	FALSE	NA	NA	NA	NA	NA	NA	NA	NA	NA	NA	NA	0.848397	0	0	1.8506	0.424199	0.925301	1.12518	0.0898176	0	0	0.196864	0.0449088	0.0984321	1.13213
CR45251	FALSE	FALSE	NA	NA	NA	NA	NA	NA	NA	NA	NA	NA	FALSE	FALSE	NA	NA	NA	NA	NA	NA	NA	NA	NA	NA	NA	0.848397	0	0	1.8506	0.424199	0.925301	1.12518	0.333623	0	0	0.731243	0.166812	0.365622	1.13213
CR45611	FALSE	FALSE	NA	NA	NA	NA	NA	NA	NA	NA	NA	NA	FALSE	FALSE	NA	NA	NA	NA	NA	NA	NA	NA	NA	NA	NA	0.848397	0	0	1.8506	0.424199	0.925301	1.12518	0.0858188	0	0	0.1881	0.0429094	0.0940498	1.13213
Ir76b	TRUE	FALSE	NA	NA	NA	NA	NA	NA	NA	NA	NA	NA	TRUE	FALSE	NA	NA	NA	NA	NA	NA	NA	NA	NA	NA	NA	0.848397	0	0	1.8506	0.424199	0.925301	1.12518	0.0237638	0	0	0.052086	0.0118819	0.026043	1.13213
Ubc84D	TRUE	FALSE	NA	NA	NA	NA	NA	NA	NA	NA	NA	NA	TRUE	FALSE	NA	NA	NA	NA	NA	NA	NA	NA	NA	NA	NA	0.848397	0	0	1.8506	0.424199	0.925301	1.12518	0.114425	0	0	0.2508	0.0572127	0.1254	1.13213
sca	TRUE	FALSE	NA	NA	NA	NA	NA	NA	NA	NA	NA	NA	TRUE	FALSE	NA	NA	NA	NA	NA	NA	NA	NA	NA	NA	NA	1.98836	2.65613	0	1.61394	0.994181	2.13503	1.10268	0.0374432	0.0503196	0	0.0305391	0.0187216	0.0404293	1.1107
CG43998	TRUE	FALSE	NA	NA	NA	NA	NA	NA	NA	NA	NA	NA	TRUE	FALSE	NA	NA	NA	NA	NA	NA	NA	NA	NA	NA	NA	5.38194	6.87948	3.13693	11.3117	4.25943	9.09559	1.09451	0.35365	0.454779	0.206253	0.746886	0.279951	0.600833	1.10179
Idgf1	TRUE	FALSE	NA	NA	NA	NA	NA	NA	NA	NA	NA	NA	TRUE	FALSE	NA	NA	NA	NA	NA	NA	NA	NA	NA	NA	NA	3.39359	7.10643	1.25477	2.7759	2.32418	4.94117	1.08813	0.160892	0.338952	0.0595252	0.132243	0.110209	0.235597	1.09608
CG6426	TRUE	FALSE	NA	NA	NA	NA	NA	NA	NA	NA	NA	NA	TRUE	FALSE	NA	NA	NA	NA	NA	NA	NA	NA	NA	NA	NA	0.848397	6.09123	3.76431	3.7012	2.30635	4.89622	1.08605	0.0975063	0.704286	0.432892	0.427433	0.265199	0.56586	1.09337
CG13877	TRUE	FALSE	NA	NA	NA	NA	NA	NA	NA	NA	NA	NA	TRUE	FALSE	NA	NA	NA	NA	NA	NA	NA	NA	NA	NA	NA	1.74935	2.45614	1.51787	4.47726	1.63361	3.4667	1.0855	0.393685	0.556077	0.341795	1.01245	0.36774	0.784266	1.09266
CG14606	TRUE	FALSE	NA	NA	NA	NA	NA	NA	NA	NA	NA	NA	TRUE	FALSE	NA	NA	NA	NA	NA	NA	NA	NA	NA	NA	NA	3.33264	5.17059	0	1.88508	1.66632	3.52783	1.08212	0.116148	0.18129	0	0.0660153	0.058074	0.123653	1.09033
CG10680	TRUE	FALSE	NA	NA	NA	NA	NA	NA	NA	NA	NA	NA	TRUE	FALSE	NA	NA	NA	NA	NA	NA	NA	NA	NA	NA	NA	1.94916	5.83099	4.32418	7.44046	3.13667	6.63572	1.08102	0.121204	0.364773	0.269052	0.464903	0.195128	0.414838	1.08813
CG34354	TRUE	FALSE	NA	NA	NA	NA	NA	NA	NA	NA	NA	NA	TRUE	FALSE	NA	NA	NA	NA	NA	NA	NA	NA	NA	NA	NA	0	4.30779	2.66169	1.31901	1.33084	2.8134	1.07998	0	0.0822127	0.0505233	0.0251429	0.0252616	0.0536778	1.08738
Adgf-D	TRUE	FALSE	NA	NA	NA	NA	NA	NA	NA	NA	NA	NA	TRUE	FALSE	NA	NA	NA	NA	NA	NA	NA	NA	NA	NA	NA	1.69679	6.09123	2.50954	2.7759	2.10317	4.43357	1.0759	0.0708881	0.256011	0.104906	0.116531	0.0878969	0.186271	1.08352
CG31287	TRUE	FALSE	NA	NA	NA	NA	NA	NA	NA	NA	NA	NA	TRUE	FALSE	NA	NA	NA	NA	NA	NA	NA	NA	NA	NA	NA	2.49398	7.94013	1.96276	1.44739	2.22837	4.69376	1.07476	0.163517	0.52373	0.128765	0.0953561	0.146141	0.309543	1.08278
CR44914	FALSE	FALSE	NA	NA	NA	NA	NA	NA	NA	NA	NA	NA	FALSE	FALSE	NA	NA	NA	NA	NA	NA	NA	NA	NA	NA	NA	3.73561	6.70513	1.38123	4.07423	2.55842	5.38968	1.07495	0.224493	0.405376	0.0830554	0.246024	0.153774	0.3257	1.08273
Karl	TRUE	FALSE	NA	NA	NA	NA	NA	NA	NA	NA	NA	NA	TRUE	FALSE	NA	NA	NA	NA	NA	NA	NA	NA	NA	NA	NA	2.91685	8.14416	4.45184	7.37813	3.68434	7.76115	1.07486	0.123342	0.34646	0.188364	0.313498	0.155853	0.329979	1.08219
Scgalpha	TRUE	FALSE	NA	NA	NA	NA	NA	NA	NA	NA	NA	NA	TRUE	FALSE	NA	NA	NA	NA	NA	NA	NA	NA	NA	NA	NA	4.24199	9.13684	4.07451	8.32771	4.15825	8.73228	1.07038	0.171872	0.372428	0.165186	0.339042	0.168529	0.355735	1.07781
KFase	TRUE	FALSE	NA	NA	NA	NA	NA	NA	NA	NA	NA	NA	TRUE	FALSE	NA	NA	NA	NA	NA	NA	NA	NA	NA	NA	NA	2.07821	6.00444	1.53682	1.56363	1.80751	3.78404	1.06592	0.124827	0.36283	0.0923643	0.0943725	0.108596	0.228601	1.07387
AkhR	TRUE	FALSE	NA	NA	NA	NA	NA	NA	NA	NA	NA	NA	TRUE	FALSE	NA	NA	NA	NA	NA	NA	NA	NA	NA	NA	NA	0.693306	2.35004	1.4523	2.14192	1.0728	2.24598	1.06596	0.0194104	0.0661905	0.0406843	0.0602567	0.0300474	0.0632236	1.07322
CR45732	FALSE	FALSE	NA	NA	NA	NA	NA	NA	NA	NA	NA	NA	FALSE	FALSE	NA	NA	NA	NA	NA	NA	NA	NA	NA	NA	NA	2.54519	4.06082	2.50954	6.47711	2.52737	5.26896	1.05988	0.150655	0.241817	0.148634	0.385244	0.149645	0.313531	1.06707
Notum	TRUE	FALSE	NA	NA	NA	NA	NA	NA	NA	NA	NA	NA	TRUE	FALSE	NA	NA	NA	NA	NA	NA	NA	NA	NA	NA	NA	3.39359	6.09123	0	0.925301	1.69679	3.50826	1.04795	0.0557948	0.100751	0	0.0152866	0.0278974	0.0580189	1.05639
CG42369	TRUE	FALSE	NA	NA	NA	NA	NA	NA	NA	NA	NA	NA	TRUE	FALSE	NA	NA	NA	NA	NA	NA	NA	NA	NA	NA	NA	3.39359	4.06082	1.25477	5.55181	2.32418	4.80631	1.04821	0.167339	0.201447	0.0619102	0.275082	0.114624	0.238265	1.05565
CG42751	TRUE	FALSE	NA	NA	NA	NA	NA	NA	NA	NA	NA	NA	TRUE	FALSE	NA	NA	NA	NA	NA	NA	NA	NA	NA	NA	NA	2.54519	5.07602	1.25477	2.7759	1.89998	3.92596	1.04706	0.674245	1.35279	0.3326	0.738912	0.503422	1.04585	1.05484
Ssl2	TRUE	FALSE	NA	NA	NA	NA	NA	NA	NA	NA	NA	NA	TRUE	FALSE	NA	NA	NA	NA	NA	NA	NA	NA	NA	NA	NA	2.54519	5.07602	1.25477	2.7759	1.89998	3.92596	1.04706	0.113904	0.228535	0.0561881	0.124829	0.0850462	0.176682	1.05484
CR44031	FALSE	FALSE	NA	NA	NA	NA	NA	NA	NA	NA	NA	NA	FALSE	FALSE	NA	NA	NA	NA	NA	NA	NA	NA	NA	NA	NA	0	3.13614	2.43913	1.90561	1.21957	2.52088	1.04756	0	0.384292	0.29727	0.233228	0.148635	0.30876	1.05471
CG3277	TRUE	FALSE	NA	NA	NA	NA	NA	NA	NA	NA	NA	NA	TRUE	FALSE	NA	NA	NA	NA	NA	NA	NA	NA	NA	NA	NA	1.69679	3.04561	2.50954	5.55181	2.10317	4.29871	1.03134	0.0305969	0.0552502	0.0452797	0.100594	0.0379383	0.0779223	1.03838
CG31627	TRUE	FALSE	NA	NA	NA	NA	NA	NA	NA	NA	NA	NA	TRUE	FALSE	NA	NA	NA	NA	NA	NA	NA	NA	NA	NA	NA	2.54519	4.06082	1.25477	3.7012	1.89998	3.88101	1.03045	0.213875	0.343292	0.105503	0.312518	0.159689	0.327905	1.03801
CR44608	FALSE	FALSE	NA	NA	NA	NA	NA	NA	NA	NA	NA	NA	FALSE	FALSE	NA	NA	NA	NA	NA	NA	NA	NA	NA	NA	NA	2.54519	4.06082	1.25477	3.7012	1.89998	3.88101	1.03045	0.443527	0.711908	0.218789	0.648089	0.331158	0.679998	1.03801
Sh	TRUE	FALSE	NA	NA	NA	NA	NA	NA	NA	NA	NA	NA	TRUE	FALSE	NA	NA	NA	NA	NA	NA	NA	NA	NA	NA	NA	0.354478	5.10987	2.78486	1.30147	1.56967	3.20567	1.03016	0.00867989	0.125877	0.0682322	0.0320221	0.0384561	0.0789494	1.03772
CR44062	FALSE	FALSE	NA	NA	NA	NA	NA	NA	NA	NA	NA	NA	FALSE	FALSE	NA	NA	NA	NA	NA	NA	NA	NA	NA	NA	NA	1.69679	5.07602	1.25477	0.925301	1.47578	3.00066	1.0238	0.102701	0.309085	0.0759923	0.0562755	0.0893465	0.18268	1.03184
CG4995	TRUE	FALSE	NA	NA	NA	NA	NA	NA	NA	NA	NA	NA	TRUE	FALSE	NA	NA	NA	NA	NA	NA	NA	NA	NA	NA	NA	1.91016	3.29433	1.41255	3.44139	1.66136	3.36786	1.01947	0.0996381	0.172875	0.0737261	0.180377	0.0866821	0.176626	1.02689
nsr	TRUE	FALSE	NA	NA	NA	NA	NA	NA	NA	NA	NA	NA	TRUE	FALSE	NA	NA	NA	NA	NA	NA	NA	NA	NA	NA	NA	4.12735	6.10577	4.06953	10.5034	4.09844	8.30461	1.01884	0.145129	0.215991	0.143182	0.371114	0.144156	0.293552	1.02599
CG11321	TRUE	FALSE	NA	NA	NA	NA	NA	NA	NA	NA	NA	NA	TRUE	FALSE	NA	NA	NA	NA	NA	NA	NA	NA	NA	NA	NA	8.14709	24.3723	12.0495	16.4403	10.0983	20.4063	1.01491	0.177724	0.534874	0.26301	0.360366	0.220367	0.44762	1.02237
CG14212	TRUE	FALSE	NA	NA	NA	NA	NA	NA	NA	NA	NA	NA	TRUE	FALSE	NA	NA	NA	NA	NA	NA	NA	NA	NA	NA	NA	3.39359	4.06082	0	2.7759	1.69679	3.41836	1.01049	0.28721	0.345751	0	0.236067	0.143605	0.290909	1.01847
CR45549	FALSE	FALSE	NA	NA	NA	NA	NA	NA	NA	NA	NA	NA	FALSE	FALSE	NA	NA	NA	NA	NA	NA	NA	NA	NA	NA	NA	3.39359	4.06082	0	2.7759	1.69679	3.41836	1.01049	0.476184	0.573245	0	0.391392	0.238092	0.482318	1.01847
CG1231	TRUE	FALSE	NA	NA	NA	NA	NA	NA	NA	NA	NA	NA	TRUE	FALSE	NA	NA	NA	NA	NA	NA	NA	NA	NA	NA	NA	0.848397	3.04561	2.50954	3.7012	1.67897	3.37341	1.00663	0.0480057	0.173372	0.142085	0.21044	0.0950454	0.191906	1.01371
bi	TRUE	FALSE	NA	NA	NA	NA	NA	NA	NA	NA	NA	NA	TRUE	FALSE	NA	NA	NA	NA	NA	NA	NA	NA	NA	NA	NA	0.930614	4.45435	2.04085	1.50495	1.48573	2.97965	1.00397	0.013021	0.0627001	0.0285723	0.0211586	0.0207966	0.0419294	1.01161
Tsp	TRUE	FALSE	NA	NA	NA	NA	NA	NA	NA	NA	NA	NA	TRUE	FALSE	NA	NA	NA	NA	NA	NA	NA	NA	NA	NA	NA	4.68542	7.63708	0.658224	3.06609	2.67182	5.35158	1.00214	0.130991	0.214798	0.0184131	0.086133	0.0747021	0.150466	1.01021
robls54B	TRUE	FALSE	NA	NA	NA	NA	NA	NA	NA	NA	NA	NA	TRUE	FALSE	NA	NA	NA	NA	NA	NA	NA	NA	NA	NA	NA	0.655054	0	0	1.31277	0.327527	0.656387	1.00293	0.138449	0	0	0.278801	0.0692245	0.139401	1.00988
Gr64a	TRUE	FALSE	NA	NA	NA	NA	NA	NA	NA	NA	NA	NA	TRUE	FALSE	NA	NA	NA	NA	NA	NA	NA	NA	NA	NA	NA	1.69679	4.06082	1.25477	1.8506	1.47578	2.95571	1.00203	0.0777624	0.187225	0.0575394	0.0852207	0.0676509	0.136223	1.00979
CG30480	TRUE	FALSE	NA	NA	NA	NA	NA	NA	NA	NA	NA	NA	TRUE	FALSE	NA	NA	NA	NA	NA	NA	NA	NA	NA	NA	NA	0	3.31749	2.73356	2.13804	1.36678	2.72776	0.996938	0	0.0654137	0.0536091	0.0421072	0.0268045	0.0537604	1.00407
CG11617	TRUE	FALSE	NA	NA	NA	NA	NA	NA	NA	NA	NA	NA	TRUE	FALSE	NA	NA	NA	NA	NA	NA	NA	NA	NA	NA	NA	3.44321	4.1202	0	2.73646	1.72161	3.42833	0.993752	0.189124	0.227673	0	0.151031	0.0945621	0.189352	1.00174
CG7442	TRUE	FALSE	NA	NA	NA	NA	NA	NA	NA	NA	NA	NA	TRUE	FALSE	NA	NA	NA	NA	NA	NA	NA	NA	NA	NA	NA	1.69679	7.10643	3.76431	3.7012	2.73055	5.40382	0.984786	0.0531472	0.22393	0.117977	0.116489	0.0855621	0.17021	0.992271
CG12950	TRUE	FALSE	NA	NA	NA	NA	NA	NA	NA	NA	NA	NA	TRUE	FALSE	NA	NA	NA	NA	NA	NA	NA	NA	NA	NA	NA	3.06025	5.49291	1.40816	3.33764	2.2342	4.41528	0.982744	0.0473926	0.0855789	0.0218206	0.0519381	0.0346066	0.0687585	0.990492
Gypsy4_LTR|Drosophila_fruit_fly_genus	FALSE	TRUE	NA	NA	NA	NA	NA	NA	NA	NA	NA	NA	FALSE	TRUE	NA	NA	NA	NA	NA	NA	NA	NA	NA	NA	NA	1.69679	3.04561	1.25477	2.7759	1.47578	2.91076	0.979915	1.08377	1.95702	0.801927	1.78158	0.942851	1.8693	0.987397
CG43172	TRUE	FALSE	NA	NA	NA	NA	NA	NA	NA	NA	NA	NA	TRUE	FALSE	NA	NA	NA	NA	NA	NA	NA	NA	NA	NA	NA	1.02601	1.22774	0	0.78876	0.513003	1.00825	0.97481	0.246886	0.297209	0	0.190714	0.123443	0.243961	0.982808
CR45604	FALSE	FALSE	NA	NA	NA	NA	NA	NA	NA	NA	NA	NA	FALSE	FALSE	NA	NA	NA	NA	NA	NA	NA	NA	NA	NA	NA	3.39359	2.03041	0	4.6265	1.69679	3.32846	0.972042	0.0350841	0.0211177	0	0.0480614	0.0175421	0.0345895	0.979516
CG16786	TRUE	FALSE	NA	NA	NA	NA	NA	NA	NA	NA	NA	NA	TRUE	FALSE	NA	NA	NA	NA	NA	NA	NA	NA	NA	NA	NA	2.55985	4.08422	0	0.930632	1.27993	2.50743	0.970147	0.0578055	0.0927842	0	0.0211166	0.0289028	0.0569504	0.978499
Cyp28d2	TRUE	FALSE	NA	NA	NA	NA	NA	NA	NA	NA	NA	NA	TRUE	FALSE	NA	NA	NA	NA	NA	NA	NA	NA	NA	NA	NA	2.54519	4.06082	0	0.925301	1.2726	2.49306	0.970143	0.102004	0.163727	0	0.0372624	0.0510019	0.100495	0.978495
CR45146	FALSE	FALSE	NA	NA	NA	NA	NA	NA	NA	NA	NA	NA	FALSE	FALSE	NA	NA	NA	NA	NA	NA	NA	NA	NA	NA	NA	0	3.04561	2.50954	1.8506	1.25477	2.44811	0.964244	0	0.287303	0.235456	0.174365	0.117728	0.230834	0.971398
CG11509	TRUE	FALSE	NA	NA	NA	NA	NA	NA	NA	NA	NA	NA	TRUE	FALSE	NA	NA	NA	NA	NA	NA	NA	NA	NA	NA	NA	0	3.04561	2.50954	1.8506	1.25477	2.44811	0.964244	0	0.333336	0.273182	0.202303	0.136591	0.267819	0.971398
CG6209	TRUE	FALSE	NA	NA	NA	NA	NA	NA	NA	NA	NA	NA	TRUE	FALSE	NA	NA	NA	NA	NA	NA	NA	NA	NA	NA	NA	2.54519	6.09123	2.50954	3.7012	2.52737	4.89622	0.954033	0.0789257	0.190026	0.0778669	0.115327	0.0783963	0.152677	0.961623
CG13607	TRUE	FALSE	NA	NA	NA	NA	NA	NA	NA	NA	NA	NA	TRUE	FALSE	NA	NA	NA	NA	NA	NA	NA	NA	NA	NA	NA	0.8662	3.10953	5.1244	8.50246	2.9953	5.80599	0.954841	0.0259678	0.0937823	0.153717	0.256125	0.0898421	0.174954	0.96151
CG31823	TRUE	FALSE	NA	NA	NA	NA	NA	NA	NA	NA	NA	NA	TRUE	FALSE	NA	NA	NA	NA	NA	NA	NA	NA	NA	NA	NA	2.54519	3.04561	0	1.8506	1.2726	2.44811	0.943893	0.124878	0.150332	0	0.0912372	0.0624392	0.120785	0.951914
Gypsy5_LTR|Drosophila_fruit_fly_genus	FALSE	TRUE	NA	NA	NA	NA	NA	NA	NA	NA	NA	NA	FALSE	TRUE	NA	NA	NA	NA	NA	NA	NA	NA	NA	NA	NA	2.54519	3.04561	0	1.8506	1.2726	2.44811	0.943893	0.650895	0.783566	0	0.475549	0.325448	0.629558	0.951914
Ance-4	TRUE	FALSE	NA	NA	NA	NA	NA	NA	NA	NA	NA	NA	TRUE	FALSE	NA	NA	NA	NA	NA	NA	NA	NA	NA	NA	NA	0	2.06524	2.55259	2.82352	1.27629	2.44438	0.937507	0	0.0689918	0.0848122	0.0942104	0.0424061	0.0816011	0.944317
Nplp4	TRUE	FALSE	NA	NA	NA	NA	NA	NA	NA	NA	NA	NA	TRUE	FALSE	NA	NA	NA	NA	NA	NA	NA	NA	NA	NA	NA	2.63043	5.50831	1.7676	2.86886	2.19901	4.18859	0.929607	0.609345	1.28371	0.409716	0.667788	0.50953	0.975748	0.93734
sob	TRUE	FALSE	NA	NA	NA	NA	NA	NA	NA	NA	NA	NA	TRUE	FALSE	NA	NA	NA	NA	NA	NA	NA	NA	NA	NA	NA	2.54519	2.03041	0	2.7759	1.2726	2.40316	0.917156	0.0623355	0.0500276	0	0.0683142	0.0311678	0.0591709	0.924833
CR45177	FALSE	FALSE	NA	NA	NA	NA	NA	NA	NA	NA	NA	NA	FALSE	FALSE	NA	NA	NA	NA	NA	NA	NA	NA	NA	NA	NA	0.848397	3.04561	1.25477	0.925301	1.05158	1.98546	0.916908	0.207962	0.751053	0.307759	0.227908	0.257861	0.489481	0.924661
CG32036	TRUE	FALSE	NA	NA	NA	NA	NA	NA	NA	NA	NA	NA	TRUE	FALSE	NA	NA	NA	NA	NA	NA	NA	NA	NA	NA	NA	0.848397	3.04561	1.25477	0.925301	1.05158	1.98546	0.916908	0.0982711	0.354905	0.145429	0.107696	0.12185	0.231301	0.924661
CG3246	TRUE	FALSE	NA	NA	NA	NA	NA	NA	NA	NA	NA	NA	TRUE	FALSE	NA	NA	NA	NA	NA	NA	NA	NA	NA	NA	NA	2.54519	4.06082	5.01908	10.1783	3.78214	7.11956	0.912588	0.114599	0.183943	0.226123	0.460497	0.170361	0.32222	0.919453
CG42512	TRUE	FALSE	NA	NA	NA	NA	NA	NA	NA	NA	NA	NA	TRUE	FALSE	NA	NA	NA	NA	NA	NA	NA	NA	NA	NA	NA	7.39417	14.8301	6.00674	10.3382	6.70045	12.5841	0.909274	0.436583	0.880908	0.354876	0.613357	0.395729	0.747132	0.91685
Cyp4p1	TRUE	FALSE	NA	NA	NA	NA	NA	NA	NA	NA	NA	NA	TRUE	FALSE	NA	NA	NA	NA	NA	NA	NA	NA	NA	NA	NA	3.39359	4.06082	1.25477	4.6265	2.32418	4.34366	0.90219	0.135362	0.162953	0.0500799	0.185431	0.092721	0.174192	0.90971
CG31076	TRUE	FALSE	NA	NA	NA	NA	NA	NA	NA	NA	NA	NA	TRUE	FALSE	NA	NA	NA	NA	NA	NA	NA	NA	NA	NA	NA	1.69679	5.07602	2.50954	2.7759	2.10317	3.92596	0.900483	0.240954	0.725168	0.356582	0.396096	0.298768	0.560632	0.908029
KP78b	TRUE	FALSE	NA	NA	NA	NA	NA	NA	NA	NA	NA	NA	TRUE	FALSE	NA	NA	NA	NA	NA	NA	NA	NA	NA	NA	NA	4.5998	8.6206	3.04425	5.61227	3.82202	7.11644	0.896819	0.0816484	0.153942	0.0540692	0.100101	0.0678588	0.127022	0.904466
GABA-B-R1	TRUE	FALSE	NA	NA	NA	NA	NA	NA	NA	NA	NA	NA	TRUE	FALSE	NA	NA	NA	NA	NA	NA	NA	NA	NA	NA	NA	3.16914	8.53253	2.34356	1.7282	2.75635	5.13037	0.896304	0.0368309	0.0997608	0.0272526	0.0201817	0.0320418	0.0599713	0.904317
SclA	TRUE	FALSE	NA	NA	NA	NA	NA	NA	NA	NA	NA	NA	TRUE	FALSE	NA	NA	NA	NA	NA	NA	NA	NA	NA	NA	NA	2.64765	7.8135	5.08979	6.59053	3.86872	7.20202	0.896544	0.207162	0.615041	0.398482	0.518155	0.302822	0.566598	0.903857
CG15528	TRUE	FALSE	NA	NA	NA	NA	NA	NA	NA	NA	NA	NA	TRUE	FALSE	NA	NA	NA	NA	NA	NA	NA	NA	NA	NA	NA	0.848397	2.03041	1.25477	1.8506	1.05158	1.94051	0.883869	0.0601657	0.144858	0.0890379	0.131873	0.0746018	0.138365	0.891202
CR44958	FALSE	FALSE	NA	NA	NA	NA	NA	NA	NA	NA	NA	NA	FALSE	FALSE	NA	NA	NA	NA	NA	NA	NA	NA	NA	NA	NA	0.848397	2.03041	1.25477	1.8506	1.05158	1.94051	0.883869	0.0448683	0.108028	0.0663996	0.0983434	0.055634	0.103186	0.891202
Lcch3	TRUE	FALSE	NA	NA	NA	NA	NA	NA	NA	NA	NA	NA	TRUE	FALSE	NA	NA	NA	NA	NA	NA	NA	NA	NA	NA	NA	0.848397	2.03041	1.25477	1.8506	1.05158	1.94051	0.883869	0.0294119	0.0708137	0.043526	0.0644656	0.0364689	0.0676397	0.891202
CG2650	TRUE	FALSE	NA	NA	NA	NA	NA	NA	NA	NA	NA	NA	TRUE	FALSE	NA	NA	NA	NA	NA	NA	NA	NA	NA	NA	NA	1.69679	4.06082	2.50954	3.7012	2.10317	3.88101	0.883869	0.12314	0.296479	0.182232	0.269901	0.152686	0.28319	0.891202
CG31546	TRUE	FALSE	NA	NA	NA	NA	NA	NA	NA	NA	NA	NA	TRUE	FALSE	NA	NA	NA	NA	NA	NA	NA	NA	NA	NA	NA	0.848397	2.03041	1.25477	1.8506	1.05158	1.94051	0.883869	0.0626475	0.150834	0.0927107	0.137312	0.0776791	0.144073	0.891202
esg	TRUE	FALSE	NA	NA	NA	NA	NA	NA	NA	NA	NA	NA	TRUE	FALSE	NA	NA	NA	NA	NA	NA	NA	NA	NA	NA	NA	0.848397	2.03041	1.25477	1.8506	1.05158	1.94051	0.883869	0.0241648	0.0581806	0.0357609	0.052965	0.0299629	0.0555728	0.891202
dpr	TRUE	FALSE	NA	NA	NA	NA	NA	NA	NA	NA	NA	NA	TRUE	FALSE	NA	NA	NA	NA	NA	NA	NA	NA	NA	NA	NA	0	1.80969	1.42907	0.824713	0.714535	1.3172	0.882397	0	0.0355005	0.0278828	0.016159	0.0139414	0.0258298	0.889663
CG15829	TRUE	FALSE	NA	NA	NA	NA	NA	NA	NA	NA	NA	NA	TRUE	FALSE	NA	NA	NA	NA	NA	NA	NA	NA	NA	NA	NA	4.36406	8.7035	2.15147	3.1731	3.25776	5.9383	0.866168	0.733435	1.47155	0.361798	0.535853	0.547617	1.0037	0.874093
CR44996	FALSE	FALSE	NA	NA	NA	NA	NA	NA	NA	NA	NA	NA	FALSE	FALSE	NA	NA	NA	NA	NA	NA	NA	NA	NA	NA	NA	2.54519	5.07602	1.25477	1.8506	1.89998	3.46331	0.866168	0.104412	0.209491	0.0515058	0.0762843	0.077959	0.142888	0.874093
ru	TRUE	FALSE	NA	NA	NA	NA	NA	NA	NA	NA	NA	NA	TRUE	FALSE	NA	NA	NA	NA	NA	NA	NA	NA	NA	NA	NA	0	4.06082	3.76431	2.7759	1.88216	3.41836	0.860919	0	0.150928	0.139152	0.103048	0.0695762	0.126988	0.868025
Gr43a	TRUE	FALSE	NA	NA	NA	NA	NA	NA	NA	NA	NA	NA	TRUE	FALSE	NA	NA	NA	NA	NA	NA	NA	NA	NA	NA	NA	4.22295	2.13762	0	5.50164	2.11148	3.81963	0.85518	0.189563	0.0965334	0	0.248154	0.0947815	0.172344	0.862611
CG15082	TRUE	FALSE	NA	NA	NA	NA	NA	NA	NA	NA	NA	NA	TRUE	FALSE	NA	NA	NA	NA	NA	NA	NA	NA	NA	NA	NA	1.18129	1.41355	0	0.721873	0.590646	1.06771	0.854157	0.0516148	0.0621354	0	0.0316934	0.0258074	0.0469144	0.862246
tey	TRUE	FALSE	NA	NA	NA	NA	NA	NA	NA	NA	NA	NA	TRUE	FALSE	NA	NA	NA	NA	NA	NA	NA	NA	NA	NA	NA	3.88602	4.29266	2.40581	7.05443	3.14592	5.67355	0.85077	0.082844	0.0920646	0.0513191	0.151116	0.0670815	0.12159	0.858039
CG12105	TRUE	FALSE	NA	NA	NA	NA	NA	NA	NA	NA	NA	NA	TRUE	FALSE	NA	NA	NA	NA	NA	NA	NA	NA	NA	NA	NA	0.736793	2.64497	2.95752	4.0179	1.84716	3.33144	0.850837	0.0102135	0.036886	0.0410222	0.0559655	0.0256178	0.0464257	0.857776
CG15199	TRUE	FALSE	NA	NA	NA	NA	NA	NA	NA	NA	NA	NA	TRUE	FALSE	NA	NA	NA	NA	NA	NA	NA	NA	NA	NA	NA	1.03489	1.23837	1.53059	3.3861	1.28274	2.31223	0.850056	0.155166	0.186793	0.229627	0.510145	0.192396	0.348469	0.856949
CG43255	TRUE	FALSE	NA	NA	NA	NA	NA	NA	NA	NA	NA	NA	TRUE	FALSE	NA	NA	NA	NA	NA	NA	NA	NA	NA	NA	NA	0.848397	1.0152	1.25477	2.7759	1.05158	1.89555	0.850056	0.172229	0.207335	0.254878	0.566244	0.213554	0.38679	0.856949
Cyp9h1	TRUE	FALSE	NA	NA	NA	NA	NA	NA	NA	NA	NA	NA	TRUE	FALSE	NA	NA	NA	NA	NA	NA	NA	NA	NA	NA	NA	2.54519	4.06082	1.25477	2.7759	1.89998	3.41836	0.84732	0.106032	0.170193	0.0523049	0.116202	0.0791685	0.143197	0.855006
CG9760	TRUE	FALSE	NA	NA	NA	NA	NA	NA	NA	NA	NA	NA	TRUE	FALSE	NA	NA	NA	NA	NA	NA	NA	NA	NA	NA	NA	4.24199	7.10643	1.25477	2.7759	2.74838	4.94117	0.846272	0.13619	0.229529	0.0403088	0.0895511	0.0882493	0.15954	0.854262
CG13891	TRUE	FALSE	NA	NA	NA	NA	NA	NA	NA	NA	NA	NA	TRUE	FALSE	NA	NA	NA	NA	NA	NA	NA	NA	NA	NA	NA	1.69679	3.04561	0	0	0.848397	1.52281	0.843922	0.178357	0.322066	0	0	0.0891783	0.161033	0.852593
CR44201	FALSE	FALSE	NA	NA	NA	NA	NA	NA	NA	NA	NA	NA	FALSE	FALSE	NA	NA	NA	NA	NA	NA	NA	NA	NA	NA	NA	1.69679	3.04561	0	0	0.848397	1.52281	0.843922	0.100236	0.181	0	0	0.050118	0.0905002	0.852593
croc	TRUE	FALSE	NA	NA	NA	NA	NA	NA	NA	NA	NA	NA	TRUE	FALSE	NA	NA	NA	NA	NA	NA	NA	NA	NA	NA	NA	1.69679	3.04561	0	0	0.848397	1.52281	0.843922	0.0466646	0.0842643	0	0	0.0233323	0.0421322	0.852593
MINOS|Drosophila_fruit_fly_genus	FALSE	TRUE	NA	NA	NA	NA	NA	NA	NA	NA	NA	NA	FALSE	TRUE	NA	NA	NA	NA	NA	NA	NA	NA	NA	NA	NA	1.69679	3.04561	0	0	0.848397	1.52281	0.843922	0.0636013	0.114848	0	0	0.0318007	0.0574238	0.852593
CG43064	TRUE	FALSE	NA	NA	NA	NA	NA	NA	NA	NA	NA	NA	TRUE	FALSE	NA	NA	NA	NA	NA	NA	NA	NA	NA	NA	NA	2.94914	3.58604	1.47742	4.35796	2.21328	3.972	0.843678	0.111249	0.13609	0.0557657	0.165187	0.0835075	0.150639	0.851116
iab-4	FALSE	FALSE	NA	NA	NA	NA	NA	NA	NA	NA	NA	NA	FALSE	FALSE	NA	NA	NA	NA	NA	NA	NA	NA	NA	NA	NA	0.252318	1.1219	0.373175	0	0.312746	0.560951	0.842883	0.0083879	0.0375207	0.0124131	0	0.0104005	0.0187604	0.851037
CG43155	TRUE	FALSE	NA	NA	NA	NA	NA	NA	NA	NA	NA	NA	TRUE	FALSE	NA	NA	NA	NA	NA	NA	NA	NA	NA	NA	NA	0	2.60364	2.50954	1.8506	1.25477	2.22712	0.827758	0	0.0989979	0.094905	0.0702811	0.0474525	0.0846395	0.834847
CR43941	FALSE	FALSE	NA	NA	NA	NA	NA	NA	NA	NA	NA	NA	FALSE	FALSE	NA	NA	NA	NA	NA	NA	NA	NA	NA	NA	NA	2.54519	7.10643	2.50954	1.8506	2.52737	4.47852	0.825387	0.130176	0.365657	0.12843	0.0951079	0.129303	0.230382	0.833272
Rab9Db	TRUE	FALSE	NA	NA	NA	NA	NA	NA	NA	NA	NA	NA	TRUE	FALSE	NA	NA	NA	NA	NA	NA	NA	NA	NA	NA	NA	0.424199	0	0.627385	1.8506	0.525792	0.925301	0.815431	0.0372903	0	0.055185	0.163467	0.0462376	0.0817336	0.821862
Clect27	TRUE	FALSE	NA	NA	NA	NA	NA	NA	NA	NA	NA	NA	TRUE	FALSE	NA	NA	NA	NA	NA	NA	NA	NA	NA	NA	NA	0.994904	0	1.47145	4.34035	1.23318	2.17018	0.815431	0.0464055	0	0.0686745	0.203425	0.05754	0.101713	0.821862
CG44102	TRUE	FALSE	NA	NA	NA	NA	NA	NA	NA	NA	NA	NA	TRUE	FALSE	NA	NA	NA	NA	NA	NA	NA	NA	NA	NA	NA	1.61484	3.20845	1.32186	1.94954	1.46835	2.57899	0.812615	0.136376	0.272592	0.1117	0.165437	0.124038	0.219014	0.820246
tinc	TRUE	FALSE	NA	NA	NA	NA	NA	NA	NA	NA	NA	NA	TRUE	FALSE	NA	NA	NA	NA	NA	NA	NA	NA	NA	NA	NA	5.11564	12.243	5.04403	5.57937	5.07983	8.91117	0.810835	0.0441229	0.106234	0.0435314	0.048355	0.0438272	0.0772943	0.818537
mmd	TRUE	FALSE	NA	NA	NA	NA	NA	NA	NA	NA	NA	NA	TRUE	FALSE	NA	NA	NA	NA	NA	NA	NA	NA	NA	NA	NA	3.4691	4.08295	1.28272	4.24577	2.37591	4.16436	0.809616	0.0308539	0.0365324	0.0114152	0.0379438	0.0211346	0.0372381	0.817175
Cyp303a1	TRUE	FALSE	NA	NA	NA	NA	NA	NA	NA	NA	NA	NA	TRUE	FALSE	NA	NA	NA	NA	NA	NA	NA	NA	NA	NA	NA	0.688913	0	0	1.20404	0.344456	0.602019	0.805488	0.0193654	0	0	0.0340091	0.00968272	0.0170046	0.812437
CG12209	TRUE	FALSE	NA	NA	NA	NA	NA	NA	NA	NA	NA	NA	TRUE	FALSE	NA	NA	NA	NA	NA	NA	NA	NA	NA	NA	NA	1.69679	2.03041	0	0.925301	0.848397	1.47786	0.800693	0.093766	0.112878	0	0.0513796	0.046883	0.0821289	0.808826
CG30384	TRUE	FALSE	NA	NA	NA	NA	NA	NA	NA	NA	NA	NA	TRUE	FALSE	NA	NA	NA	NA	NA	NA	NA	NA	NA	NA	NA	1.69679	2.03041	0	0.925301	0.848397	1.47786	0.800693	0.0476631	0.0573783	0	0.0261173	0.0238316	0.0417478	0.808826
CG41056	TRUE	FALSE	NA	NA	NA	NA	NA	NA	NA	NA	NA	NA	TRUE	FALSE	NA	NA	NA	NA	NA	NA	NA	NA	NA	NA	NA	1.69679	2.03041	0	0.925301	0.848397	1.47786	0.800693	0.0484464	0.0583212	0	0.0265465	0.0242232	0.0424338	0.808826
CG7213	TRUE	FALSE	NA	NA	NA	NA	NA	NA	NA	NA	NA	NA	TRUE	FALSE	NA	NA	NA	NA	NA	NA	NA	NA	NA	NA	NA	1.69679	2.03041	0	0.925301	0.848397	1.47786	0.800693	0.0703409	0.0846784	0	0.0385437	0.0351704	0.061611	0.808826
HHEX	TRUE	FALSE	NA	NA	NA	NA	NA	NA	NA	NA	NA	NA	TRUE	FALSE	NA	NA	NA	NA	NA	NA	NA	NA	NA	NA	NA	1.69679	2.03041	0	0.925301	0.848397	1.47786	0.800693	0.0938538	0.112984	0	0.0514277	0.0469269	0.0822058	0.808826
CG32284	TRUE	FALSE	NA	NA	NA	NA	NA	NA	NA	NA	NA	NA	TRUE	FALSE	NA	NA	NA	NA	NA	NA	NA	NA	NA	NA	NA	1.69679	2.03041	0	0.925301	0.848397	1.47786	0.800693	0.388518	0.46771	0	0.212891	0.194259	0.3403	0.808826
CG42561	TRUE	FALSE	NA	NA	NA	NA	NA	NA	NA	NA	NA	NA	TRUE	FALSE	NA	NA	NA	NA	NA	NA	NA	NA	NA	NA	NA	1.69679	2.03041	0	0.925301	0.848397	1.47786	0.800693	0.273125	0.328796	0	0.149661	0.136563	0.239228	0.808826
unc80	TRUE	FALSE	NA	NA	NA	NA	NA	NA	NA	NA	NA	NA	TRUE	FALSE	NA	NA	NA	NA	NA	NA	NA	NA	NA	NA	NA	1.70651	2.02675	0	0.930602	0.853255	1.47868	0.793259	0.0100961	0.012063	0	0.00553222	0.00504803	0.0087976	0.801389
CG34206	TRUE	FALSE	NA	NA	NA	NA	NA	NA	NA	NA	NA	NA	TRUE	FALSE	NA	NA	NA	NA	NA	NA	NA	NA	NA	NA	NA	0.848397	3.04561	2.50954	2.7759	1.67897	2.91076	0.79382	0.0761674	0.275077	0.225437	0.250418	0.150802	0.262748	0.801022
CG13924	TRUE	FALSE	NA	NA	NA	NA	NA	NA	NA	NA	NA	NA	TRUE	FALSE	NA	NA	NA	NA	NA	NA	NA	NA	NA	NA	NA	4.30832	5.99887	1.27439	3.64508	2.79136	4.82197	0.788657	0.200954	0.281493	0.0594774	0.170839	0.130216	0.226166	0.79648
CG44314	TRUE	FALSE	NA	NA	NA	NA	NA	NA	NA	NA	NA	NA	TRUE	FALSE	NA	NA	NA	NA	NA	NA	NA	NA	NA	NA	NA	0.540202	0	0	0.931268	0.270101	0.465634	0.785697	0.0409126	0	0	0.0708707	0.0204563	0.0354353	0.792645
CR43927	FALSE	FALSE	NA	NA	NA	NA	NA	NA	NA	NA	NA	NA	FALSE	FALSE	NA	NA	NA	NA	NA	NA	NA	NA	NA	NA	NA	6.77276	12.967	6.01011	8.86403	6.39144	10.9155	0.77217	1.87578	3.61299	1.66555	2.46682	1.77067	3.03991	0.779734
CG9664	TRUE	FALSE	NA	NA	NA	NA	NA	NA	NA	NA	NA	NA	TRUE	FALSE	NA	NA	NA	NA	NA	NA	NA	NA	NA	NA	NA	5.2016	9.9589	4.61586	6.80772	4.90873	8.38331	0.77217	0.11192	0.215572	0.0993768	0.147185	0.105648	0.181379	0.779734
Abd-B	TRUE	FALSE	NA	NA	NA	NA	NA	NA	NA	NA	NA	NA	TRUE	FALSE	NA	NA	NA	NA	NA	NA	NA	NA	NA	NA	NA	4.03544	8.39793	4.45054	6.08614	4.24299	7.24203	0.771313	0.0739874	0.154899	0.0816469	0.112124	0.0778172	0.133512	0.778806
Rh7	TRUE	FALSE	NA	NA	NA	NA	NA	NA	NA	NA	NA	NA	TRUE	FALSE	NA	NA	NA	NA	NA	NA	NA	NA	NA	NA	NA	0.848397	2.03041	2.50954	3.7012	1.67897	2.86581	0.771366	0.013137	0.0316294	0.0388824	0.057588	0.0260097	0.0446087	0.778277
CG5493	TRUE	FALSE	NA	NA	NA	NA	NA	NA	NA	NA	NA	NA	TRUE	FALSE	NA	NA	NA	NA	NA	NA	NA	NA	NA	NA	NA	1.93031	2.30984	1.27566	3.15793	1.60298	2.73388	0.77019	0.120476	0.145033	0.0796654	0.198047	0.100071	0.17154	0.777521
Irk2	TRUE	FALSE	NA	NA	NA	NA	NA	NA	NA	NA	NA	NA	TRUE	FALSE	NA	NA	NA	NA	NA	NA	NA	NA	NA	NA	NA	6.12746	3.66611	0	6.76043	3.06373	5.21327	0.766898	0.233831	0.140747	0	0.259232	0.116916	0.199989	0.774452
CG14227	TRUE	FALSE	NA	NA	NA	NA	NA	NA	NA	NA	NA	NA	TRUE	FALSE	NA	NA	NA	NA	NA	NA	NA	NA	NA	NA	NA	2.54519	3.04561	2.50954	5.55181	2.52737	4.29871	0.766269	0.198618	0.239103	0.195954	0.435336	0.197286	0.33722	0.773398
CG34269	TRUE	FALSE	NA	NA	NA	NA	NA	NA	NA	NA	NA	NA	TRUE	FALSE	NA	NA	NA	NA	NA	NA	NA	NA	NA	NA	NA	2.54519	3.04561	2.50954	5.55181	2.52737	4.29871	0.766269	0.32615	0.392628	0.321774	0.714862	0.323962	0.553745	0.773398
pdm3	TRUE	FALSE	NA	NA	NA	NA	NA	NA	NA	NA	NA	NA	TRUE	FALSE	NA	NA	NA	NA	NA	NA	NA	NA	NA	NA	NA	2.16191	2.0416	2.52337	5.8947	2.34264	3.96815	0.760331	0.0259207	0.0246258	0.0302727	0.071017	0.0280967	0.0478214	0.767256
vvl	TRUE	FALSE	NA	NA	NA	NA	NA	NA	NA	NA	NA	NA	TRUE	FALSE	NA	NA	NA	NA	NA	NA	NA	NA	NA	NA	NA	5.09344	11.1673	7.5319	10.1784	6.31267	10.6728	0.757621	0.0719653	0.158733	0.106482	0.144505	0.0892237	0.151619	0.764954
CG13359	TRUE	FALSE	NA	NA	NA	NA	NA	NA	NA	NA	NA	NA	TRUE	FALSE	NA	NA	NA	NA	NA	NA	NA	NA	NA	NA	NA	1.69679	4.06082	1.25477	0.925301	1.47578	2.49306	0.756438	0.06253	0.150551	0.0462684	0.0342637	0.0543992	0.0924073	0.764421
CG2269	TRUE	FALSE	NA	NA	NA	NA	NA	NA	NA	NA	NA	NA	TRUE	FALSE	NA	NA	NA	NA	NA	NA	NA	NA	NA	NA	NA	1.84833	4.42348	1.36683	1.00794	1.60758	2.71571	0.756438	0.0315206	0.0758908	0.0233233	0.0172719	0.0274219	0.0465813	0.764421
Dic61B	TRUE	FALSE	NA	NA	NA	NA	NA	NA	NA	NA	NA	NA	TRUE	FALSE	NA	NA	NA	NA	NA	NA	NA	NA	NA	NA	NA	1.70592	1.02067	0	1.86056	0.85296	1.44061	0.75613	0.0414711	0.024962	0	0.0454486	0.0207355	0.0352053	0.763689
CG13042	TRUE	FALSE	NA	NA	NA	NA	NA	NA	NA	NA	NA	NA	TRUE	FALSE	NA	NA	NA	NA	NA	NA	NA	NA	NA	NA	NA	1.69679	1.0152	0	1.8506	0.848397	1.4329	0.75613	0.269454	0.162188	0	0.295298	0.134727	0.228743	0.763689
CG4678	TRUE	FALSE	NA	NA	NA	NA	NA	NA	NA	NA	NA	NA	TRUE	FALSE	NA	NA	NA	NA	NA	NA	NA	NA	NA	NA	NA	2.03938	1.22018	0	2.22425	1.01969	1.72221	0.75613	0.0681412	0.0410152	0	0.0746767	0.0340706	0.0578459	0.763689
SoxN	TRUE	FALSE	NA	NA	NA	NA	NA	NA	NA	NA	NA	NA	TRUE	FALSE	NA	NA	NA	NA	NA	NA	NA	NA	NA	NA	NA	1.69679	1.0152	0	1.8506	0.848397	1.4329	0.75613	0.0261916	0.0157651	0	0.0287037	0.0130958	0.0222344	0.763689
CG33301	TRUE	FALSE	NA	NA	NA	NA	NA	NA	NA	NA	NA	NA	TRUE	FALSE	NA	NA	NA	NA	NA	NA	NA	NA	NA	NA	NA	1.88255	1.12634	0	2.05319	0.941274	1.58977	0.75613	0.0895763	0.0539173	0	0.0981676	0.0447881	0.0760425	0.763689
Odc1	TRUE	FALSE	NA	NA	NA	NA	NA	NA	NA	NA	NA	NA	TRUE	FALSE	NA	NA	NA	NA	NA	NA	NA	NA	NA	NA	NA	0.848397	1.0152	2.50954	4.6265	1.67897	2.82085	0.748557	0.0475502	0.0572423	0.140737	0.260554	0.0941436	0.158898	0.755168
CG13711	TRUE	FALSE	NA	NA	NA	NA	NA	NA	NA	NA	NA	NA	TRUE	FALSE	NA	NA	NA	NA	NA	NA	NA	NA	NA	NA	NA	2.54519	4.06082	3.76431	6.47711	3.15475	5.26896	0.739993	0.2398	0.384904	0.354874	0.613198	0.297337	0.499051	0.747088
[truncated: 14,853 more rows]

## Sheet: raw
target_id	coding.wald	TE.wald	pval.wald	qval.wald	b	se_b	mean_obs.wald	var_obs.wald	tech_var.wald	sigma_sq.wald	smooth_sigma_sq.wald	final_sigma_sq.wald	coding.lrt	TE.lrt	pval.lrt	qval.lrt	test_stat	rss	degrees_free	mean_obs.lrt	var_obs.lrt	tech_var.lrt	sigma_sq.lrt	smooth_sigma_sq.lrt	final_sigma_sq.lrt	shW.1.srpb	shSmt3.1.srpb	shW.2.srpb	shSmt3.2.srpb	ctrl.srpb	kd.srpb	log2FC.srpb	shW.1.tpm	shSmt3.1.tpm	shW.2.tpm	shSmt3.2.tpm	ctrl.tpm	kd.tpm	log2FC.tpm
5-HT1A	TRUE	FALSE	NA	NA	NA	NA	NA	NA	NA	NA	NA	NA	TRUE	FALSE	NA	NA	NA	NA	NA	NA	NA	NA	NA	NA	NA	0	2.03041	0	3.7012	0	2.86581	Inf	0	0.0250345	0	0.0455805	0	0.0353075	Inf
5-HT2B	TRUE	FALSE	NA	NA	NA	NA	NA	NA	NA	NA	NA	NA	TRUE	FALSE	NA	NA	NA	NA	NA	NA	NA	NA	NA	NA	NA	0	0.631399	0	0	0	0.3157	Inf	0	0.00983585	0	0	0	0.00491793	Inf
7B2	TRUE	FALSE	NA	NA	NA	NA	NA	NA	NA	NA	NA	NA	TRUE	FALSE	NA	NA	NA	NA	NA	NA	NA	NA	NA	NA	NA	0	0	0	0.932731	0	0.466366	Inf	0	0	0	0.0588061	0	0.029403	Inf
a10	TRUE	FALSE	NA	NA	NA	NA	NA	NA	NA	NA	NA	NA	TRUE	FALSE	NA	NA	NA	NA	NA	NA	NA	NA	NA	NA	NA	0	0	0	0.925301	0	0.46265	Inf	0	0	0	0.149254	0	0.074627	Inf
Acp53C14a	TRUE	FALSE	NA	NA	NA	NA	NA	NA	NA	NA	NA	NA	TRUE	FALSE	NA	NA	NA	NA	NA	NA	NA	NA	NA	NA	NA	0	1.42492	0	0	0	0.712461	Inf	0	0.21548	0	0	0	0.10774	Inf
Acp54A1	TRUE	FALSE	NA	NA	NA	NA	NA	NA	NA	NA	NA	NA	TRUE	FALSE	NA	NA	NA	NA	NA	NA	NA	NA	NA	NA	NA	0	0	0	0.925301	0	0.46265	Inf	0	0	0	0.503469	0	0.251734	Inf
Acp95EF	TRUE	FALSE	NA	NA	NA	NA	NA	NA	NA	NA	NA	NA	TRUE	FALSE	NA	NA	NA	NA	NA	NA	NA	NA	NA	NA	NA	0	1.0152	0	0	0	0.507602	Inf	0	0.990618	0	0	0	0.495309	Inf
ACXB	TRUE	FALSE	NA	NA	NA	NA	NA	NA	NA	NA	NA	NA	TRUE	FALSE	NA	NA	NA	NA	NA	NA	NA	NA	NA	NA	NA	0	1.0152	0	0.925301	0	0.970253	Inf	0	0.017967	0	0.0163563	0	0.0171617	Inf
ACXC	TRUE	FALSE	NA	NA	NA	NA	NA	NA	NA	NA	NA	NA	TRUE	FALSE	NA	NA	NA	NA	NA	NA	NA	NA	NA	NA	NA	0	1.02426	0	0.933557	0	0.978911	Inf	0	0.0182496	0	0.0166136	0	0.0174316	Inf
ACXE	TRUE	FALSE	NA	NA	NA	NA	NA	NA	NA	NA	NA	NA	TRUE	FALSE	NA	NA	NA	NA	NA	NA	NA	NA	NA	NA	NA	0	1.0152	0	1.8506	0	1.4329	Inf	0	0.0185698	0	0.0338102	0	0.02619	Inf
Adgf-B	TRUE	FALSE	NA	NA	NA	NA	NA	NA	NA	NA	NA	NA	TRUE	FALSE	NA	NA	NA	NA	NA	NA	NA	NA	NA	NA	NA	0	1.0152	0	0	0	0.507602	Inf	0	0.0403567	0	0	0	0.0201784	Inf
Ag5r	TRUE	FALSE	NA	NA	NA	NA	NA	NA	NA	NA	NA	NA	TRUE	FALSE	NA	NA	NA	NA	NA	NA	NA	NA	NA	NA	NA	0	2.03041	0	100.891	0	51.4608	Inf	0	0.0967656	0	4.80255	0	2.44966	Inf
Ag5r2	TRUE	FALSE	NA	NA	NA	NA	NA	NA	NA	NA	NA	NA	TRUE	FALSE	NA	NA	NA	NA	NA	NA	NA	NA	NA	NA	NA	0	0	0	2.7759	0	1.38795	Inf	0	0	0	0.2535	0	0.12675	Inf
alpha-Est6	TRUE	FALSE	NA	NA	NA	NA	NA	NA	NA	NA	NA	NA	TRUE	FALSE	NA	NA	NA	NA	NA	NA	NA	NA	NA	NA	NA	0	0	0	0.925301	0	0.46265	Inf	0	0	0	0.033552	0	0.016776	Inf
ALUII_DM|Drosophila_fruit_fly_genus	FALSE	TRUE	NA	NA	NA	NA	NA	NA	NA	NA	NA	NA	FALSE	TRUE	NA	NA	NA	NA	NA	NA	NA	NA	NA	NA	NA	0	0	0	0.925301	0	0.46265	Inf	0	0	0	0.928456	0	0.464228	Inf
Amnionless	TRUE	FALSE	NA	NA	NA	NA	NA	NA	NA	NA	NA	NA	TRUE	FALSE	NA	NA	NA	NA	NA	NA	NA	NA	NA	NA	NA	0	1.08782	0	0	0	0.543909	Inf	0	0.0407107	0	0	0	0.0203554	Inf
Amyrel	TRUE	FALSE	NA	NA	NA	NA	NA	NA	NA	NA	NA	NA	TRUE	FALSE	NA	NA	NA	NA	NA	NA	NA	NA	NA	NA	NA	0	1.0152	0	0	0	0.507602	Inf	0	0.0446914	0	0	0	0.0223457	Inf
Ance-2	TRUE	FALSE	NA	NA	NA	NA	NA	NA	NA	NA	NA	NA	TRUE	FALSE	NA	NA	NA	NA	NA	NA	NA	NA	NA	NA	NA	0	1.0152	0	0	0	0.507602	Inf	0	0.0298237	0	0	0	0.0149118	Inf
Ance-3	TRUE	FALSE	NA	NA	NA	NA	NA	NA	NA	NA	NA	NA	TRUE	FALSE	NA	NA	NA	NA	NA	NA	NA	NA	NA	NA	NA	0	1.0964	0	0	0	0.5482	Inf	0	0.021687	0	0	0	0.0108435	Inf
Aplip1	TRUE	FALSE	NA	NA	NA	NA	NA	NA	NA	NA	NA	NA	TRUE	FALSE	NA	NA	NA	NA	NA	NA	NA	NA	NA	NA	NA	0	1.02007	0	0	0	0.510035	Inf	0	0.0275369	0	0	0	0.0137684	Inf
AQP	TRUE	FALSE	NA	NA	NA	NA	NA	NA	NA	NA	NA	NA	TRUE	FALSE	NA	NA	NA	NA	NA	NA	NA	NA	NA	NA	NA	0	1.01166	0	0	0	0.505829	Inf	0	0.060213	0	0	0	0.0301065	Inf
Arp53D	TRUE	FALSE	NA	NA	NA	NA	NA	NA	NA	NA	NA	NA	TRUE	FALSE	NA	NA	NA	NA	NA	NA	NA	NA	NA	NA	NA	0	2.03041	0	0	0	1.0152	Inf	0	0.102347	0	0	0	0.0511734	Inf
Arr2	TRUE	FALSE	NA	NA	NA	NA	NA	NA	NA	NA	NA	NA	TRUE	FALSE	NA	NA	NA	NA	NA	NA	NA	NA	NA	NA	NA	0	1.0152	0	0	0	0.507602	Inf	0	0.0447577	0	0	0	0.0223788	Inf
ARS406_DM|Drosophila_fruit_fly_genus	FALSE	TRUE	NA	NA	NA	NA	NA	NA	NA	NA	NA	NA	FALSE	TRUE	NA	NA	NA	NA	NA	NA	NA	NA	NA	NA	NA	0	2.03041	0	1.8506	0	1.94051	Inf	0	0.782668	0	0.712505	0	0.747586	Inf
AstC	TRUE	FALSE	NA	NA	NA	NA	NA	NA	NA	NA	NA	NA	TRUE	FALSE	NA	NA	NA	NA	NA	NA	NA	NA	NA	NA	NA	0	0	0	1.85323	0	0.926616	Inf	0	0	0	0.109841	0	0.0549205	Inf
b6	TRUE	FALSE	NA	NA	NA	NA	NA	NA	NA	NA	NA	NA	TRUE	FALSE	NA	NA	NA	NA	NA	NA	NA	NA	NA	NA	NA	0	0	0	0.925301	0	0.46265	Inf	0	0	0	0.0283117	0	0.0141558	Inf
Bace	TRUE	FALSE	NA	NA	NA	NA	NA	NA	NA	NA	NA	NA	TRUE	FALSE	NA	NA	NA	NA	NA	NA	NA	NA	NA	NA	NA	0	0	0	924.254	0	462.127	Inf	0	0	0	49.4927	0	24.7464	Inf
BBS1	TRUE	FALSE	NA	NA	NA	NA	NA	NA	NA	NA	NA	NA	TRUE	FALSE	NA	NA	NA	NA	NA	NA	NA	NA	NA	NA	NA	0	0	0	1.8506	0	0.925301	Inf	0	0	0	0.058743	0	0.0293715	Inf
beat-IIa	TRUE	FALSE	NA	NA	NA	NA	NA	NA	NA	NA	NA	NA	TRUE	FALSE	NA	NA	NA	NA	NA	NA	NA	NA	NA	NA	NA	0	1.04512	0	0	0	0.52256	Inf	0	0.0229404	0	0	0	0.0114702	Inf
beat-IV	TRUE	FALSE	NA	NA	NA	NA	NA	NA	NA	NA	NA	NA	TRUE	FALSE	NA	NA	NA	NA	NA	NA	NA	NA	NA	NA	NA	0	6.6139	0	0	0	3.30695	Inf	0	0.137747	0	0	0	0.0688735	Inf
beat-Vc	TRUE	FALSE	NA	NA	NA	NA	NA	NA	NA	NA	NA	NA	TRUE	FALSE	NA	NA	NA	NA	NA	NA	NA	NA	NA	NA	NA	0	0	0	0.925301	0	0.46265	Inf	0	0	0	0.0270565	0	0.0135282	Inf
betaNACtes3	TRUE	FALSE	NA	NA	NA	NA	NA	NA	NA	NA	NA	NA	TRUE	FALSE	NA	NA	NA	NA	NA	NA	NA	NA	NA	NA	NA	0	0.507602	0	0	0	0.253801	Inf	0	0.0392797	0	0	0	0.0196398	Inf
betaNACtes6	TRUE	FALSE	NA	NA	NA	NA	NA	NA	NA	NA	NA	NA	TRUE	FALSE	NA	NA	NA	NA	NA	NA	NA	NA	NA	NA	NA	0	0.507602	0	0	0	0.253801	Inf	0	0.0392797	0	0	0	0.0196398	Inf
betaTry	TRUE	FALSE	NA	NA	NA	NA	NA	NA	NA	NA	NA	NA	TRUE	FALSE	NA	NA	NA	NA	NA	NA	NA	NA	NA	NA	NA	0	0	0	440.584	0	220.292	Inf	0	0	0	35.1987	0	17.5994	Inf
boss	TRUE	FALSE	NA	NA	NA	NA	NA	NA	NA	NA	NA	NA	TRUE	FALSE	NA	NA	NA	NA	NA	NA	NA	NA	NA	NA	NA	0	0	0	0.925301	0	0.46265	Inf	0	0	0	0.0195183	0	0.00975917	Inf
Brd	TRUE	FALSE	NA	NA	NA	NA	NA	NA	NA	NA	NA	NA	TRUE	FALSE	NA	NA	NA	NA	NA	NA	NA	NA	NA	NA	NA	0	3.04561	0	3.7012	0	3.37341	Inf	0	0.543552	0	0.659766	0	0.601659	Inf
Bro	TRUE	FALSE	NA	NA	NA	NA	NA	NA	NA	NA	NA	NA	TRUE	FALSE	NA	NA	NA	NA	NA	NA	NA	NA	NA	NA	NA	0	1.0152	0	0.925301	0	0.970253	Inf	0	0.110704	0	0.10078	0	0.105742	Inf
brv2	TRUE	FALSE	NA	NA	NA	NA	NA	NA	NA	NA	NA	NA	TRUE	FALSE	NA	NA	NA	NA	NA	NA	NA	NA	NA	NA	NA	0	1.03114	0	0.939828	0	0.985485	Inf	0	0.0287028	0	0.0261297	0	0.0274162	Inf
CadN2	TRUE	FALSE	NA	NA	NA	NA	NA	NA	NA	NA	NA	NA	TRUE	FALSE	NA	NA	NA	NA	NA	NA	NA	NA	NA	NA	NA	0	3.19614	0	3.53473	0	3.36544	Inf	0	0.0257797	0	0.0284767	0	0.0271282	Inf
CanB	TRUE	FALSE	NA	NA	NA	NA	NA	NA	NA	NA	NA	NA	TRUE	FALSE	NA	NA	NA	NA	NA	NA	NA	NA	NA	NA	NA	0	0	0	0.957477	0	0.478738	Inf	0	0	0	0.0578766	0	0.0289383	Inf
CapaR	TRUE	FALSE	NA	NA	NA	NA	NA	NA	NA	NA	NA	NA	TRUE	FALSE	NA	NA	NA	NA	NA	NA	NA	NA	NA	NA	NA	0	3.0501	0	0	0	1.52505	Inf	0	0.111514	0	0	0	0.0557572	Inf
caup	TRUE	FALSE	NA	NA	NA	NA	NA	NA	NA	NA	NA	NA	TRUE	FALSE	NA	NA	NA	NA	NA	NA	NA	NA	NA	NA	NA	0	1.0152	0	0	0	0.507602	Inf	0	0.0146511	0	0	0	0.00732554	Inf
Cby	TRUE	FALSE	NA	NA	NA	NA	NA	NA	NA	NA	NA	NA	TRUE	FALSE	NA	NA	NA	NA	NA	NA	NA	NA	NA	NA	NA	0	6.53734	0	4.53752	0	5.53743	Inf	0	1.1427	0	0.792192	0	0.967446	Inf
Ccp84Aa	TRUE	FALSE	NA	NA	NA	NA	NA	NA	NA	NA	NA	NA	TRUE	FALSE	NA	NA	NA	NA	NA	NA	NA	NA	NA	NA	NA	0	0	0	2.7759	0	1.38795	Inf	0	0	0	0.291122	0	0.145561	Inf
Ccp84Ab	TRUE	FALSE	NA	NA	NA	NA	NA	NA	NA	NA	NA	NA	TRUE	FALSE	NA	NA	NA	NA	NA	NA	NA	NA	NA	NA	NA	0	2.03041	0	0	0	1.0152	Inf	0	0.190027	0	0	0	0.0950137	Inf
CecB	TRUE	FALSE	NA	NA	NA	NA	NA	NA	NA	NA	NA	NA	TRUE	FALSE	NA	NA	NA	NA	NA	NA	NA	NA	NA	NA	NA	0	0	0	0.925301	0	0.46265	Inf	0	0	0	0.243035	0	0.121517	Inf
CecC	TRUE	FALSE	NA	NA	NA	NA	NA	NA	NA	NA	NA	NA	TRUE	FALSE	NA	NA	NA	NA	NA	NA	NA	NA	NA	NA	NA	0	1.0152	0	1.8506	0	1.4329	Inf	0	0.322615	0	0.587388	0	0.455002	Inf
CG10029	TRUE	FALSE	NA	NA	NA	NA	NA	NA	NA	NA	NA	NA	TRUE	FALSE	NA	NA	NA	NA	NA	NA	NA	NA	NA	NA	NA	0	0	0	1.03695	0	0.518474	Inf	0	0	0	0.046507	0	0.0232535	Inf
CG10041	TRUE	FALSE	NA	NA	NA	NA	NA	NA	NA	NA	NA	NA	TRUE	FALSE	NA	NA	NA	NA	NA	NA	NA	NA	NA	NA	NA	0	3.04561	0	3.7012	0	3.37341	Inf	0	0.240373	0	0.291766	0	0.266069	Inf
CG10051	TRUE	FALSE	NA	NA	NA	NA	NA	NA	NA	NA	NA	NA	TRUE	FALSE	NA	NA	NA	NA	NA	NA	NA	NA	NA	NA	NA	0	1.0152	0	0	0	0.507602	Inf	0	0.0234851	0	0	0	0.0117425	Inf
CG10086	TRUE	FALSE	NA	NA	NA	NA	NA	NA	NA	NA	NA	NA	TRUE	FALSE	NA	NA	NA	NA	NA	NA	NA	NA	NA	NA	NA	0	2.03041	0	12.0289	0	7.02966	Inf	0	0.0724724	0	0.428841	0	0.250657	Inf
CG10104	TRUE	FALSE	NA	NA	NA	NA	NA	NA	NA	NA	NA	NA	TRUE	FALSE	NA	NA	NA	NA	NA	NA	NA	NA	NA	NA	NA	0	0	0	0.925301	0	0.46265	Inf	0	0	0	0.0417679	0	0.0208839	Inf
CG10131	TRUE	FALSE	NA	NA	NA	NA	NA	NA	NA	NA	NA	NA	TRUE	FALSE	NA	NA	NA	NA	NA	NA	NA	NA	NA	NA	NA	0	0	0	0.925301	0	0.46265	Inf	0	0	0	0.0639405	0	0.0319703	Inf
CG10168	TRUE	FALSE	NA	NA	NA	NA	NA	NA	NA	NA	NA	NA	TRUE	FALSE	NA	NA	NA	NA	NA	NA	NA	NA	NA	NA	NA	0	0	0	1.8506	0	0.925301	Inf	0	0	0	0.0662941	0	0.0331471	Inf
CG10170	TRUE	FALSE	NA	NA	NA	NA	NA	NA	NA	NA	NA	NA	TRUE	FALSE	NA	NA	NA	NA	NA	NA	NA	NA	NA	NA	NA	0	1.0152	0	9.25301	0	5.13411	Inf	0	0.0385516	0	0.350957	0	0.194754	Inf
CG10185	TRUE	FALSE	NA	NA	NA	NA	NA	NA	NA	NA	NA	NA	TRUE	FALSE	NA	NA	NA	NA	NA	NA	NA	NA	NA	NA	NA	0	3.04561	0	2.7759	0	2.91076	Inf	0	0.034942	0	0.0318096	0	0.0333758	Inf
CG10232	TRUE	FALSE	NA	NA	NA	NA	NA	NA	NA	NA	NA	NA	TRUE	FALSE	NA	NA	NA	NA	NA	NA	NA	NA	NA	NA	NA	0	3.04561	0	0.925301	0	1.98546	Inf	0	0.108709	0	0.0329878	0	0.0708482	Inf
CG10257	TRUE	FALSE	NA	NA	NA	NA	NA	NA	NA	NA	NA	NA	TRUE	FALSE	NA	NA	NA	NA	NA	NA	NA	NA	NA	NA	NA	0	0	0	0.925301	0	0.46265	Inf	0	0	0	0.0466255	0	0.0233127	Inf
CG10300	TRUE	FALSE	NA	NA	NA	NA	NA	NA	NA	NA	NA	NA	TRUE	FALSE	NA	NA	NA	NA	NA	NA	NA	NA	NA	NA	NA	0	0	0	0.925301	0	0.46265	Inf	0	0	0	0.042743	0	0.0213715	Inf
CG10352	TRUE	FALSE	NA	NA	NA	NA	NA	NA	NA	NA	NA	NA	TRUE	FALSE	NA	NA	NA	NA	NA	NA	NA	NA	NA	NA	NA	0	1.0152	0	1.8506	0	1.4329	Inf	0	0.0466977	0	0.0850228	0	0.0658602	Inf
CG10362	TRUE	FALSE	NA	NA	NA	NA	NA	NA	NA	NA	NA	NA	TRUE	FALSE	NA	NA	NA	NA	NA	NA	NA	NA	NA	NA	NA	0	3.04561	0	2.7759	0	2.91076	Inf	0	0.0506009	0	0.0460648	0	0.0483329	Inf
CG10472	TRUE	FALSE	NA	NA	NA	NA	NA	NA	NA	NA	NA	NA	TRUE	FALSE	NA	NA	NA	NA	NA	NA	NA	NA	NA	NA	NA	0	1.0152	0	0.925301	0	0.970253	Inf	0	0.0818638	0	0.0745251	0	0.0781944	Inf
CG10474	TRUE	FALSE	NA	NA	NA	NA	NA	NA	NA	NA	NA	NA	TRUE	FALSE	NA	NA	NA	NA	NA	NA	NA	NA	NA	NA	NA	0	0	0	0.925301	0	0.46265	Inf	0	0	0	0.0511404	0	0.0255702	Inf
CG10477	TRUE	FALSE	NA	NA	NA	NA	NA	NA	NA	NA	NA	NA	TRUE	FALSE	NA	NA	NA	NA	NA	NA	NA	NA	NA	NA	NA	0	0	0	3.7012	0	1.8506	Inf	0	0	0	0.18907	0	0.0945349	Inf
CG10589	TRUE	FALSE	NA	NA	NA	NA	NA	NA	NA	NA	NA	NA	TRUE	FALSE	NA	NA	NA	NA	NA	NA	NA	NA	NA	NA	NA	0	1.0152	0	0	0	0.507602	Inf	0	0.0517439	0	0	0	0.025872	Inf
CG10657	TRUE	FALSE	NA	NA	NA	NA	NA	NA	NA	NA	NA	NA	TRUE	FALSE	NA	NA	NA	NA	NA	NA	NA	NA	NA	NA	NA	0	3.04561	0	1.8506	0	2.44811	Inf	0	0.136604	0	0.0829053	0	0.109755	Inf
CG10659	TRUE	FALSE	NA	NA	NA	NA	NA	NA	NA	NA	NA	NA	TRUE	FALSE	NA	NA	NA	NA	NA	NA	NA	NA	NA	NA	NA	0	0	0	12.0289	0	6.01446	Inf	0	0	0	1.11916	0	0.559581	Inf
CG10694	TRUE	FALSE	NA	NA	NA	NA	NA	NA	NA	NA	NA	NA	TRUE	FALSE	NA	NA	NA	NA	NA	NA	NA	NA	NA	NA	NA	0	2.03041	0	0.925301	0	1.47786	Inf	0	0.156914	0	0.0714239	0	0.114169	Inf
CG10804	TRUE	FALSE	NA	NA	NA	NA	NA	NA	NA	NA	NA	NA	TRUE	FALSE	NA	NA	NA	NA	NA	NA	NA	NA	NA	NA	NA	0	7.36515	0	0.958987	0	4.16207	Inf	0	0.107518	0	0.0139828	0	0.0607506	Inf
CG10841	TRUE	FALSE	NA	NA	NA	NA	NA	NA	NA	NA	NA	NA	TRUE	FALSE	NA	NA	NA	NA	NA	NA	NA	NA	NA	NA	NA	0	3.04704	0	0	0	1.52352	Inf	0	0.0821058	0	0	0	0.0410529	Inf
CG10910	TRUE	FALSE	NA	NA	NA	NA	NA	NA	NA	NA	NA	NA	TRUE	FALSE	NA	NA	NA	NA	NA	NA	NA	NA	NA	NA	NA	0	0	0	30.5349	0	15.2675	Inf	0	0	0	1.01145	0	0.505724	Inf
CG10911	TRUE	FALSE	NA	NA	NA	NA	NA	NA	NA	NA	NA	NA	TRUE	FALSE	NA	NA	NA	NA	NA	NA	NA	NA	NA	NA	NA	0	0	0	110.111	0	55.0554	Inf	0	0	0	6.39536	0	3.19768	Inf
CG10912	TRUE	FALSE	NA	NA	NA	NA	NA	NA	NA	NA	NA	NA	TRUE	FALSE	NA	NA	NA	NA	NA	NA	NA	NA	NA	NA	NA	0	0	0	17.5807	0	8.79036	Inf	0	0	0	1.46776	0	0.733878	Inf
CG10943	TRUE	FALSE	NA	NA	NA	NA	NA	NA	NA	NA	NA	NA	TRUE	FALSE	NA	NA	NA	NA	NA	NA	NA	NA	NA	NA	NA	0	0	0	3.7012	0	1.8506	Inf	0	0	0	0.231019	0	0.11551	Inf
CG11068	TRUE	FALSE	NA	NA	NA	NA	NA	NA	NA	NA	NA	NA	TRUE	FALSE	NA	NA	NA	NA	NA	NA	NA	NA	NA	NA	NA	0	1.0152	0	1.8506	0	1.4329	Inf	0	0.0563337	0	0.102567	0	0.0794505	Inf
CG11085	TRUE	FALSE	NA	NA	NA	NA	NA	NA	NA	NA	NA	NA	TRUE	FALSE	NA	NA	NA	NA	NA	NA	NA	NA	NA	NA	NA	0	0	0	0.925301	0	0.46265	Inf	0	0	0	0.0408362	0	0.0204181	Inf
CG11149	TRUE	FALSE	NA	NA	NA	NA	NA	NA	NA	NA	NA	NA	TRUE	FALSE	NA	NA	NA	NA	NA	NA	NA	NA	NA	NA	NA	0	0	0	2.86413	0	1.43207	Inf	0	0	0	0.096983	0	0.0484915	Inf
CG11227	TRUE	FALSE	NA	NA	NA	NA	NA	NA	NA	NA	NA	NA	TRUE	FALSE	NA	NA	NA	NA	NA	NA	NA	NA	NA	NA	NA	0	1.05275	0	0	0	0.526377	Inf	0	0.0272139	0	0	0	0.013607	Inf
CG11236	TRUE	FALSE	NA	NA	NA	NA	NA	NA	NA	NA	NA	NA	TRUE	FALSE	NA	NA	NA	NA	NA	NA	NA	NA	NA	NA	NA	0	2.0398	0	4.6479	0	3.34385	Inf	0	0.124015	0	0.282245	0	0.20313	Inf
CG1126	TRUE	FALSE	NA	NA	NA	NA	NA	NA	NA	NA	NA	NA	TRUE	FALSE	NA	NA	NA	NA	NA	NA	NA	NA	NA	NA	NA	0	0	0	0.925301	0	0.46265	Inf	0	0	0	0.0533769	0	0.0266884	Inf
CG11318	TRUE	FALSE	NA	NA	NA	NA	NA	NA	NA	NA	NA	NA	TRUE	FALSE	NA	NA	NA	NA	NA	NA	NA	NA	NA	NA	NA	0	0	0	0.925301	0	0.46265	Inf	0	0	0	0.0214131	0	0.0107066	Inf
CG11322	TRUE	FALSE	NA	NA	NA	NA	NA	NA	NA	NA	NA	NA	TRUE	FALSE	NA	NA	NA	NA	NA	NA	NA	NA	NA	NA	NA	0	1.0152	0	0	0	0.507602	Inf	0	0.038527	0	0	0	0.0192635	Inf
CG11356	TRUE	FALSE	NA	NA	NA	NA	NA	NA	NA	NA	NA	NA	TRUE	FALSE	NA	NA	NA	NA	NA	NA	NA	NA	NA	NA	NA	0	1.0152	0	0.925301	0	0.970253	Inf	0	0.104384	0	0.0950261	0	0.0997049	Inf
CG11369	TRUE	FALSE	NA	NA	NA	NA	NA	NA	NA	NA	NA	NA	TRUE	FALSE	NA	NA	NA	NA	NA	NA	NA	NA	NA	NA	NA	0	1.0152	0	0	0	0.507602	Inf	0	0.0264736	0	0	0	0.0132368	Inf
CG11370	TRUE	FALSE	NA	NA	NA	NA	NA	NA	NA	NA	NA	NA	TRUE	FALSE	NA	NA	NA	NA	NA	NA	NA	NA	NA	NA	NA	0	4.08828	0	0	0	2.04414	Inf	0	0.217614	0	0	0	0.108807	Inf
CG11384	TRUE	FALSE	NA	NA	NA	NA	NA	NA	NA	NA	NA	NA	TRUE	FALSE	NA	NA	NA	NA	NA	NA	NA	NA	NA	NA	NA	0	2.03041	0	1.8506	0	1.94051	Inf	0	0.0615646	0	0.0560456	0	0.0588051	Inf
CG11406	TRUE	FALSE	NA	NA	NA	NA	NA	NA	NA	NA	NA	NA	TRUE	FALSE	NA	NA	NA	NA	NA	NA	NA	NA	NA	NA	NA	0	0.656367	0	1.19648	0	0.926425	Inf	0	0.0142598	0	0.0259629	0	0.0201114	Inf
CG11453	TRUE	FALSE	NA	NA	NA	NA	NA	NA	NA	NA	NA	NA	TRUE	FALSE	NA	NA	NA	NA	NA	NA	NA	NA	NA	NA	NA	0	2.03041	0	3.7012	0	2.86581	Inf	0	0.0739379	0	0.134619	0	0.104279	Inf
CG11470	TRUE	FALSE	NA	NA	NA	NA	NA	NA	NA	NA	NA	NA	TRUE	FALSE	NA	NA	NA	NA	NA	NA	NA	NA	NA	NA	NA	0	3.16963	0	0	0	1.58482	Inf	0	0.342806	0	0	0	0.171403	Inf
CG11581	TRUE	FALSE	NA	NA	NA	NA	NA	NA	NA	NA	NA	NA	TRUE	FALSE	NA	NA	NA	NA	NA	NA	NA	NA	NA	NA	NA	0	0.848665	0	0	0	0.424332	Inf	0	0.0451935	0	0	0	0.0225968	Inf
CG11588	TRUE	FALSE	NA	NA	NA	NA	NA	NA	NA	NA	NA	NA	TRUE	FALSE	NA	NA	NA	NA	NA	NA	NA	NA	NA	NA	NA	0	1.08847	0	0	0	0.544234	Inf	0	0.0777494	0	0	0	0.0388747	Inf
CG11600	TRUE	FALSE	NA	NA	NA	NA	NA	NA	NA	NA	NA	NA	TRUE	FALSE	NA	NA	NA	NA	NA	NA	NA	NA	NA	NA	NA	0	0	0	0.925301	0	0.46265	Inf	0	0	0	0.048563	0	0.0242815	Inf
CG11629	TRUE	FALSE	NA	NA	NA	NA	NA	NA	NA	NA	NA	NA	TRUE	FALSE	NA	NA	NA	NA	NA	NA	NA	NA	NA	NA	NA	0	2.03041	0	1.8506	0	1.94051	Inf	0	0.0846784	0	0.0770873	0	0.0808829	Inf
CG11635	TRUE	FALSE	NA	NA	NA	NA	NA	NA	NA	NA	NA	NA	TRUE	FALSE	NA	NA	NA	NA	NA	NA	NA	NA	NA	NA	NA	0	1.0152	0	0	0	0.507602	Inf	0	0.081975	0	0	0	0.0409875	Inf
CG11668	TRUE	FALSE	NA	NA	NA	NA	NA	NA	NA	NA	NA	NA	TRUE	FALSE	NA	NA	NA	NA	NA	NA	NA	NA	NA	NA	NA	0	1.0152	0	0.925301	0	0.970253	Inf	0	0.0524638	0	0.0477607	0	0.0501123	Inf
CG11703	TRUE	FALSE	NA	NA	NA	NA	NA	NA	NA	NA	NA	NA	TRUE	FALSE	NA	NA	NA	NA	NA	NA	NA	NA	NA	NA	NA	0	0	0	0.925301	0	0.46265	Inf	0	0	0	0.0509034	0	0.0254517	Inf
CG11741	TRUE	FALSE	NA	NA	NA	NA	NA	NA	NA	NA	NA	NA	TRUE	FALSE	NA	NA	NA	NA	NA	NA	NA	NA	NA	NA	NA	0	0	0	1.21633	0	0.608167	Inf	0	0	0	0.34952	0	0.17476	Inf
CG11756	TRUE	FALSE	NA	NA	NA	NA	NA	NA	NA	NA	NA	NA	TRUE	FALSE	NA	NA	NA	NA	NA	NA	NA	NA	NA	NA	NA	0	2.03041	0	2.7759	0	2.40316	Inf	0	0.220599	0	0.301235	0	0.260917	Inf
CG11762	TRUE	FALSE	NA	NA	NA	NA	NA	NA	NA	NA	NA	NA	TRUE	FALSE	NA	NA	NA	NA	NA	NA	NA	NA	NA	NA	NA	0	3.04561	0	7.40241	0	5.22401	Inf	0	0.192145	0	0.466453	0	0.329299	Inf
CG11796	TRUE	FALSE	NA	NA	NA	NA	NA	NA	NA	NA	NA	NA	TRUE	FALSE	NA	NA	NA	NA	NA	NA	NA	NA	NA	NA	NA	0	0	0	2.03281	0	1.0164	Inf	0	0	0	0.099682	0	0.049841	Inf
CG11828	TRUE	FALSE	NA	NA	NA	NA	NA	NA	NA	NA	NA	NA	TRUE	FALSE	NA	NA	NA	NA	NA	NA	NA	NA	NA	NA	NA	0	0	0	0.925301	0	0.46265	Inf	0	0	0	0.0404751	0	0.0202376	Inf
CG11854	TRUE	FALSE	NA	NA	NA	NA	NA	NA	NA	NA	NA	NA	TRUE	FALSE	NA	NA	NA	NA	NA	NA	NA	NA	NA	NA	NA	0	1.0152	0	0	0	0.507602	Inf	0	0.0718256	0	0	0	0.0359128	Inf
CG11891	TRUE	FALSE	NA	NA	NA	NA	NA	NA	NA	NA	NA	NA	TRUE	FALSE	NA	NA	NA	NA	NA	NA	NA	NA	NA	NA	NA	0	0	0	14.1269	0	7.06345	Inf	0	0	0	0.434372	0	0.217186	Inf
CG11898	TRUE	FALSE	NA	NA	NA	NA	NA	NA	NA	NA	NA	NA	TRUE	FALSE	NA	NA	NA	NA	NA	NA	NA	NA	NA	NA	NA	0	1.0152	0	0.925301	0	0.970253	Inf	0	0.0141196	0	0.0128539	0	0.0134867	Inf
CG11929	TRUE	FALSE	NA	NA	NA	NA	NA	NA	NA	NA	NA	NA	TRUE	FALSE	NA	NA	NA	NA	NA	NA	NA	NA	NA	NA	NA	0	1.01551	0	0	0	0.507757	Inf	0	0.0212993	0	0	0	0.0106497	Inf
CG12003	TRUE	FALSE	NA	NA	NA	NA	NA	NA	NA	NA	NA	NA	TRUE	FALSE	NA	NA	NA	NA	NA	NA	NA	NA	NA	NA	NA	0	1.0152	0	0	0	0.507602	Inf	0	0.0375207	0	0	0	0.0187604	Inf
CG12011	TRUE	FALSE	NA	NA	NA	NA	NA	NA	NA	NA	NA	NA	TRUE	FALSE	NA	NA	NA	NA	NA	NA	NA	NA	NA	NA	NA	0	0	0	0.925301	0	0.46265	Inf	0	0	0	0.0360162	0	0.0180081	Inf
CG12027	TRUE	FALSE	NA	NA	NA	NA	NA	NA	NA	NA	NA	NA	TRUE	FALSE	NA	NA	NA	NA	NA	NA	NA	NA	NA	NA	NA	0	1.0152	0	0	0	0.507602	Inf	0	0.138381	0	0	0	0.0691903	Inf
CG12133	TRUE	FALSE	NA	NA	NA	NA	NA	NA	NA	NA	NA	NA	TRUE	FALSE	NA	NA	NA	NA	NA	NA	NA	NA	NA	NA	NA	0	0	0	0.925301	0	0.46265	Inf	0	0	0	0.0613686	0	0.0306843	Inf
CG12256	TRUE	FALSE	NA	NA	NA	NA	NA	NA	NA	NA	NA	NA	TRUE	FALSE	NA	NA	NA	NA	NA	NA	NA	NA	NA	NA	NA	0	0	0	0.925301	0	0.46265	Inf	0	0	0	0.0746263	0	0.0373132	Inf
CG12362	TRUE	FALSE	NA	NA	NA	NA	NA	NA	NA	NA	NA	NA	TRUE	FALSE	NA	NA	NA	NA	NA	NA	NA	NA	NA	NA	NA	0	1.03314	0	0	0	0.516571	Inf	0	0.035532	0	0	0	0.017766	Inf
CG12477	TRUE	FALSE	NA	NA	NA	NA	NA	NA	NA	NA	NA	NA	TRUE	FALSE	NA	NA	NA	NA	NA	NA	NA	NA	NA	NA	NA	0	2.03041	0	0	0	1.0152	Inf	0	0.107164	0	0	0	0.0535821	Inf
CG12490	TRUE	FALSE	NA	NA	NA	NA	NA	NA	NA	NA	NA	NA	TRUE	FALSE	NA	NA	NA	NA	NA	NA	NA	NA	NA	NA	NA	0	1.0152	0	0	0	0.507602	Inf	0	0.0416667	0	0	0	0.0208333	Inf
CG12540	TRUE	FALSE	NA	NA	NA	NA	NA	NA	NA	NA	NA	NA	TRUE	FALSE	NA	NA	NA	NA	NA	NA	NA	NA	NA	NA	NA	0	2.03041	0	0	0	1.0152	Inf	0	0.210589	0	0	0	0.105294	Inf
CG12589	TRUE	FALSE	NA	NA	NA	NA	NA	NA	NA	NA	NA	NA	TRUE	FALSE	NA	NA	NA	NA	NA	NA	NA	NA	NA	NA	NA	0	0	0	0.364385	0	0.182193	Inf	0	0	0	0.0680182	0	0.0340091	Inf
CG12605	TRUE	FALSE	NA	NA	NA	NA	NA	NA	NA	NA	NA	NA	TRUE	FALSE	NA	NA	NA	NA	NA	NA	NA	NA	NA	NA	NA	0	2.03041	0	2.7759	0	2.40316	Inf	0	0.0408762	0	0.0558177	0	0.0483469	Inf
CG12645	TRUE	FALSE	NA	NA	NA	NA	NA	NA	NA	NA	NA	NA	TRUE	FALSE	NA	NA	NA	NA	NA	NA	NA	NA	NA	NA	NA	0	1.022	0	0	0	0.511002	Inf	0	0.0673365	0	0	0	0.0336682	Inf
CG12692	TRUE	FALSE	NA	NA	NA	NA	NA	NA	NA	NA	NA	NA	TRUE	FALSE	NA	NA	NA	NA	NA	NA	NA	NA	NA	NA	NA	0	1.02558	0	0	0	0.512791	Inf	0	0.0352414	0	0	0	0.0176207	Inf
CG12725	TRUE	FALSE	NA	NA	NA	NA	NA	NA	NA	NA	NA	NA	TRUE	FALSE	NA	NA	NA	NA	NA	NA	NA	NA	NA	NA	NA	0	2.03041	0	0	0	1.0152	Inf	0	0.146086	0	0	0	0.073043	Inf
CG12826	TRUE	FALSE	NA	NA	NA	NA	NA	NA	NA	NA	NA	NA	TRUE	FALSE	NA	NA	NA	NA	NA	NA	NA	NA	NA	NA	NA	0	0	0	1.8506	0	0.925301	Inf	0	0	0	0.212066	0	0.106033	Inf
CG12910	TRUE	FALSE	NA	NA	NA	NA	NA	NA	NA	NA	NA	NA	TRUE	FALSE	NA	NA	NA	NA	NA	NA	NA	NA	NA	NA	NA	0	3.05122	0	1.2181	0	2.13466	Inf	0	0.120407	0	0.048011	0	0.084209	Inf
CG12914	TRUE	FALSE	NA	NA	NA	NA	NA	NA	NA	NA	NA	NA	TRUE	FALSE	NA	NA	NA	NA	NA	NA	NA	NA	NA	NA	NA	0	1.02791	0	0	0	0.513954	Inf	0	0.0580688	0	0	0	0.0290344	Inf
CG12934	TRUE	FALSE	NA	NA	NA	NA	NA	NA	NA	NA	NA	NA	TRUE	FALSE	NA	NA	NA	NA	NA	NA	NA	NA	NA	NA	NA	0	1.08068	0	2.95493	0	2.0178	Inf	0	0.0915533	0	0.250038	0	0.170796	Inf
CG1299	TRUE	FALSE	NA	NA	NA	NA	NA	NA	NA	NA	NA	NA	TRUE	FALSE	NA	NA	NA	NA	NA	NA	NA	NA	NA	NA	NA	0	2.16599	0	0	0	1.08299	Inf	0	0.0778494	0	0	0	0.0389247	Inf
CG12998	TRUE	FALSE	NA	NA	NA	NA	NA	NA	NA	NA	NA	NA	TRUE	FALSE	NA	NA	NA	NA	NA	NA	NA	NA	NA	NA	NA	0	0	0	1.4955	0	0.747751	Inf	0	0	0	0.132991	0	0.0664956	Inf
CG13073	TRUE	FALSE	NA	NA	NA	NA	NA	NA	NA	NA	NA	NA	TRUE	FALSE	NA	NA	NA	NA	NA	NA	NA	NA	NA	NA	NA	0	1.0152	0	0.925301	0	0.970253	Inf	0	0.0463746	0	0.0422173	0	0.044296	Inf
CG13074	TRUE	FALSE	NA	NA	NA	NA	NA	NA	NA	NA	NA	NA	TRUE	FALSE	NA	NA	NA	NA	NA	NA	NA	NA	NA	NA	NA	0	0	0	1.8506	0	0.925301	Inf	0	0	0	0.0823459	0	0.041173	Inf
CG13075	TRUE	FALSE	NA	NA	NA	NA	NA	NA	NA	NA	NA	NA	TRUE	FALSE	NA	NA	NA	NA	NA	NA	NA	NA	NA	NA	NA	0	1.0152	0	3.7012	0	2.3582	Inf	0	0.0635089	0	0.231263	0	0.147386	Inf
CG13077	TRUE	FALSE	NA	NA	NA	NA	NA	NA	NA	NA	NA	NA	TRUE	FALSE	NA	NA	NA	NA	NA	NA	NA	NA	NA	NA	NA	0	0	0	1.1367	0	0.568349	Inf	0	0	0	0.0845	0	0.04225	Inf
CG13078	TRUE	FALSE	NA	NA	NA	NA	NA	NA	NA	NA	NA	NA	TRUE	FALSE	NA	NA	NA	NA	NA	NA	NA	NA	NA	NA	NA	0	1.0152	0	0	0	0.507602	Inf	0	0.0848574	0	0	0	0.0424287	Inf
CG13086	TRUE	FALSE	NA	NA	NA	NA	NA	NA	NA	NA	NA	NA	TRUE	FALSE	NA	NA	NA	NA	NA	NA	NA	NA	NA	NA	NA	0	0.864266	0	0	0	0.432133	Inf	0	0.12288	0	0	0	0.0614398	Inf
CG1314	TRUE	FALSE	NA	NA	NA	NA	NA	NA	NA	NA	NA	NA	TRUE	FALSE	NA	NA	NA	NA	NA	NA	NA	NA	NA	NA	NA	0	1.0152	0	0	0	0.507602	Inf	0	0.0498623	0	0	0	0.0249312	Inf
CG1315	TRUE	FALSE	NA	NA	NA	NA	NA	NA	NA	NA	NA	NA	TRUE	FALSE	NA	NA	NA	NA	NA	NA	NA	NA	NA	NA	NA	0	3.10477	0	9.43272	0	6.26874	Inf	0	0.149587	0	0.453924	0	0.301755	Inf
CG13168	TRUE	FALSE	NA	NA	NA	NA	NA	NA	NA	NA	NA	NA	TRUE	FALSE	NA	NA	NA	NA	NA	NA	NA	NA	NA	NA	NA	0	0	0	0.9358	0	0.4679	Inf	0	0	0	0.0415467	0	0.0207734	Inf
CG13178	TRUE	FALSE	NA	NA	NA	NA	NA	NA	NA	NA	NA	NA	TRUE	FALSE	NA	NA	NA	NA	NA	NA	NA	NA	NA	NA	NA	0	1.0152	0	3.7012	0	2.3582	Inf	0	0.0611281	0	0.222593	0	0.141861	Inf
CG13183	TRUE	FALSE	NA	NA	NA	NA	NA	NA	NA	NA	NA	NA	TRUE	FALSE	NA	NA	NA	NA	NA	NA	NA	NA	NA	NA	NA	0	1.0152	0	0	0	0.507602	Inf	0	0.0299867	0	0	0	0.0149934	Inf
CG13198	TRUE	FALSE	NA	NA	NA	NA	NA	NA	NA	NA	NA	NA	TRUE	FALSE	NA	NA	NA	NA	NA	NA	NA	NA	NA	NA	NA	0	1.0152	0	1.8506	0	1.4329	Inf	0	0.17539	0	0.319334	0	0.247362	Inf
CG1324	TRUE	FALSE	NA	NA	NA	NA	NA	NA	NA	NA	NA	NA	TRUE	FALSE	NA	NA	NA	NA	NA	NA	NA	NA	NA	NA	NA	0	0	0	1.06531	0	0.532654	Inf	0	0	0	0.0575129	0	0.0287565	Inf
CG13245	TRUE	FALSE	NA	NA	NA	NA	NA	NA	NA	NA	NA	NA	TRUE	FALSE	NA	NA	NA	NA	NA	NA	NA	NA	NA	NA	NA	0	0	0	0.46265	0	0.231325	Inf	0	0	0	0.0450205	0	0.0225103	Inf
CG13250	TRUE	FALSE	NA	NA	NA	NA	NA	NA	NA	NA	NA	NA	TRUE	FALSE	NA	NA	NA	NA	NA	NA	NA	NA	NA	NA	NA	0	0	0	2.11319	0	1.0566	Inf	0	0	0	0.371119	0	0.18556	Inf
CG13251	TRUE	FALSE	NA	NA	NA	NA	NA	NA	NA	NA	NA	NA	TRUE	FALSE	NA	NA	NA	NA	NA	NA	NA	NA	NA	NA	NA	0	1.0152	0	0	0	0.507602	Inf	0	0.018772	0	0	0	0.009386	Inf
CG13287	TRUE	FALSE	NA	NA	NA	NA	NA	NA	NA	NA	NA	NA	TRUE	FALSE	NA	NA	NA	NA	NA	NA	NA	NA	NA	NA	NA	0	1.0152	0	0.925301	0	0.970253	Inf	0	0.0379933	0	0.0345873	0	0.0362903	Inf
CG13324	TRUE	FALSE	NA	NA	NA	NA	NA	NA	NA	NA	NA	NA	TRUE	FALSE	NA	NA	NA	NA	NA	NA	NA	NA	NA	NA	NA	0	0	0	3.7012	0	1.8506	Inf	0	0	0	0.704175	0	0.352087	Inf
CG13325	TRUE	FALSE	NA	NA	NA	NA	NA	NA	NA	NA	NA	NA	TRUE	FALSE	NA	NA	NA	NA	NA	NA	NA	NA	NA	NA	NA	0	0	0	13.8627	0	6.93136	Inf	0	0	0	0.332541	0	0.16627	Inf
CG13334	TRUE	FALSE	NA	NA	NA	NA	NA	NA	NA	NA	NA	NA	TRUE	FALSE	NA	NA	NA	NA	NA	NA	NA	NA	NA	NA	NA	0	0.849012	0	0.773825	0	0.811418	Inf	0	0.0297942	0	0.0271233	0	0.0284587	Inf
CG13361	TRUE	FALSE	NA	NA	NA	NA	NA	NA	NA	NA	NA	NA	TRUE	FALSE	NA	NA	NA	NA	NA	NA	NA	NA	NA	NA	NA	0	0	0	1.8506	0	0.925301	Inf	0	0	0	0.0804169	0	0.0402084	Inf
CG13376	TRUE	FALSE	NA	NA	NA	NA	NA	NA	NA	NA	NA	NA	TRUE	FALSE	NA	NA	NA	NA	NA	NA	NA	NA	NA	NA	NA	0	0	0	0.9253	0	0.46265	Inf	0	0	0	0.0554796	0	0.0277398	Inf
CG13386	TRUE	FALSE	NA	NA	NA	NA	NA	NA	NA	NA	NA	NA	TRUE	FALSE	NA	NA	NA	NA	NA	NA	NA	NA	NA	NA	NA	0	0	0	0.925301	0	0.46265	Inf	0	0	0	0.0699681	0	0.034984	Inf
CG13423	TRUE	FALSE	NA	NA	NA	NA	NA	NA	NA	NA	NA	NA	TRUE	FALSE	NA	NA	NA	NA	NA	NA	NA	NA	NA	NA	NA	0	0	0	0.925301	0	0.46265	Inf	0	0	0	0.0384897	0	0.0192448	Inf
CG13437	TRUE	FALSE	NA	NA	NA	NA	NA	NA	NA	NA	NA	NA	TRUE	FALSE	NA	NA	NA	NA	NA	NA	NA	NA	NA	NA	NA	0	0	0	0.925301	0	0.46265	Inf	0	0	0	0.0942111	0	0.0471056	Inf
CG13449	TRUE	FALSE	NA	NA	NA	NA	NA	NA	NA	NA	NA	NA	TRUE	FALSE	NA	NA	NA	NA	NA	NA	NA	NA	NA	NA	NA	0	1.55322	0	0	0	0.776608	Inf	0	0.0785593	0	0	0	0.0392797	Inf
CG13455	TRUE	FALSE	NA	NA	NA	NA	NA	NA	NA	NA	NA	NA	TRUE	FALSE	NA	NA	NA	NA	NA	NA	NA	NA	NA	NA	NA	0	1.0152	0	0	0	0.507602	Inf	0	0.0496571	0	0	0	0.0248286	Inf
CG13458	TRUE	FALSE	NA	NA	NA	NA	NA	NA	NA	NA	NA	NA	TRUE	FALSE	NA	NA	NA	NA	NA	NA	NA	NA	NA	NA	NA	0	3.04561	0	0.925301	0	1.98546	Inf	0	0.0910004	0	0.0276142	0	0.0593073	Inf
CG13465	TRUE	FALSE	NA	NA	NA	NA	NA	NA	NA	NA	NA	NA	TRUE	FALSE	NA	NA	NA	NA	NA	NA	NA	NA	NA	NA	NA	0	2.03041	0	0.925301	0	1.47786	Inf	0	0.299424	0	0.136291	0	0.217858	Inf
CG13476	TRUE	FALSE	NA	NA	NA	NA	NA	NA	NA	NA	NA	NA	TRUE	FALSE	NA	NA	NA	NA	NA	NA	NA	NA	NA	NA	NA	0	1.0152	0	0	0	0.507602	Inf	0	0.121887	0	0	0	0.0609433	Inf
CG13492	TRUE	FALSE	NA	NA	NA	NA	NA	NA	NA	NA	NA	NA	TRUE	FALSE	NA	NA	NA	NA	NA	NA	NA	NA	NA	NA	NA	0	0	0	82.3518	0	41.1759	Inf	0	0	0	0.54411	0	0.272055	Inf
CG13501	TRUE	FALSE	NA	NA	NA	NA	NA	NA	NA	NA	NA	NA	TRUE	FALSE	NA	NA	NA	NA	NA	NA	NA	NA	NA	NA	NA	0	1.03244	0	0.941012	0	0.986728	Inf	0	0.0435935	0	0.0396855	0	0.0416395	Inf
CG13561	TRUE	FALSE	NA	NA	NA	NA	NA	NA	NA	NA	NA	NA	TRUE	FALSE	NA	NA	NA	NA	NA	NA	NA	NA	NA	NA	NA	0	1.0152	0	0	0	0.507602	Inf	0	0.18173	0	0	0	0.0908648	Inf
CG13577	TRUE	FALSE	NA	NA	NA	NA	NA	NA	NA	NA	NA	NA	TRUE	FALSE	NA	NA	NA	NA	NA	NA	NA	NA	NA	NA	NA	0	0.739883	0	1.47368	0	1.10678	Inf	0	0.0390507	0	0.0776874	0	0.058369	Inf
CG13611	TRUE	FALSE	NA	NA	NA	NA	NA	NA	NA	NA	NA	NA	TRUE	FALSE	NA	NA	NA	NA	NA	NA	NA	NA	NA	NA	NA	0	1.0152	0	0	0	0.507602	Inf	0	0.0447245	0	0	0	0.0223623	Inf
CG13617	TRUE	FALSE	NA	NA	NA	NA	NA	NA	NA	NA	NA	NA	TRUE	FALSE	NA	NA	NA	NA	NA	NA	NA	NA	NA	NA	NA	0	0	0	0.990429	0	0.495215	Inf	0	0	0	0.0258591	0	0.0129295	Inf
CG13643	TRUE	FALSE	NA	NA	NA	NA	NA	NA	NA	NA	NA	NA	TRUE	FALSE	NA	NA	NA	NA	NA	NA	NA	NA	NA	NA	NA	0	9.20172	0	1.83913	0	5.52043	Inf	0	0.18942	0	0.0378138	0	0.113617	Inf
CG13679	TRUE	FALSE	NA	NA	NA	NA	NA	NA	NA	NA	NA	NA	TRUE	FALSE	NA	NA	NA	NA	NA	NA	NA	NA	NA	NA	NA	0	0	0	2.7759	0	1.38795	Inf	0	0	0	0.568197	0	0.284098	Inf
CG13692	TRUE	FALSE	NA	NA	NA	NA	NA	NA	NA	NA	NA	NA	TRUE	FALSE	NA	NA	NA	NA	NA	NA	NA	NA	NA	NA	NA	0	2.03041	0	0.925301	0	1.47786	Inf	0	0.258944	0	0.117865	0	0.188405	Inf
CG13731	TRUE	FALSE	NA	NA	NA	NA	NA	NA	NA	NA	NA	NA	TRUE	FALSE	NA	NA	NA	NA	NA	NA	NA	NA	NA	NA	NA	0	1.0152	0	0	0	0.507602	Inf	0	0.0216948	0	0	0	0.0108474	Inf
CG13829	TRUE	FALSE	NA	NA	NA	NA	NA	NA	NA	NA	NA	NA	TRUE	FALSE	NA	NA	NA	NA	NA	NA	NA	NA	NA	NA	NA	0	1.0152	0	1.8506	0	1.4329	Inf	0	0.0987458	0	0.179787	0	0.139267	Inf
CG13856	TRUE	FALSE	NA	NA	NA	NA	NA	NA	NA	NA	NA	NA	TRUE	FALSE	NA	NA	NA	NA	NA	NA	NA	NA	NA	NA	NA	0	1.0152	0	0	0	0.507602	Inf	0	0.0810935	0	0	0	0.0405468	Inf
CG1387	TRUE	FALSE	NA	NA	NA	NA	NA	NA	NA	NA	NA	NA	TRUE	FALSE	NA	NA	NA	NA	NA	NA	NA	NA	NA	NA	NA	0	2.03041	0	0	0	1.0152	Inf	0	0.0373927	0	0	0	0.0186964	Inf
CG13872	TRUE	FALSE	NA	NA	NA	NA	NA	NA	NA	NA	NA	NA	TRUE	FALSE	NA	NA	NA	NA	NA	NA	NA	NA	NA	NA	NA	0	1.0152	0	0	0	0.507602	Inf	0	0.0333149	0	0	0	0.0166574	Inf
CG13947	TRUE	FALSE	NA	NA	NA	NA	NA	NA	NA	NA	NA	NA	TRUE	FALSE	NA	NA	NA	NA	NA	NA	NA	NA	NA	NA	NA	0	0	0	3.7012	0	1.8506	Inf	0	0	0	0.773602	0	0.386801	Inf
CG13949	TRUE	FALSE	NA	NA	NA	NA	NA	NA	NA	NA	NA	NA	TRUE	FALSE	NA	NA	NA	NA	NA	NA	NA	NA	NA	NA	NA	0	0	0	2.40538	0	1.20269	Inf	0	0	0	0.245751	0	0.122875	Inf
CG13983	TRUE	FALSE	NA	NA	NA	NA	NA	NA	NA	NA	NA	NA	TRUE	FALSE	NA	NA	NA	NA	NA	NA	NA	NA	NA	NA	NA	0	1.0152	0	0	0	0.507602	Inf	0	0.0889877	0	0	0	0.0444938	Inf
CG13984	TRUE	FALSE	NA	NA	NA	NA	NA	NA	NA	NA	NA	NA	TRUE	FALSE	NA	NA	NA	NA	NA	NA	NA	NA	NA	NA	NA	0	0	0	0.925301	0	0.46265	Inf	0	0	0	0.119924	0	0.0599621	Inf
CG1402	TRUE	FALSE	NA	NA	NA	NA	NA	NA	NA	NA	NA	NA	TRUE	FALSE	NA	NA	NA	NA	NA	NA	NA	NA	NA	NA	NA	0	0	0	0.674342	0	0.337171	Inf	0	0	0	0.0149414	0	0.0074707	Inf
CG14024	TRUE	FALSE	NA	NA	NA	NA	NA	NA	NA	NA	NA	NA	TRUE	FALSE	NA	NA	NA	NA	NA	NA	NA	NA	NA	NA	NA	0	1.27488	0	0	0	0.63744	Inf	0	0.0377319	0	0	0	0.018866	Inf
CG14042	TRUE	FALSE	NA	NA	NA	NA	NA	NA	NA	NA	NA	NA	TRUE	FALSE	NA	NA	NA	NA	NA	NA	NA	NA	NA	NA	NA	0	4.8659	0	0	0	2.43295	Inf	0	0.117266	0	0	0	0.0586331	Inf
CG14054	TRUE	FALSE	NA	NA	NA	NA	NA	NA	NA	NA	NA	NA	TRUE	FALSE	NA	NA	NA	NA	NA	NA	NA	NA	NA	NA	NA	0	2.03041	0	2.7759	0	2.40316	Inf	0	0.167361	0	0.228537	0	0.197949	Inf
CG14096	TRUE	FALSE	NA	NA	NA	NA	NA	NA	NA	NA	NA	NA	TRUE	FALSE	NA	NA	NA	NA	NA	NA	NA	NA	NA	NA	NA	0	1.0152	0	0	0	0.507602	Inf	0	0.232952	0	0	0	0.116476	Inf
CG14120	TRUE	FALSE	NA	NA	NA	NA	NA	NA	NA	NA	NA	NA	TRUE	FALSE	NA	NA	NA	NA	NA	NA	NA	NA	NA	NA	NA	0	0	0	4.6265	0	2.31325	Inf	0	0	0	0.0685358	0	0.0342679	Inf
CG14128	TRUE	FALSE	NA	NA	NA	NA	NA	NA	NA	NA	NA	NA	TRUE	FALSE	NA	NA	NA	NA	NA	NA	NA	NA	NA	NA	NA	0	2.02862	0	0.954778	0	1.4917	Inf	0	0.0708969	0	0.0333281	0	0.0521125	Inf
CG14143	TRUE	FALSE	NA	NA	NA	NA	NA	NA	NA	NA	NA	NA	TRUE	FALSE	NA	NA	NA	NA	NA	NA	NA	NA	NA	NA	NA	0	1.0152	0	0	0	0.507602	Inf	0	0.204523	0	0	0	0.102262	Inf
CG14153	TRUE	FALSE	NA	NA	NA	NA	NA	NA	NA	NA	NA	NA	TRUE	FALSE	NA	NA	NA	NA	NA	NA	NA	NA	NA	NA	NA	0	1.0152	0	1.8506	0	1.4329	Inf	0	0.0733093	0	0.133475	0	0.103392	Inf
CG14154	TRUE	FALSE	NA	NA	NA	NA	NA	NA	NA	NA	NA	NA	TRUE	FALSE	NA	NA	NA	NA	NA	NA	NA	NA	NA	NA	NA	0	0	0	0.966467	0	0.483233	Inf	0	0	0	0.0729415	0	0.0364708	Inf
CG14160	TRUE	FALSE	NA	NA	NA	NA	NA	NA	NA	NA	NA	NA	TRUE	FALSE	NA	NA	NA	NA	NA	NA	NA	NA	NA	NA	NA	0	0	0	4.6265	0	2.31325	Inf	0	0	0	0.143556	0	0.0717782	Inf
CG14195	TRUE	FALSE	NA	NA	NA	NA	NA	NA	NA	NA	NA	NA	TRUE	FALSE	NA	NA	NA	NA	NA	NA	NA	NA	NA	NA	NA	0	1.16638	0	0	0	0.583189	Inf	0	0.0313582	0	0	0	0.0156791	Inf
CG14205	TRUE	FALSE	NA	NA	NA	NA	NA	NA	NA	NA	NA	NA	TRUE	FALSE	NA	NA	NA	NA	NA	NA	NA	NA	NA	NA	NA	0	1.0152	0	0	0	0.507602	Inf	0	0.0282063	0	0	0	0.0141031	Inf
CG1421	TRUE	FALSE	NA	NA	NA	NA	NA	NA	NA	NA	NA	NA	TRUE	FALSE	NA	NA	NA	NA	NA	NA	NA	NA	NA	NA	NA	0	0	0	0.925301	0	0.46265	Inf	0	0	0	0.100228	0	0.0501142	Inf
CG14282	TRUE	FALSE	NA	NA	NA	NA	NA	NA	NA	NA	NA	NA	TRUE	FALSE	NA	NA	NA	NA	NA	NA	NA	NA	NA	NA	NA	0	1.0152	0	1.8506	0	1.4329	Inf	0	0.0765654	0	0.139403	0	0.107984	Inf
CG14312	TRUE	FALSE	NA	NA	NA	NA	NA	NA	NA	NA	NA	NA	TRUE	FALSE	NA	NA	NA	NA	NA	NA	NA	NA	NA	NA	NA	0	1.0152	0	0	0	0.507602	Inf	0	0.204523	0	0	0	0.102262	Inf
CG14313	TRUE	FALSE	NA	NA	NA	NA	NA	NA	NA	NA	NA	NA	TRUE	FALSE	NA	NA	NA	NA	NA	NA	NA	NA	NA	NA	NA	0	0	0	0.925301	0	0.46265	Inf	0	0	0	0.121248	0	0.0606239	Inf
CG14321	TRUE	FALSE	NA	NA	NA	NA	NA	NA	NA	NA	NA	NA	TRUE	FALSE	NA	NA	NA	NA	NA	NA	NA	NA	NA	NA	NA	0	1.0152	0	3.7012	0	2.3582	Inf	0	0.119948	0	0.436781	0	0.278364	Inf
CG14329	TRUE	FALSE	NA	NA	NA	NA	NA	NA	NA	NA	NA	NA	TRUE	FALSE	NA	NA	NA	NA	NA	NA	NA	NA	NA	NA	NA	0	0	0	0.925301	0	0.46265	Inf	0	0	0	0.0607576	0	0.0303788	Inf
CG14421	TRUE	FALSE	NA	NA	NA	NA	NA	NA	NA	NA	NA	NA	TRUE	FALSE	NA	NA	NA	NA	NA	NA	NA	NA	NA	NA	NA	0	0	0	1.8506	0	0.925301	Inf	0	0	0	0.16874	0	0.0843702	Inf
CG14445	TRUE	FALSE	NA	NA	NA	NA	NA	NA	NA	NA	NA	NA	TRUE	FALSE	NA	NA	NA	NA	NA	NA	NA	NA	NA	NA	NA	0	4.33174	0	0.987034	0	2.65939	Inf	0	0.178898	0	0.0407152	0	0.109807	Inf
CG14457	TRUE	FALSE	NA	NA	NA	NA	NA	NA	NA	NA	NA	NA	TRUE	FALSE	NA	NA	NA	NA	NA	NA	NA	NA	NA	NA	NA	0	0	0	1.85549	0	0.927743	Inf	0	0	0	0.100218	0	0.050109	Inf
CG14491	TRUE	FALSE	NA	NA	NA	NA	NA	NA	NA	NA	NA	NA	TRUE	FALSE	NA	NA	NA	NA	NA	NA	NA	NA	NA	NA	NA	0	0	0	0.925301	0	0.46265	Inf	0	0	0	0.181873	0	0.0909365	Inf
CG14499	TRUE	FALSE	NA	NA	NA	NA	NA	NA	NA	NA	NA	NA	TRUE	FALSE	NA	NA	NA	NA	NA	NA	NA	NA	NA	NA	NA	0	0	0	2.7759	0	1.38795	Inf	0	0	0	0.446548	0	0.223274	Inf
CG14500	TRUE	FALSE	NA	NA	NA	NA	NA	NA	NA	NA	NA	NA	TRUE	FALSE	NA	NA	NA	NA	NA	NA	NA	NA	NA	NA	NA	0	0	0	37.012	0	18.506	Inf	0	0	0	4.59625	0	2.29813	Inf
CG14527	TRUE	FALSE	NA	NA	NA	NA	NA	NA	NA	NA	NA	NA	TRUE	FALSE	NA	NA	NA	NA	NA	NA	NA	NA	NA	NA	NA	0	1.0785	0	1.005	0	1.04175	Inf	0	0.0327852	0	0.0305144	0	0.0316498	Inf
CG14537	TRUE	FALSE	NA	NA	NA	NA	NA	NA	NA	NA	NA	NA	TRUE	FALSE	NA	NA	NA	NA	NA	NA	NA	NA	NA	NA	NA	0	2.03041	0	0	0	1.0152	Inf	0	0.197169	0	0	0	0.0985845	Inf
CG14551	TRUE	FALSE	NA	NA	NA	NA	NA	NA	NA	NA	NA	NA	TRUE	FALSE	NA	NA	NA	NA	NA	NA	NA	NA	NA	NA	NA	0	0	0	1.70008	0	0.850038	Inf	0	0	0	0.119144	0	0.0595719	Inf
CG14579	TRUE	FALSE	NA	NA	NA	NA	NA	NA	NA	NA	NA	NA	TRUE	FALSE	NA	NA	NA	NA	NA	NA	NA	NA	NA	NA	NA	0	0	0	0.925301	0	0.46265	Inf	0	0	0	0.0573927	0	0.0286964	Inf
CG14598	TRUE	FALSE	NA	NA	NA	NA	NA	NA	NA	NA	NA	NA	TRUE	FALSE	NA	NA	NA	NA	NA	NA	NA	NA	NA	NA	NA	0	1.0152	0	0	0	0.507602	Inf	0	0.0585193	0	0	0	0.0292597	Inf
CG14610	TRUE	FALSE	NA	NA	NA	NA	NA	NA	NA	NA	NA	NA	TRUE	FALSE	NA	NA	NA	NA	NA	NA	NA	NA	NA	NA	NA	0	0	0	1.8506	0	0.925301	Inf	0	0	0	0.349845	0	0.174922	Inf
CG14645	TRUE	FALSE	NA	NA	NA	NA	NA	NA	NA	NA	NA	NA	TRUE	FALSE	NA	NA	NA	NA	NA	NA	NA	NA	NA	NA	NA	0	1.0152	0	0	0	0.507602	Inf	0	0.287305	0	0	0	0.143652	Inf
CG14742	TRUE	FALSE	NA	NA	NA	NA	NA	NA	NA	NA	NA	NA	TRUE	FALSE	NA	NA	NA	NA	NA	NA	NA	NA	NA	NA	NA	0	2.03041	0	0	0	1.0152	Inf	0	0.292174	0	0	0	0.146087	Inf
CG14744	TRUE	FALSE	NA	NA	NA	NA	NA	NA	NA	NA	NA	NA	TRUE	FALSE	NA	NA	NA	NA	NA	NA	NA	NA	NA	NA	NA	0	1.026	0	0	0	0.512998	Inf	0	0.0246661	0	0	0	0.012333	Inf
CG14763	TRUE	FALSE	NA	NA	NA	NA	NA	NA	NA	NA	NA	NA	TRUE	FALSE	NA	NA	NA	NA	NA	NA	NA	NA	NA	NA	NA	0	0	0	1.28521	0	0.642604	Inf	0	0	0	0.155375	0	0.0776874	Inf
CG14780	TRUE	FALSE	NA	NA	NA	NA	NA	NA	NA	NA	NA	NA	TRUE	FALSE	NA	NA	NA	NA	NA	NA	NA	NA	NA	NA	NA	0	2.03041	0	3.7012	0	2.86581	Inf	0	0.136656	0	0.24881	0	0.192733	Inf
CG14810	TRUE	FALSE	NA	NA	NA	NA	NA	NA	NA	NA	NA	NA	TRUE	FALSE	NA	NA	NA	NA	NA	NA	NA	NA	NA	NA	NA	0	0	0	0.927975	0	0.463988	Inf	0	0	0	0.106033	0	0.0530163	Inf
CG14838	TRUE	FALSE	NA	NA	NA	NA	NA	NA	NA	NA	NA	NA	TRUE	FALSE	NA	NA	NA	NA	NA	NA	NA	NA	NA	NA	NA	0	0	0	0.925301	0	0.46265	Inf	0	0	0	0.0165785	0	0.00828925	Inf
CG14841	TRUE	FALSE	NA	NA	NA	NA	NA	NA	NA	NA	NA	NA	TRUE	FALSE	NA	NA	NA	NA	NA	NA	NA	NA	NA	NA	NA	0	1.0152	0	0	0	0.507602	Inf	0	0.0797009	0	0	0	0.0398504	Inf
CG14852	TRUE	FALSE	NA	NA	NA	NA	NA	NA	NA	NA	NA	NA	TRUE	FALSE	NA	NA	NA	NA	NA	NA	NA	NA	NA	NA	NA	0	1.0152	0	0	0	0.507602	Inf	0	0.1555	0	0	0	0.0777501	Inf
CG14853	TRUE	FALSE	NA	NA	NA	NA	NA	NA	NA	NA	NA	NA	TRUE	FALSE	NA	NA	NA	NA	NA	NA	NA	NA	NA	NA	NA	0	0	0	1.00442	0	0.502208	Inf	0	0	0	0.0340302	0	0.0170151	Inf
CG14861	TRUE	FALSE	NA	NA	NA	NA	NA	NA	NA	NA	NA	NA	TRUE	FALSE	NA	NA	NA	NA	NA	NA	NA	NA	NA	NA	NA	0	0	0	0.925301	0	0.46265	Inf	0	0	0	0.0515242	0	0.0257621	Inf
CG14870	TRUE	FALSE	NA	NA	NA	NA	NA	NA	NA	NA	NA	NA	TRUE	FALSE	NA	NA	NA	NA	NA	NA	NA	NA	NA	NA	NA	0	0	0	1.8506	0	0.925301	Inf	0	0	0	0.16107	0	0.0805352	Inf
CG14963	TRUE	FALSE	NA	NA	NA	NA	NA	NA	NA	NA	NA	NA	TRUE	FALSE	NA	NA	NA	NA	NA	NA	NA	NA	NA	NA	NA	0	11.1673	0	2.7759	0	6.97158	Inf	0	0.905415	0	0.224795	0	0.565105	Inf
CG15005	TRUE	FALSE	NA	NA	NA	NA	NA	NA	NA	NA	NA	NA	TRUE	FALSE	NA	NA	NA	NA	NA	NA	NA	NA	NA	NA	NA	0	1.0152	0	0	0	0.507602	Inf	0	0.0246359	0	0	0	0.0123179	Inf
CG1504	TRUE	FALSE	NA	NA	NA	NA	NA	NA	NA	NA	NA	NA	TRUE	FALSE	NA	NA	NA	NA	NA	NA	NA	NA	NA	NA	NA	0	0.799323	0	0	0	0.399662	Inf	0	0.014875	0	0	0	0.00743752	Inf
CG15040	TRUE	FALSE	NA	NA	NA	NA	NA	NA	NA	NA	NA	NA	TRUE	FALSE	NA	NA	NA	NA	NA	NA	NA	NA	NA	NA	NA	0	3.04561	0	0.925301	0	1.98546	Inf	0	0.0304764	0	0.00924811	0	0.0198623	Inf
CG15043	TRUE	FALSE	NA	NA	NA	NA	NA	NA	NA	NA	NA	NA	TRUE	FALSE	NA	NA	NA	NA	NA	NA	NA	NA	NA	NA	NA	0	0	0	31.3781	0	15.689	Inf	0	0	0	3.10688	0	1.55344	Inf
CG15065	TRUE	FALSE	NA	NA	NA	NA	NA	NA	NA	NA	NA	NA	TRUE	FALSE	NA	NA	NA	NA	NA	NA	NA	NA	NA	NA	NA	0	0	0	0.925301	0	0.46265	Inf	0	0	0	1.14659	0	0.573296	Inf
CG15068	TRUE	FALSE	NA	NA	NA	NA	NA	NA	NA	NA	NA	NA	TRUE	FALSE	NA	NA	NA	NA	NA	NA	NA	NA	NA	NA	NA	0	1.0152	0	0.925301	0	0.970253	Inf	0	1.51423	0	1.37848	0	1.44636	Inf
CG15115	TRUE	FALSE	NA	NA	NA	NA	NA	NA	NA	NA	NA	NA	TRUE	FALSE	NA	NA	NA	NA	NA	NA	NA	NA	NA	NA	NA	0	0	0	0.925301	0	0.46265	Inf	0	0	0	0.0950261	0	0.0475131	Inf
CG15116	TRUE	FALSE	NA	NA	NA	NA	NA	NA	NA	NA	NA	NA	TRUE	FALSE	NA	NA	NA	NA	NA	NA	NA	NA	NA	NA	NA	0	2.03041	0	0	0	1.0152	Inf	0	0.273004	0	0	0	0.136502	Inf
CG15128	TRUE	FALSE	NA	NA	NA	NA	NA	NA	NA	NA	NA	NA	TRUE	FALSE	NA	NA	NA	NA	NA	NA	NA	NA	NA	NA	NA	0	0	0	0.925301	0	0.46265	Inf	0	0	0	0.0303116	0	0.0151558	Inf
CG15143	TRUE	FALSE	NA	NA	NA	NA	NA	NA	NA	NA	NA	NA	TRUE	FALSE	NA	NA	NA	NA	NA	NA	NA	NA	NA	NA	NA	0	2.03041	0	0	0	1.0152	Inf	0	0.0364111	0	0	0	0.0182055	Inf
CG15145	TRUE	FALSE	NA	NA	NA	NA	NA	NA	NA	NA	NA	NA	TRUE	FALSE	NA	NA	NA	NA	NA	NA	NA	NA	NA	NA	NA	0	1.0152	0	0	0	0.507602	Inf	0	0.0233127	0	0	0	0.0116563	Inf
CG15147	TRUE	FALSE	NA	NA	NA	NA	NA	NA	NA	NA	NA	NA	TRUE	FALSE	NA	NA	NA	NA	NA	NA	NA	NA	NA	NA	NA	0	1.0152	0	0	0	0.507602	Inf	0	0.138064	0	0	0	0.069032	Inf
CG15169	TRUE	FALSE	NA	NA	NA	NA	NA	NA	NA	NA	NA	NA	TRUE	FALSE	NA	NA	NA	NA	NA	NA	NA	NA	NA	NA	NA	0	1.0152	0	0	0	0.507602	Inf	0	0.0506578	0	0	0	0.0253289	Inf
CG15170	TRUE	FALSE	NA	NA	NA	NA	NA	NA	NA	NA	NA	NA	TRUE	FALSE	NA	NA	NA	NA	NA	NA	NA	NA	NA	NA	NA	0	1.01605	0	1.85212	0	1.43409	Inf	0	0.0397914	0	0.072448	0	0.0561197	Inf
CG15196	TRUE	FALSE	NA	NA	NA	NA	NA	NA	NA	NA	NA	NA	TRUE	FALSE	NA	NA	NA	NA	NA	NA	NA	NA	NA	NA	NA	0	2.03703	0	3.71327	0	2.87515	Inf	0	0.0875029	0	0.159317	0	0.12341	Inf
CG15213	TRUE	FALSE	NA	NA	NA	NA	NA	NA	NA	NA	NA	NA	TRUE	FALSE	NA	NA	NA	NA	NA	NA	NA	NA	NA	NA	NA	0	2.03041	0	0.925301	0	1.47786	Inf	0	0.722242	0	0.328748	0	0.525495	Inf
CG15233	TRUE	FALSE	NA	NA	NA	NA	NA	NA	NA	NA	NA	NA	TRUE	FALSE	NA	NA	NA	NA	NA	NA	NA	NA	NA	NA	NA	0	3.04561	0	2.7759	0	2.91076	Inf	0	0.290531	0	0.264487	0	0.277509	Inf
CG15254	TRUE	FALSE	NA	NA	NA	NA	NA	NA	NA	NA	NA	NA	TRUE	FALSE	NA	NA	NA	NA	NA	NA	NA	NA	NA	NA	NA	0	1.05007	0	0	0	0.525036	Inf	0	0.0963797	0	0	0	0.0481898	Inf
CG15255	TRUE	FALSE	NA	NA	NA	NA	NA	NA	NA	NA	NA	NA	TRUE	FALSE	NA	NA	NA	NA	NA	NA	NA	NA	NA	NA	NA	0	0	0	17.5596	0	8.77982	Inf	0	0	0	0.974587	0	0.487293	Inf
CG15269	TRUE	FALSE	NA	NA	NA	NA	NA	NA	NA	NA	NA	NA	TRUE	FALSE	NA	NA	NA	NA	NA	NA	NA	NA	NA	NA	NA	0	0	0	0.925301	0	0.46265	Inf	0	0	0	0.028562	0	0.014281	Inf
CG15306	TRUE	FALSE	NA	NA	NA	NA	NA	NA	NA	NA	NA	NA	TRUE	FALSE	NA	NA	NA	NA	NA	NA	NA	NA	NA	NA	NA	0	1.01614	0	0.926147	0	0.971145	Inf	0	0.0428747	0	0.0390309	0	0.0409528	Inf
CG15337	TRUE	FALSE	NA	NA	NA	NA	NA	NA	NA	NA	NA	NA	TRUE	FALSE	NA	NA	NA	NA	NA	NA	NA	NA	NA	NA	NA	0	0	0	0.925301	0	0.46265	Inf	0	0	0	0.044618	0	0.022309	Inf
CG15373	TRUE	FALSE	NA	NA	NA	NA	NA	NA	NA	NA	NA	NA	TRUE	FALSE	NA	NA	NA	NA	NA	NA	NA	NA	NA	NA	NA	0	1.02864	0	0	0	0.51432	Inf	0	0.0183551	0	0	0	0.00917755	Inf
CG15398	TRUE	FALSE	NA	NA	NA	NA	NA	NA	NA	NA	NA	NA	TRUE	FALSE	NA	NA	NA	NA	NA	NA	NA	NA	NA	NA	NA	0	1.0152	0	0.925301	0	0.970253	Inf	0	0.0758913	0	0.069088	0	0.0724896	Inf
CG15399	TRUE	FALSE	NA	NA	NA	NA	NA	NA	NA	NA	NA	NA	TRUE	FALSE	NA	NA	NA	NA	NA	NA	NA	NA	NA	NA	NA	0	0	0	0.925301	0	0.46265	Inf	0	0	0	0.0878801	0	0.04394	Inf
CG15414	TRUE	FALSE	NA	NA	NA	NA	NA	NA	NA	NA	NA	NA	TRUE	FALSE	NA	NA	NA	NA	NA	NA	NA	NA	NA	NA	NA	0	0	0	0.925301	0	0.46265	Inf	0	0	0	0.0456565	0	0.0228283	Inf
CG15423	TRUE	FALSE	NA	NA	NA	NA	NA	NA	NA	NA	NA	NA	TRUE	FALSE	NA	NA	NA	NA	NA	NA	NA	NA	NA	NA	NA	0	1.0152	0	12.0289	0	6.52206	Inf	0	0.164398	0	1.94559	0	1.05499	Inf
CG15434	TRUE	FALSE	NA	NA	NA	NA	NA	NA	NA	NA	NA	NA	TRUE	FALSE	NA	NA	NA	NA	NA	NA	NA	NA	NA	NA	NA	0	1.0152	0	0	0	0.507602	Inf	0	0.231167	0	0	0	0.115583	Inf
CG15446	TRUE	FALSE	NA	NA	NA	NA	NA	NA	NA	NA	NA	NA	TRUE	FALSE	NA	NA	NA	NA	NA	NA	NA	NA	NA	NA	NA	0	2.10554	0	0	0	1.05277	Inf	0	0.117495	0	0	0	0.0587473	Inf
CG15449	TRUE	FALSE	NA	NA	NA	NA	NA	NA	NA	NA	NA	NA	TRUE	FALSE	NA	NA	NA	NA	NA	NA	NA	NA	NA	NA	NA	0	3.04561	0	3.7012	0	3.37341	Inf	0	0.31979	0	0.388163	0	0.353977	Inf
CG15479	TRUE	FALSE	NA	NA	NA	NA	NA	NA	NA	NA	NA	NA	TRUE	FALSE	NA	NA	NA	NA	NA	NA	NA	NA	NA	NA	NA	0	3.04561	0	4.6265	0	3.83606	Inf	0	0.272592	0	0.413592	0	0.343092	Inf
CG15498	TRUE	FALSE	NA	NA	NA	NA	NA	NA	NA	NA	NA	NA	TRUE	FALSE	NA	NA	NA	NA	NA	NA	NA	NA	NA	NA	NA	0	0	0	0.925301	0	0.46265	Inf	0	0	0	0.0584307	0	0.0292154	Inf
CG15530	TRUE	FALSE	NA	NA	NA	NA	NA	NA	NA	NA	NA	NA	TRUE	FALSE	NA	NA	NA	NA	NA	NA	NA	NA	NA	NA	NA	0	1.0152	0	0	0	0.507602	Inf	0	0.0325422	0	0	0	0.0162711	Inf
CG15543	TRUE	FALSE	NA	NA	NA	NA	NA	NA	NA	NA	NA	NA	TRUE	FALSE	NA	NA	NA	NA	NA	NA	NA	NA	NA	NA	NA	0	1.35422	0	0	0	0.677108	Inf	0	0.0720831	0	0	0	0.0360415	Inf
CG15545	TRUE	FALSE	NA	NA	NA	NA	NA	NA	NA	NA	NA	NA	TRUE	FALSE	NA	NA	NA	NA	NA	NA	NA	NA	NA	NA	NA	0	1.0152	0	0	0	0.507602	Inf	0	0.056492	0	0	0	0.028246	Inf
CG15556	TRUE	FALSE	NA	NA	NA	NA	NA	NA	NA	NA	NA	NA	TRUE	FALSE	NA	NA	NA	NA	NA	NA	NA	NA	NA	NA	NA	0	4.13605	0	0.942444	0	2.53925	Inf	0	0.11178	0	0.0254399	0	0.0686099	Inf
CG15563	TRUE	FALSE	NA	NA	NA	NA	NA	NA	NA	NA	NA	NA	TRUE	FALSE	NA	NA	NA	NA	NA	NA	NA	NA	NA	NA	NA	0	1.0152	0	2.7759	0	1.89555	Inf	0	0.133187	0	0.363743	0	0.248465	Inf
CG15578	TRUE	FALSE	NA	NA	NA	NA	NA	NA	NA	NA	NA	NA	TRUE	FALSE	NA	NA	NA	NA	NA	NA	NA	NA	NA	NA	NA	0	0	0	0.925301	0	0.46265	Inf	0	0	0	0.254285	0	0.127143	Inf
CG15580	TRUE	FALSE	NA	NA	NA	NA	NA	NA	NA	NA	NA	NA	TRUE	FALSE	NA	NA	NA	NA	NA	NA	NA	NA	NA	NA	NA	0	1.0152	0	0	0	0.507602	Inf	0	0.0277522	0	0	0	0.0138761	Inf
CG15614	TRUE	FALSE	NA	NA	NA	NA	NA	NA	NA	NA	NA	NA	TRUE	FALSE	NA	NA	NA	NA	NA	NA	NA	NA	NA	NA	NA	0	1.0152	0	0.925301	0	0.970253	Inf	0	0.0455346	0	0.0414526	0	0.0434936	Inf
CG15617	TRUE	FALSE	NA	NA	NA	NA	NA	NA	NA	NA	NA	NA	TRUE	FALSE	NA	NA	NA	NA	NA	NA	NA	NA	NA	NA	NA	0	1.0152	0	0.925301	0	0.970253	Inf	0	0.0548985	0	0.0499771	0	0.0524378	Inf
CG15638	TRUE	FALSE	NA	NA	NA	NA	NA	NA	NA	NA	NA	NA	TRUE	FALSE	NA	NA	NA	NA	NA	NA	NA	NA	NA	NA	NA	0	1.0152	0	0	0	0.507602	Inf	0	0.20877	0	0	0	0.104385	Inf
CG15651	TRUE	FALSE	NA	NA	NA	NA	NA	NA	NA	NA	NA	NA	TRUE	FALSE	NA	NA	NA	NA	NA	NA	NA	NA	NA	NA	NA	0	1.0152	0	1.8506	0	1.4329	Inf	0	0.0256956	0	0.0467842	0	0.0362399	Inf
CG15696	TRUE	FALSE	NA	NA	NA	NA	NA	NA	NA	NA	NA	NA	TRUE	FALSE	NA	NA	NA	NA	NA	NA	NA	NA	NA	NA	NA	0	1.0152	0	0	0	0.507602	Inf	0	0.125174	0	0	0	0.062587	Inf
CG15708	TRUE	FALSE	NA	NA	NA	NA	NA	NA	NA	NA	NA	NA	TRUE	FALSE	NA	NA	NA	NA	NA	NA	NA	NA	NA	NA	NA	0	2.03041	0	0	0	1.0152	Inf	0	0.162187	0	0	0	0.0810935	Inf
CG15710	TRUE	FALSE	NA	NA	NA	NA	NA	NA	NA	NA	NA	NA	TRUE	FALSE	NA	NA	NA	NA	NA	NA	NA	NA	NA	NA	NA	0	0	0	0.925301	0	0.46265	Inf	0	0	0	0.0768182	0	0.0384091	Inf
CG15719	TRUE	FALSE	NA	NA	NA	NA	NA	NA	NA	NA	NA	NA	TRUE	FALSE	NA	NA	NA	NA	NA	NA	NA	NA	NA	NA	NA	0	1.0446	0	0	0	0.522302	Inf	0	0.116475	0	0	0	0.0582373	Inf
CG15725	TRUE	FALSE	NA	NA	NA	NA	NA	NA	NA	NA	NA	NA	TRUE	FALSE	NA	NA	NA	NA	NA	NA	NA	NA	NA	NA	NA	0	1.0152	0	0.925301	0	0.970253	Inf	0	0.0227329	0	0.020695	0	0.021714	Inf
CG15728	TRUE	FALSE	NA	NA	NA	NA	NA	NA	NA	NA	NA	NA	TRUE	FALSE	NA	NA	NA	NA	NA	NA	NA	NA	NA	NA	NA	0	1.07454	0	0	0	0.537271	Inf	0	0.0641163	0	0	0	0.0320582	Inf
CG15767	TRUE	FALSE	NA	NA	NA	NA	NA	NA	NA	NA	NA	NA	TRUE	FALSE	NA	NA	NA	NA	NA	NA	NA	NA	NA	NA	NA	0	0	0	0.925301	0	0.46265	Inf	0	0	0	0.0445095	0	0.0222548	Inf
CG15880	TRUE	FALSE	NA	NA	NA	NA	NA	NA	NA	NA	NA	NA	TRUE	FALSE	NA	NA	NA	NA	NA	NA	NA	NA	NA	NA	NA	0	1.0152	0	0	0	0.507602	Inf	0	0.0865619	0	0	0	0.0432809	Inf
CG15919	TRUE	FALSE	NA	NA	NA	NA	NA	NA	NA	NA	NA	NA	TRUE	FALSE	NA	NA	NA	NA	NA	NA	NA	NA	NA	NA	NA	0	0	0	0.925301	0	0.46265	Inf	0	0	0	0.221475	0	0.110738	Inf
CG15923	TRUE	FALSE	NA	NA	NA	NA	NA	NA	NA	NA	NA	NA	TRUE	FALSE	NA	NA	NA	NA	NA	NA	NA	NA	NA	NA	NA	0	2.03041	0	0	0	1.0152	Inf	0	0.0292879	0	0	0	0.014644	Inf
CG16732	TRUE	FALSE	NA	NA	NA	NA	NA	NA	NA	NA	NA	NA	TRUE	FALSE	NA	NA	NA	NA	NA	NA	NA	NA	NA	NA	NA	0	0	0	6.49588	0	3.24794	Inf	0	0	0	0.248046	0	0.124023	Inf
CG16739	TRUE	FALSE	NA	NA	NA	NA	NA	NA	NA	NA	NA	NA	TRUE	FALSE	NA	NA	NA	NA	NA	NA	NA	NA	NA	NA	NA	0	2.03041	0	0	0	1.0152	Inf	0	0.243282	0	0	0	0.121641	Inf
CG16762	TRUE	FALSE	NA	NA	NA	NA	NA	NA	NA	NA	NA	NA	TRUE	FALSE	NA	NA	NA	NA	NA	NA	NA	NA	NA	NA	NA	0	2.03041	0	0.925301	0	1.47786	Inf	0	0.1759	0	0.0800656	0	0.127983	Inf
CG16775	TRUE	FALSE	NA	NA	NA	NA	NA	NA	NA	NA	NA	NA	TRUE	FALSE	NA	NA	NA	NA	NA	NA	NA	NA	NA	NA	NA	0	0	0	0.925301	0	0.46265	Inf	0	0	0	0.110071	0	0.0550353	Inf
CG1678	TRUE	FALSE	NA	NA	NA	NA	NA	NA	NA	NA	NA	NA	TRUE	FALSE	NA	NA	NA	NA	NA	NA	NA	NA	NA	NA	NA	0	0	0	221.605	0	110.803	Inf	0	0	0	61.4681	0	30.734	Inf
CG16781	TRUE	FALSE	NA	NA	NA	NA	NA	NA	NA	NA	NA	NA	TRUE	FALSE	NA	NA	NA	NA	NA	NA	NA	NA	NA	NA	NA	0	1.01869	0	0	0	0.509345	Inf	0	0.0460559	0	0	0	0.023028	Inf
CG16799	TRUE	FALSE	NA	NA	NA	NA	NA	NA	NA	NA	NA	NA	TRUE	FALSE	NA	NA	NA	NA	NA	NA	NA	NA	NA	NA	NA	0	1.5009	0	8.57816	0	5.03953	Inf	0	0.110805	0	0.632535	0	0.37167	Inf
CG16815	TRUE	FALSE	NA	NA	NA	NA	NA	NA	NA	NA	NA	NA	TRUE	FALSE	NA	NA	NA	NA	NA	NA	NA	NA	NA	NA	NA	0	0	0	1.8506	0	0.925301	Inf	0	0	0	0.211658	0	0.105829	Inf
CG16826	TRUE	FALSE	NA	NA	NA	NA	NA	NA	NA	NA	NA	NA	TRUE	FALSE	NA	NA	NA	NA	NA	NA	NA	NA	NA	NA	NA	0	0	0	799.339	0	399.67	Inf	0	0	0	46.586	0	23.293	Inf
CG16854	TRUE	FALSE	NA	NA	NA	NA	NA	NA	NA	NA	NA	NA	TRUE	FALSE	NA	NA	NA	NA	NA	NA	NA	NA	NA	NA	NA	0	1.20635	0	0	0	0.603176	Inf	0	0.0280489	0	0	0	0.0140245	Inf
CG16885	TRUE	FALSE	NA	NA	NA	NA	NA	NA	NA	NA	NA	NA	TRUE	FALSE	NA	NA	NA	NA	NA	NA	NA	NA	NA	NA	NA	0	0	0	1.8506	0	0.925301	Inf	0	0	0	0.0968691	0	0.0484346	Inf
CG16886	TRUE	FALSE	NA	NA	NA	NA	NA	NA	NA	NA	NA	NA	TRUE	FALSE	NA	NA	NA	NA	NA	NA	NA	NA	NA	NA	NA	0	0	0	0.948575	0	0.474287	Inf	0	0	0	0.0258226	0	0.0129113	Inf
CG16984	TRUE	FALSE	NA	NA	NA	NA	NA	NA	NA	NA	NA	NA	TRUE	FALSE	NA	NA	NA	NA	NA	NA	NA	NA	NA	NA	NA	0	2.03041	0	0.925301	0	1.47786	Inf	0	0.125303	0	0.0570352	0	0.0911692	Inf
CG1701	TRUE	FALSE	NA	NA	NA	NA	NA	NA	NA	NA	NA	NA	TRUE	FALSE	NA	NA	NA	NA	NA	NA	NA	NA	NA	NA	NA	0	0	0	1.83423	0	0.917116	Inf	0	0	0	0.216244	0	0.108122	Inf
CG17010	TRUE	FALSE	NA	NA	NA	NA	NA	NA	NA	NA	NA	NA	TRUE	FALSE	NA	NA	NA	NA	NA	NA	NA	NA	NA	NA	NA	0	0	0	0.925301	0	0.46265	Inf	0	0	0	0.0452428	0	0.0226214	Inf
CG17028	TRUE	FALSE	NA	NA	NA	NA	NA	NA	NA	NA	NA	NA	TRUE	FALSE	NA	NA	NA	NA	NA	NA	NA	NA	NA	NA	NA	0	3.5876	0	1.08996	0	2.33878	Inf	0	0.260808	0	0.0791426	0	0.169975	Inf
CG17109	TRUE	FALSE	NA	NA	NA	NA	NA	NA	NA	NA	NA	NA	TRUE	FALSE	NA	NA	NA	NA	NA	NA	NA	NA	NA	NA	NA	0	2.08509	0	7.60175	0	4.84342	Inf	0	0.108319	0	0.394433	0	0.251376	Inf
CG17110	TRUE	FALSE	NA	NA	NA	NA	NA	NA	NA	NA	NA	NA	TRUE	FALSE	NA	NA	NA	NA	NA	NA	NA	NA	NA	NA	NA	0	4.06082	0	7.24691	0	5.65386	Inf	0	0.163284	0	0.291047	0	0.227165	Inf
CG17122	TRUE	FALSE	NA	NA	NA	NA	NA	NA	NA	NA	NA	NA	TRUE	FALSE	NA	NA	NA	NA	NA	NA	NA	NA	NA	NA	NA	0	1.0152	0	3.7012	0	2.3582	Inf	0	0.0345156	0	0.125686	0	0.0801007	Inf
CG17139	TRUE	FALSE	NA	NA	NA	NA	NA	NA	NA	NA	NA	NA	TRUE	FALSE	NA	NA	NA	NA	NA	NA	NA	NA	NA	NA	NA	0	0.983449	0	0.896357	0	0.939903	Inf	0	0.0265784	0	0.0241958	0	0.0253871	Inf
CG17140	TRUE	FALSE	NA	NA	NA	NA	NA	NA	NA	NA	NA	NA	TRUE	FALSE	NA	NA	NA	NA	NA	NA	NA	NA	NA	NA	NA	0	2.38372	0	0.753795	0	1.56876	Inf	0	0.0868303	0	0.0274253	0	0.0571278	Inf
CG17150	TRUE	FALSE	NA	NA	NA	NA	NA	NA	NA	NA	NA	NA	TRUE	FALSE	NA	NA	NA	NA	NA	NA	NA	NA	NA	NA	NA	0	0	0	0.512186	0	0.256093	Inf	0	0	0	0.00403619	0	0.0020181	Inf
CG17192	TRUE	FALSE	NA	NA	NA	NA	NA	NA	NA	NA	NA	NA	TRUE	FALSE	NA	NA	NA	NA	NA	NA	NA	NA	NA	NA	NA	0	0	0	36.0867	0	18.0434	Inf	0	0	0	2.51122	0	1.25561	Inf
CG17237	TRUE	FALSE	NA	NA	NA	NA	NA	NA	NA	NA	NA	NA	TRUE	FALSE	NA	NA	NA	NA	NA	NA	NA	NA	NA	NA	NA	0	1.0152	0	0	0	0.507602	Inf	0	0.0843827	0	0	0	0.0421913	Inf
CG17239	TRUE	FALSE	NA	NA	NA	NA	NA	NA	NA	NA	NA	NA	TRUE	FALSE	NA	NA	NA	NA	NA	NA	NA	NA	NA	NA	NA	0	1.07032	0	0	0	0.535161	Inf	0	0.105663	0	0	0	0.0528317	Inf
CG17290	TRUE	FALSE	NA	NA	NA	NA	NA	NA	NA	NA	NA	NA	TRUE	FALSE	NA	NA	NA	NA	NA	NA	NA	NA	NA	NA	NA	0	0	0	0.512337	0	0.256168	Inf	0	0	0	0.0244762	0	0.0122381	Inf
CG17350	TRUE	FALSE	NA	NA	NA	NA	NA	NA	NA	NA	NA	NA	TRUE	FALSE	NA	NA	NA	NA	NA	NA	NA	NA	NA	NA	NA	0	0	0	0.925301	0	0.46265	Inf	0	0	0	0.0599616	0	0.0299808	Inf
CG17378	TRUE	FALSE	NA	NA	NA	NA	NA	NA	NA	NA	NA	NA	TRUE	FALSE	NA	NA	NA	NA	NA	NA	NA	NA	NA	NA	NA	0	2.3848	0	0	0	1.1924	Inf	0	0.0695084	0	0	0	0.0347542	Inf
CG17572	TRUE	FALSE	NA	NA	NA	NA	NA	NA	NA	NA	NA	NA	TRUE	FALSE	NA	NA	NA	NA	NA	NA	NA	NA	NA	NA	NA	0	0	0	0.925301	0	0.46265	Inf	0	0	0	0.0479693	0	0.0239846	Inf
CG17625	TRUE	FALSE	NA	NA	NA	NA	NA	NA	NA	NA	NA	NA	TRUE	FALSE	NA	NA	NA	NA	NA	NA	NA	NA	NA	NA	NA	0	1.0152	0	2.7759	0	1.89555	Inf	0	0.167595	0	0.457712	0	0.312654	Inf
CG17633	TRUE	FALSE	NA	NA	NA	NA	NA	NA	NA	NA	NA	NA	TRUE	FALSE	NA	NA	NA	NA	NA	NA	NA	NA	NA	NA	NA	0	0	0	10.1783	0	5.08915	Inf	0	0	0	0.524911	0	0.262456	Inf
CG17856	TRUE	FALSE	NA	NA	NA	NA	NA	NA	NA	NA	NA	NA	TRUE	FALSE	NA	NA	NA	NA	NA	NA	NA	NA	NA	NA	NA	0	1.0152	0	0	0	0.507602	Inf	0	0.198468	0	0	0	0.0992341	Inf
CG17929	TRUE	FALSE	NA	NA	NA	NA	NA	NA	NA	NA	NA	NA	TRUE	FALSE	NA	NA	NA	NA	NA	NA	NA	NA	NA	NA	NA	0	0	0	0.925301	0	0.46265	Inf	0	0	0	0.0373384	0	0.0186692	Inf
CG17999	TRUE	FALSE	NA	NA	NA	NA	NA	NA	NA	NA	NA	NA	TRUE	FALSE	NA	NA	NA	NA	NA	NA	NA	NA	NA	NA	NA	0	0	0	0.925301	0	0.46265	Inf	0	0	0	0.0368128	0	0.0184064	Inf
CG18063	TRUE	FALSE	NA	NA	NA	NA	NA	NA	NA	NA	NA	NA	TRUE	FALSE	NA	NA	NA	NA	NA	NA	NA	NA	NA	NA	NA	0	1.01894	0	0	0	0.509468	Inf	0	0.0560177	0	0	0	0.0280088	Inf
CG18095	TRUE	FALSE	NA	NA	NA	NA	NA	NA	NA	NA	NA	NA	TRUE	FALSE	NA	NA	NA	NA	NA	NA	NA	NA	NA	NA	NA	0	6.75476	0	1.8506	0	4.30268	Inf	0	0.244926	0	0.0670222	0	0.155974	Inf
CG18132	TRUE	FALSE	NA	NA	NA	NA	NA	NA	NA	NA	NA	NA	TRUE	FALSE	NA	NA	NA	NA	NA	NA	NA	NA	NA	NA	NA	0	0	0	1.8506	0	0.925301	Inf	0	0	0	0.226496	0	0.113248	Inf
CG18136	TRUE	FALSE	NA	NA	NA	NA	NA	NA	NA	NA	NA	NA	TRUE	FALSE	NA	NA	NA	NA	NA	NA	NA	NA	NA	NA	NA	0	1.0152	0	0	0	0.507602	Inf	0	0.0364112	0	0	0	0.0182056	Inf
CG18173	TRUE	FALSE	NA	NA	NA	NA	NA	NA	NA	NA	NA	NA	TRUE	FALSE	NA	NA	NA	NA	NA	NA	NA	NA	NA	NA	NA	0	0	0	1.71927	0	0.859637	Inf	0	0	0	0.0548972	0	0.0274486	Inf
CG18179	TRUE	FALSE	NA	NA	NA	NA	NA	NA	NA	NA	NA	NA	TRUE	FALSE	NA	NA	NA	NA	NA	NA	NA	NA	NA	NA	NA	0	0	0	6.47711	0	3.23855	Inf	0	0	0	0.572988	0	0.286494	Inf
CG18368	TRUE	FALSE	NA	NA	NA	NA	NA	NA	NA	NA	NA	NA	TRUE	FALSE	NA	NA	NA	NA	NA	NA	NA	NA	NA	NA	NA	0	2.03041	0	0	0	1.0152	Inf	0	0.0329689	0	0	0	0.0164845	Inf
CG18404	TRUE	FALSE	NA	NA	NA	NA	NA	NA	NA	NA	NA	NA	TRUE	FALSE	NA	NA	NA	NA	NA	NA	NA	NA	NA	NA	NA	0	0	0	15.7301	0	7.86506	Inf	0	0	0	2.28856	0	1.14428	Inf
CG18420	TRUE	FALSE	NA	NA	NA	NA	NA	NA	NA	NA	NA	NA	TRUE	FALSE	NA	NA	NA	NA	NA	NA	NA	NA	NA	NA	NA	0	0	0	0.925301	0	0.46265	Inf	0	0	0	0.0331271	0	0.0165635	Inf
CG18467	TRUE	FALSE	NA	NA	NA	NA	NA	NA	NA	NA	NA	NA	TRUE	FALSE	NA	NA	NA	NA	NA	NA	NA	NA	NA	NA	NA	0	2.03041	0	0	0	1.0152	Inf	0	0.0955398	0	0	0	0.0477699	Inf
CG18478	TRUE	FALSE	NA	NA	NA	NA	NA	NA	NA	NA	NA	NA	TRUE	FALSE	NA	NA	NA	NA	NA	NA	NA	NA	NA	NA	NA	0	0	0	0.925301	0	0.46265	Inf	0	0	0	0.0731358	0	0.0365679	Inf
CG18493	TRUE	FALSE	NA	NA	NA	NA	NA	NA	NA	NA	NA	NA	TRUE	FALSE	NA	NA	NA	NA	NA	NA	NA	NA	NA	NA	NA	0	0	0	3.7012	0	1.8506	Inf	0	0	0	0.160716	0	0.0803581	Inf
CG1850	TRUE	FALSE	NA	NA	NA	NA	NA	NA	NA	NA	NA	NA	TRUE	FALSE	NA	NA	NA	NA	NA	NA	NA	NA	NA	NA	NA	0	2.03041	0	1.8506	0	1.94051	Inf	0	0.0547489	0	0.0498409	0	0.0522949	Inf
CG18538	TRUE	FALSE	NA	NA	NA	NA	NA	NA	NA	NA	NA	NA	TRUE	FALSE	NA	NA	NA	NA	NA	NA	NA	NA	NA	NA	NA	0	1.0152	0	0.925301	0	0.970253	Inf	0	0.172383	0	0.15693	0	0.164657	Inf
CG18563	TRUE	FALSE	NA	NA	NA	NA	NA	NA	NA	NA	NA	NA	TRUE	FALSE	NA	NA	NA	NA	NA	NA	NA	NA	NA	NA	NA	0	2.03041	0	4.6265	0	3.32846	Inf	0	0.114702	0	0.26105	0	0.187876	Inf
CG18577	TRUE	FALSE	NA	NA	NA	NA	NA	NA	NA	NA	NA	NA	TRUE	FALSE	NA	NA	NA	NA	NA	NA	NA	NA	NA	NA	NA	0	0	0	2.7759	0	1.38795	Inf	0	0	0	0.270123	0	0.135062	Inf
CG18599	TRUE	FALSE	NA	NA	NA	NA	NA	NA	NA	NA	NA	NA	TRUE	FALSE	NA	NA	NA	NA	NA	NA	NA	NA	NA	NA	NA	0	0	0	1.8506	0	0.925301	Inf	0	0	0	0.0666562	0	0.0333281	Inf
CG18606	TRUE	FALSE	NA	NA	NA	NA	NA	NA	NA	NA	NA	NA	TRUE	FALSE	NA	NA	NA	NA	NA	NA	NA	NA	NA	NA	NA	0	1.0152	0	0	0	0.507602	Inf	0	0.0741198	0	0	0	0.0370599	Inf
[truncated: 16,528 more rows]
